# Supplementary material
Source: publisher figshare collection journal article supplement (https://acs.figshare.com/ndownloader/files/5887422)
Supplement: Supplementary file 1 [file 5887422]

 
data_TAz2
 
_audit_creation_method            'SHELXL-2014/7'
_shelx_SHELXL_version_number      '2014/7'
_chemical_name_systematic         ?
_chemical_name_common             ?
_chemical_melting_point           ?
_chemical_formula_moiety          'C30 H20'
_chemical_formula_sum
 'C30 H20' 
_chemical_formula_weight          380.46

loop_
 _atom_type_symbol
 _atom_type_description
 _atom_type_scat_dispersion_real
 _atom_type_scat_dispersion_imag
 _atom_type_scat_source
 'C'  'C'   0.0033   0.0016
 'International Tables Vol C Tables 4.2.6.8 and 6.1.1.4'
 'H'  'H'   0.0000   0.0000
 'International Tables Vol C Tables 4.2.6.8 and 6.1.1.4'
 
_space_group_crystal_system       triclinic
_space_group_IT_number            2
_space_group_name_H-M_alt         'P -1'
_space_group_name_Hall            '-P 1'
 
_shelx_space_group_comment
;
The symmetry employed for this shelxl refinement is uniquely defined
by the following loop, which should always be used as a source of
symmetry information in preference to the above space-group names.
They are only intended as comments.
;
 
loop_
 _space_group_symop_operation_xyz
 'x, y, z'
 '-x, -y, -z'
 
_cell_length_a                    5.917(4)
_cell_length_b                    7.782(4)
_cell_length_c                    20.718(12)
_cell_angle_alpha                 81.545(15)
_cell_angle_beta                  87.448(16)
_cell_angle_gamma                 89.023(18)
_cell_volume                      942.6(9)
_cell_formula_units_Z             2
_cell_measurement_temperature     93
_cell_measurement_reflns_used     6118
_cell_measurement_theta_min       2.9710
_cell_measurement_theta_max       30.9060
 
_exptl_crystal_description        'platelet'
_exptl_crystal_colour             'blue'
_exptl_crystal_density_meas       ?
_exptl_crystal_density_method     ?
_exptl_crystal_density_diffrn     1.340          
_exptl_crystal_F_000              400
_exptl_transmission_factor_min    ?
_exptl_transmission_factor_max    ?
_exptl_crystal_size_max           0.200
_exptl_crystal_size_mid           0.100
_exptl_crystal_size_min           0.050
_exptl_absorpt_coefficient_mu     0.076
_shelx_estimated_absorpt_T_min    0.985
_shelx_estimated_absorpt_T_max    0.996
_exptl_absorpt_correction_T_min                   0.95198
_exptl_absorpt_correction_T_max                   1.00000
_exptl_absorpt_correction_type            multi-scan
_exptl_absorpt_process_details
;
CrysAlisPro 1.171.38.41 (Rigaku Oxford Diffraction, 2015)
Empirical absorption correction using spherical harmonics,
 implemented in SCALE3 ABSPACK scaling algorithm.
;
_oxdiff_exptl_absorpt_empirical_full_min           0.911
_oxdiff_exptl_absorpt_empirical_full_max           1.074
_oxdiff_exptl_absorpt_empirical_details
;
Empirical correction (ABSPACK) includes:
- Absorption correction using spherical harmonics
- Frame scaling
- Detector area scaling
;
_diffrn_ambient_temperature       93
_diffrn_radiation_wavelength      0.71073
_diffrn_radiation_type            MoK\a
_diffrn_source                    'Rotating Anode'
_diffrn_measurement_device_type   'Rigaku Saturn 70 CCD area detector'
_diffrn_measurement_method        '\w'
_diffrn_detector_area_resol_mean  28.5714
_diffrn_reflns_number             16883
_diffrn_reflns_av_unetI/netI      0.0478
_diffrn_reflns_av_R_equivalents   0.0403
_diffrn_reflns_limit_h_min        -7
_diffrn_reflns_limit_h_max        7
_diffrn_reflns_limit_k_min        -10
_diffrn_reflns_limit_k_max        10
_diffrn_reflns_limit_l_min        -27
_diffrn_reflns_limit_l_max        27
_diffrn_reflns_theta_min          4.054
_diffrn_reflns_theta_max          28.698
_diffrn_reflns_theta_full         25.242
_diffrn_measured_fraction_theta_max   0.997
_diffrn_measured_fraction_theta_full  0.996
_diffrn_reflns_Laue_measured_fraction_max    0.997
_diffrn_reflns_Laue_measured_fraction_full   0.996
_diffrn_reflns_point_group_measured_fraction_max   0.997
_diffrn_reflns_point_group_measured_fraction_full  0.996
_reflns_number_total              4849
_reflns_number_gt                 3180
_reflns_threshold_expression      'I > 2\s(I)'
_reflns_Friedel_coverage          0.000
_reflns_Friedel_fraction_max      .
_reflns_Friedel_fraction_full     .
 
_reflns_special_details
;
 Reflections were merged by SHELXL according to the crystal
 class for the calculation of statistics and refinement.
 
 _reflns_Friedel_fraction is defined as the number of unique
 Friedel pairs measured divided by the number that would be
 possible theoretically, ignoring centric projections and
 systematic absences.
;
 
_computing_data_collection        'CrysAlisPro 1.171.38.41 (Rigaku OD, 2015)'
_computing_cell_refinement        'CrysAlisPro 1.171.38.41 (Rigaku OD, 2015)'
_computing_data_reduction         'CrysAlisPro 1.171.38.41 (Rigaku OD, 2015)'
_computing_structure_solution     'SHELXT (Sheldrick, 2015)'
_computing_structure_refinement   'SHELXL-2014 (Sheldrick, 2015)'
_computing_molecular_graphics     'ORTEP-3 for Windows (Farrugia, 2012)'
_computing_publication_material   'Yadokari-XG (Wakita, Nemoto et al., 2009)'
_publ_section_references
;
Wakita, K. (2001). Yadokari-XG. Software for Crystal Structure Analyses.
Release of Software (Yadokari-XG 2009) for Crystal Structure Analyses,
Kabuto, C., Akine, S., Nemoto, T. and Kwon, E. (2009). J. Cryst. Soc. Jpn.,
51, 218-224.
;
_refine_special_details           ?
_refine_ls_structure_factor_coef  Fsqd
_refine_ls_matrix_type            full
_refine_ls_weighting_scheme       calc
_refine_ls_weighting_details
'w=1/[\s^2^(Fo^2^)+(0.0806P)^2^+0.1722P] where P=(Fo^2^+2Fc^2^)/3'
_atom_sites_solution_primary      direct
_atom_sites_solution_secondary    difmap
_atom_sites_solution_hydrogens    geom
_refine_ls_hydrogen_treatment     constr
_refine_ls_extinction_method      none
_refine_ls_extinction_coef        .
_refine_ls_number_reflns          4849
_refine_ls_number_parameters      325
_refine_ls_number_restraints      132
_refine_ls_R_factor_all           0.1002
_refine_ls_R_factor_gt            0.0614
_refine_ls_wR_factor_ref          0.1664
_refine_ls_wR_factor_gt           0.1437
_refine_ls_goodness_of_fit_ref    1.041
_refine_ls_restrained_S_all       1.027
_refine_ls_shift/su_max           0.000
_refine_ls_shift/su_mean          0.000
 
loop_
 _atom_site_label
 _atom_site_type_symbol
 _atom_site_fract_x
 _atom_site_fract_y
 _atom_site_fract_z
 _atom_site_U_iso_or_equiv
 _atom_site_adp_type
 _atom_site_occupancy
 _atom_site_site_symmetry_order  
 _atom_site_calc_flag
 _atom_site_refinement_flags_posn
 _atom_site_refinement_flags_adp
 _atom_site_refinement_flags_occupancy
 _atom_site_disorder_assembly
 _atom_site_disorder_group
C1 C 0.6814(3) 0.6825(2) 0.71670(8) 0.0221(4) Uani 1 1 d . . . . .
H1 H 0.8149 0.7279 0.6937 0.026 Uiso 1 1 calc R U . . .
C2 C 0.5058(3) 0.5982(2) 0.68926(8) 0.0201(4) Uani 1 1 d . . . . .
C3 C 0.3355(3) 0.5525(2) 0.73915(8) 0.0219(4) Uani 1 1 d . . . . .
H3 H 0.1981 0.4959 0.7338 0.026 Uiso 1 1 calc R U . . .
C4 C 0.2852(3) 0.5746(2) 0.85750(9) 0.0242(4) Uani 1 1 d . . . . .
H4 H 0.1434 0.5189 0.8578 0.029 Uiso 1 1 calc R U . . .
C5 C 0.3466(3) 0.6153(2) 0.91757(9) 0.0261(4) Uani 1 1 d . . . . .
H5 H 0.2422 0.5821 0.9532 0.031 Uiso 1 1 calc R U . . .
C6 C 0.5421(3) 0.6990(2) 0.93262(9) 0.0269(4) Uani 1 1 d . . . . .
H6 H 0.5513 0.7142 0.9771 0.032 Uiso 1 1 calc R U . . .
C7 C 0.7238(3) 0.7627(2) 0.89181(8) 0.0252(4) Uani 1 1 d . . . . .
H7 H 0.8377 0.8175 0.9122 0.030 Uiso 1 1 calc R U . . .
C8 C 0.7629(3) 0.7577(2) 0.82523(8) 0.0232(4) Uani 1 1 d . . . . .
H8 H 0.9002 0.8084 0.8067 0.028 Uiso 1 1 calc R U . . .
C9 C 0.6278(3) 0.6884(2) 0.78227(8) 0.0215(4) Uani 1 1 d . . . . .
C10 C 0.4017(3) 0.6037(2) 0.79727(9) 0.0219(4) Uani 1 1 d . . . . .
C11A C 0.672(4) 0.526(3) 0.4044(10) 0.0201(13) Uani 0.5 1 d . U P A -1
H11A H 0.8052 0.5734 0.3817 0.024 Uiso 0.5 1 calc R U P A -1
C12A C 0.500(9) 0.438(9) 0.377(3) 0.0200(13) Uani 0.5 1 d . U P A -1
C13A C 0.315(6) 0.399(3) 0.4234(15) 0.0214(12) Uani 0.5 1 d . U P A -1
H13A H 0.1742 0.3489 0.4162 0.026 Uiso 0.5 1 calc R U P A -1
C14A C 0.2609(6) 0.4299(4) 0.54252(18) 0.0209(7) Uani 0.5 1 d . U P A -1
H14A H 0.1206 0.3723 0.5425 0.025 Uiso 0.5 1 calc R U P A -1
C15A C 0.312(4) 0.481(3) 0.6025(10) 0.0201(13) Uani 0.5 1 d . U P A -1
H15A H 0.1972 0.4591 0.6361 0.024 Uiso 0.5 1 calc R U P A -1
C16A C 0.510(9) 0.562(9) 0.621(3) 0.0200(13) Uani 0.5 1 d . U P A -1
C17A C 0.688(6) 0.619(3) 0.5770(15) 0.0214(12) Uani 0.5 1 d . U P A -1
H17A H 0.7967 0.6832 0.5957 0.026 Uiso 0.5 1 calc R U P A -1
C18A C 0.7404(6) 0.6035(4) 0.51311(17) 0.0206(7) Uani 0.5 1 d . U P A -1
H18A H 0.8837 0.6475 0.4966 0.025 Uiso 0.5 1 calc R U P A -1
C19A C 0.6138(7) 0.5324(4) 0.46919(19) 0.0195(7) Uani 0.5 1 d . U P A -1
C20A C 0.3853(6) 0.4506(4) 0.48280(18) 0.0197(7) Uani 0.5 1 d . U P A -1
C21 C 0.1917(3) 0.0493(2) 0.73288(8) 0.0210(4) Uani 1 1 d . . . . .
H21 H 0.3284 -0.0083 0.7225 0.025 Uiso 1 1 calc R U . . .
C22 C 0.0150(3) 0.0977(2) 0.68939(8) 0.0210(4) Uani 1 1 d . . . . .
C23 C -0.1563(3) 0.1838(2) 0.72295(8) 0.0226(4) Uani 1 1 d . . . . .
H23 H -0.2920 0.2316 0.7047 0.027 Uiso 1 1 calc R U . . .
C24 C -0.2238(3) 0.2574(2) 0.83457(9) 0.0239(4) Uani 1 1 d . . . . .
H24 H -0.3615 0.3123 0.8206 0.029 Uiso 1 1 calc R U . . .
C25 C -0.1795(3) 0.2582(2) 0.90001(9) 0.0252(4) Uani 1 1 d . . . . .
H25 H -0.2914 0.3126 0.9246 0.030 Uiso 1 1 calc R U . . .
C26 C 0.0075(3) 0.1897(2) 0.93417(9) 0.0273(4) Uani 1 1 d . . . . .
H26 H 0.0036 0.2023 0.9791 0.033 Uiso 1 1 calc R U . . .
C27 C 0.1999(3) 0.1053(2) 0.91193(9) 0.0265(4) Uani 1 1 d . . . . .
H27 H 0.3076 0.0691 0.9439 0.032 Uiso 1 1 calc R U . . .
C28 C 0.2563(3) 0.0667(2) 0.84972(8) 0.0242(4) Uani 1 1 d . . . . .
H28 H 0.3983 0.0101 0.8450 0.029 Uiso 1 1 calc R U . . .
C29 C 0.1325(3) 0.0998(2) 0.79334(8) 0.0215(4) Uani 1 1 d . . . . .
C30 C -0.0948(3) 0.1875(2) 0.78684(8) 0.0217(4) Uani 1 1 d . . . . .
C31A C 0.174(5) -0.105(3) 0.4194(11) 0.0197(14) Uani 0.5 1 d . U P B -1
H31A H 0.3119 -0.1583 0.4079 0.024 Uiso 0.5 1 calc R U P B -1
C32A C -0.018(6) -0.060(7) 0.378(3) 0.0193(14) Uani 0.5 1 d . U P B -1
C33A C -0.180(5) 0.025(4) 0.4094(12) 0.0214(13) Uani 0.5 1 d . U P B -1
H33A H -0.3154 0.0732 0.3912 0.026 Uiso 0.5 1 calc R U P B -1
C34A C -0.2390(6) 0.1035(4) 0.52160(17) 0.0203(7) Uani 0.5 1 d . U P B -1
H34A H -0.3833 0.1492 0.5094 0.024 Uiso 0.5 1 calc R U P B -1
C35A C -0.184(5) 0.119(3) 0.5856(12) 0.0197(14) Uani 0.5 1 d . U P B -1
H35A H -0.2948 0.1797 0.6084 0.024 Uiso 0.5 1 calc R U P B -1
C36A C 0.000(6) 0.062(7) 0.622(3) 0.0193(14) Uani 0.5 1 d . U P B -1
C37A C 0.198(5) -0.027(4) 0.5951(13) 0.0214(13) Uani 0.5 1 d . U P B -1
H37A H 0.3159 -0.0541 0.6248 0.026 Uiso 0.5 1 calc R U P B -1
C38A C 0.2417(6) -0.0781(4) 0.53415(17) 0.0210(7) Uani 0.5 1 d . U P B -1
H38A H 0.3806 -0.1392 0.5296 0.025 Uiso 0.5 1 calc R U P B -1
C39A C 0.1138(6) -0.0537(4) 0.47891(17) 0.0180(6) Uani 0.5 1 d . U P B -1
C40A C -0.1154(6) 0.0316(4) 0.47276(18) 0.0190(7) Uani 0.5 1 d . U P B -1
 
loop_
 _atom_site_aniso_label
 _atom_site_aniso_U_11
 _atom_site_aniso_U_22
 _atom_site_aniso_U_33
 _atom_site_aniso_U_23
 _atom_site_aniso_U_13
 _atom_site_aniso_U_12
C1 0.0172(8) 0.0216(8) 0.0271(9) -0.0025(7) -0.0005(7) -0.0009(6)
C2 0.0171(8) 0.0170(8) 0.0258(9) -0.0010(6) -0.0035(7) 0.0014(6)
C3 0.0169(8) 0.0209(8) 0.0279(9) -0.0025(7) -0.0036(7) 0.0001(6)
C4 0.0193(8) 0.0228(8) 0.0297(10) -0.0014(7) -0.0014(7) 0.0012(7)
C5 0.0268(9) 0.0258(9) 0.0248(9) -0.0014(7) 0.0011(7) 0.0036(7)
C6 0.0302(10) 0.0267(9) 0.0242(9) -0.0043(7) -0.0054(7) 0.0041(7)
C7 0.0246(9) 0.0244(9) 0.0277(10) -0.0059(7) -0.0069(7) 0.0010(7)
C8 0.0201(8) 0.0215(8) 0.0279(10) -0.0020(7) -0.0048(7) 0.0001(7)
C9 0.0184(8) 0.0175(8) 0.0284(9) -0.0016(7) -0.0035(7) 0.0022(6)
C10 0.0197(8) 0.0183(8) 0.0271(9) -0.0014(7) -0.0035(7) 0.0031(6)
C11A 0.017(3) 0.0196(18) 0.024(3) -0.0043(19) 0.000(2) -0.0005(16)
C12A 0.017(3) 0.0182(8) 0.025(3) -0.0025(16) -0.003(2) 0.002(2)
C13A 0.0184(10) 0.018(3) 0.0278(10) -0.003(2) -0.0032(7) 0.001(2)
C14A 0.0134(16) 0.0203(16) 0.028(2) -0.0016(13) 0.0014(15) -0.0023(14)
C15A 0.017(3) 0.0196(18) 0.024(3) -0.0043(19) 0.000(2) -0.0005(16)
C16A 0.017(3) 0.0182(8) 0.025(3) -0.0025(16) -0.003(2) 0.002(2)
C17A 0.0184(10) 0.018(3) 0.0278(10) -0.003(2) -0.0032(7) 0.001(2)
C18A 0.0156(16) 0.0164(15) 0.0291(19) -0.0002(13) -0.0015(14) -0.0022(13)
C19A 0.0192(18) 0.0158(15) 0.0236(19) -0.0030(13) -0.0007(15) 0.0010(13)
C20A 0.0164(17) 0.0149(15) 0.028(2) -0.0022(13) -0.0032(14) -0.0004(13)
C21 0.0158(8) 0.0216(8) 0.0252(9) -0.0026(7) -0.0001(6) 0.0000(6)
C22 0.0184(8) 0.0187(8) 0.0250(9) 0.0001(6) -0.0011(7) -0.0015(6)
C23 0.0179(8) 0.0211(8) 0.0282(9) -0.0017(7) -0.0034(7) 0.0017(6)
C24 0.0194(8) 0.0202(8) 0.0319(10) -0.0037(7) -0.0004(7) -0.0013(6)
C25 0.0244(9) 0.0244(9) 0.0273(10) -0.0067(7) 0.0041(7) -0.0017(7)
C26 0.0327(10) 0.0254(9) 0.0240(9) -0.0041(7) -0.0010(8) -0.0049(7)
C27 0.0253(9) 0.0264(9) 0.0280(10) -0.0023(7) -0.0073(7) -0.0025(7)
C28 0.0222(9) 0.0222(8) 0.0279(10) -0.0022(7) -0.0046(7) -0.0010(7)
C29 0.0178(8) 0.0189(8) 0.0275(9) -0.0015(7) -0.0023(7) -0.0025(6)
C30 0.0187(8) 0.0183(8) 0.0280(9) -0.0026(7) -0.0015(7) -0.0018(6)
C31A 0.016(2) 0.019(3) 0.024(3) -0.0036(17) -0.0010(18) 0.001(2)
C32A 0.016(4) 0.0158(13) 0.0254(14) -0.0005(10) -0.002(3) -0.002(3)
C33A 0.017(3) 0.0217(9) 0.025(2) -0.0015(17) -0.0046(19) 0.001(2)
C34A 0.0131(16) 0.0218(16) 0.0258(19) -0.0020(13) -0.0026(14) 0.0018(14)
C35A 0.016(2) 0.019(3) 0.024(3) -0.0036(17) -0.0010(18) 0.001(2)
C36A 0.016(4) 0.0158(13) 0.0254(14) -0.0005(10) -0.002(3) -0.002(3)
C37A 0.017(3) 0.0217(9) 0.025(2) -0.0015(17) -0.0046(19) 0.001(2)
C38A 0.0138(16) 0.0200(16) 0.028(2) 0.0017(13) -0.0014(14) 0.0009(13)
C39A 0.0131(16) 0.0165(15) 0.0241(19) -0.0018(13) -0.0018(14) -0.0028(13)
C40A 0.0170(17) 0.0178(15) 0.0220(18) -0.0010(13) -0.0037(14) -0.0008(13)
 
_geom_special_details
;
 All esds (except the esd in the dihedral angle between two l.s. planes)
 are estimated using the full covariance matrix.  The cell esds are taken
 into account individually in the estimation of esds in distances, angles
 and torsion angles; correlations between esds in cell parameters are only
 used when they are defined by crystal symmetry.  An approximate (isotropic)
 treatment of cell esds is used for estimating esds involving l.s. planes.
;
 
loop_
 _geom_bond_atom_site_label_1
 _geom_bond_atom_site_label_2
 _geom_bond_distance
 _geom_bond_site_symmetry_2
 _geom_bond_publ_flag
C1 C9 1.388(3) . ?
C1 C2 1.421(2) . ?
C1 H1 0.9500 . ?
C2 C3 1.422(2) . ?
C2 C16A 1.49(6) . ?
C3 C10 1.397(2) . ?
C3 H3 0.9500 . ?
C4 C10 1.389(3) . ?
C4 C5 1.393(3) . ?
C4 H4 0.9500 . ?
C5 C6 1.406(3) . ?
C5 H5 0.9500 . ?
C6 C7 1.389(3) . ?
C6 H6 0.9500 . ?
C7 C8 1.395(3) . ?
C7 H7 0.9500 . ?
C8 C9 1.393(2) . ?
C8 H8 0.9500 . ?
C9 C10 1.501(2) . ?
C11A C19A 1.38(2) . ?
C11A C12A 1.42(7) . ?
C11A H11A 0.9500 . ?
C12A C13A 1.43(6) . ?
C13A C20A 1.43(3) . ?
C13A H13A 0.9500 . ?
C14A C20A 1.401(5) . ?
C14A C15A 1.41(2) . ?
C14A H14A 0.9500 . ?
C15A C16A 1.43(7) . ?
C15A H15A 0.9500 . ?
C16A C17A 1.39(6) . ?
C17A C18A 1.37(3) . ?
C17A H17A 0.9500 . ?
C18A C19A 1.385(5) . ?
C18A H18A 0.9500 . ?
C19A C20A 1.502(5) . ?
C21 C29 1.395(2) . ?
C21 C22 1.420(2) . ?
C21 H21 0.9500 . ?
C22 C23 1.418(2) . ?
C22 C36A 1.48(6) . ?
C23 C30 1.393(3) . ?
C23 H23 0.9500 . ?
C24 C30 1.391(2) . ?
C24 C25 1.393(3) . ?
C24 H24 0.9500 . ?
C25 C26 1.396(3) . ?
C25 H25 0.9500 . ?
C26 C27 1.398(3) . ?
C26 H26 0.9500 . ?
C27 C28 1.391(3) . ?
C27 H27 0.9500 . ?
C28 C29 1.396(2) . ?
C28 H28 0.9500 . ?
C29 C30 1.500(2) . ?
C31A C39A 1.38(2) . ?
C31A C32A 1.46(5) . ?
C31A H31A 0.9500 . ?
C32A C33A 1.35(6) . ?
C33A C40A 1.39(2) . ?
C33A H33A 0.9500 . ?
C34A C40A 1.399(5) . ?
C34A C35A 1.40(2) . ?
C34A H34A 0.9500 . ?
C35A C36A 1.38(5) . ?
C35A H35A 0.9500 . ?
C36A C37A 1.48(6) . ?
C37A C38A 1.39(3) . ?
C37A H37A 0.9500 . ?
C38A C39A 1.388(5) . ?
C38A H38A 0.9500 . ?
C39A C40A 1.502(5) . ?
 
loop_
 _geom_angle_atom_site_label_1
 _geom_angle_atom_site_label_2
 _geom_angle_atom_site_label_3
 _geom_angle
 _geom_angle_site_symmetry_1
 _geom_angle_site_symmetry_3
 _geom_angle_publ_flag
C9 C1 C2 109.53(15) . . ?
C9 C1 H1 125.2 . . ?
C2 C1 H1 125.2 . . ?
C1 C2 C3 107.81(15) . . ?
C1 C2 C16A 124(2) . . ?
C3 C2 C16A 128(2) . . ?
C10 C3 C2 109.43(15) . . ?
C10 C3 H3 125.3 . . ?
C2 C3 H3 125.3 . . ?
C10 C4 C5 129.22(17) . . ?
C10 C4 H4 115.4 . . ?
C5 C4 H4 115.4 . . ?
C4 C5 C6 128.82(17) . . ?
C4 C5 H5 115.6 . . ?
C6 C5 H5 115.6 . . ?
C7 C6 C5 129.32(18) . . ?
C7 C6 H6 115.3 . . ?
C5 C6 H6 115.3 . . ?
C6 C7 C8 129.26(17) . . ?
C6 C7 H7 115.4 . . ?
C8 C7 H7 115.4 . . ?
C9 C8 C7 128.77(17) . . ?
C9 C8 H8 115.6 . . ?
C7 C8 H8 115.6 . . ?
C1 C9 C8 125.64(16) . . ?
C1 C9 C10 106.85(14) . . ?
C8 C9 C10 127.50(16) . . ?
C4 C10 C3 126.49(16) . . ?
C4 C10 C9 127.09(16) . . ?
C3 C10 C9 106.37(15) . . ?
C19A C11A C12A 109(3) . . ?
C19A C11A H11A 125.6 . . ?
C12A C11A H11A 125.6 . . ?
C11A C12A C13A 110(5) . . ?
C20A C13A C12A 106(3) . . ?
C20A C13A H13A 127.2 . . ?
C12A C13A H13A 127.2 . . ?
C20A C14A C15A 129.9(11) . . ?
C20A C14A H14A 115.1 . . ?
C15A C14A H14A 115.1 . . ?
C14A C15A C16A 130(3) . . ?
C14A C15A H15A 115.0 . . ?
C16A C15A H15A 115.0 . . ?
C17A C16A C15A 124(5) . . ?
C17A C16A C2 121(5) . . ?
C15A C16A C2 115(4) . . ?
C18A C17A C16A 134(4) . . ?
C18A C17A H17A 112.9 . . ?
C16A C17A H17A 112.9 . . ?
C17A C18A C19A 129.0(14) . . ?
C17A C18A H18A 115.5 . . ?
C19A C18A H18A 115.5 . . ?
C11A C19A C18A 126.4(11) . . ?
C11A C19A C20A 107.1(11) . . ?
C18A C19A C20A 126.5(4) . . ?
C14A C20A C13A 125.7(13) . . ?
C14A C20A C19A 126.5(4) . . ?
C13A C20A C19A 107.7(13) . . ?
C29 C21 C22 109.17(15) . . ?
C29 C21 H21 125.4 . . ?
C22 C21 H21 125.4 . . ?
C23 C22 C21 108.08(16) . . ?
C23 C22 C36A 124.0(16) . . ?
C21 C22 C36A 127.8(16) . . ?
C30 C23 C22 109.48(15) . . ?
C30 C23 H23 125.3 . . ?
C22 C23 H23 125.3 . . ?
C30 C24 C25 129.06(17) . . ?
C30 C24 H24 115.5 . . ?
C25 C24 H24 115.5 . . ?
C24 C25 C26 128.62(17) . . ?
C24 C25 H25 115.7 . . ?
C26 C25 H25 115.7 . . ?
C25 C26 C27 129.49(18) . . ?
C25 C26 H26 115.3 . . ?
C27 C26 H26 115.3 . . ?
C28 C27 C26 129.39(17) . . ?
C28 C27 H27 115.3 . . ?
C26 C27 H27 115.3 . . ?
C27 C28 C29 128.78(17) . . ?
C27 C28 H28 115.6 . . ?
C29 C28 H28 115.6 . . ?
C21 C29 C28 126.35(16) . . ?
C21 C29 C30 106.73(14) . . ?
C28 C29 C30 126.84(16) . . ?
C24 C30 C23 125.70(16) . . ?
C24 C30 C29 127.77(16) . . ?
C23 C30 C29 106.52(14) . . ?
C39A C31A C32A 107(2) . . ?
C39A C31A H31A 126.7 . . ?
C32A C31A H31A 126.7 . . ?
C33A C32A C31A 110(4) . . ?
C32A C33A C40A 109(3) . . ?
C32A C33A H33A 125.3 . . ?
C40A C33A H33A 125.3 . . ?
C40A C34A C35A 130.5(12) . . ?
C40A C34A H34A 114.8 . . ?
C35A C34A H34A 114.8 . . ?
C36A C35A C34A 132(3) . . ?
C36A C35A H35A 114.1 . . ?
C34A C35A H35A 114.1 . . ?
C35A C36A C37A 124(4) . . ?
C35A C36A C22 121(3) . . ?
C37A C36A C22 116(3) . . ?
C38A C37A C36A 131(3) . . ?
C38A C37A H37A 114.5 . . ?
C36A C37A H37A 114.5 . . ?
C39A C38A C37A 130.0(12) . . ?
C39A C38A H38A 115.0 . . ?
C37A C38A H38A 115.0 . . ?
C31A C39A C38A 126.2(12) . . ?
C31A C39A C40A 107.2(12) . . ?
C38A C39A C40A 126.6(4) . . ?
C33A C40A C34A 127.0(13) . . ?
C33A C40A C39A 106.7(13) . . ?
C34A C40A C39A 126.3(4) . . ?
 
loop_
 _geom_torsion_atom_site_label_1
 _geom_torsion_atom_site_label_2
 _geom_torsion_atom_site_label_3
 _geom_torsion_atom_site_label_4
 _geom_torsion
 _geom_torsion_site_symmetry_1
 _geom_torsion_site_symmetry_2
 _geom_torsion_site_symmetry_3
 _geom_torsion_site_symmetry_4
 _geom_torsion_publ_flag
C9 C1 C2 C3 0.95(18) . . . . ?
C9 C1 C2 C16A -177(3) . . . . ?
C1 C2 C3 C10 -0.89(18) . . . . ?
C16A C2 C3 C10 177(3) . . . . ?
C10 C4 C5 C6 0.9(3) . . . . ?
C4 C5 C6 C7 0.1(3) . . . . ?
C5 C6 C7 C8 -1.4(3) . . . . ?
C6 C7 C8 C9 0.6(3) . . . . ?
C2 C1 C9 C8 178.37(15) . . . . ?
C2 C1 C9 C10 -0.64(18) . . . . ?
C7 C8 C9 C1 -177.59(17) . . . . ?
C7 C8 C9 C10 1.2(3) . . . . ?
C5 C4 C10 C3 176.87(17) . . . . ?
C5 C4 C10 C9 0.0(3) . . . . ?
C2 C3 C10 C4 -176.88(15) . . . . ?
C2 C3 C10 C9 0.50(18) . . . . ?
C1 C9 C10 C4 177.45(16) . . . . ?
C8 C9 C10 C4 -1.5(3) . . . . ?
C1 C9 C10 C3 0.09(18) . . . . ?
C8 C9 C10 C3 -178.90(16) . . . . ?
C19A C11A C12A C13A 5(5) . . . . ?
C11A C12A C13A C20A -6(5) . . . . ?
C20A C14A C15A C16A -3(5) . . . . ?
C14A C15A C16A C17A 6(8) . . . . ?
C14A C15A C16A C2 -180(2) . . . . ?
C1 C2 C16A C17A -3(6) . . . . ?
C3 C2 C16A C17A 179(3) . . . . ?
C1 C2 C16A C15A -178(3) . . . . ?
C3 C2 C16A C15A 4(6) . . . . ?
C15A C16A C17A C18A -8(8) . . . . ?
C2 C16A C17A C18A 178(3) . . . . ?
C16A C17A C18A C19A 6(5) . . . . ?
C12A C11A C19A C18A 178(3) . . . . ?
C12A C11A C19A C20A -3(3) . . . . ?
C17A C18A C19A C11A 177.3(19) . . . . ?
C17A C18A C19A C20A -1.4(15) . . . . ?
C15A C14A C20A C13A -177.7(19) . . . . ?
C15A C14A C20A C19A 1.6(15) . . . . ?
C12A C13A C20A C14A -177(3) . . . . ?
C12A C13A C20A C19A 4(3) . . . . ?
C11A C19A C20A C14A -179.8(12) . . . . ?
C18A C19A C20A C14A -0.8(6) . . . . ?
C11A C19A C20A C13A -0.4(16) . . . . ?
C18A C19A C20A C13A 178.5(11) . . . . ?
C29 C21 C22 C23 1.30(19) . . . . ?
C29 C21 C22 C36A -177(3) . . . . ?
C21 C22 C23 C30 -1.36(19) . . . . ?
C36A C22 C23 C30 177(2) . . . . ?
C30 C24 C25 C26 0.5(3) . . . . ?
C24 C25 C26 C27 1.1(3) . . . . ?
C25 C26 C27 C28 -0.1(3) . . . . ?
C26 C27 C28 C29 -1.3(3) . . . . ?
C22 C21 C29 C28 176.26(16) . . . . ?
C22 C21 C29 C30 -0.76(18) . . . . ?
C27 C28 C29 C21 -176.12(17) . . . . ?
C27 C28 C29 C30 0.3(3) . . . . ?
C25 C24 C30 C23 176.42(17) . . . . ?
C25 C24 C30 C29 -2.5(3) . . . . ?
C22 C23 C30 C24 -178.27(15) . . . . ?
C22 C23 C30 C29 0.88(19) . . . . ?
C21 C29 C30 C24 179.05(16) . . . . ?
C28 C29 C30 C24 2.1(3) . . . . ?
C21 C29 C30 C23 -0.07(18) . . . . ?
C28 C29 C30 C23 -177.07(16) . . . . ?
C39A C31A C32A C33A 4(4) . . . . ?
C31A C32A C33A C40A -4(5) . . . . ?
C40A C34A C35A C36A -4(4) . . . . ?
C34A C35A C36A C37A 3(7) . . . . ?
C34A C35A C36A C22 180(3) . . . . ?
C23 C22 C36A C35A 3(5) . . . . ?
C21 C22 C36A C35A -180(2) . . . . ?
C23 C22 C36A C37A 179(3) . . . . ?
C21 C22 C36A C37A -3(5) . . . . ?
C35A C36A C37A C38A -3(7) . . . . ?
C22 C36A C37A C38A -179(2) . . . . ?
C36A C37A C38A C39A 3(5) . . . . ?
C32A C31A C39A C38A 177(2) . . . . ?
C32A C31A C39A C40A -2(3) . . . . ?
C37A C38A C39A C31A 178(2) . . . . ?
C37A C38A C39A C40A -2.5(19) . . . . ?
C32A C33A C40A C34A -178(3) . . . . ?
C32A C33A C40A C39A 2(4) . . . . ?
C35A C34A C40A C33A -178(2) . . . . ?
C35A C34A C40A C39A 1.7(15) . . . . ?
C31A C39A C40A C33A 0.3(19) . . . . ?
C38A C39A C40A C33A -179.3(15) . . . . ?
C31A C39A C40A C34A -179.5(12) . . . . ?
C38A C39A C40A C34A 0.8(5) . . . . ?
 
_refine_diff_density_max    0.384
_refine_diff_density_min   -0.257
_refine_diff_density_rms    0.065

_shelx_res_file
;

    TAz2.res created by SHELXL-2014/7

TITL TAz2_b.res in P1
REM  Yadorkari-X generated
CELL 0.71075 5.9172 7.7819 20.7177 81.5450 87.4480 89.0230
ZERR 2.0 0.0035 0.0044 0.0119 0.0150 0.0160 0.0180
LATT 1
REM  SPGR P-1 triclinic
SFAC C H
UNIT 60 40
SIZE 0.20 0.10 0.05
TEMP -180.0
L.S. 30
FMAP 2
PLAN -20
ACTA
CONF
LIST 4
BOND $H

SHEL 5.1 0.74
EADP C11A C15A
EADP C13A C17A
EADP C12A C16A
EADP C31A C35A
EADP C33A C37A
EADP C32A C36A

WGHT    0.080600    0.172200
FVAR       4.42704
C1    1    0.681410    0.682523    0.716700    11.00000    0.01718    0.02164 =
         0.02710   -0.00254   -0.00053   -0.00086
AFIX  43
H1    2    0.814946    0.727919    0.693712    11.00000   -1.20000
AFIX   0
C2    1    0.505785    0.598185    0.689261    11.00000    0.01707    0.01696 =
         0.02582   -0.00096   -0.00354    0.00142
C3    1    0.335520    0.552506    0.739147    11.00000    0.01691    0.02089 =
         0.02787   -0.00254   -0.00355    0.00007
AFIX  43
H3    2    0.198052    0.495930    0.733782    11.00000   -1.20000
AFIX   0
C4    1    0.285189    0.574579    0.857498    11.00000    0.01932    0.02282 =
         0.02971   -0.00141   -0.00142    0.00116
AFIX  43
H4    2    0.143415    0.518937    0.857777    11.00000   -1.20000
AFIX   0
C5    1    0.346608    0.615333    0.917569    11.00000    0.02682    0.02577 =
         0.02480   -0.00137    0.00114    0.00359
AFIX  43
H5    2    0.242176    0.582057    0.953202    11.00000   -1.20000
AFIX   0
C6    1    0.542092    0.698993    0.932619    11.00000    0.03024    0.02665 =
         0.02419   -0.00429   -0.00544    0.00414
AFIX  43
H6    2    0.551263    0.714151    0.977094    11.00000   -1.20000
AFIX   0
C7    1    0.723808    0.762698    0.891814    11.00000    0.02465    0.02441 =
         0.02772   -0.00588   -0.00691    0.00096
AFIX  43
H7    2    0.837721    0.817515    0.912184    11.00000   -1.20000
AFIX   0
C8    1    0.762899    0.757682    0.825230    11.00000    0.02012    0.02148 =
         0.02793   -0.00202   -0.00481    0.00014
AFIX  43
H8    2    0.900217    0.808387    0.806651    11.00000   -1.20000
AFIX   0
C9    1    0.627805    0.688366    0.782273    11.00000    0.01835    0.01755 =
         0.02835   -0.00159   -0.00353    0.00221
C10   1    0.401722    0.603720    0.797268    11.00000    0.01973    0.01833 =
         0.02715   -0.00137   -0.00348    0.00309
PART -1
SIMU 0.008 C11A > C20A
C11A  1    0.672076    0.526165    0.404358    10.50000    0.01712    0.01958 =
         0.02395   -0.00435    0.00006   -0.00046
AFIX  43
H11A  2    0.805227    0.573417    0.381701    10.50000   -1.20000
AFIX   0
C12A  1    0.500353    0.437518    0.377010    10.50000    0.01688    0.01816 =
         0.02481   -0.00250   -0.00284    0.00154
C13A  1    0.314756    0.398703    0.423388    10.50000    0.01841    0.01802 =
         0.02778   -0.00300   -0.00315    0.00135
AFIX  43
H13A  2    0.174238    0.348904    0.416218    10.50000   -1.20000
AFIX   0
C14A  1    0.260883    0.429940    0.542517    10.50000    0.01342    0.02027 =
         0.02839   -0.00156    0.00143   -0.00229
AFIX  43
H14A  2    0.120609    0.372343    0.542524    10.50000   -1.20000
AFIX   0
C15A  1    0.312019    0.481451    0.602489    10.50000    0.01712    0.01958 =
         0.02395   -0.00435    0.00006   -0.00046
AFIX  43
H15A  2    0.197212    0.459059    0.636082    10.50000   -1.20000
AFIX   0
C16A  1    0.509918    0.562240    0.620702    10.50000    0.01688    0.01816 =
         0.02481   -0.00250   -0.00284    0.00154
C17A  1    0.687740    0.619236    0.577017    10.50000    0.01841    0.01802 =
         0.02778   -0.00300   -0.00315    0.00135
AFIX  43
H17A  2    0.796718    0.683211    0.595658    10.50000   -1.20000
AFIX   0
C18A  1    0.740420    0.603522    0.513105    10.50000    0.01561    0.01636 =
         0.02914   -0.00019   -0.00149   -0.00218
AFIX  43
H18A  2    0.883682    0.647512    0.496590    10.50000   -1.20000
AFIX   0
C19A  1    0.613755    0.532363    0.469191    10.50000    0.01918    0.01583 =
         0.02360   -0.00302   -0.00074    0.00103
C20A  1    0.385263    0.450636    0.482804    10.50000    0.01642    0.01491 =
         0.02784   -0.00217   -0.00324   -0.00041
PART 0
C21   1    0.191660    0.049255    0.732878    11.00000    0.01582    0.02163 =
         0.02525   -0.00263   -0.00010   -0.00003
AFIX  43
H21   2    0.328381   -0.008349    0.722465    11.00000   -1.20000
AFIX   0
C22   1    0.015034    0.097661    0.689391    11.00000    0.01836    0.01870 =
         0.02498    0.00006   -0.00110   -0.00151
C23   1   -0.156293    0.183813    0.722950    11.00000    0.01795    0.02111 =
         0.02819   -0.00171   -0.00338    0.00173
AFIX  43
H23   2   -0.292034    0.231640    0.704673    11.00000   -1.20000
AFIX   0
C24   1   -0.223814    0.257388    0.834572    11.00000    0.01940    0.02015 =
         0.03193   -0.00366   -0.00036   -0.00127
AFIX  43
H24   2   -0.361470    0.312288    0.820604    11.00000   -1.20000
AFIX   0
C25   1   -0.179469    0.258200    0.900006    11.00000    0.02441    0.02437 =
         0.02726   -0.00673    0.00410   -0.00173
AFIX  43
H25   2   -0.291402    0.312605    0.924650    11.00000   -1.20000
AFIX   0
C26   1    0.007535    0.189713    0.934173    11.00000    0.03268    0.02539 =
         0.02400   -0.00405   -0.00096   -0.00488
AFIX  43
H26   2    0.003580    0.202272    0.979133    11.00000   -1.20000
AFIX   0
C27   1    0.199865    0.105319    0.911928    11.00000    0.02526    0.02644 =
         0.02797   -0.00233   -0.00728   -0.00250
AFIX  43
H27   2    0.307632    0.069134    0.943943    11.00000   -1.20000
AFIX   0
C28   1    0.256269    0.066670    0.849721    11.00000    0.02219    0.02225 =
         0.02792   -0.00221   -0.00458   -0.00099
AFIX  43
H28   2    0.398285    0.010093    0.844963    11.00000   -1.20000
AFIX   0
C29   1    0.132460    0.099758    0.793336    11.00000    0.01782    0.01889 =
         0.02748   -0.00148   -0.00228   -0.00249
C30   1   -0.094759    0.187454    0.786839    11.00000    0.01865    0.01834 =
         0.02799   -0.00264   -0.00153   -0.00179
PART -1
SIMU 0.008 C31A > C40A
C31A  1    0.173609   -0.104592    0.419413    10.50000    0.01615    0.01899 =
         0.02409   -0.00361   -0.00097    0.00058
AFIX  43
H31A  2    0.311925   -0.158339    0.407851    10.50000   -1.20000
AFIX   0
C32A  1   -0.017783   -0.059547    0.377588    10.50000    0.01623    0.01580 =
         0.02543   -0.00054   -0.00250   -0.00189
C33A  1   -0.179502    0.025378    0.409358    10.50000    0.01690    0.02173 =
         0.02531   -0.00152   -0.00458    0.00089
AFIX  43
H33A  2   -0.315408    0.073189    0.391181    10.50000   -1.20000
AFIX   0
C34A  1   -0.238973    0.103452    0.521601    10.50000    0.01311    0.02178 =
         0.02577   -0.00204   -0.00257    0.00185
AFIX  43
H34A  2   -0.383315    0.149177    0.509391    10.50000   -1.20000
AFIX   0
C35A  1   -0.184323    0.118889    0.585619    10.50000    0.01615    0.01899 =
         0.02409   -0.00361   -0.00097    0.00058
AFIX  43
H35A  2   -0.294755    0.179717    0.608447    10.50000   -1.20000
AFIX   0
C36A  1   -0.000142    0.062166    0.621515    10.50000    0.01623    0.01580 =
         0.02543   -0.00054   -0.00250   -0.00189
C37A  1    0.198217   -0.027063    0.595122    10.50000    0.01690    0.02173 =
         0.02531   -0.00152   -0.00458    0.00089
AFIX  43
H37A  2    0.315855   -0.054094    0.624822    10.50000   -1.20000
AFIX   0
C38A  1    0.241739   -0.078139    0.534146    10.50000    0.01379    0.01999 =
         0.02779    0.00174   -0.00137    0.00094
AFIX  43
H38A  2    0.380563   -0.139215    0.529602    10.50000   -1.20000
AFIX   0
C39A  1    0.113785   -0.053709    0.478907    10.50000    0.01305    0.01650 =
         0.02414   -0.00177   -0.00183   -0.00279
C40A  1   -0.115379    0.031605    0.472762    10.50000    0.01704    0.01780 =
         0.02200   -0.00098   -0.00367   -0.00085
PART 0

HKLF 4 1 1 0 0 0 1 0 0 0 1

REM  TAz2_b.res in P1
REM R1 =  0.0614 for    3180 Fo > 4sig(Fo)  and  0.1002 for all    4849 data
REM    325 parameters refined using    132 restraints

END

WGHT      0.0806      0.1722

REM Highest difference peak  0.384,  deepest hole -0.257,  1-sigma level  0.065
Q1    1   0.1570 -0.0923  0.4527  11.00000  0.05    0.38
Q2    1   0.5005  0.5873  0.6544  11.00000  0.05    0.38
Q3    1   0.1551  0.0454  0.7714  11.00000  0.05    0.37
Q4    1   0.3365  0.4008  0.4583  11.00000  0.05    0.37
Q5    1   0.0021  0.0754  0.6552  11.00000  0.05    0.36
Q6    1   0.6682  0.5337  0.4366  11.00000  0.05    0.36
Q7    1   0.6777  0.5560  0.4909  11.00000  0.05    0.35
Q8    1   0.1912 -0.0615  0.5031  11.00000  0.05    0.35
Q9    1   0.3092  0.6344  0.8800  11.00000  0.05    0.33
Q10   1   0.3319  0.5856  0.7718  11.00000  0.05    0.33
Q11   1  -0.1775  0.0362  0.4424  11.00000  0.05    0.33
Q12   1   0.5087  0.6543  0.7975  11.00000  0.05    0.32
Q13   1  -0.1501  0.2519  0.8610  11.00000  0.05    0.32
Q14   1   0.0958  0.0495  0.7092  11.00000  0.05    0.31
Q15   1   0.3650  0.6025  0.8350  11.00000  0.05    0.31
Q16   1   0.4299  0.5155  0.6137  11.00000  0.05    0.30
Q17   1   0.6599  0.6990  0.7502  11.00000  0.05    0.29
Q18   1  -0.1610  0.1925  0.7560  11.00000  0.05    0.29
Q19   1   0.6018  0.6484  0.6982  11.00000  0.05    0.29
Q20   1  -0.1639  0.2004  0.8175  11.00000  0.05    0.29
;
_shelx_res_checksum   68237

_shelx_hkl_file
;
   0   0   2-9.51669 8.61449   2
   0   0  -2-4.19972 10.2684   3
   0   0   2-5.10057 9.04531   1
   0   0  -2-20.3798 15.7590   1
   0   0   2-1.65021 12.5378   3
   0   0  -2-5.03527 12.7128   2
   0   0  -3 51619.2 385.410   2
   0   0   3 48427.9 364.253   4
   0   0  -3 53310.6 423.501   1
   0   0   3 52424.3 435.452   3
   0   0   4 2464.19 98.0851   4
   0   0   4 2500.25 115.649   3
   0   0  -4 2247.68 99.1166   2
   0   0  -4 2186.17 111.430   3
   0   0   4 2364.18 110.688   1
   0   0  -4 2453.56 110.001   1
   0   0  -4 2602.65 99.1531   4
   0   0   4 2448.94 102.277   2
   0   0  -5 5603.03 160.931   4
   0   0   5 5692.30 167.627   4
   0   0   5 5773.72 187.696   1
   0   0   5 5378.70 183.696   3
   0   0  -5 5593.95 188.692   3
   0   0   5 5145.25 162.130   2
   0   0  -5 5476.09 166.919   2
   0   0  -5 5614.26 182.871   1
   0   0  -6 32463.0 442.920   2
   0   0  -6 33326.9 489.458   3
   0   0   6 32485.5 473.979   1
   0   0   6 32705.1 433.886   4
   0   0   6 32867.4 445.125   2
   0   0  -6 32730.3 417.283   4
   0   0  -6 33899.2 492.091   1
   0   0   6 32832.0 490.583   3
   0   0  -7 829.642 81.6620   2
   0   0   7 637.347 82.7729   1
   0   0  -7 719.063 74.3455   4
   0   0   7 729.526 77.5156   4
   0   0  -7 844.956 93.5885   1
   0   0   7 776.540 84.5560   2
   0   0  -7 588.038 83.7584   3
   0   0   7 731.871 94.2294   3
   0   0   8 5370.11 209.844   2
   0   0   8 4843.62 215.273   1
   0   0   8 5241.61 199.339   4
   0   0  -8 5069.62 226.978   3
   0   0  -8 5050.66 225.463   1
   0   0  -8 4942.50 190.019   4
   0   0   8 5448.11 235.234   3
   0   0  -8 4907.53 201.367   2
   0   0   9 29293.8 496.404   4
   0   0  -9 29527.7 485.596   4
   0   0   9 29545.5 511.160   2
   0   0   9 29273.6 559.158   1
   0   0  -9 30047.5 583.626   3
   0   0  -9 29359.6 517.435   2
   0   0  -9 29818.7 569.594   1
   0   0   9 29678.7 571.311   3
   0   0 -10 27289.0 495.033   4
   0   0  10 26973.7 572.786   1
   0   0  10 27983.3 532.695   2
   0   0  10 28156.7 507.068   4
   0   0 -10 28589.5 536.651   2
   0   0 -11 1031.41 107.209   4
   0   0 -11 1060.79 131.599   3
   0   0 -11 862.106 110.004   2
   0   0  11 922.569 110.300   2
   0   0  11 893.697 121.733   1
   0   0  11 870.643 102.662   4
   0   0 -12-1.60793 62.7681   3
   0   0 -12 71.6100 54.1521   4
   0   0  12 45.4978 45.7546   4
   0   0  12 17.6820 54.9719   1
   0   0  12 39.7060 58.5818   2
   0   0  13 4197.25 264.019   1
   0   0  13 4625.77 254.962   2
   0   0 -13 4711.36 288.090   3
   0   0 -13 4304.08 228.020   4
   0   0 -14 1530.78 173.215   3
   0   0  14 1232.67 153.741   1
   0   0  14 1375.19 150.060   2
   0   0 -14 1334.41 140.186   4
   0   0  15 3997.91 259.229   2
   0   0 -15 3774.65 230.317   4
   0   0 -15 3257.55 263.276   3
   0   0  15 4089.89 283.305   1
   0   0  16 5913.66 316.501   2
   0   0  16 4887.34 324.171   1
   0   0 -16 5517.91 347.773   3
   0   0 -16 5757.98 294.066   4
   0   0 -17 1026.80 137.007   4
   0   0  17 1190.83 156.314   2
   0   0  17 1209.16 177.044   1
   0   0 -17 1159.01 173.492   3
   0   0  18 615.218 138.796   1
   0   0 -18 770.564 156.657   3
   0   0 -18 725.706 124.037   4
   0   0  18 926.829 157.088   2
   0   0 -19 9568.88 505.642   3
   0   0  19 10122.0 456.861   2
   0   0 -19 9877.91 424.451   4
   0   0 -20 1094.17 153.453   4
   0   0  20 1404.66 205.744   1
   0   0  20 1095.89 164.945   2
   0   0 -20 787.465 172.456   3
   0   0 -21 653.558 164.051   3
   0   0  21 486.990 122.404   2
   0   0 -21 346.667 99.7891   4
   0   0  21 665.818 170.671   1
   0   0  22 171.275 104.511   1
   0   0  22 326.300 115.645   2
   0   0 -22 66.2351 89.3780   3
   0   0 -22 93.4304 67.3370   4
   0   0 -23 70.2432 114.826   3
   0   0  23 60.6351 82.2296   2
   0   0 -23 248.337 108.237   4
   0   0  23-61.7981 128.280   1
   0   0  24 209.056 140.127   1
   0   0 -24-16.1456 84.1490   4
   0   0 -24 58.2093 107.612   3
   0   0  24 149.446 105.960   2
   0   0  25 433.140 142.355   2
   0   0 -25 126.066 124.746   3
   0   0  25 422.845 151.936   1
   0   0  26 183.698 131.738   1
   0   0  26 26.8462 95.3879   2
   0   0 -26 193.185 150.629   3
   0   0 -27 2.28935 117.262   3
   0   0  27 153.300 129.780   2
   0   0  27-63.7090 109.726   1
   0   0  28 49.7625 135.469   1
   0   0 -28 67.6300 122.126   3
   0  -1  27 129.991 137.226   1
   0   1 -27 125.129 134.259   3
   0  -1  26 429.873 170.655   1
   0  -1  26 117.677 98.5073   2
   0   1 -26 323.473 156.829   3
   0  -1  25 41.2458 120.012   1
   0   1 -25-89.6199 136.861   3
   0  -1  25-71.3024 105.651   2
   0  -1  24-20.8641 123.995   1
   0  -1  24 52.4309 101.087   2
   0   1 -24 122.794 120.302   3
   0   1 -23 129.898 84.2809   4
   0  -1  23 38.0190 92.7720   2
   0  -1  23 348.594 151.359   1
   0   1 -23 12.6082 107.865   3
   0   1 -22 179.820 138.875   3
   0  -1  22 222.031 132.735   1
   0  -1  22 62.1912 91.8115   2
   0   1 -22 23.5451 68.8163   4
   0  -1  21-0.49605 76.0286   2
   0   1 -21 100.408 104.543   3
   0  -1  21 60.0670 95.0934   1
   0   1 -21 35.3197 80.1981   4
   0   1 -20 900.875 195.573   3
   0   1 -20 437.978 107.568   4
   0  -1  20 495.931 125.991   2
   0  -1  20 569.350 142.396   1
   0  -1  19 1381.62 203.203   1
   0  -1  19 2230.87 224.157   2
   0   1 -19 1260.81 209.975   3
   0   1 -19 1873.08 188.434   4
   0  -1  18 883.157 173.039   1
   0  -1  18 619.823 115.748   2
   0   1 -18 489.263 97.2156   4
   0   1 -18 645.682 153.710   3
   0   1 -17 1796.54 223.448   3
   0   1 -17 1706.78 169.820   4
   0  -1  17 1674.93 184.046   2
   0  -1  17 1228.46 185.343   1
   0   1 -16 2820.22 203.573   4
   0  -1  16 2198.01 231.437   1
   0   1 -16 2605.71 257.908   3
   0  -1  16 2290.35 206.009   2
   0   1 -15 183.533 105.247   3
   0   1 -15 242.485 72.9390   4
   0  -1  15 122.528 65.1647   2
   0  -1  15 340.150 104.367   1
   0  -1  14 250.482 78.0432   2
   0   1 -14 145.577 86.4555   3
   0   1 -14 226.786 68.9852   4
   0  -1  14 270.646 94.0878   1
   0   1 -13 234.559 98.3700   3
   0  -1  13 80.6634 51.2506   2
   0   1 -13 145.032 53.1854   4
   0  -1  13 78.9349 71.8301   1
   0  -1  13 164.171 57.2307   4
   0  -1  12 102.583 65.2254   2
   0   1 -12 164.140 60.1346   4
   0   1 -12 103.855 71.7949   3
   0  -1  12 92.4149 62.7129   1
   0  -1  12 142.121 50.0813   4
   0   1 -11 450.607 104.167   3
   0   1 -11 369.206 74.0834   4
   0   1 -11 471.375 82.6236   2
   0  -1  11 488.072 100.900   1
   0  -1  11 385.406 75.6962   4
   0  -1  11 426.271 88.6968   2
   0   1 -10 1240.43 140.927   3
   0  -1  10 1481.60 121.043   4
   0   1 -10 1284.98 125.824   2
   0   1 -10 1410.91 119.903   4
   0  -1  10 1174.42 116.841   2
   0  -1  10 1323.60 142.682   1
   0  -1   9 291.590 68.1017   2
   0  -1   9 412.501 63.2681   4
   0   1  -9 477.951 97.5131   3
   0   1  -9 475.035 72.3524   4
   0  -1   9 349.077 79.9426   1
   0   1  -9 437.927 77.7634   2
   0   1  -8 266.444 72.3199   3
   0  -1   8 179.280 54.2437   3
   0   1  -8 362.723 63.7899   4
   0   1  -8 336.328 59.7036   2
   0  -1   8 403.620 74.1863   2
   0  -1   8 296.376 78.1520   1
   0   1  -8 355.657 76.9670   1
   0  -1   8 295.374 55.5425   4
   0  -1   7 64.0946 37.4299   2
   0   1  -7 4.51778 42.5790   1
   0   1  -7-3.33271 39.9116   4
   0  -1   7 47.9184 45.0420   1
   0   1  -7 65.9543 36.7065   2
   0  -1   7 80.2989 38.1560   4
   0   1  -7 145.001 63.8088   3
   0  -1   7 28.6738 50.6046   3
   0   1  -6-40.1219 38.3245   4
   0  -1   6 138.169 64.0695   1
   0   1  -6 24.8992 36.2942   2
   0  -1   6 37.6794 44.8069   3
   0   1  -6 46.8904 46.2548   3
   0   1  -6-21.1047 46.0243   1
   0  -1   6-28.5779 43.8917   2
   0  -1   6-55.4990 36.5278   4
   0   1  -5 27.8923 43.8416   3
   0  -1   5 24.4891 39.1852   2
   0  -1   5-20.9315 52.1140   1
   0   1  -5-31.4009 34.6543   2
   0  -1   5 41.2414 47.4357   3
   0   1  -5-64.8510 40.4225   4
   0   1  -5 14.5975 39.8784   1
   0  -1   5 6.83873 28.4543   4
   0   1  -4-51.7987 46.7429   3
   0  -1   4-69.6412 42.2163   2
   0  -1   4-53.6553 44.1186   3
   0  -1   4 4.77257 29.4185   4
   0   1  -4 6.74901 39.1827   2
   0   1  -4-71.8391 48.2464   1
   0  -1   4-67.6057 38.3997   4
   0  -1   4-13.0447 38.6359   1
   0  -1   3 75.3542 30.4462   4
   0   1  -3 169.088 52.3633   3
   0  -1   3 155.996 36.6771   4
   0   1  -3 151.066 42.0856   2
   0   1  -3 228.189 51.0697   1
   0   1  -3 91.1300 35.8826   2
   0  -1   3 147.658 46.6937   3
   0  -1   3 96.9356 44.2771   1
   0   1  -2 39.8190 31.5733   1
   0  -1   2-27.1753 25.8129   4
   0  -1   2 94.1867 32.8218   1
   0  -1   2-23.3832 29.5796   2
   0   1  -2 10.1958 25.2991   3
   0   1  -2-30.8881 31.7975   2
   0   1  -2-53.1931 28.6447   4
   0  -1   2 13.5314 29.6329   3
   0  -1   1 41.1475 22.9328   3
   0  -1   1 73.2683 27.4634   2
   0   1  -1-25.2257 20.3143   3
   0   1  -1 49.3953 25.7351   4
   0  -1   1 90.1624 29.8183   4
   0   1  -1 51.9399 26.6596   1
   0   1  -1 14.7077 21.9147   2
   0  -1   1-20.2252 17.5620   1
   0   1   0-8.69067 18.6929   2
   0  -1   0 66.2140 23.3050   3
   0  -1   0 55.3572 28.4835   2
   0  -1   0-24.7850 19.5518   4
   0  -1   0-2.34286 10.5830   1
   0   1   0 75.9743 23.3199   4
   0   1   0-8.22569 12.4980   3
   0   1   0 44.6670 23.8327   1
   0  -1  -1 12.2650 26.2313   2
   0   1   1 9.63122 16.6416   2
   0  -1  -1 14.7214 21.3358   3
   0   1   1-11.5515 21.0081   1
   0  -1  -1-4.36349 19.3259   4
   0  -1  -1 3.92449 10.6203   1
   0   1   1 27.4358 26.1832   4
   0   1   1-7.53993 12.8281   3
   0   1   2 103.209 27.5617   1
   0  -1  -2-3.51989 26.5089   2
   0  -1  -2 119.107 28.3597   3
   0  -1  -2 12.2820 15.1163   1
   0   1   2 55.7508 29.9773   4
   0   1   2-24.8335 20.3741   3
   0  -1  -2-14.1199 23.9436   4
   0   1   2-16.8486 23.5729   2
   0  -1  -3-9.86179 31.4617   4
   0   1   3-41.0996 26.3263   1
   0   1   3 77.6798 38.9337   2
   0  -1  -3-5.20873 26.6501   3
   0  -1  -3 29.2421 32.6262   2
   0  -1  -3-20.1307 26.1410   1
   0   1   3 35.1008 34.5789   4
   0   1   3-5.62583 27.7254   3
   0   1   4-39.6429 38.6135   2
   0   1   4 51.7386 38.4306   3
   0  -1  -4 46.6272 44.0435   4
   0   1   4 45.9149 38.9206   1
   0  -1  -4 9.82545 35.1659   3
   0  -1  -4-29.5648 33.0442   1
   0  -1  -4 19.5947 35.7840   2
   0   1   4-5.06304 38.7544   4
   0  -1  -5 38.1966 40.6721   3
   0  -1  -5-1.03639 33.6746   1
   0   1   5-8.82355 39.8976   3
   0   1   5-33.1959 40.5027   1
   0  -1  -5 19.2233 41.6787   2
   0   1   5-15.5139 42.6715   2
   0   1   5-9.24977 37.6980   4
   0  -1  -5-28.2212 42.2861   4
   0   1   6-11.7800 38.4331   4
   0   1   6 41.0160 47.6354   2
   0  -1  -6-33.0058 37.6934   2
   0   1   6-8.93934 39.4434   1
   0   1   6-5.73492 42.3328   3
   0  -1  -6-4.67524 38.9871   4
   0  -1  -6-60.6848 36.7170   1
   0  -1  -6 33.1922 39.8530   3
   0   1   7 42.2071 42.1799   2
   0  -1  -7-37.3240 44.2442   3
   0   1   7 41.8777 45.3602   4
   0   1   7-44.9140 49.4664   3
   0  -1  -7-6.83559 36.5282   1
   0   1   7-50.1273 50.0940   1
   0  -1  -7 10.1062 43.8158   2
   0  -1  -7 30.1091 49.5736   4
   0  -1  -8-47.3565 45.8390   3
   0   1   8-84.9928 54.5497   1
   0   1   8 71.8725 45.2047   4
   0   1   8 17.2113 52.6175   2
   0  -1  -8-28.7518 51.1613   4
   0   1   8-17.6001 49.3099   3
   0  -1  -8 29.4735 42.2565   2
   0  -1  -8-59.5711 48.8920   1
   0   1   9 80.6112 52.3249   4
   0   1   9-21.3221 50.1077   3
   0  -1  -9 44.0412 51.7360   3
   0  -1  -9-24.7382 47.9453   2
   0  -1  -9-64.3585 58.9484   1
   0  -1  -9 52.0252 51.4668   4
   0   1   9-14.8107 51.3920   1
   0   1   9-6.29217 47.6943   2
   0  -1 -10 103.728 69.0283   3
   0   1  10 0.48057 51.4740   3
   0   1  10 52.2735 53.7858   1
   0   1  10 59.4259 49.0886   2
   0   1  10 223.869 73.2803   4
   0  -1 -10 31.0129 52.0832   1
   0  -1 -10-17.4198 46.4671   2
   0  -1 -10 104.492 63.2258   4
   0   1  11 7.73396 47.7767   2
   0  -1 -11-20.0984 49.1580   2
   0  -1 -11 39.2968 50.8546   4
   0  -1 -11-72.4371 54.5111   3
   0   1  11 51.1898 53.3221   1
   0   1  11-24.8059 49.7655   4
   0   1  12-44.2820 54.2882   1
   0  -1 -12-0.59723 55.2448   3
   0  -1 -12 35.2136 50.1746   4
   0   1  12-16.3474 53.5477   2
   0  -1 -13 40.1043 57.4653   3
   0  -1 -13 105.394 48.7180   4
   0   1  13 3.35756 52.1190   1
   0   1  13 186.729 81.6766   2
   0   1  14 76.1888 66.2693   2
   0  -1 -14 94.8388 88.0684   3
   0   1  14 73.9057 67.9979   1
   0  -1 -14 36.6797 50.8648   4
   0  -1 -15 516.989 107.219   3
   0   1  15 486.510 106.214   2
   0   1  15 522.501 117.188   1
   0  -1 -15 368.284 82.3113   4
   0  -1 -16 739.087 120.093   4
   0   1  16 624.320 122.595   2
   0  -1 -16 521.496 116.627   3
   0   1  16 366.985 108.673   1
   0   1  17 171.159 85.3404   2
   0  -1 -17 329.676 90.8550   4
   0  -1 -17 242.832 112.892   3
   0   1  17 296.405 99.7804   1
   0   1  18 554.839 125.796   1
   0   1  18 324.210 105.514   2
   0  -1 -18 583.662 113.954   4
   0  -1 -18 429.173 124.863   3
   0  -1 -19 376.967 124.839   3
   0  -1 -19 359.273 104.707   4
   0   1  19 434.207 126.635   1
   0   1  19 271.998 91.6129   2
   0  -1 -20-48.3091 79.3370   4
   0   1  20 19.1254 76.0132   1
   0  -1 -20-24.6842 89.4714   3
   0   1  20 209.830 108.196   2
   0  -1 -21 75.6380 77.5538   4
   0   1  21 62.7511 73.8000   2
   0  -1 -21-94.3510 104.260   3
   0   1  21 16.1275 99.5565   1
   0  -1 -22 243.678 124.395   3
   0  -1 -22 71.7152 82.0705   4
   0   1  22-126.093 103.050   1
   0   1  22 163.868 104.126   2
   0  -1 -23 139.719 112.899   3
   0   1  23 34.4266 92.9340   1
   0  -1 -23 187.130 111.312   4
   0   1  23-8.66465 83.7072   2
   0  -1 -24-87.7781 120.139   3
   0   1  24 1.06612 101.560   1
   0  -1 -24 103.263 96.1043   4
   0   1  24 132.914 106.590   2
   0   1  25 204.591 130.606   1
   0  -1 -25 327.725 123.206   4
   0   1  25 160.966 95.9337   2
   0  -1 -25 448.642 155.914   3
   0   1  26 211.907 128.645   2
   0  -1 -26 283.211 171.043   3
   0   1  26 114.193 129.433   1
   0  -1 -27 254.399 160.365   3
   0   1  27 71.7088 112.142   2
   0   1  27-168.204 150.202   1
   0  -1 -28 1617.96 315.575   3
   0   1  28 1148.00 255.837   1
   0   1  29 133.715 145.814   1
   0   2 -26 890.000 218.112   3
   0  -2  26 683.357 222.180   1
   0  -2  25 95.3491 138.840   1
   0   2 -25 250.750 135.505   2
   0   2 -25 164.314 144.268   3
   0   2 -24 89.8387 96.1099   2
   0   2 -24 317.021 161.712   3
   0  -2  24 88.5811 128.898   1
   0  -2  23 607.777 177.192   1
   0   2 -23 1211.18 249.340   3
   0   2 -22 428.100 157.069   3
   0  -2  22 285.120 128.028   1
   0   2 -21 611.245 181.903   3
   0  -2  21 375.319 105.686   4
   0  -2  21 575.570 165.338   1
   0  -2  21 569.794 133.096   2
   0  -2  20 58.9089 90.0641   2
   0  -2  20 117.428 104.645   1
   0  -2  20-125.493 85.7870   4
   0   2 -20 106.516 89.0652   3
   0   2 -19 133.144 104.813   3
   0  -2  19 27.1055 78.7408   2
   0  -2  19 121.498 72.7495   4
   0  -2  19 324.207 132.086   1
   0  -2  18 9.81576 69.6622   2
   0   2 -18 44.4495 84.8887   3
   0  -2  18 126.093 98.1430   1
   0  -2  18 51.2024 60.4699   4
   0  -2  17 11907.9 441.378   4
   0  -2  17 11697.4 480.802   2
   0  -2  17 11261.8 546.176   1
   0   2 -17 10098.2 520.610   3
   0  -2  16 1261.15 193.157   1
   0   2 -16 988.107 173.249   3
   0  -2  16 1297.88 157.163   2
   0   2 -15 224.958 104.698   3
   0  -2  15 371.075 114.857   1
   0  -2  15 262.216 88.4696   2
   0  -2  14 426.502 95.3416   2
   0   2 -14 392.881 121.360   3
   0  -2  14 339.693 83.8862   4
   0  -2  14 508.027 120.861   1
   0  -2  13 7474.37 385.989   1
   0  -2  13 7698.67 344.202   2
   0   2 -13 7925.59 400.186   3
   0  -2  13 7497.12 308.120   4
   0  -2  12 1413.27 130.399   4
   0  -2  12 1472.15 155.141   2
   0   2 -12 1274.35 165.046   3
   0  -2  12 1465.56 169.839   1
   0  -2  12 1469.92 140.305   4
   0  -2  11 5783.05 321.532   1
   0  -2  11 6303.51 292.673   2
   0   2 -11 6577.12 336.520   3
   0  -2  11 6273.46 263.696   4
   0  -2  11 6192.59 253.261   4
   0  -2  10 163.369 63.7121   4
   0   2 -10 284.574 92.2081   3
   0  -2  10 72.6404 41.5942   4
   0  -2  10 273.468 80.6471   1
   0   2  -9 1964.06 152.753   2
   0  -2   9 1847.99 134.315   4
   0   2  -9 2003.61 165.729   2
   0  -2   9 2164.13 141.505   4
   0  -2   9 1781.41 169.048   1
   0   2  -9 2070.34 184.951   3
   0   2  -8 10881.3 348.415   2
   0   2  -8 10876.3 381.594   3
   0   2  -8 10713.0 335.897   2
   0  -2   8 11059.8 307.707   4
   0  -2   8 11032.5 300.113   4
   0  -2   8 11006.3 381.217   1
   0   2  -7 6081.41 244.311   2
   0  -2   7 6101.09 225.590   4
   0   2  -7 5988.02 269.862   3
   0  -2   7 5731.92 262.598   3
   0  -2   7 6261.19 281.968   1
   0  -2   7 5988.34 215.810   4
   0   2  -7 5893.52 248.145   2
   0   2  -6 420.860 81.7905   3
   0  -2   6 279.633 57.3946   4
   0   2  -6 206.576 61.5025   1
   0  -2   6 240.164 63.4850   3
   0  -2   6 253.434 67.3085   1
   0   2  -6 258.693 62.6051   2
   0   2  -6 180.910 57.2170   2
   0  -2   6 329.799 60.7541   4
   0  -2   5 1785.32 135.797   3
   0   2  -5 2088.14 147.028   3
   0  -2   5 1936.09 119.187   4
   0   2  -5 2029.59 135.214   2
   0   2  -5 2128.46 147.658   1
   0  -2   5 2023.40 144.092   1
   0  -2   5 2013.04 120.769   4
   0   2  -5 1811.15 132.024   2
   0   2  -4 3165.77 146.185   4
   0  -2   4 3221.01 160.133   2
   0  -2   4 3144.26 145.159   4
   0   2  -4 3302.75 173.812   3
   0   2  -4 3202.87 161.428   2
   0  -2   4 3328.81 169.868   3
   0  -2   4 3496.01 180.083   1
   0   2  -4 3527.38 177.616   1
   0  -2   3 268.078 54.3230   2
   0  -2   3 267.936 58.4991   1
   0   2  -3 236.820 55.1798   2
   0   2  -3 269.856 65.8550   1
   0   2  -3 247.840 62.1486   3
   0  -2   3 318.587 59.0797   4
   0  -2   3 403.853 66.9709   3
   0   2  -3 207.487 46.5252   4
   0  -2   2 3693.15 162.094   3
   0  -2   2 3838.61 165.953   2
   0  -2   2 3632.09 151.686   4
   0   2  -2 3628.11 165.551   1
   0   2  -2 3556.12 158.657   2
   0   2  -2 3576.03 151.958   4
   0   2  -2 3702.62 156.501   3
   0  -2   2 3706.43 165.482   1
   0  -2   1 658670. 2045.99   4
   0   2  -1 663132. 1916.96   3
   0  -2   1 686366. 2055.84   1
   0   2  -1 666315. 2132.61   2
   0  -2   1 671977. 1958.40   3
   0   2  -1 672848. 2066.84   1
   0   2  -1 685770. 2012.01   4
   0  -2   1 673942. 2105.80   2
   0  -2   0 9137.46 254.469   2
   0  -2   0 8700.43 213.022   3
   0  -2   0 8247.64 229.506   4
   0   2   0 8631.48 236.332   4
   0   2   0 8220.19 222.846   1
   0  -2   0 9226.08 232.240   1
   0   2   0 8590.56 252.129   2
   0   2   0 8944.26 214.751   3
   0  -2  -1 11131.8 227.945   3
   0  -2  -1 12158.0 261.081   1
   0   2   1 10707.6 282.916   2
   0   2   1 11979.0 278.742   4
   0  -2  -1 11295.5 270.624   4
   0   2   1 11909.3 233.746   3
   0   2   1 11431.6 251.737   1
   0  -2  -1 12168.1 292.252   2
   0  -2  -2 14734.5 264.148   3
   0  -2  -2 15330.9 288.926   1
   0  -2  -2 14698.2 322.081   4
   0   2   2 15857.1 329.575   4
   0   2   2 15519.2 265.239   3
   0  -2  -2 16033.9 339.224   2
   0   2   2 15498.5 338.519   2
   0   2   2 15355.3 292.963   1
   0  -2  -3 1400.20 97.3461   1
   0   2   3 1430.88 106.955   4
   0   2   3 1625.16 91.7150   3
   0   2   3 1443.52 115.912   2
   0  -2  -3 1609.61 115.759   2
   0  -2  -3 1321.74 107.195   4
   0   2   3 1398.71 94.6026   1
   0  -2  -3 1488.26 91.3138   3
   0  -2  -4 3730.42 174.974   2
   0   2   4 3747.00 177.098   2
   0   2   4 3911.03 158.103   1
   0  -2  -4 3538.69 175.948   4
   0  -2  -4 3422.99 144.925   3
   0   2   4 3834.64 177.158   4
   0   2   4 3625.17 153.315   1
   0  -2  -4 3690.53 143.213   3
   0  -2  -5 28115.9 412.240   3
   0   2   5 27380.8 484.676   4
   0  -2  -5 28220.1 500.351   2
   0   2   5 27468.6 432.555   1
   0   2   5 27161.3 432.884   1
   0  -2  -5 28052.7 415.721   3
   0  -2  -5 28094.2 485.228   4
   0   2   5 27243.3 484.384   2
   0  -2  -6 836.253 88.6308   1
   0  -2  -6 1063.95 95.5408   3
   0  -2  -6 1104.23 109.928   2
   0   2   6 947.021 102.273   4
   0   2   6 972.220 107.443   2
   0   2   6 924.953 91.4000   3
   0   2   6 964.860 94.3064   1
   0  -2  -6 1088.93 106.317   4
   0  -2  -7 2419.57 143.813   3
   0   2   7 2437.15 161.564   2
   0   2   7 2090.13 137.596   3
   0  -2  -7 2272.88 144.895   1
   0   2   7 2331.28 143.410   1
   0   2   7 2310.94 157.289   4
   0  -2  -7 2497.28 161.251   2
   0  -2  -7 2340.50 160.992   4
   0   2   8 25543.8 517.584   4
   0   2   8 25911.1 534.400   2
   0  -2  -8 25494.2 523.361   4
   0   2   8 25786.4 488.548   3
   0   2   8 25917.3 494.990   1
   0  -2  -8 25374.8 491.165   1
   0  -2  -8 25708.4 482.764   3
   0  -2  -8 26012.6 524.813   2
   0   2   9 36777.8 621.763   3
   0  -2  -9 36748.1 652.449   4
   0  -2  -9 36173.4 617.046   3
   0   2   9 38086.2 668.136   2
   0  -2  -9 37500.4 663.719   2
   0  -2  -9 36951.0 626.538   1
   0   2   9 37507.3 624.385   1
   0   2   9 36098.8 645.519   4
   0  -2 -10 3958.52 231.173   4
   0  -2 -10 3874.99 217.271   3
   0  -2 -10 4021.27 221.173   1
   0   2  10 3658.65 214.698   1
   0   2  10 4093.14 227.671   3
   0   2  10 4227.21 235.446   2
   0  -2 -11 965.071 122.986   3
   0   2  11 845.344 114.384   1
   0  -2 -11 940.375 125.937   4
   0   2  11 933.162 128.716   2
   0  -2 -12 5774.68 289.119   3
   0   2  12 5565.33 284.503   2
   0   2  12 5940.36 293.901   1
   0  -2 -12 5878.95 290.751   4
   0   2  13 722.377 111.823   1
   0  -2 -13 611.113 108.956   3
   0   2  13 561.441 102.152   2
   0  -2 -13 783.928 124.831   4
   0   2  14 2456.95 205.751   1
   0   2  14 2361.77 203.174   2
   0  -2 -14 2519.56 209.650   3
   0  -2 -14 2678.33 214.388   4
   0  -2 -15 33260.4 757.867   4
   0  -2 -15 31380.3 748.530   3
   0   2  15 32325.3 745.551   2
   0   2  16 1706.20 192.719   1
   0  -2 -16 1634.94 185.832   3
   0   2  16 1630.30 185.866   2
   0  -2 -16 1686.98 183.592   4
   0  -2 -17 276.816 89.6805   4
   0   2  17 375.129 105.742   1
   0  -2 -17 370.789 113.908   3
   0   2  17 238.245 84.8816   2
   0  -2 -18 31279.8 789.383   4
   0   2  18 29761.1 815.676   1
   0  -2 -18 30105.7 828.226   3
   0   2  18 32213.6 813.929   2
   0   2  19 1562.08 202.740   1
   0   2  19 2078.07 220.742   2
   0  -2 -19 1817.32 205.310   4
   0  -2 -19 1465.37 203.497   3
   0   2  20 746.590 153.756   1
   0  -2 -20 680.555 157.012   3
   0   2  20 788.626 146.665   2
   0  -2 -20 608.170 134.634   4
   0   2  21 521.824 148.852   1
   0  -2 -21 221.216 112.169   3
   0   2  21 266.749 92.8693   2
   0  -2 -21 184.977 98.0794   4
   0  -2 -22 70.9030 97.9914   3
   0  -2 -22-76.6448 101.424   4
   0   2  22 69.7472 71.6422   2
   0   2  22-14.4469 95.1908   1
   0   2  23 118.288 109.162   1
   0  -2 -23 38.7310 92.8228   4
   0  -2 -23 33.3887 119.481   3
   0   2  23 0.57784 82.9240   2
   0   2  24 59.6992 91.5948   2
   0  -2 -24 41.5086 88.6321   4
   0   2  24-68.8742 94.1633   1
   0  -2 -24 189.030 119.838   3
   0  -2 -25 41.6699 103.881   3
   0   2  25 6.93689 114.107   1
   0   2  25 125.478 103.005   2
   0  -2 -25 131.777 94.4216   4
   0   2  26 119.226 109.740   1
   0  -2 -26 407.863 162.914   3
   0   2  26 442.847 153.615   2
   0  -2 -26 337.798 137.656   4
   0   2  27 1597.07 268.127   1
   0  -2 -27 1583.44 267.822   3
   0   2  27 1174.25 216.610   2
   0   2  28 5612.86 490.088   1
   0   2  28 5726.46 457.260   2
   0  -2 -28 5900.71 511.016   3
   0  -2 -29-44.2061 138.497   3
   0   2  29 84.0802 118.300   1
   0  -3  25 92.0246 121.413   1
   0   3 -25 391.570 182.623   3
   0   3 -24 308.544 152.610   2
   0  -3  24 202.763 127.946   1
   0   3 -24 98.6978 139.794   3
   0   3 -23 135.281 115.646   3
   0   3 -23-53.1080 111.130   2
   0  -3  23 88.6323 127.757   1
   0  -3  22-142.558 133.858   1
   0   3 -22-206.331 127.849   2
   0   3 -21 149.436 102.326   2
   0  -3  21 105.750 133.333   1
   0   3 -21 232.088 144.847   3
   0  -3  20 268.957 135.716   1
   0   3 -20 341.466 123.460   2
   0  -3  20 463.397 112.273   4
   0   3 -20 558.979 174.566   3
   0  -3  19 215.522 109.146   1
   0  -3  19 166.808 91.5219   4
   0   3 -19 186.134 126.157   3
   0   3 -19 40.1091 93.7080   2
   0  -3  18 351.864 103.762   4
   0   3 -18 302.519 126.441   3
   0   3 -18 340.431 113.526   2
   0  -3  18 289.365 124.644   1
   0   3 -17 526.740 134.183   2
   0  -3  17 567.289 116.485   4
   0   3 -17 612.008 151.638   3
   0  -3  17 527.994 145.183   1
   0  -3  16-91.5591 87.9871   1
   0  -3  16 13.7377 65.1000   4
   0   3 -16 30.5140 74.7509   2
   0   3 -16 42.6515 97.4685   3
   0   3 -15 158.039 100.108   3
   0   3 -15 50.0406 73.8052   2
   0  -3  15 49.3834 69.6599   4
   0  -3  15 19.8809 96.0566   1
   0  -3  14 206.576 93.5923   1
   0  -3  14 339.710 90.3779   4
   0   3 -14 240.187 85.7685   2
   0   3 -14 366.926 110.739   3
   0   3 -13 20.2001 62.2097   2
   0  -3  13 70.8575 69.4045   1
   0   3 -13 66.1075 73.7047   3
   0  -3  13 139.921 74.7860   4
   0   3 -12 10.4332 54.7522   2
   0  -3  12 152.033 95.7909   1
   0  -3  12-8.69762 57.0689   4
   0   3 -12-52.8607 75.3165   3
   0  -3  11 635.752 121.336   1
   0   3 -11 354.823 93.7435   2
   0   3 -11 359.096 103.893   3
   0  -3  11 331.921 79.4838   4
   0  -3  10-22.2298 47.6975   4
   0  -3  10 51.6267 71.4927   1
   0   3 -10-55.8476 69.4111   2
   0  -3  10 39.3914 52.2169   4
   0   3 -10-111.481 71.5985   3
   0  -3   9-11.3753 48.4848   4
   0  -3   9-43.4649 42.3408   4
   0  -3   9 45.8218 65.9222   1
   0   3  -9 20.8927 57.2880   2
   0   3  -9-19.8152 56.4960   3
   0  -3   8 142.973 58.3882   4
   0  -3   8 140.798 67.9330   1
   0   3  -8 86.6790 59.0843   3
   0  -3   8 102.128 52.9539   4
   0   3  -8 190.170 73.3319   2
   0   3  -7-11.3361 48.7776   2
   0  -3   7 126.370 56.9261   4
   0   3  -7 32.6816 54.5182   3
   0  -3   7-6.50666 54.6228   1
   0  -3   7 9.45910 50.1859   4
   0   3  -6-29.0797 50.4399   4
   0  -3   6 63.3830 46.1369   4
   0  -3   6 113.671 65.1251   1
   0   3  -6 93.8005 58.2931   2
   0   3  -6-12.2055 55.4276   3
   0   3  -6 98.8289 63.5153   2
   0  -3   5 47.7600 53.6765   3
   0   3  -5 7.24784 51.4821   2
   0  -3   5-46.1656 46.4229   4
   0  -3   5 118.093 63.7701   2
   0  -3   5-19.1295 57.3664   1
   0   3  -5 39.8148 45.7652   4
   0   3  -5 122.999 57.7827   3
   0  -3   4 42.8333 51.7616   3
   0   3  -4 37.3567 47.3814   3
   0   3  -4 8.22126 55.8173   2
   0  -3   4 46.6293 40.4929   4
   0   3  -4-24.6941 48.9852   1
   0  -3   4 77.2778 59.2698   2
   0  -3   4-3.71061 47.5502   1
   0   3  -4-35.0666 42.8813   4
   0  -3   3 14.8943 43.4084   4
   0  -3   3-15.1214 49.3727   3
   0   3  -3 34.9232 44.9256   4
   0  -3   3-9.33809 51.6960   2
   0   3  -3-31.6984 49.7659   1
   0   3  -3 32.8271 51.0644   3
   0  -3   3-8.36205 43.1059   1
   0   3  -3-74.3332 62.5852   2
   0  -3   2 13.6540 45.8438   2
   0   3  -2-58.6535 70.8024   2
   0  -3   2 74.3918 59.1344   1
   0   3  -2-87.7353 56.3028   3
   0  -3   2-43.8889 39.5564   3
   0  -3   2-46.9334 45.6453   4
   0   3  -2 39.0517 44.3007   4
   0   3  -2 23.1823 40.9929   1
   0   3  -1-14.2140 42.2221   1
   0   3  -1 23.2683 42.9841   3
   0  -3   1 79.8902 54.1171   4
   0  -3   1 3.24823 44.6511   1
   0   3  -1-12.1803 40.1834   4
   0  -3   1 13.0115 45.5910   3
   0  -3   1-29.5390 49.0340   2
   0   3  -1 33.9614 55.3010   2
   0   3   0-20.7254 40.7061   1
   0  -3   0-16.0410 44.6011   1
   0  -3   0 71.5234 55.5219   2
   0  -3   0 91.2753 50.9420   4
   0   3   0 46.5230 41.9266   3
   0   3   0 35.0418 50.9134   2
   0   3   0-9.38938 40.5735   4
   0  -3   0-65.0540 40.0393   3
   0  -3  -1 104.302 58.7937   2
   0  -3  -1 197.342 56.1662   3
   0   3   1 140.081 56.4560   4
   0  -3  -1 115.473 46.3172   4
   0   3   1 100.768 38.8901   3
   0   3   1 133.917 53.3984   1
   0  -3  -1 167.839 59.5221   1
   0   3   1 208.027 61.1421   2
   0  -3  -2 57.1413 44.5638   1
   0  -3  -2 127.476 46.5064   3
   0   3   2 28.9785 46.1281   4
   0   3   2 98.2523 45.1399   3
   0  -3  -2 41.9661 51.7824   2
   0   3   2 25.7976 67.0020   2
   0   3   2 9.69307 38.0366   1
   0  -3  -2 8.41060 48.6040   4
   0   3   3-30.8578 49.0562   4
   0  -3  -3 18.2387 46.4012   4
   0  -3  -3-27.2195 44.1904   2
   0   3   3-28.2418 39.9996   1
   0  -3  -3 112.121 51.0819   1
   0  -3  -3 72.7769 41.5550   3
   0   3   3-28.6484 37.2114   3
   0   3   3 2.37034 55.7383   2
   0   3   4-14.0309 52.7960   4
   0  -3  -4 42.3264 53.2079   2
   0  -3  -4-37.2679 46.5315   4
   0   3   4-51.1362 64.9727   2
   0   3   4-27.1244 47.0222   1
   0   3   4 78.3361 45.5438   3
   0  -3  -4-79.3076 46.2700   3
   0  -3  -4 22.5780 48.1239   1
   0  -3  -5 97.7049 55.9600   2
   0  -3  -5 71.8014 45.9064   1
   0  -3  -5 134.590 64.0480   4
   0   3   5 30.1895 69.1133   2
   0   3   5 207.383 58.5076   1
   0   3   5 150.253 63.9238   4
   0  -3  -5 167.445 46.9348   3
   0   3   6 143.834 57.3472   1
   0   3   6 8.42982 45.3203   1
   0   3   6 161.238 72.9570   2
   0  -3  -6 148.608 59.8341   2
   0  -3  -6 90.7834 60.3147   4
   0   3   6 131.141 56.0732   4
   0  -3  -6 135.888 44.1119   3
   0  -3  -6 170.243 47.3404   3
   0   3   7 341.867 71.7903   1
   0  -3  -7 339.694 81.1763   4
   0   3   7 304.863 66.1061   1
   0   3   7 446.348 97.6545   2
   0  -3  -7 404.290 69.4094   3
   0  -3  -7 332.966 66.9397   3
   0   3   8 1257.81 123.062   1
   0   3   8 1199.59 134.049   2
   0  -3  -8 1307.12 121.281   3
   0  -3  -8 1195.04 116.228   3
   0  -3  -8 1353.69 142.858   4
   0   3   8 1348.94 131.657   1
   0   3   9 336.216 72.9558   1
   0  -3  -9 304.158 86.5090   4
   0   3   9 223.454 83.0998   2
   0  -3  -9 319.817 71.8213   3
   0  -3  -9 193.257 65.6299   3
   0   3   9 275.899 70.5586   1
   0  -3 -10-68.5636 61.5214   4
   0   3  10 31.2023 53.3856   2
   0  -3 -10 74.3457 55.4484   3
   0   3  10-46.2937 59.1077   1
   0   3  11 250.006 76.0250   1
   0   3  11 144.718 80.4942   2
   0  -3 -11 227.888 70.1620   3
   0  -3 -11 142.764 60.6673   4
   0   3  12 288.508 82.6091   1
   0  -3 -12 260.961 87.7894   4
   0  -3 -12 142.829 62.7605   3
   0   3  12 260.225 87.6211   2
   0  -3 -13 112.702 71.7661   4
   0  -3 -13 76.8473 67.5632   3
   0   3  13 137.243 74.3656   2
   0   3  13 187.058 70.0099   1
   0   3  14 633.091 106.832   1
   0  -3 -14 732.300 124.849   3
   0  -3 -14 624.517 128.963   4
   0   3  14 709.978 136.156   2
   0  -3 -15 883.382 147.468   4
   0   3  15 925.662 141.962   2
   0  -3 -15 907.637 137.775   3
   0   3  15 757.484 135.595   1
   0  -3 -16 90.0468 75.8819   3
   0   3  16 222.070 102.095   2
   0  -3 -16 262.238 92.8013   4
   0   3  16 78.9965 74.6094   1
   0   3  17 155.644 86.4885   1
   0  -3 -17 221.473 93.8693   3
   0  -3 -17 265.782 99.2720   4
   0   3  17 264.258 96.8924   2
   0  -3 -18 90.0900 78.9861   4
   0  -3 -18 398.927 120.403   3
   0   3  18 317.646 124.458   2
   0   3  18 393.864 116.697   1
   0   3  19-92.0368 85.0690   1
   0   3  19-22.5503 82.2607   2
   0  -3 -19 172.709 86.5786   4
   0  -3 -19 164.810 100.856   3
   0   3  20 37.4293 76.6488   1
   0  -3 -20 24.7040 77.0907   4
   0   3  20-7.22817 87.0675   2
   0  -3 -20 84.5597 93.6409   3
   0   3  21-58.7340 99.0121   1
   0  -3 -21-114.777 124.740   3
   0  -3 -21 34.5141 77.6042   4
   0   3  21 104.211 99.3204   2
   0   3  22-52.3858 80.3655   1
   0  -3 -22-38.1252 107.073   3
   0   3  22-88.6896 82.4509   2
   0  -3 -22-9.29997 79.4832   4
   0  -3 -23 26.5587 97.8970   4
   0  -3 -23 36.0724 96.8776   3
   0   3  23 33.0780 85.1997   1
   0   3  23-33.2959 88.1324   2
   0   3  24-21.6697 97.0316   2
   0  -3 -24 50.9591 96.6847   4
   0   3  24 42.6717 103.599   1
   0  -3 -24 161.580 132.721   3
   0  -3 -25-137.431 130.859   3
   0   3  25 202.302 121.283   2
   0  -3 -25 280.959 144.982   4
   0   3  25-96.6064 100.871   1
   0   3  26 100.693 113.555   2
   0  -3 -26 78.3278 117.457   3
   0  -3 -26 243.878 131.672   4
   0   3  26 285.332 142.925   1
   0  -3 -27 212.638 147.946   4
   0   3  27-141.685 124.947   2
   0   3  27 85.3927 122.125   1
   0  -3 -27 108.453 123.941   3
   0   3  28 0.77509 123.957   2
   0   3  28 59.3963 127.564   1
   0  -3 -28-94.0601 149.597   3
   0   3  29 367.635 176.112   2
   0  -3 -29 48.6710 142.548   3
   0   4 -24 1720.53 306.477   3
   0  -4  24 1420.06 279.272   1
   0   4 -23 68.1620 120.942   3
   0  -4  23 219.805 159.827   1
   0  -4  22-62.7140 121.870   1
   0   4 -22-130.745 120.837   3
   0   4 -22 138.794 123.087   2
   0  -4  21 498.773 174.256   1
   0   4 -21 593.003 161.946   2
   0   4 -21 865.682 220.539   3
   0   4 -20 356.539 141.224   3
   0   4 -20 455.565 142.780   2
   0   4 -19-29.1365 102.637   3
   0  -4  19 235.358 128.063   1
   0   4 -19 183.874 104.311   2
   0   4 -18 26830.7 841.689   2
   0  -4  18 25541.3 923.548   1
   0   4 -18 28523.0 976.358   3
   0  -4  18 28166.4 737.018   4
   0   4 -17 277.598 118.520   2
   0  -4  17 142.720 83.9455   4
   0   4 -17 546.443 163.333   3
   0  -4  17 321.279 129.756   1
   0   4 -16 447.886 125.810   2
   0   4 -16 244.516 118.225   3
   0  -4  16 400.816 131.736   1
   0  -4  16 590.556 120.146   4
   0   4 -15 621.728 152.078   3
   0  -4  15 601.004 119.418   4
   0   4 -15 493.433 124.511   2
   0  -4  15 411.642 131.696   1
   0  -4  14 10152.7 525.511   1
   0   4 -14 10028.8 520.807   3
   0   4 -14 9197.20 454.761   2
   0  -4  14 9316.51 398.210   4
   0   4 -13 2809.95 253.081   2
   0   4 -13 3149.26 289.461   3
   0  -4  13 2922.62 283.475   1
   0  -4  13 2833.71 221.404   4
   0  -4  12-125.620 74.6569   1
   0   4 -12-23.8134 74.1650   2
   0  -4  12 76.4839 60.8911   4
   0   4 -12 140.392 85.3896   3
   0  -4  11 1938.36 219.909   1
   0  -4  11 1925.52 177.969   4
   0   4 -11 1927.88 219.034   3
   0   4 -11 1777.04 198.792   2
   0  -4  10 398.744 91.9589   4
   0   4 -10 460.033 117.734   3
   0   4 -10 395.231 99.2797   2
   0  -4  10 342.532 105.827   1
   0  -4   9 8797.11 357.703   4
   0   4  -9 9349.08 408.747   2
   0   4  -9 9553.86 430.153   3
   0  -4   9 9073.11 426.082   1
   0  -4   8 1792.15 190.457   1
   0  -4   8 1790.89 164.787   4
   0   4  -8 1755.35 179.986   2
   0   4  -8 2072.86 197.619   3
   0  -4   7 2549.85 217.203   1
   0   4  -7 2716.15 219.300   2
   0  -4   7 2427.87 184.240   4
   0   4  -7 2847.60 223.223   3
   0   4  -6 1257.60 144.291   2
   0  -4   6 1465.36 165.170   1
   0  -4   6 1689.30 157.452   4
   0   4  -6 1550.68 164.548   3
   0   4  -5 16497.6 484.243   3
   0  -4   5 15659.3 498.818   1
   0   4  -5 15891.9 493.327   2
   0  -4   5 16424.1 456.363   4
   0   4  -4 1142.01 144.136   2
   0   4  -4 852.896 117.986   3
   0  -4   4 753.571 119.357   1
   0  -4   4 755.919 108.635   4
   0   4  -3 2334.15 176.074   3
   0  -4   3 2209.78 172.352   4
   0  -4   3 2127.75 176.896   1
   0   4  -3 2290.59 189.623   2
   0  -4   2 570.050 98.7847   1
   0   4  -2 675.398 106.104   3
   0   4  -2 663.970 115.021   2
   0  -4   2 564.105 96.7777   4
   0  -4   2 623.588 97.4462   3
   0   4  -1 664.144 94.9343   3
   0   4  -1 498.659 94.9718   2
   0  -4   1 504.421 85.1283   3
   0  -4   1 528.021 93.7601   4
   0  -4   1 683.482 107.648   1
   0  -4   0 220.021 73.9814   4
   0   4   0 324.491 72.0292   1
   0   4   0 352.787 80.2497   3
   0  -4   0 304.244 76.0165   1
   0  -4   0 261.600 61.8340   3
   0   4   0 385.674 95.3317   2
   0   4   1 11656.4 408.503   2
   0   4   1 11820.4 365.322   1
   0  -4  -1 13272.0 394.268   1
   0  -4  -1 12269.9 343.643   3
   0   4   1 12355.0 342.190   3
   0   4   2 456.413 85.0816   1
   0  -4  -2 308.574 76.5201   4
   0   4   2 361.744 70.4452   3
   0  -4  -2 369.062 85.9502   1
   0   4   2 280.100 88.4036   2
   0  -4  -2 365.249 68.2144   3
   0   4   3-19.9851 48.0562   1
   0  -4  -3 77.2801 54.0184   1
   0   4   3 136.902 63.6740   2
   0  -4  -3 111.691 65.9353   4
   0   4   3 76.0290 50.6848   3
   0  -4  -3 134.672 54.6180   3
   0   4   4 3795.41 244.298   2
   0  -4  -4 3953.01 195.564   3
   0   4   4 4011.72 212.139   1
   0   4   4 3944.76 191.763   3
   0  -4  -4 3582.05 228.235   4
   0  -4  -4 4054.90 217.726   1
   0  -4  -5 11888.6 415.697   4
   0   4   5 12467.9 335.286   3
   0  -4  -5 12200.5 337.327   3
   0   4   5 12491.2 430.932   2
   0  -4  -5 12978.5 381.975   1
   0   4   5 12671.4 383.674   1
   0  -4  -6 612.338 92.3987   1
   0   4   6 648.333 99.6942   1
   0  -4  -6 604.244 80.5286   3
   0  -4  -6 495.753 100.866   4
   0   4   6 454.221 95.2890   2
   0  -4  -7 519.169 80.6630   3
   0  -4  -7 529.907 100.364   4
   0  -4  -7 470.992 77.9414   3
   0   4   7 538.546 99.9565   1
   0   4   7 451.777 81.8538   1
   0   4   7 393.067 90.9103   2
   0   4   8 12392.2 402.143   1
   0  -4  -8 12573.7 378.970   3
   0  -4  -8 12207.8 451.691   4
   0  -4  -8 11867.6 362.852   3
   0   4   8 11976.2 449.905   2
   0   4   9 132.316 67.6934   2
   0  -4  -9 5.82039 49.1212   3
   0  -4  -9 143.794 65.2567   3
   0   4   9 45.6361 48.4003   1
   0  -4  -9-39.0419 64.6847   4
   0  -4 -10 2503.62 220.231   4
   0  -4 -10 2412.53 181.124   3
   0   4  10 2651.49 223.160   2
   0   4  10 2565.42 196.123   1
   0  -4 -11 1672.55 162.010   3
   0   4  11 1607.11 182.160   2
   0  -4 -11 1600.32 182.148   4
   0   4  11 1766.05 169.357   1
   0  -4 -12 641.155 129.013   4
   0  -4 -12 810.153 122.685   3
   0   4  12 758.652 136.125   2
   0   4  12 804.235 122.037   1
   0   4  13 1464.07 168.445   1
   0   4  13 1269.91 171.566   2
   0  -4 -13 1584.27 167.752   3
   0  -4 -13 1515.99 182.680   4
   0   4  14 2936.96 253.034   2
   0   4  14 2544.43 220.501   1
   0  -4 -14 3149.13 263.968   4
   0  -4 -14 2751.01 221.648   3
   0   4  15 2128.08 210.228   1
   0   4  15 2185.78 234.890   2
   0  -4 -15 2033.18 220.696   4
   0  -4 -15 1877.00 191.864   3
   0   4  16 682.915 155.766   2
   0   4  16 527.627 128.096   1
   0  -4 -16 474.445 125.684   4
   0  -4 -16 607.141 126.228   3
   0   4  17 14916.9 601.017   2
   0  -4 -17 15106.3 608.459   4
   0   4  17 15192.8 580.781   1
   0  -4 -17 14503.5 555.486   3
   0  -4 -18 1228.74 184.839   3
   0   4  18 1419.65 190.471   1
   0  -4 -18 1671.86 218.986   4
   0   4  18 1180.47 183.151   2
   0   4  19 888.466 171.390   1
   0  -4 -19 1139.84 196.058   4
   0  -4 -19 844.523 161.206   3
   0   4  19 1260.53 204.707   2
   0   4  20 253.595 112.570   1
   0  -4 -20 132.455 90.4625   4
   0   4  20 413.232 127.604   2
   0  -4 -20 88.4804 82.5352   3
   0  -4 -21-40.3415 84.6174   3
   0  -4 -21 42.2013 83.7640   4
   0   4  21 35.9878 105.252   1
   0   4  21 94.4642 96.4162   2
   0   4  22 55.8248 97.3622   2
   0   4  22 193.491 109.749   1
   0  -4 -22 46.4651 94.1445   4
   0  -4 -22 160.710 108.637   3
   0  -4 -23 89.8073 119.302   3
   0   4  23-110.356 105.187   1
   0  -4 -23-38.4459 93.2210   4
   0   4  23-88.2511 104.601   2
   0  -4 -24 38.7972 93.2877   4
   0   4  24 268.557 133.260   2
   0  -4 -24 253.884 150.303   3
   0   4  25 326.584 127.005   1
   0   4  25 327.867 150.849   2
   0  -4 -25 364.169 144.452   4
   0  -4 -25 580.718 178.232   3
   0  -4 -26 1971.74 278.020   4
   0   4  26 1533.16 253.963   1
   0  -4 -26 2036.51 288.746   3
   0   4  26 2065.07 293.803   2
   0   4  27 7994.16 558.293   2
   0  -4 -27 6857.47 520.129   3
   0  -4 -27 6614.23 500.937   4
   0   4  27 6248.20 499.747   1
   0   4  28 396.575 188.119   2
   0  -4 -28 117.130 128.437   4
   0   4  28 76.5142 145.476   1
   0  -4 -28-62.5405 146.936   3
   0  -4 -29 337.020 181.413   3
   0   4  29 126.711 144.291   1
   0   4  29 449.034 190.857   2
   0   5 -22-33.7983 120.614   3
   0  -5  22-31.7681 114.246   1
   0  -5  21-5.03997 112.273   1
   0   5 -21 138.795 124.831   2
   0   5 -21 154.654 154.658   3
   0   5 -20 68.0505 116.103   2
   0   5 -20 97.8462 120.657   3
   0  -5  20-43.5699 113.952   1
   0   5 -19-175.732 151.906   3
   0   5 -19-47.7728 106.071   2
   0  -5  19-24.8360 97.2650   1
   0  -5  18-121.420 126.957   1
   0   5 -18 219.872 119.055   2
   0   5 -18 309.317 144.414   3
   0  -5  17 115.199 95.1611   1
   0   5 -17-143.974 131.647   3
   0   5 -17 63.3137 85.2159   2
   0   5 -16 258.388 100.501   2
   0  -5  16 181.237 79.0394   4
   0  -5  16 362.254 137.723   1
   0   5 -16 68.5568 101.375   3
   0   5 -15 105.920 99.9088   2
   0  -5  15 113.491 72.5238   4
   0   5 -15 63.7612 111.901   3
   0  -5  15-129.769 122.689   1
   0   5 -14 283.764 107.565   2
   0  -5  14 228.978 125.595   1
   0   5 -14 546.244 148.314   3
   0  -5  14 162.098 80.3373   4
   0   5 -13 71.0363 71.5935   2
   0   5 -13 255.730 110.451   3
   0  -5  13 164.142 95.2767   1
   0  -5  13 409.735 113.444   4
   0  -5  12 1.68508 72.2145   4
   0  -5  12 146.907 89.9056   1
   0   5 -12-61.5767 88.7666   2
   0   5 -12-78.4086 96.2904   3
   0  -5  11 136.064 79.8109   1
   0   5 -11 41.6530 77.5516   3
   0   5 -11 147.893 85.3871   2
   0  -5  11-22.7742 69.5615   4
   0   5 -10 94.7504 79.6922   3
   0  -5  10 64.8631 74.1291   1
   0   5 -10-63.5957 70.8817   2
   0  -5  10-5.34622 66.1009   4
   0  -5   9 58.6497 59.2933   4
   0   5  -9 37.7033 67.2264   2
   0  -5   9-54.9185 75.2204   1
   0   5  -9-19.1021 65.9142   3
   0   5  -8 29.2409 64.4147   3
   0  -5   8 30.7789 62.4355   4
   0  -5   8-14.0916 77.5450   1
   0   5  -8-78.4255 76.9421   2
   0  -5   7-12.7119 61.8480   1
   0   5  -7-40.5231 63.2337   3
   0   5  -7 137.064 81.3896   2
   0  -5   7-23.0339 64.6013   4
   0  -5   6 154.601 91.7158   1
   0   5  -6 161.605 86.0156   3
   0   5  -6 126.873 76.6090   2
   0  -5   6 164.057 76.3448   4
   0   5  -5 40.9815 67.7617   3
   0   5  -5 43.3523 61.2467   2
   0  -5   5 61.8490 71.7576   1
   0  -5   5 50.4294 58.7791   4
   0   5  -4 49.1854 60.2246   3
   0  -5   4 0.16502 56.1704   4
   0   5  -4 171.096 81.2973   2
   0  -5   4 136.700 84.4888   1
   0   5  -3 127.353 73.2276   3
   0   5  -3 264.836 99.7038   2
   0  -5   3 155.637 79.8222   4
   0  -5   3 221.978 82.1543   1
   0  -5   2 85.1840 61.8215   1
   0   5  -2-52.5897 63.3074   2
   0  -5   2-76.4051 63.1015   4
   0   5  -1-55.7569 62.9557   2
   0  -5   1-9.39293 49.1694   1
   0   5  -1-11.0307 44.6973   3
   0  -5   1 6.12948 57.0250   4
   0  -5   0 48.7159 59.5679   4
   0   5   0 18.1452 59.5531   2
   0   5   0 19.3614 50.7139   3
   0  -5   0-21.5616 51.8165   1
   0  -5  -1 87.9542 66.0512   1
   0  -5  -1 50.6790 64.0114   4
   0   5   1 94.9540 49.9007   3
   0   5   1 248.667 97.1476   2
   0   5   2-65.1294 58.1392   3
   0   5   2-14.8503 66.9982   2
   0  -5  -2-13.7479 48.2954   3
   0  -5  -2-33.3407 62.0171   1
   0  -5  -2-4.47974 71.5690   4
   0  -5  -3 62.3407 59.3373   1
   0  -5  -3 47.6042 43.8650   3
   0  -5  -3 8.77061 53.4097   4
   0   5   3-4.52725 46.4484   3
   0   5   3 12.5042 73.9191   2
   0   5   4 54.3137 69.5171   2
   0   5   4 51.1315 49.2009   3
   0  -5  -4 63.0484 49.6152   3
   0  -5  -4 60.3779 60.0812   1
   0  -5  -4 72.0702 70.7580   4
   0   5   5-8.86847 59.9999   2
   0  -5  -5-21.1538 48.0512   1
   0   5   5-8.70226 52.0404   3
   0  -5  -5 24.6995 43.9710   3
   0  -5  -5 27.3834 64.8572   4
   0  -5  -6 24.2361 45.9279   3
   0   5   6-113.997 70.2921   2
   0  -5  -6 16.7167 59.1389   1
   0  -5  -6 188.351 84.6848   4
   0   5   6 144.792 60.2685   3
   0  -5  -7 285.003 81.4778   1
   0  -5  -7 254.148 73.0675   3
   0   5   7 207.520 86.1192   2
   0  -5  -7 396.661 105.118   4
   0  -5  -8 54.5324 68.5222   4
   0   5   8 67.6793 50.2793   1
   0  -5  -8-12.2319 59.7976   3
   0   5   8-43.9326 63.7558   2
   0   5   9 108.046 64.4543   1
   0   5   9 77.8047 82.8635   2
   0  -5  -9-31.2986 50.1527   3
   0  -5  -9-32.9715 64.5025   4
   0   5  10 386.167 96.7901   1
   0  -5 -10 588.400 103.887   3
   0  -5 -10 626.572 137.581   4
   0   5  10 253.363 83.9393   2
   0   5  11 84.2033 83.7065   2
   0   5  11 3.56682 55.6483   1
   0  -5 -11 116.566 95.5225   4
   0  -5 -11 5.09120 57.7400   3
   0   5  12-29.9390 58.3549   1
   0  -5 -12-8.96782 82.6114   4
   0  -5 -12 56.5632 63.3462   3
   0   5  12-38.2768 89.9742   2
   0   5  13 947.437 150.997   1
   0   5  13 1054.44 170.335   2
   0  -5 -13 994.485 139.860   3
   0  -5 -13 1243.53 191.163   4
   0  -5 -14 2196.91 208.375   3
   0   5  14 1896.32 224.986   2
   0  -5 -14 1798.10 229.129   4
   0   5  14 1978.98 202.624   1
   0   5  15 681.289 133.009   1
   0  -5 -15 687.015 130.932   3
   0   5  15 1012.87 184.715   2
   0  -5 -16 1567.54 187.254   3
   0   5  16 1490.22 188.949   1
   0  -5 -16 1279.71 190.992   4
   0   5  16 1532.24 213.951   2
   0   5  17 1314.48 209.696   2
   0  -5 -17 1447.02 187.424   3
   0  -5 -17 1485.44 214.352   4
   0   5  17 1466.50 186.594   1
   0  -5 -18 111.568 98.6055   4
   0  -5 -18 159.954 82.2573   3
   0   5  18 139.803 124.456   2
   0   5  18 133.461 94.5568   1
   0  -5 -19-98.0615 107.011   4
   0   5  19 61.9704 76.6494   1
   0  -5 -19 104.367 117.456   3
   0   5  19 77.2225 107.869   2
   0  -5 -20 22.1854 94.9623   3
   0  -5 -20-70.7778 93.0916   4
   0   5  20 70.7595 86.3364   2
   0   5  20 31.3751 84.9483   1
   0   5  21-26.3792 94.8157   1
   0  -5 -21 98.2840 89.0294   3
   0  -5 -21-120.685 114.922   4
   0   5  21 40.7600 97.5406   2
   0   5  22 168.555 101.561   2
   0  -5 -22 28.8194 98.0644   4
   0  -5 -22 92.1179 91.5598   3
   0   5  22-97.6520 110.537   1
   0   5  23 91.2441 96.5297   1
   0  -5 -23 103.220 97.3504   4
   0   5  23 314.441 156.329   2
   0  -5 -23 220.982 132.902   3
   0   5  24-38.4117 103.546   2
   0   5  24 235.902 107.861   1
   0  -5 -24 184.959 132.687   3
   0  -5 -24 271.895 149.455   4
   0   5  25 71.9313 135.515   2
   0  -5 -25 198.412 138.326   4
   0   5  25 216.673 125.156   1
   0  -5 -25 87.8272 122.507   3
   0  -5 -26 1167.40 245.442   4
   0   5  26 860.098 202.861   1
   0   5  26 594.907 175.445   2
   0  -5 -26 1348.61 247.700   3
   0   5  27-231.233 150.981   1
   0   5  27 69.3848 123.504   2
   0  -5 -27 134.952 133.233   4
   0  -5 -27 20.2146 150.970   3
   0  -5 -28-34.9695 125.034   4
   0   5  28 294.406 189.036   2
   0   6 -20 61.4724 136.042   3
   0  -6  20 247.644 168.069   1
   0   6 -19 9197.95 561.099   2
   0  -6  19 9526.06 653.784   1
   0   6 -19 9431.62 629.873   3
   0  -6  18 3041.99 366.608   1
   0   6 -18 2252.56 292.327   2
   0   6 -18 2194.02 308.535   3
   0  -6  17 1415.39 255.592   1
   0   6 -17 1653.62 242.595   2
   0   6 -17 1615.09 272.052   3
   0   6 -16 2791.08 328.947   3
   0  -6  16 2959.20 343.619   1
   0   6 -16 2951.98 310.822   2
   0   6 -15 1840.40 262.954   3
   0   6 -15 1985.47 258.630   2
   0  -6  15 2086.49 288.203   1
   0  -6  14 1270.38 176.230   4
   0   6 -14 1140.82 202.529   2
   0   6 -14 1555.33 241.032   3
   0  -6  14 1238.79 210.894   1
   0   6 -13 1611.50 226.845   2
   0  -6  13 1466.02 191.979   4
   0   6 -13 1597.94 230.057   3
   0  -6  13 1616.78 242.371   1
   0  -6  12 129.673 103.167   1
   0  -6  12-21.1961 69.9093   4
   0   6 -12-92.6757 95.2440   2
   0   6 -11-182.925 116.301   3
   0   6 -11-36.8413 86.3404   2
   0  -6  11 19.4341 63.0040   4
   0  -6  10 1365.72 208.158   1
   0  -6  10 1100.31 165.224   4
   0   6 -10 1498.47 209.640   3
   0   6 -10 1278.94 192.689   2
   0   6  -9 8350.49 468.556   2
   0  -6   9 8402.47 414.639   4
   0   6  -9 8915.87 470.624   3
   0  -6   9 7813.27 462.412   1
   0   6  -8 480.995 127.765   2
   0  -6   8 440.874 110.659   4
   0   6  -8 652.453 136.363   3
   0  -6   7 223.393 114.063   1
   0   6  -7 249.330 93.6007   2
   0   6  -7 176.417 101.574   3
   0  -6   7 32.3789 59.7406   4
   0  -6   6 5343.88 362.095   1
   0  -6   6 4280.38 303.827   4
   0   6  -6 4818.96 343.545   2
   0   6  -6 4956.67 327.723   3
   0   6  -5 106.981 79.4802   2
   0  -6   5 168.775 85.6007   1
   0  -6   5 195.064 78.3370   4
   0   6  -5 367.807 108.562   3
   0   6  -4 81.3816 67.3997   3
   0   6  -4 131.931 96.7581   2
   0  -6   4 85.4669 88.1699   1
   0  -6   4 184.197 80.3510   4
   0  -6   3 17594.0 592.804   4
   0   6  -3 18626.8 584.037   3
   0  -6   3 19312.9 629.294   1
   0   6  -3 18914.5 655.852   2
   0   6  -2 340.029 120.889   2
   0  -6   2 215.845 88.2279   1
   0   6  -2 374.918 99.6761   3
   0  -6   2 429.713 115.289   4
   0   6  -1 295.345 88.3854   3
   0  -6   1 305.063 87.8188   4
   0  -6   1 281.330 98.9714   1
   0   6  -1 241.562 98.1215   2
   0  -6   0 15675.7 545.384   1
   0   6   0 16256.7 605.590   2
   0  -6   0 15142.5 550.473   4
   0   6   0 16222.7 499.633   3
   0  -6  -1-63.8126 70.3085   1
   0   6   1 19.5862 65.9819   3
   0   6   1-36.4888 74.4160   2
   0  -6  -1 119.335 88.3761   4
   0   6   2 202.086 76.1389   3
   0  -6  -2-9.52655 61.5186   1
   0  -6  -2 140.623 78.3153   4
   0   6   2 205.227 90.1035   2
   0   6   3 332.005 84.9276   3
   0  -6  -3 349.933 87.2455   1
   0   6   3 147.804 84.0447   2
   0  -6  -3 339.446 105.630   4
   0   6   4 15107.2 579.213   2
   0   6   4 15016.5 451.588   3
   0  -6  -4 14296.4 493.392   1
   0  -6  -5 1174.83 174.415   4
   0   6   5 1205.39 171.544   2
   0   6   5 1496.18 141.598   3
   0  -6  -5 1290.88 162.379   1
   0   6   6 1412.11 190.604   2
   0  -6  -6 948.735 158.827   4
   0   6   6 1394.28 139.676   3
   0  -6  -6 1189.27 153.012   1
   0  -6  -7 992.348 163.612   4
   0   6   7 977.458 125.222   3
   0   6   7 878.043 154.256   2
   0  -6  -7 999.508 139.570   1
   0   6   8 1225.49 194.806   2
   0  -6  -8 887.715 159.032   4
   0  -6  -8 1027.92 137.214   3
   0   6   9 5495.17 331.350   1
   0  -6  -9 6130.10 318.715   3
   0  -6  -9 5384.94 360.686   4
   0   6   9 5992.29 392.405   2
   0   6  10 3892.10 279.147   1
   0  -6 -10 3781.62 254.157   3
   0  -6 -10 3303.99 297.602   4
   0  -6 -11 1783.31 178.557   3
   0   6  11 1583.00 182.234   1
   0   6  11 1820.94 227.416   2
   0  -6 -11 1721.92 223.971   4
   0  -6 -12 357.904 90.2264   3
   0   6  12 407.922 108.964   1
   0   6  12 287.345 110.266   2
   0  -6 -12 372.621 135.617   4
   0   6  13 10368.5 535.757   2
   0  -6 -13 10715.2 543.147   4
   0   6  13 10616.9 470.582   1
   0  -6 -13 10157.5 424.987   3
   0  -6 -14 2000.19 242.635   4
   0   6  14 2248.87 229.966   1
   0   6  14 1706.93 227.507   2
   0  -6 -14 2108.23 209.801   3
   0  -6 -15 1479.81 179.257   3
   0  -6 -15 1593.89 229.977   4
   0   6  15 1718.91 205.410   1
   0   6  15 1387.48 226.113   2
   0  -6 -16 173.596 87.3629   3
   0   6  16 267.977 105.141   1
   0  -6 -16 67.4746 95.0137   4
   0   6  16 171.561 119.580   2
   0  -6 -17 546.927 125.588   3
   0   6  17 954.329 169.107   1
   0   6  17 620.906 165.455   2
   0  -6 -17 902.350 190.607   4
   0  -6 -18 35.3869 113.584   4
   0  -6 -18 285.079 107.345   3
   0   6  18 387.743 118.523   1
   0   6  18 199.158 125.907   2
   0   6  19 99.1283 79.1815   1
   0  -6 -19 145.294 106.988   3
   0  -6 -19 467.394 148.309   4
   0   6  19 318.901 122.612   2
   0  -6 -20 256.542 132.821   4
   0   6  20 380.794 128.276   1
   0  -6 -20 387.886 119.393   3
   0   6  20 88.4079 105.663   2
   0   6  21-73.5357 101.787   2
   0  -6 -21-11.7245 112.263   3
   0   6  21-69.2285 104.660   1
   0  -6 -21 15.9256 99.3356   4
   0  -6 -22-23.4476 105.746   4
   0  -6 -22 79.6427 100.482   3
   0   6  22 22.3783 108.449   2
   0   6  22 234.612 123.558   1
   0   6  23 117.903 107.624   1
   0  -6 -23 211.611 164.101   4
   0  -6 -23 230.748 132.832   3
   0   6  23 182.786 137.825   2
   0  -6 -24 246.148 145.890   3
   0  -6 -24-34.8636 118.094   4
   0   6  24 109.227 127.933   2
   0   6  24-173.409 129.637   1
   0  -6 -25 353.758 172.212   4
   0   6  25 3.41464 123.519   2
   0   6  26 3815.40 414.766   2
   0  -6 -26 3682.99 418.876   4
   0   7 -19 642.641 228.309   3
   0  -7  18-98.2304 127.596   1
   0   7 -18 116.073 123.122   2
   0   7 -18-36.8948 125.601   3
   0   7 -17 135.798 127.833   3
   0   7 -17 116.171 134.508   2
   0  -7  17-96.2409 142.921   1
   0  -7  16-94.1686 127.291   1
   0   7 -16 109.806 133.445   2
   0   7 -16 95.7142 110.023   3
   0   7 -15 263.718 145.357   3
   0  -7  15 2.10261 114.652   1
   0   7 -15 304.827 152.724   2
   0   7 -14 330.128 149.565   3
   0   7 -14 688.110 177.659   2
   0  -7  14 400.713 167.007   1
   0  -7  13 70.8486 105.183   1
   0  -7  13 29.9906 79.9199   4
   0   7 -13 222.888 136.524   3
   0   7 -13 218.721 121.739   2
   0   7 -12 105.475 106.648   3
   0  -7  12 69.9136 98.1795   1
   0   7 -12 38.7795 89.6444   2
   0  -7  12 77.8314 85.6271   4
   0  -7  11 189.518 129.606   1
   0  -7  11 51.4714 80.2021   4
   0   7 -11 235.147 116.247   3
   0   7 -11 135.013 115.596   2
   0   7 -10 250.616 113.880   3
   0  -7  10 257.224 129.459   1
   0  -7  10 159.952 96.5312   4
   0   7 -10 45.9951 97.1760   2
   0  -7   9-60.9207 80.6162   4
   0   7  -9 19.3337 82.0933   2
   0   7  -9-7.31647 86.2507   3
   0  -7   9-124.481 103.632   1
   0  -7   8 135.740 97.9861   4
   0  -7   8 27.6337 73.9350   1
   0   7  -8 19.7005 96.5703   3
   0   7  -8 66.7606 102.557   2
   0  -7   7-175.755 98.8205   4
   0   7  -7-10.5281 77.3968   3
   0   7  -7 96.1455 115.935   2
   0  -7   7 97.3103 100.828   1
   0  -7   6 166.024 110.001   4
   0  -7   6 49.3026 90.6782   1
   0   7  -6 62.4518 94.8604   3
   0   7  -6-84.6586 90.4733   2
   0  -7   5-129.144 83.6971   1
   0  -7   5 1.95491 82.6865   4
   0   7  -5 36.9435 98.4807   2
   0   7  -5-224.364 112.484   3
   0  -7   4 131.356 98.8355   1
   0  -7   4 69.7651 73.5300   4
   0   7  -4-81.6232 77.7804   3
   0   7  -4 9.23037 85.9664   2
   0  -7   3 66.1211 80.5280   1
   0   7  -3-33.6851 85.3045   2
   0   7  -3 110.456 86.3110   3
   0  -7   3-178.195 73.5510   4
   0   7  -2 42.6298 79.6670   3
   0   7  -2-103.889 108.661   2
   0  -7   2-17.9118 92.9287   4
   0  -7   2-82.5776 85.6476   1
   0  -7   1 40.8219 76.7073   1
   0   7  -1 4.76453 68.6868   3
   0   7  -1-21.1015 91.1179   2
   0  -7   1 33.6213 85.6613   4
   0   7   0 33.6390 71.2800   3
   0  -7   0 104.171 82.3050   4
   0  -7   0-89.5439 79.5564   1
   0   7   0-38.7739 87.7860   2
   0  -7  -1-57.1898 86.6994   4
   0   7   1 23.2523 89.7627   2
   0  -7  -1-89.2723 89.5801   1
   0   7   1 64.4021 81.5379   3
   0   7   2 50.2236 75.6152   3
   0  -7  -2-18.3397 70.6861   4
   0   7   2 61.1754 88.2557   2
   0  -7  -2-12.0111 69.3480   1
   0   7   3-93.0318 67.8546   3
   0  -7  -3 115.512 90.6181   1
   0   7   3-9.63744 85.0083   2
   0  -7  -3 137.563 92.6249   4
   0  -7  -4-50.4290 94.7487   4
   0   7   4-111.613 103.970   2
   0   7   4-15.8273 67.5307   3
   0  -7  -4-92.7196 80.7624   1
   0  -7  -5 25.5570 74.3218   1
   0   7   5 100.196 61.9676   3
   0   7   5 43.4764 82.3125   2
   0   7   6 99.7632 102.865   2
   0   7   6 62.0284 74.2320   3
   0  -7  -6 91.3259 90.9139   4
   0  -7  -6-49.6255 72.9705   1
   0   7   7 310.228 89.5090   3
   0  -7  -7 19.3552 78.8946   4
   0   7   7 71.4273 88.2197   2
   0  -7  -7 172.135 82.5043   1
   0  -7  -8 191.415 112.086   4
   0  -7  -8 74.0910 80.8183   1
   0  -7  -8 118.744 86.1856   3
   0   7   8-31.2212 100.124   2
   0   7   9 33.9566 84.6542   1
   0   7   9 129.507 120.464   2
   0  -7  -9 54.8584 70.7840   3
   0  -7  -9-6.37160 75.9275   4
   0  -7 -10 314.266 118.004   4
   0  -7 -10 207.500 78.8582   3
   0   7  10 552.437 155.436   2
   0   7  10 352.380 101.776   1
   0  -7 -11 170.986 80.7680   3
   0   7  11 17.0023 79.4676   1
   0  -7 -11 168.161 110.861   4
   0   7  11 5.07455 92.9021   2
   0  -7 -12-24.5069 88.6129   4
   0   7  12 189.785 98.9212   1
   0   7  12 98.2811 112.039   2
   0  -7 -12 80.7915 76.3895   3
   0   7  13 307.665 116.483   2
   0   7  13 110.260 91.5480   1
   0  -7 -13 22.5194 99.3971   4
   0  -7 -13 148.623 93.8662   3
   0   7  14-73.2574 80.8083   1
   0  -7 -14 279.842 106.971   3
   0  -7 -14 179.076 120.848   4
   0   7  14 352.961 147.399   2
   0  -7 -15 509.945 122.967   3
   0   7  15 444.174 130.016   1
   0   7  15 559.054 154.321   2
   0  -7 -15 243.584 125.635   4
   0  -7 -16 724.753 150.044   3
   0  -7 -16 385.140 151.608   4
   0   7  16 551.322 170.646   2
   0   7  16 705.159 151.441   1
   0  -7 -17 228.284 134.544   4
   0   7  17 54.7871 104.825   2
   0  -7 -17 116.932 94.0752   3
   0   7  17-68.6555 93.7301   1
   0   7  18 75.8622 117.978   2
   0  -7 -18-56.2288 114.156   4
   0   7  18 85.9299 83.4516   1
   0  -7 -18 43.5267 99.5697   3
   0  -7 -19 66.9763 98.8824   3
   0  -7 -19 184.343 129.521   4
   0   7  19 240.229 118.962   1
   0   7  19 20.8114 116.123   2
   0   7  20 62.2674 101.072   2
   0   7  20 92.2810 108.720   1
   0  -7 -20 207.393 135.128   4
   0   7  21 19.3526 112.440   2
   0   7  21-115.408 120.019   1
   0  -7 -21 280.283 159.036   4
   0  -7 -22 81.4178 133.994   4
   0  -7 -23 19.6582 123.458   4
   0   7  23-9.73686 114.990   2
   0   7  24-158.273 163.550   2
   0  -7 -24 42.4773 138.806   4
   0   8 -16-47.2407 153.773   3
   0  -8  15 179.241 151.764   1
   0   8 -15 44.6009 125.400   2
   0   8 -15 206.027 151.882   3
   0   8 -14 2207.56 317.068   2
   0   8 -14 2065.02 312.880   3
   0  -8  14 1902.95 303.355   1
   0   8 -13 431.661 150.800   2
   0   8 -13 806.850 206.306   3
   0  -8  13 492.869 179.632   1
   0   8 -12 27.4296 101.058   2
   0   8 -12-104.379 113.383   3
   0  -8  12-80.8544 147.663   1
   0   8 -11 71.6275 112.070   3
   0  -8  11 467.189 180.726   1
   0   8 -11 217.252 151.128   2
   0   8 -10 4875.49 432.652   2
   0   8 -10 4938.98 413.119   3
   0  -8  10 4424.38 404.324   1
   0  -8  10 3887.27 336.899   4
   0  -8   9-8.46889 97.7520   1
   0   8  -9 208.493 119.683   2
   0  -8   9 98.5260 100.542   4
   0   8  -9 262.880 127.916   3
   0   8  -8 2200.27 277.313   3
   0   8  -8 2337.12 298.534   2
   0  -8   8 2447.32 273.786   4
   0  -8   8 2018.84 274.480   1
   0  -8   7 815.715 162.987   4
   0   8  -7 717.705 171.744   3
   0   8  -7 667.450 169.820   2
   0  -8   7 676.499 167.128   1
   0   8  -6 252.793 136.432   2
   0   8  -6 301.375 121.508   3
   0  -8   6 280.305 128.443   1
   0  -8   6 309.118 116.019   4
   0  -8   5 361.887 124.096   4
   0   8  -5 243.920 110.409   3
   0   8  -5 335.900 143.480   2
   0  -8   5 376.671 139.314   1
   0  -8   4 3041.51 313.484   1
   0  -8   4 2945.12 296.827   4
   0   8  -4 3371.49 350.607   2
   0   8  -4 2940.85 277.858   3
   0  -8   3 15.9842 93.2355   4
   0   8  -3 202.727 100.767   3
   0   8  -3 178.383 112.301   2
   0  -8   3 378.260 145.839   1
   0   8  -2 130.504 87.2744   3
   0   8  -2 191.574 106.309   2
   0  -8   2 252.444 121.825   1
   0  -8   2 56.3083 82.7405   4
   0   8  -1 2881.72 262.958   3
   0   8  -1 2740.40 307.204   2
   0  -8   1 2889.90 291.615   1
   0  -8   1 2914.93 293.821   4
   0   8   0 2027.60 218.203   3
   0  -8   0 1197.76 197.496   4
   0   8   0 1927.04 261.825   2
   0  -8   0 1845.19 240.989   1
   0   8   1 717.576 164.827   2
   0  -8  -1 593.040 141.750   1
   0  -8  -1 455.883 138.290   4
   0   8   1 466.775 120.785   3
   0   8   2 2991.04 250.938   3
   0  -8  -2 3208.44 293.934   1
   0   8   2 3205.88 342.667   2
   0  -8  -2 2466.42 285.937   4
   0  -8  -3 3095.68 282.378   1
   0   8   3 3172.70 256.413   3
   0  -8  -3 2836.94 303.890   4
   0   8   3 3634.66 365.100   2
   0  -8  -4 1025.30 195.004   4
   0   8   4 807.663 186.019   2
   0  -8  -4 1299.18 187.955   1
   0   8   4 1131.12 155.132   3
   0  -8  -5 54.4508 100.016   4
   0   8   5 16.9535 68.5573   3
   0   8   5 153.144 110.478   2
   0  -8  -5 92.6392 75.7156   1
   0   8   6 127.991 77.7221   3
   0  -8  -6 46.7286 99.3075   4
   0  -8  -6 60.2637 69.5618   1
   0  -8  -7 211.613 103.991   4
   0   8   7 14.3422 91.7140   2
   0  -8  -7-108.194 91.3295   1
   0   8   7 25.0746 71.9947   3
   0  -8  -8 1286.80 165.902   3
   0   8   8 1212.19 216.810   2
   0  -8  -8 1044.25 200.727   4
   0  -8  -8 1302.54 188.960   1
   0   8   9 9472.39 570.519   2
   0  -8  -9 9793.82 445.270   3
   0  -8  -9 9614.62 563.369   4
   0   8   9 10085.7 512.468   1
   0   8  10 545.732 142.126   1
   0  -8 -10 448.911 151.919   4
   0  -8 -10 502.779 124.670   3
   0   8  10 589.242 176.538   2
   0  -8 -11 373.761 107.777   3
   0   8  11 564.518 138.746   1
   0  -8 -11 766.062 196.248   4
   0   8  11 858.222 196.722   2
   0  -8 -12 15808.9 747.660   4
   0   8  12 16331.8 659.458   1
   0  -8 -12 16886.5 589.404   3
   0   8  13 805.346 196.147   2
   0   8  13 1302.58 205.569   1
   0  -8 -13 1040.73 213.901   4
   0   8  14 1373.12 250.289   2
   0   8  14 1362.47 204.258   1
   0  -8 -14 1172.86 232.261   4
   0   8  15 7127.44 526.214   2
   0  -8 -15 7099.89 528.532   4
   0   8  15 6296.07 420.370   1
   0  -8 -16 483.625 187.076   4
   0   8  16 417.169 172.550   2
   0   8  16 318.924 131.717   1
   0  -8 -17 218.535 141.340   4
   0   8  17 70.2803 103.622   1
   0   8  18 348.247 164.479   2
   0   8  18 328.931 129.594   1
   0  -8 -18 334.435 153.962   4
   0   8  19 819.902 218.988   2
   0  -8 -19 844.118 214.846   4
   0  -8 -20-110.199 149.841   4
   0   8  20 173.223 143.103   2
   0  -8 -21 122.356 152.788   4
   0   8  21-103.708 149.441   2
   0   8  22 89.8933 145.214   2
   0   9 -14 698.302 218.828   2
   0   9 -13 133.828 147.850   3
   0   9 -13-169.953 152.025   2
   0   9 -12-68.1530 146.919   3
   0  -9  12 41.7583 137.410   1
   0   9 -12 73.3318 154.557   2
   0   9 -11 245.054 145.731   3
   0  -9  11-61.8199 134.885   1
   0   9 -11-30.1477 121.632   2
   0  -9  10-13.4850 141.736   1
   0   9 -10 62.9888 117.113   3
   0   9 -10 123.638 137.172   2
   0  -9   9-23.1133 113.876   1
   0   9  -9-34.9961 137.229   2
   0   9  -9-5.65334 109.345   3
   0   9  -8 122.199 120.041   3
   0   9  -8-96.0743 138.243   2
   0  -9   7 52.1765 115.053   1
   0   9  -7-19.2551 118.343   2
   0   9  -7 18.6470 101.585   3
   0  -9   7 9.70151 103.455   4
   0  -9   6 222.248 135.236   4
   0   9  -6 37.2414 136.290   2
   0  -9   6 47.3543 107.333   1
   0   9  -6-52.0454 96.1195   3
   0   9  -5-42.8323 109.298   2
   0  -9   5-60.5207 107.452   1
   0  -9   5 68.3769 91.6732   4
   0   9  -5-4.05884 100.148   3
   0  -9   4 84.5740 107.221   4
   0   9  -4-92.5112 95.8175   3
   0  -9   4-103.776 127.324   1
   0   9  -4-44.0890 100.687   2
   0   9  -3 84.0754 104.130   2
   0   9  -3 46.4706 98.6716   3
   0  -9   3-74.3458 111.477   4
   0  -9   3 109.136 115.159   1
   0   9  -2-45.2578 96.5182   3
   0  -9   2 148.092 116.207   4
   0   9  -2-51.5631 115.598   2
   0  -9   2-22.0852 85.8416   1
   0  -9   1 56.6058 105.639   4
   0   9  -1-4.02952 86.3164   3
   0   9  -1 91.2845 99.8646   2
   0  -9   1-196.702 136.408   1
   0  -9   0-72.4921 112.778   4
   0  -9   0-93.4426 101.509   1
   0   9   0 182.800 106.732   3
   0   9   0 146.253 137.199   2
   0  -9  -1-233.232 133.492   1
   0   9   1-49.7397 79.9005   3
   0   9   1 201.238 145.075   2
   0  -9  -1 82.8764 115.551   4
   0   9   2 16.5616 99.3233   2
   0  -9  -2-14.6232 87.3018   1
   0  -9  -2 112.907 116.298   4
   0   9   2 90.3468 87.4993   3
   0  -9  -3 34.5095 95.7156   4
   0   9   3 121.675 118.943   2
   0  -9  -3 0.30745 86.0028   1
   0   9   3 101.445 91.8709   3
   0  -9  -4 92.8975 106.330   1
   0  -9  -4 5.40791 93.1646   4
   0   9   4-42.6171 110.540   2
   0   9   4 3.64574 84.1886   3
   0   9   5 87.8371 116.734   2
   0  -9  -5 139.137 96.5920   1
   0  -9  -5 19.6892 99.2285   4
   0  -9  -6-50.8819 112.924   4
   0  -9  -6-22.9342 98.6950   1
   0   9   6 56.0299 96.4441   2
   0  -9  -7 84.3569 102.503   1
   0   9   7-222.539 144.474   2
   0  -9  -7-3.74043 102.489   4
   0  -9  -8-7.92412 84.5489   1
   0  -9  -8 198.291 134.696   4
   0   9   9 454.165 145.604   1
   0   9   9 501.616 181.148   2
   0  -9  -9 460.914 175.539   4
   0   9  10-3.36558 114.784   2
   0   9  10 33.9758 91.7619   1
   0  -9 -10-38.6600 123.736   4
   0   9  11-34.4900 138.256   2
   0  -9 -11-11.5217 111.384   4
   0   9  11 98.7665 110.858   1
   0   9  12 328.050 133.465   1
   0   9  12 352.739 159.420   2
   0  -9 -12 248.987 181.502   4
   0   9  13 61.4492 123.525   2
   0  -9 -13 92.4180 115.078   4
   0   9  13 8.78015 100.227   1
   0   9  14-39.5334 115.677   2
   0  -9 -14 81.4135 115.855   4
   0   9  15 114.069 145.478   2
   0  -9 -15 163.934 147.977   4
   0   9  16 287.019 166.465   2
   0  -9 -16-142.112 151.592   4
   0   9  17 157.378 174.551   2
   0  -9 -17 217.039 173.967   4
   0   9  18-528.010 217.426   2
   0  -9 -18 19.1925 127.189   4
   0 -10   8 1448.94 279.456   1
   0  10  -8 1293.95 298.379   2
   0 -10   7 992.360 232.262   1
   0  10  -7 894.396 261.973   2
   0 -10   6 350.065 180.077   1
   0  10  -6-39.4191 132.327   2
   0 -10   6 9.64206 125.287   4
   0 -10   5 326.956 156.572   1
   0  10  -5 113.105 131.668   2
   0 -10   5 382.955 156.178   4
   0 -10   4 260.538 144.235   1
   0 -10   4 201.582 132.833   4
   0  10  -4 244.058 157.961   2
   0 -10   3-43.5211 137.278   4
   0 -10   3 79.1751 108.157   1
   0  10  -3 262.165 173.794   2
   0  10  -2-97.9210 127.637   2
   0 -10   2-136.914 125.423   1
   0 -10   2-214.401 144.305   4
   0  10  -1 3071.32 375.884   2
   0 -10   1 2817.84 335.437   1
   0 -10   1 2619.10 327.545   4
   0  10   0 392.676 178.884   2
   0 -10   0 747.024 194.905   1
   0  10   1 1350.06 271.646   2
   0 -10  -1 1852.54 289.129   4
   0  10   2 36.3756 139.014   2
   0 -10  -2 189.074 150.173   4
   0 -10  -3 105.675 127.040   4
   0 -10  -3 221.275 130.533   1
   0  10   3 79.1838 140.289   2
   0 -10  -4 555.576 179.500   4
   0  10   4 920.142 224.647   2
   0 -10  -4 490.459 147.077   1
   0  10   5 347.983 168.109   2
   0 -10  -5 480.365 161.034   1
   0 -10  -5 273.083 155.728   4
   0  10   6 688.839 194.060   2
   0 -10  -6 318.457 165.442   4
   0 -10  -6 509.764 158.191   1
   0 -10  -7 333.954 159.069   4
   0  10   7 25.5967 137.566   2
   0 -10  -7 84.6492 110.058   1
   0  10   8 6918.82 574.817   2
   0 -10  -8 6385.27 535.048   4
   0  10   9 339.123 186.642   2
   0 -10  -9 430.211 185.106   4
   0  10  10 2970.91 389.793   2
   0 -10 -10 2339.49 324.804   4
   0  10  11 4434.60 466.953   2
   0 -10 -11 4215.63 452.191   4
   0 -10 -12 201.258 168.512   4
   0  10  12 251.437 171.815   2
   0 -11   2 275.560 156.342   1
   0 -11   2 12.5351 130.737   4
   0 -11   1 67.7512 142.070   4
   0 -11   1-37.5550 124.406   1
   0 -11   0 311.027 184.171   4
   0 -11   0 189.174 174.519   1
   0 -11  -1 196.165 158.504   4
  -1  10  11 761.013 231.113   2
   1 -10 -11 871.737 236.555   4
   1 -10 -10 332.847 152.798   4
  -1  10  10-26.2020 125.209   2
   1 -10  -9 1190.48 260.274   4
  -1  10   9 1606.53 303.175   2
  -1  10   8 335.724 164.412   2
   1 -10  -8 701.264 208.485   4
  -1  10   7 1402.54 284.991   2
   1 -10  -7 796.221 205.211   4
  -1  10   6 629.681 208.473   2
   1 -10  -6 320.503 157.245   4
  -1  10   5-9.64834 131.900   2
   1 -10  -5 122.647 159.297   4
   1 -10  -4 414.867 171.974   4
  -1  10   4 444.814 171.673   2
   1 -10  -3 276.696 142.554   4
  -1  10   3 653.994 208.025   2
  -1  10   2 4242.51 439.324   2
   1 -10  -2 4095.82 429.254   4
  -1  10   1 637.505 213.371   2
   1 -10  -1 228.953 128.384   4
  -1  10   1 523.944 169.555   3
  -1  10   0-55.0030 104.823   3
  -1  10   0-130.675 144.397   2
   1 -10   0-93.5208 153.254   4
   1 -10   1 339.020 163.277   1
  -1  10  -1 200.304 149.239   2
   1 -10   1 277.150 139.446   4
  -1  10  -1 248.722 135.957   3
   1 -10   2 441.750 171.671   4
   1 -10   2 344.458 160.741   1
  -1  10  -2 324.548 162.463   3
  -1  10  -2 372.975 168.390   2
   1 -10   3 215.412 135.776   1
  -1  10  -3 638.404 203.327   2
   1 -10   3 367.452 174.865   4
   1 -10   4 457.214 187.533   4
  -1  10  -4 539.980 173.519   3
  -1  10  -4 793.273 225.247   2
   1 -10   5 1834.92 286.856   1
  -1  10  -5 1983.84 313.899   2
  -1  10  -5 1639.54 264.317   3
   1 -10   5 1606.15 281.575   4
  -1  10  -6 87.3773 136.926   3
   1 -10   6 482.087 177.539   4
   1 -10   6 569.706 195.048   1
  -1  10  -7 83.5803 147.678   2
   1 -10   7 33.9371 121.285   1
   1 -10   7-49.3215 133.752   4
  -1  10  -7 2.10402 122.441   3
   1 -10   8 977.030 221.186   1
  -1  10  -8 945.954 245.844   2
  -1  10  -8 1537.96 269.092   3
  -1  10  -9 711.344 207.414   3
   1  -9 -17 90.5843 131.649   4
  -1   9  17 182.216 153.793   2
  -1   9  16 107.105 150.243   2
   1  -9 -16 74.3226 125.222   4
  -1   9  15 75.4123 130.170   2
   1  -9 -15-63.0210 139.403   4
  -1   9  14 77.9490 122.284   2
   1  -9 -14-101.723 158.795   4
   1  -9 -13-239.538 159.865   4
  -1   9  13-31.1731 136.169   2
   1  -9 -12 673.096 203.378   4
  -1   9  12 1396.51 255.513   2
   1  -9 -11 1072.15 196.286   3
   1  -9 -11 1178.04 235.250   4
  -1   9  11 1153.90 238.439   2
   1  -9 -10 148.036 99.4840   3
  -1   9  10 53.0512 146.345   2
   1  -9 -10 45.0215 100.884   4
  -1   9   9 1866.11 300.688   2
   1  -9  -9 1288.63 239.866   4
   1  -9  -9 1778.15 241.250   3
   1  -9  -8 440.125 167.335   4
  -1   9   8 358.024 161.019   2
  -1   9   7-95.3478 86.8762   3
  -1   9   7-26.0683 103.841   2
   1  -9  -7-120.156 134.778   4
   1  -9  -6-119.929 102.151   1
   1  -9  -6 188.496 140.729   4
  -1   9   6-79.5936 113.632   2
  -1   9   6 75.8115 101.181   3
   1  -9  -5 525.475 127.917   1
  -1   9   5 478.032 126.668   3
   1  -9  -5 152.452 118.024   4
  -1   9   5 591.617 186.607   2
  -1   9   4 80.3767 96.2627   3
  -1   9   4-100.780 133.218   2
   1  -9  -4 149.099 140.119   4
   1  -9  -4 77.6969 84.9789   1
   1  -9  -3-38.1495 111.793   4
   1  -9  -3 181.086 115.382   1
  -1   9   3 61.7938 94.1437   3
  -1   9   3-20.7007 116.475   2
   1  -9  -2-139.246 130.716   4
  -1   9   2-183.581 154.671   2
   1  -9  -2-47.9687 94.9285   1
  -1   9   2 25.1199 95.5062   3
   1  -9  -1 720.954 152.113   1
   1  -9  -1 1000.02 207.922   4
  -1   9   1 852.616 185.946   2
  -1   9   1 846.717 174.923   3
   1  -9   0 46.2764 81.7755   1
   1  -9   0-63.3634 122.767   4
  -1   9   0 129.170 123.466   2
  -1   9   0 322.338 134.973   3
  -1   9  -1 2431.81 313.512   2
   1  -9   1 1859.54 265.511   4
  -1   9  -1 2734.41 298.031   3
   1  -9   1 2415.86 275.149   1
  -1   9  -2 467.058 147.489   3
   1  -9   2 206.044 126.267   1
   1  -9   2 244.351 140.517   4
  -1   9  -2 252.865 136.612   2
  -1   9  -3-149.507 123.763   3
   1  -9   3-58.3270 84.1191   1
  -1   9  -3-82.7582 121.869   2
   1  -9   4 192.615 122.943   1
  -1   9  -4 229.491 127.254   3
  -1   9  -4-98.2594 118.675   2
   1  -9   4-44.3066 105.652   4
  -1   9  -5 167.402 132.811   2
   1  -9   5 391.693 154.047   4
   1  -9   5 351.946 143.208   1
  -1   9  -5 394.134 137.822   3
   1  -9   6 564.296 171.398   4
   1  -9   6 661.723 179.067   1
  -1   9  -6 322.001 133.650   2
  -1   9  -6 615.274 185.164   3
   1  -9   7 924.959 208.468   1
  -1   9  -7 426.876 154.661   3
  -1   9  -7 643.745 185.488   2
   1  -9   7 679.707 182.930   4
   1  -9   8 1448.30 254.124   4
  -1   9  -8 2447.24 316.861   3
  -1   9  -8 2355.43 316.875   2
   1  -9   8 2309.60 296.399   1
   1  -9   9-99.7410 135.140   1
   1  -9   9 150.438 129.797   4
  -1   9  -9 118.295 117.560   2
  -1   9  -9 152.754 136.060   3
  -1   9 -10 49.1122 135.477   3
   1  -9  10-8.39836 112.426   4
  -1   9 -10 341.964 167.171   2
   1  -9  10 77.5077 133.281   1
   1  -9  11 307.533 170.607   1
  -1   9 -11 100.014 116.868   2
   1  -9  11-66.3931 147.986   4
  -1   9 -11-107.810 123.936   3
   1  -9  12 470.663 188.324   1
  -1   9 -12 311.665 183.752   3
  -1   9 -13 668.258 225.585   3
   1  -8 -21 146.320 159.433   4
  -1   8  20-96.1252 128.328   2
   1  -8 -20-51.9032 146.303   4
   1  -8 -19 1.31181 112.104   4
  -1   8  19-8.85653 120.855   2
  -1   8  18 230.513 155.498   2
   1  -8 -18-44.7989 120.554   4
  -1   8  17 412.004 179.247   2
   1  -8 -17 147.105 107.219   3
   1  -8 -17 161.487 140.115   4
   1  -8 -16 130.986 111.589   3
  -1   8  16-53.7457 117.465   2
   1  -8 -16-135.213 142.866   4
   1  -8 -15 2244.61 302.633   4
   1  -8 -15 1849.14 246.279   3
  -1   8  15 1392.77 255.248   2
   1  -8 -14 141.166 107.957   3
   1  -8 -14 303.447 130.090   4
  -1   8  14 86.9285 108.250   2
   1  -8 -13 515.974 172.746   4
  -1   8  13 434.437 163.291   2
   1  -8 -13 158.499 102.719   3
  -1   8  12 524.138 177.263   2
   1  -8 -12 573.663 179.290   4
   1  -8 -12 414.651 136.163   3
   1  -8 -11 1907.62 278.652   4
  -1   8  11 1726.91 196.729   1
   1  -8 -11 1650.46 219.418   3
  -1   8  11 1777.79 271.752   2
   1  -8 -10 1622.26 214.340   3
  -1   8  10 1895.01 212.645   1
  -1   8  10 1805.78 268.138   2
   1  -8 -10 1186.26 223.423   4
  -1   8   9 683.473 136.301   1
   1  -8  -9 649.042 167.146   4
  -1   8   9 668.591 176.244   2
   1  -8  -9 928.112 174.842   3
  -1   8   8 1983.99 212.634   1
   1  -8  -8 1712.67 259.169   4
  -1   8   8 1806.19 213.697   3
  -1   8   8 2032.48 276.428   2
  -1   8   7 887.541 164.486   3
   1  -8  -7 833.935 185.066   4
  -1   8   7 1040.62 214.410   2
   1  -8  -7 685.817 129.857   1
   1  -8  -6 862.366 143.731   1
  -1   8   6 1372.60 234.489   2
   1  -8  -6 668.353 168.771   4
  -1   8   6 1175.62 175.523   3
  -1   8   5 1384.50 192.203   3
   1  -8  -5 1458.38 235.427   4
  -1   8   5 1149.14 204.332   2
   1  -8  -5 1177.68 166.984   1
  -1   8   4-46.3543 87.8976   3
   1  -8  -4 81.1420 104.711   4
  -1   8   4 84.5644 89.3492   2
   1  -8  -4 63.1550 68.2773   1
  -1   8   3 2330.25 283.410   2
  -1   8   3 2655.55 265.157   3
   1  -8  -3 2551.67 283.682   4
   1  -8  -3 2954.41 264.071   1
  -1   8   2 994.637 169.583   3
  -1   8   2 746.143 163.365   2
   1  -8  -2 768.165 146.151   1
   1  -8  -2 828.327 176.093   4
  -1   8   1 107.588 93.9779   3
   1  -8  -1-14.0988 93.8152   4
   1  -8  -1 49.6666 83.4561   1
  -1   8   1 60.7601 85.8443   2
  -1   8   0 1637.37 240.673   2
   1  -8   0 1856.22 224.461   1
   1  -8   0 1463.88 220.033   4
  -1   8   0 1889.96 230.617   3
  -1   8  -1 1822.15 255.422   2
   1  -8   1 1633.65 238.042   4
   1  -8   1 1967.91 227.169   1
  -1   8  -1 1991.65 243.335   3
  -1   8  -2 475.596 148.482   3
   1  -8   2 214.498 117.263   4
  -1   8  -2 387.637 144.352   2
   1  -8   2 143.888 86.1224   1
  -1   8  -3 152.958 83.9848   3
   1  -8   3 130.642 88.3036   4
  -1   8  -3 496.504 153.803   2
   1  -8   3 424.413 134.492   1
  -1   8  -4 3594.82 327.557   3
  -1   8  -4 2806.57 310.471   2
   1  -8   4 3085.83 295.773   1
   1  -8   4 3142.32 313.925   4
   1  -8   5 75.0076 89.3513   1
   1  -8   5 258.106 108.142   4
  -1   8  -5 331.441 138.857   2
  -1   8  -5 249.287 105.285   3
   1  -8   6 1036.80 199.074   4
  -1   8  -6 1247.70 206.461   3
   1  -8   6 1117.17 198.417   1
  -1   8  -6 1145.75 214.237   2
   1  -8   7-128.778 109.089   4
  -1   8  -7 117.215 109.924   2
   1  -8   7 183.759 100.787   1
  -1   8  -7 349.083 142.946   3
  -1   8  -8 464.565 153.309   2
   1  -8   8-30.3493 88.8586   4
   1  -8   8 345.051 137.055   1
  -1   8  -8 79.6644 110.980   3
  -1   8  -9 359.198 151.740   2
   1  -8   9 661.653 170.371   1
  -1   8  -9 374.901 145.173   3
   1  -8   9 403.289 143.001   4
  -1   8 -10 614.572 185.953   3
   1  -8  10 802.900 187.835   1
  -1   8 -10 758.990 204.831   2
   1  -8  10 674.927 179.108   4
   1  -8  11 747.347 180.679   4
  -1   8 -11 473.080 154.163   3
  -1   8 -11 923.727 203.040   2
   1  -8  11 1069.57 235.287   1
  -1   8 -12 269.833 140.293   3
   1  -8  12-35.1720 108.211   4
  -1   8 -12-98.7749 119.721   2
  -1   8 -13 1170.66 224.650   2
   1  -8  13 1345.96 244.547   4
   1  -8  13 1528.57 273.073   1
  -1   8 -13 1384.36 260.927   3
   1  -8  14 251.153 162.971   1
  -1   8 -14-10.6191 122.135   3
   1  -8  15 352.182 158.143   1
  -1   8 -15 100.169 123.263   3
   1  -7 -24 244.617 168.203   4
   1  -7 -23-146.306 144.496   4
   1  -7 -23 128.685 132.663   3
  -1   7  23-45.3122 143.655   2
  -1   7  22 245.629 165.421   2
   1  -7 -22 12.0988 105.231   3
   1  -7 -22 226.885 156.042   4
   1  -7 -21 16.0098 110.254   3
  -1   7  21 243.503 159.152   2
   1  -7 -21-42.2948 140.879   4
  -1   7  20 266.840 140.074   2
   1  -7 -20 162.730 147.185   4
   1  -7 -20 173.894 137.466   3
   1  -7 -19 1729.78 272.845   4
  -1   7  19 1800.18 297.636   2
   1  -7 -19 1460.85 234.968   3
   1  -7 -18 17.5848 95.3943   3
   1  -7 -18-87.5196 125.112   4
  -1   7  18-133.509 130.400   2
  -1   7  17 13.2680 103.207   2
   1  -7 -17-18.3277 83.8968   3
   1  -7 -17 41.2701 96.0656   4
  -1   7  16 1241.88 169.866   1
  -1   7  16 1526.00 257.562   2
   1  -7 -16 1680.10 233.760   3
   1  -7 -16 840.767 181.730   4
   1  -7 -15 238.963 115.345   4
   1  -7 -15 277.217 137.041   3
  -1   7  15 404.053 149.580   2
  -1   7  15 470.049 111.726   1
   1  -7 -14 29.3813 95.2352   4
  -1   7  14-107.747 122.892   2
  -1   7  14-8.18900 75.2164   1
   1  -7 -14 35.4792 84.7312   3
   1  -7 -13 1317.46 228.355   4
  -1   7  13 916.588 195.152   2
  -1   7  13 1061.04 151.092   1
   1  -7 -13 829.251 158.821   3
   1  -7 -12 51.3228 85.3875   3
  -1   7  12 234.860 144.382   2
  -1   7  12 204.558 91.4763   1
   1  -7 -12 137.766 119.543   4
  -1   7  11 678.546 179.635   2
   1  -7 -11 516.923 142.245   3
  -1   7  11 397.446 105.615   1
   1  -7 -11 377.821 129.901   4
  -1   7  10 3114.50 315.505   2
  -1   7  10 3331.26 252.498   1
   1  -7 -10 3479.34 289.579   3
   1  -7 -10 3460.07 331.717   4
   1  -7  -9 1838.18 233.839   4
   1  -7  -9 2465.79 241.706   3
  -1   7   9 2047.24 199.115   1
  -1   7   9 1587.42 228.547   2
  -1   7   8-7.38960 71.0322   3
  -1   7   8 66.0095 59.6486   1
   1  -7  -8 166.209 119.933   4
  -1   7   8-105.524 97.6019   2
   1  -7  -7 109.750 69.4329   1
  -1   7   7 68.6705 71.0703   3
   1  -7  -7 90.1828 104.605   4
  -1   7   7 37.7358 78.9511   2
   1  -7  -6 1286.18 157.802   1
  -1   7   6 1159.61 162.189   3
   1  -7  -6 1422.78 206.669   4
  -1   7   6 1308.98 211.244   2
  -1   7   5 142.818 75.7180   3
   1  -7  -5 320.116 86.0490   1
   1  -7  -5 89.3720 87.1391   4
  -1   7   4 43.2758 81.5884   2
  -1   7   4 136.277 68.3047   3
   1  -7  -4 259.263 107.596   4
   1  -7  -4 206.016 86.0596   1
  -1   7   3 756.674 144.597   3
   1  -7  -3 935.331 139.742   1
   1  -7  -3 920.281 171.229   4
  -1   7   3 798.228 159.942   2
  -1   7   2 443.257 109.806   3
   1  -7  -2 846.604 143.547   1
  -1   7   2 784.293 154.317   2
   1  -7  -2 776.727 160.867   4
   1  -7  -1 172.995 79.9158   1
  -1   7   1 7.03065 68.6546   3
  -1   7   1 63.5320 100.288   2
   1  -7  -1 7.00985 76.5984   4
   1  -7   0 2601.48 237.905   1
   1  -7   0 2517.39 270.727   4
  -1   7   0 2363.24 256.447   2
  -1   7   0 2929.40 263.504   3
  -1   7  -1 226.119 110.480   2
  -1   7  -1 232.866 101.264   3
   1  -7   1-64.3392 92.8778   1
   1  -7   1 186.286 80.6120   4
  -1   7  -2-15.5799 77.9373   3
   1  -7   2-92.0696 63.4711   1
  -1   7  -2 216.598 108.144   2
   1  -7   2-42.2390 106.163   4
  -1   7  -3 40.5792 87.2938   2
   1  -7   3-85.9781 80.4769   1
   1  -7   3-29.3208 92.3593   4
  -1   7  -3 236.646 108.286   3
  -1   7  -4 363.452 136.322   2
  -1   7  -4 390.063 117.542   3
   1  -7   4 296.854 117.673   4
   1  -7   4 139.442 84.6086   1
   1  -7   5 459.848 111.453   1
  -1   7  -5 832.828 172.768   3
   1  -7   5 628.016 154.795   4
  -1   7  -5 583.311 154.183   2
  -1   7  -6 1364.23 213.828   3
   1  -7   6 1003.90 174.020   1
   1  -7   6 993.830 177.774   4
  -1   7  -6 1135.45 194.058   2
  -1   7  -7 1913.40 250.783   3
   1  -7   7 2486.69 259.030   1
   1  -7   7 1720.80 220.866   4
  -1   7  -7 2066.61 252.944   2
   1  -7   8 225.717 114.885   4
  -1   7  -8 76.5465 91.1304   2
  -1   7  -8-15.3318 91.7926   3
   1  -7   8 46.4668 80.5151   1
  -1   7  -9 613.645 146.332   2
   1  -7   9 416.232 132.991   4
   1  -7   9 609.131 157.412   1
  -1   7  -9 710.554 169.389   3
   1  -7  10 1142.19 193.486   4
   1  -7  10 999.553 187.714   1
  -1   7 -10 1123.72 198.365   2
  -1   7 -10 1551.74 252.095   3
  -1   7 -11 57.0101 107.175   3
   1  -7  11 319.243 124.215   4
   1  -7  11 88.5095 109.575   1
  -1   7 -11-57.2160 112.843   2
  -1   7 -12 675.938 191.345   3
   1  -7  12 478.823 152.075   1
   1  -7  12 336.120 133.765   4
  -1   7 -12 473.015 147.396   2
   1  -7  13 758.270 182.317   4
  -1   7 -13 1120.12 233.736   3
   1  -7  13 889.470 201.980   1
  -1   7 -13 546.845 149.433   2
  -1   7 -14 147.669 109.307   2
   1  -7  14-5.02384 112.522   1
   1  -7  14 238.508 137.747   4
  -1   7 -14 129.515 148.074   3
  -1   7 -15 168.589 120.089   2
  -1   7 -15 558.491 188.653   3
   1  -7  15 381.571 157.513   1
   1  -7  15 420.132 149.934   4
  -1   7 -16 2291.44 331.006   3
   1  -7  16 2125.39 313.622   1
  -1   7 -17 1328.44 275.466   3
   1  -7  17 1429.12 256.757   1
  -1   7 -18-100.629 134.935   3
   1  -7  18 150.081 136.346   1
   1  -6 -27 306.810 162.957   3
   1  -6 -27 47.3317 135.656   4
   1  -6 -26 1717.08 282.756   3
   1  -6 -26 2093.64 319.811   4
   1  -6 -25 1095.82 239.657   4
   1  -6 -25 1362.97 247.423   3
  -1   6  25 1358.60 265.779   2
   1  -6 -24 495.478 188.723   3
   1  -6 -24 218.091 138.324   4
  -1   6  24 56.8185 124.020   2
   1  -6 -23 354.271 147.094   3
   1  -6 -23 431.598 164.628   4
  -1   6  23 667.812 197.426   2
   1  -6 -22 3.13010 99.9012   3
  -1   6  22-174.536 137.336   2
   1  -6 -22 258.374 148.156   4
   1  -6 -21 86.4577 115.546   4
   1  -6 -21 256.030 122.698   3
  -1   6  21 282.786 163.487   2
  -1   6  20 240.291 131.882   2
   1  -6 -20 246.806 123.829   4
   1  -6 -20 183.436 110.743   3
   1  -6 -19 122.549 112.262   3
  -1   6  19 263.679 127.755   2
   1  -6 -19 247.327 131.556   4
  -1   6  19 244.792 108.441   1
  -1   6  18 89.9706 104.462   2
  -1   6  18 145.565 87.5547   1
   1  -6 -18 271.832 114.674   3
   1  -6 -18 365.871 130.234   4
   1  -6 -17 191.741 122.337   4
   1  -6 -17 120.733 101.896   3
  -1   6  17 137.263 116.326   2
  -1   6  17 163.563 87.0751   1
  -1   6  16 18589.2 770.235   2
   1  -6 -16 16855.3 705.275   4
  -1   6  16 17481.1 587.973   1
   1  -6 -16 17167.8 660.865   3
   1  -6 -15 126.748 105.242   4
   1  -6 -15 375.595 126.403   3
  -1   6  15 292.273 90.0030   1
  -1   6  15 157.114 103.461   2
   1  -6 -14-140.796 112.933   4
  -1   6  14 5.35362 106.713   2
  -1   6  14-68.5057 74.9545   1
   1  -6 -14-72.8579 97.3758   3
   1  -6 -13 17478.8 632.143   3
   1  -6 -13 17054.7 681.167   4
  -1   6  13 17602.5 543.135   1
  -1   6  13 17818.6 723.384   2
  -1   6  12 872.693 130.786   1
   1  -6 -12 1054.01 168.311   3
   1  -6 -12 597.648 140.062   4
  -1   6  12 993.742 190.091   2
   1  -6 -11-21.9323 75.8304   4
   1  -6 -11 67.5237 73.4460   3
  -1   6  11 1.94361 58.1856   1
  -1   6  11-26.1688 83.1132   2
  -1   6  10 4219.33 342.801   2
   1  -6 -10 4083.69 323.967   4
  -1   6  10 4256.66 257.169   1
   1  -6 -10 3850.58 283.671   3
   1  -6  -9-41.7524 80.5449   4
   1  -6  -9 55.4942 77.9047   3
  -1   6   9 5.50059 54.6157   1
  -1   6   9-25.3196 77.6450   2
  -1   6   8 37.8515 81.1609   2
  -1   6   8 56.0425 55.5414   1
  -1   6   8 41.9078 65.2629   3
   1  -6  -7 4213.53 317.545   4
  -1   6   7 4394.18 336.283   2
  -1   6   7 4588.24 289.984   3
   1  -6  -6 172.665 65.6837   1
  -1   6   6 33.9255 75.5826   2
  -1   6   6 114.012 61.6294   3
   1  -6  -6 176.151 93.5739   4
  -1   6   5 446.703 120.115   2
  -1   6   5 532.297 114.455   3
   1  -6  -5 572.550 101.282   1
   1  -6  -5 445.078 118.312   4
   1  -6  -4-106.002 81.7955   4
   1  -6  -4 167.289 71.9912   1
  -1   6   4 96.2641 70.3956   3
  -1   6   4 207.719 106.780   2
  -1   6   3 4328.12 318.535   2
   1  -6  -3 4733.96 260.736   1
   1  -6  -3 4028.04 303.106   4
  -1   6   3 4051.60 270.953   3
   1  -6  -2-38.6586 68.0286   4
  -1   6   2 38.5712 70.7944   2
   1  -6  -2-37.1962 66.4331   1
  -1   6   2 205.272 87.0237   3
  -1   6   1 1576.44 181.550   3
   1  -6  -1 1489.97 193.755   4
   1  -6  -1 1694.50 170.651   1
  -1   6   1 1318.93 181.184   2
  -1   6   0 177.761 82.7859   3
   1  -6   0 115.503 60.4512   1
  -1   6   0 120.682 72.2655   2
   1  -6   0 179.942 93.2185   4
   1  -6   1 518.004 109.295   1
  -1   6  -1 417.029 120.641   2
   1  -6   1 197.822 87.1664   4
  -1   6  -1 269.753 92.0462   3
  -1   6  -2 588.448 132.483   2
   1  -6   2 479.886 113.908   4
   1  -6   2 754.824 129.321   1
  -1   6  -2 795.081 145.238   3
   1  -6   3 2432.04 218.116   1
  -1   6  -3 2735.66 250.800   2
   1  -6   3 2468.02 244.664   4
  -1   6  -3 2499.15 240.372   3
  -1   6  -4 840.133 151.548   2
  -1   6  -4 1094.26 167.229   3
   1  -6   4 1227.98 176.063   4
   1  -6   4 1051.45 158.501   1
   1  -6   5 748.899 136.556   1
  -1   6  -5 764.787 142.725   3
  -1   6  -5 717.149 144.948   2
   1  -6   5 824.380 146.698   4
  -1   6  -6-8.46526 71.6870   2
   1  -6   6 111.212 81.9502   1
   1  -6   6-4.05741 73.7906   4
  -1   6  -6 95.8274 81.5150   3
  -1   6  -7 1904.65 214.023   2
  -1   6  -7 1912.92 231.314   3
   1  -6   7 2246.12 237.533   1
   1  -6   7 2088.28 228.942   4
  -1   6  -8 1292.08 196.075   3
   1  -6   8 1285.16 190.019   4
  -1   6  -8 1458.27 192.984   2
   1  -6   8 1289.93 184.913   1
  -1   6  -9 673.569 136.949   2
   1  -6   9 714.083 145.295   4
   1  -6   9 799.038 150.887   1
  -1   6  -9 772.371 160.781   3
  -1   6 -10 1513.01 222.424   3
   1  -6  10 1948.12 240.027   1
  -1   6 -10 1887.21 220.629   2
   1  -6  10 1552.33 203.491   4
   1  -6  11 329.227 118.006   4
  -1   6 -11 253.587 103.469   2
  -1   6 -11 259.866 117.027   3
   1  -6  11-11.8286 77.4381   1
  -1   6 -12 872.453 183.351   3
   1  -6  12 910.370 188.246   1
   1  -6  12 1424.83 210.587   4
  -1   6 -12 876.772 162.158   2
  -1   6 -13 1723.47 251.408   3
   1  -6  13 1213.61 208.230   1
  -1   6 -13 1335.64 199.973   2
   1  -6  13 1416.56 210.570   4
  -1   6 -14 59.8200 94.4576   2
   1  -6  14-28.6345 98.4047   1
  -1   6 -14-155.104 115.848   3
   1  -6  14-13.7517 82.5060   4
  -1   6 -15 1106.48 183.420   2
  -1   6 -15 1896.23 283.023   3
   1  -6  15 1875.21 268.713   1
   1  -6  15 1388.07 216.248   4
   1  -6  16 1181.60 208.952   4
   1  -6  16 1294.30 238.004   1
  -1   6 -16 1711.38 273.332   3
   1  -6  17 171.231 129.482   4
   1  -6  17-13.3668 102.350   1
  -1   6 -17 138.240 128.161   3
  -1   6 -18 294.543 163.525   3
   1  -6  18 65.2176 127.877   1
   1  -6  19 2194.13 330.952   1
  -1   6 -19 1974.25 318.080   3
   1  -6  20 9.41632 148.511   1
  -1   6 -20 90.2172 131.531   3
   1  -5 -27 2132.66 310.457   4
  -1   5  27 1890.94 306.994   2
   1  -5 -27 2086.16 320.536   3
   1  -5 -26 64.4669 136.047   3
  -1   5  26-71.6712 127.987   2
   1  -5 -26-386.502 188.181   4
   1  -5 -25 56.4219 123.081   3
  -1   5  25 68.1724 122.592   2
   1  -5 -25 85.4240 129.565   4
  -1   5  24-53.8944 125.856   2
   1  -5 -24-87.3057 130.569   3
   1  -5 -24 132.670 123.692   4
  -1   5  23 307.664 130.548   2
   1  -5 -23 195.775 123.837   3
   1  -5 -23 447.036 157.977   4
  -1   5  23 154.818 102.889   1
   1  -5 -22 36.4515 103.733   4
  -1   5  22-64.6435 113.873   2
   1  -5 -22-93.9667 131.905   3
  -1   5  22 116.484 101.352   1
  -1   5  21 30.5128 107.242   2
   1  -5 -21 97.7661 130.121   3
  -1   5  21 40.5029 75.9900   1
   1  -5 -21 161.201 119.137   4
  -1   5  20 1801.16 257.893   2
   1  -5 -20 1239.82 205.542   3
   1  -5 -20 1505.43 228.560   4
  -1   5  20 1758.76 214.173   1
   1  -5 -19 130.810 109.552   3
   1  -5 -19 113.311 90.2997   4
  -1   5  19 105.231 74.1194   1
  -1   5  19 71.0397 98.6837   2
   1  -5 -18-24.6936 74.5354   4
  -1   5  18 6.44303 95.6030   2
   1  -5 -18 170.785 103.417   3
  -1   5  18 28.0012 63.9733   1
  -1   5  17 2733.65 299.532   2
   1  -5 -17 2429.91 265.659   4
  -1   5  17 2254.58 215.629   1
   1  -5 -17 2362.47 259.119   3
   1  -5 -16 376.706 121.893   3
  -1   5  16 283.681 119.781   2
  -1   5  16 344.722 91.6212   1
   1  -5 -16 631.379 139.637   4
   1  -5 -15-4.14520 75.2418   4
   1  -5 -15 78.7779 91.7046   3
  -1   5  15-156.959 107.672   2
  -1   5  15 18.6374 62.5929   1
  -1   5  14 2011.36 235.402   2
  -1   5  14 2002.23 183.388   1
   1  -5 -14 1946.98 227.837   4
   1  -5 -14 1706.06 208.738   3
  -1   5  13 132.284 82.6907   2
  -1   5  13-36.1885 54.1031   1
   1  -5 -13 67.7686 85.3851   4
   1  -5 -13 152.030 93.2030   3
  -1   5  12 387.131 95.8742   1
   1  -5 -12 220.587 79.5177   3
   1  -5 -12 366.670 126.208   4
  -1   5  12 409.570 133.590   2
  -1   5  11 2143.56 177.466   1
  -1   5  11 2467.76 251.831   2
   1  -5 -11 2783.13 258.340   4
   1  -5 -11 2357.16 216.812   3
  -1   5  10 4304.51 238.143   1
  -1   5  10 4432.92 325.967   2
   1  -5 -10 4412.36 292.503   3
   1  -5 -10 4014.49 294.341   4
  -1   5   9 41.8997 49.7419   1
  -1   5   9 32.2085 72.3308   2
   1  -5  -9-60.5047 76.6621   4
   1  -5  -9 36.4382 66.9857   3
  -1   5   9 27.9670 49.0799   1
   1  -5  -8-75.2479 70.8951   3
  -1   5   8-16.6415 49.0577   1
  -1   5   8 83.9529 53.9341   1
  -1   5   8 66.2467 75.1059   2
   1  -5  -8 98.3077 71.5556   4
  -1   5   7 5225.22 251.306   1
  -1   5   7 4996.18 239.368   1
  -1   5   7 4793.81 319.704   2
   1  -5  -7 5488.81 329.834   4
  -1   5   7 5408.19 292.694   3
  -1   5   6 466.034 82.2452   1
  -1   5   6 621.602 118.655   2
   1  -5  -6 478.378 102.460   4
  -1   5   6 643.740 110.207   3
   1  -5  -6 816.426 99.6069   1
   1  -5  -5 687.842 92.4298   1
  -1   5   5 719.176 112.004   3
  -1   5   5 609.603 87.8556   1
   1  -5  -5 493.273 114.008   4
  -1   5   5 818.790 139.656   2
   1  -5  -4 1806.43 145.020   1
  -1   5   4 1704.36 183.398   2
   1  -5  -4 1798.23 188.433   4
  -1   5   4 1899.36 178.660   3
  -1   5   4 1896.36 147.040   1
  -1   5   3 36.4672 56.0334   3
  -1   5   3 33.6508 57.0432   2
  -1   5   3 13.6374 42.2790   1
   1  -5  -3-3.27597 41.0431   1
   1  -5  -3 66.4023 73.4368   4
   1  -5  -2-21.0601 67.0623   4
  -1   5   2 22.6051 65.1525   2
   1  -5  -2 31.2110 52.8832   1
  -1   5   2 43.5930 55.2643   3
  -1   5   2-5.31857 41.8608   1
   1  -5  -1 2795.23 228.016   4
  -1   5   1 2841.93 233.183   2
  -1   5   1 2764.54 217.730   3
   1  -5  -1 2726.45 188.839   1
  -1   5   0 116.093 82.8297   2
   1  -5   0 73.7382 52.5866   1
   1  -5   0 152.859 72.3676   4
  -1   5   0 83.0009 58.5762   3
  -1   5  -1 244.774 79.7929   2
  -1   5  -1 453.466 98.4002   3
   1  -5   1 319.039 81.2984   1
   1  -5   1 235.383 88.9958   4
   1  -5   2 2981.28 245.534   4
   1  -5   2 2597.74 198.355   1
  -1   5  -2 2695.10 229.703   2
  -1   5  -2 2667.35 222.478   3
  -1   5  -3 592.285 114.258   3
   1  -5   3 510.886 96.1314   1
   1  -5   3 525.956 107.529   4
  -1   5  -3 516.770 109.098   2
   1  -5   4 467.988 110.810   4
  -1   5  -4 622.208 116.664   2
  -1   5  -4 567.910 114.325   3
   1  -5   4 509.881 102.428   1
   1  -5   5 2273.60 211.700   4
  -1   5  -5 2401.02 222.687   3
   1  -5   5 2362.12 208.313   1
  -1   5  -5 2247.06 207.528   2
  -1   5  -6 1018.73 163.727   3
   1  -5   6 1299.57 163.960   1
   1  -5   6 1142.98 159.414   4
  -1   5  -6 1404.27 170.501   2
  -1   5  -7 130.579 65.5036   2
  -1   5  -7-62.1554 66.7449   3
   1  -5   7-5.68117 73.2301   1
   1  -5   7 74.8166 67.0282   4
  -1   5  -8 197.563 80.5548   2
   1  -5   8 154.502 95.8128   1
   1  -5   8 111.788 62.0503   4
  -1   5  -8 189.815 97.7565   3
  -1   5  -9 4487.44 332.562   3
   1  -5   9 4444.36 311.974   4
  -1   5  -9 4884.77 303.969   2
   1  -5   9 4956.92 331.862   1
  -1   5 -10 155.448 89.3044   2
  -1   5 -10 81.0793 86.8120   3
   1  -5  10 134.108 88.0947   4
   1  -5  10 18.4311 71.0084   1
  -1   5 -11-30.6735 67.2314   2
   1  -5  11 3.85640 72.0060   4
   1  -5  11 67.9749 83.2896   1
  -1   5 -11 16.2224 83.9092   3
  -1   5 -12 1159.07 200.649   3
   1  -5  12 844.554 155.806   4
  -1   5 -12 850.469 138.308   2
   1  -5  12 876.559 172.898   1
  -1   5 -13 379.428 130.057   3
   1  -5  13 803.580 147.421   4
   1  -5  13 302.737 114.122   1
  -1   5 -13 655.778 130.122   2
  -1   5 -14-101.955 108.203   3
   1  -5  14 59.8888 100.720   1
  -1   5 -14 35.3942 77.6419   2
   1  -5  14 87.3142 98.4716   4
   1  -5  15 5223.13 362.163   4
  -1   5 -15 5400.73 432.027   3
  -1   5 -15 6048.58 375.650   2
   1  -5  15 5738.95 433.712   1
  -1   5 -16 418.452 117.758   2
   1  -5  16 697.266 171.623   1
   1  -5  16 454.134 134.465   4
  -1   5 -16 516.785 150.918   3
  -1   5 -17 479.772 161.163   3
   1  -5  17 445.950 137.744   4
   1  -5  17 490.253 149.205   1
  -1   5 -17 287.167 116.774   2
  -1   5 -18 10786.8 522.797   2
  -1   5 -18 11940.7 673.600   3
   1  -5  18 11365.5 650.754   1
   1  -5  18 11154.8 558.010   4
  -1   5 -19 1834.82 287.971   3
   1  -5  19 1649.26 267.966   1
   1  -5  19 1514.13 222.942   4
  -1   5 -20-72.1512 119.112   3
   1  -5  20 353.583 155.427   1
  -1   5 -21 1240.42 272.919   3
   1  -5  21 758.545 211.544   1
  -1   5 -22 89.2645 167.949   3
   1  -5  22 79.5712 158.743   1
   1  -4 -28-53.3768 141.993   3
  -1   4  28 54.1193 127.023   2
  -1   4  27 130.670 133.222   2
   1  -4 -27 104.991 134.242   3
   1  -4 -26 243.781 156.949   3
  -1   4  26 322.315 165.775   2
   1  -4 -26 444.797 158.001   4
  -1   4  25 46.6951 124.777   1
  -1   4  25 319.588 174.733   2
   1  -4 -25 111.161 110.676   3
  -1   4  24-52.6561 85.6378   1
  -1   4  24-47.4968 107.575   2
   1  -4 -24-55.2960 99.3681   4
   1  -4 -24-39.6752 113.426   3
   1  -4 -23 61.2031 110.639   3
  -1   4  23 111.518 104.860   1
  -1   4  23 303.474 130.562   2
   1  -4 -23 174.339 126.960   4
   1  -4 -22 110.173 114.228   3
   1  -4 -22 2.73486 88.1917   4
  -1   4  22 216.804 122.980   2
  -1   4  22-103.094 100.890   1
   1  -4 -21 172.745 106.250   4
   1  -4 -21 5.72868 97.0155   3
  -1   4  21 74.3031 80.9095   1
  -1   4  21 170.418 101.081   2
   1  -4 -20 242.276 107.223   4
   1  -4 -20-21.9433 91.6146   3
  -1   4  20 315.468 141.836   2
  -1   4  20 75.2128 79.7889   1
  -1   4  19 149.407 82.9173   1
   1  -4 -19 62.2853 76.2632   4
   1  -4 -19 103.077 99.9564   3
  -1   4  19 179.131 111.686   2
   1  -4 -18 114.424 103.948   3
  -1   4  18 122.705 85.2048   1
   1  -4 -18-2.26822 73.8940   4
  -1   4  18 0.29153 83.7455   2
  -1   4  17 12241.2 481.480   1
  -1   4  17 13388.2 595.473   2
   1  -4 -17 13110.6 565.971   3
   1  -4 -17 12355.9 534.317   4
   1  -4 -16 149.832 89.8706   4
  -1   4  16 241.721 101.294   2
   1  -4 -16 170.546 108.025   3
  -1   4  16 358.222 95.3783   1
   1  -4 -15 185.060 103.709   3
   1  -4 -15 116.280 83.4257   4
  -1   4  15 43.8247 69.6496   2
  -1   4  15 57.4154 62.8091   1
   1  -4 -14 28419.9 760.312   3
   1  -4 -14 30727.1 789.489   4
  -1   4  14 28803.1 658.062   1
  -1   4  14 31035.8 851.924   2
  -1   4  13 31.8626 49.5391   1
   1  -4 -13 105.334 76.7413   3
  -1   4  13 34.6366 83.8033   2
   1  -4 -13-28.8447 74.8876   4
  -1   4  12 267.047 75.6040   1
   1  -4 -12 361.043 103.546   4
  -1   4  12 571.805 126.848   2
   1  -4 -12 330.613 103.006   3
   1  -4 -11 1013.59 147.964   4
  -1   4  11 976.128 161.913   2
   1  -4 -11 1094.00 142.127   3
  -1   4  11 1178.03 123.897   1
  -1   4  11 1178.19 125.234   1
  -1   4  10 3601.95 201.457   1
   1  -4 -10 3002.07 225.048   3
  -1   4  10 3588.96 270.615   2
  -1   4  10 3530.60 199.552   1
   1  -4 -10 3657.69 257.113   4
   1  -4  -9 3291.24 232.923   3
  -1   4   9 3600.31 193.838   1
  -1   4   9 3211.72 248.588   2
   1  -4  -9 3757.00 251.703   4
  -1   4   9 3485.46 189.498   1
   1  -4  -8 7315.18 334.226   3
  -1   4   8 7796.87 380.528   2
  -1   4   8 8649.34 285.540   1
   1  -4  -8 7904.79 361.771   4
  -1   4   8 7504.13 268.054   1
  -1   4   7 4112.75 196.823   1
   1  -4  -7 4327.12 265.440   4
  -1   4   7 4031.15 265.881   2
  -1   4   7 4087.78 192.727   1
  -1   4   6 577.891 75.6760   1
  -1   4   6 554.319 73.6442   1
  -1   4   6 557.942 96.8843   3
   1  -4  -6 628.481 108.346   4
  -1   4   6 703.997 124.581   2
  -1   4   5 9186.29 341.338   3
  -1   4   5 8666.80 374.404   2
  -1   4   5 9016.41 271.181   1
   1  -4  -5 8997.53 270.545   1
   1  -4  -5 8426.49 368.199   4
   1  -4  -4 6139.65 225.017   1
  -1   4   4 5881.18 274.467   3
  -1   4   4 6183.20 223.891   1
   1  -4  -4 6309.68 310.760   4
  -1   4   4 5786.76 302.001   2
   1  -4  -3 121.274 61.5365   4
  -1   4   3 101.503 64.3596   2
   1  -4  -3 170.684 46.5131   1
  -1   4   3 233.494 54.4186   1
  -1   4   3 185.228 69.9327   3
   1  -4  -2 68.9518 39.9869   1
   1  -4  -2-74.3754 65.1656   4
  -1   4   2 69.2383 66.7026   3
  -1   4   2 84.6483 43.3609   1
  -1   4   2 24.3836 52.0226   2
  -1   4   1 27056.3 620.914   2
   1  -4  -1 27137.1 630.569   4
  -1   4   1 28619.9 501.574   1
   1  -4  -1 28281.8 505.274   1
  -1   4   1 27619.7 595.255   3
   1  -4   0 6787.76 320.225   4
  -1   4   0 6955.64 306.880   3
   1  -4   0 7022.06 261.878   1
  -1   4   0 7181.49 265.228   1
  -1   4   0 6657.25 302.185   2
   1  -4   1 5630.21 293.083   4
  -1   4  -1 7169.27 318.399   3
   1  -4   1 6691.51 264.300   1
  -1   4  -1 7062.68 273.999   1
  -1   4  -1 5981.50 289.801   2
  -1   4  -2 135605. 1212.53   1
   1  -4   2 134538. 1225.23   1
   1  -4   2 134835. 1411.00   4
  -1   4  -2 139015. 1411.09   3
  -1   4  -2 132552. 1324.85   2
  -1   4  -3 97.5127 68.0544   2
  -1   4  -3 126.698 76.3982   3
   1  -4   3 190.025 72.6336   1
   1  -4   3 191.510 64.7216   4
  -1   4  -4 159.876 67.5124   3
   1  -4   4 228.636 72.9242   1
  -1   4  -4 238.636 73.3385   2
   1  -4   4 162.768 76.4956   4
  -1   4  -5 1513.41 147.635   2
   1  -4   5 1603.67 155.054   1
   1  -4   5 1690.78 177.682   4
  -1   4  -5 1663.02 169.914   3
   1  -4   6 566.879 97.5062   1
  -1   4  -6 779.942 137.507   3
  -1   4  -6 650.188 101.228   2
   1  -4   6 784.149 123.216   4
  -1   4  -7 82.6202 65.1621   2
   1  -4   7-119.980 75.7287   1
  -1   4  -7-116.704 61.4297   3
   1  -4   7-11.3451 52.4887   4
   1  -4   8 7699.60 365.121   4
  -1   4  -8 8774.01 418.604   3
  -1   4  -8 8078.96 346.761   2
   1  -4   8 8448.47 385.135   1
   1  -4   9 183.799 80.3699   1
  -1   4  -9-84.8418 81.5583   3
   1  -4   9 86.2138 75.7437   4
  -1   4  -9 147.744 71.7658   2
   1  -4  10 365.959 110.030   1
  -1   4 -10 234.799 83.4889   2
  -1   4 -10 321.398 100.190   3
   1  -4  10 297.224 94.3187   4
  -1   4 -11 30.6024 60.7635   2
  -1   4 -11 51.9356 73.2164   3
   1  -4  11-12.3861 59.2088   4
   1  -4  11 123.175 94.0624   1
  -1   4 -12 2863.51 225.676   2
   1  -4  12 2645.33 236.707   4
  -1   4 -12 2936.03 273.434   3
   1  -4  12 2960.44 272.523   1
   1  -4  13-10.6855 77.3093   4
  -1   4 -13 97.8909 76.0566   2
   1  -4  13 111.412 85.6866   1
  -1   4 -13 176.648 93.0297   3
   1  -4  14-22.6563 65.7052   4
   1  -4  14-176.379 107.343   1
  -1   4 -14 113.459 93.5800   3
  -1   4 -14-41.6052 63.6606   2
   1  -4  15 901.826 171.967   1
  -1   4 -15 855.206 137.729   2
  -1   4 -15 1108.52 200.786   3
   1  -4  15 692.556 137.699   4
  -1   4 -16 216.451 100.022   2
   1  -4  16 230.741 122.327   1
  -1   4 -16 246.318 103.217   3
   1  -4  16 337.235 110.453   4
   1  -4  17 1928.80 226.136   4
  -1   4 -17 1893.18 269.779   3
  -1   4 -17 1681.00 192.243   2
   1  -4  17 1730.62 231.572   1
  -1   4 -18 224.707 110.266   3
   1  -4  18 333.454 139.372   1
   1  -4  18 222.317 101.365   4
  -1   4 -19 164.102 98.2246   2
   1  -4  19 18.7635 90.5641   1
  -1   4 -19 276.639 166.961   3
   1  -4  19-157.039 113.826   4
   1  -4  20-9.92552 118.579   1
  -1   4 -20 45.1242 115.703   3
   1  -4  20 117.361 101.148   4
  -1   4 -21 19.7157 115.958   3
   1  -4  21 182.086 132.955   1
  -1   4 -22 275.366 162.478   3
   1  -4  22 413.064 158.982   1
  -1   4 -23 105.897 145.933   3
   1  -4  23 171.797 155.026   1
  -1   4 -24 137.849 167.060   3
   1  -4  24-10.7518 127.406   1
  -1   3  29 167.814 146.071   2
  -1   3  28 2415.88 336.818   2
   1  -3 -28 2656.08 365.086   3
  -1   3  28 2447.89 321.352   1
  -1   3  27 55.8223 117.528   2
  -1   3  27 112.681 117.882   1
   1  -3 -27 69.6761 145.220   3
  -1   3  26 396.162 166.471   2
   1  -3 -26 387.829 172.132   3
  -1   3  26 331.031 147.609   1
   1  -3 -25 109.101 98.3300   4
  -1   3  25 172.037 117.449   1
  -1   3  25 87.0099 111.135   2
   1  -3 -25 325.839 150.201   3
   1  -3 -24 299.311 124.155   4
  -1   3  24 564.839 151.307   1
  -1   3  24 366.792 136.056   2
   1  -3 -24 751.338 193.236   3
  -1   3  23 71.1704 82.8464   1
  -1   3  23 180.260 127.129   2
   1  -3 -23 148.761 99.0611   4
   1  -3 -23 124.935 108.746   3
   1  -3 -22-91.9841 129.738   3
   1  -3 -22-54.0866 89.5825   4
  -1   3  22 95.1548 96.7125   2
  -1   3  22-93.9291 110.885   1
   1  -3 -21 963.187 167.328   4
   1  -3 -21 480.118 144.498   3
  -1   3  21 692.419 167.673   2
  -1   3  21 591.783 141.201   1
   1  -3 -20 107.330 74.5064   4
   1  -3 -20 298.406 116.136   3
  -1   3  20 131.871 79.6747   1
   1  -3 -19-8.27767 73.2519   4
   1  -3 -19-28.2002 77.7952   3
  -1   3  19-20.9461 74.1291   1
  -1   3  19 217.600 117.554   2
  -1   3  18 1114.64 179.081   2
   1  -3 -18 1696.44 226.803   3
   1  -3 -18 1623.45 193.019   4
  -1   3  18 1435.86 176.947   1
   1  -3 -17 478.173 131.131   3
   1  -3 -17 423.396 110.343   4
  -1   3  17 333.388 90.3028   1
  -1   3  17 422.232 128.012   2
   1  -3 -16-63.3332 85.5175   3
  -1   3  16 65.8666 91.2453   2
   1  -3 -16-31.2628 74.0851   4
  -1   3  16 48.8462 60.6550   1
   1  -3 -15 5279.08 338.411   3
   1  -3 -15 5051.90 308.286   4
  -1   3  15 4836.45 332.925   2
  -1   3  15 5045.17 284.854   1
  -1   3  14 333.927 85.5504   1
   1  -3 -14 409.834 107.572   3
  -1   3  14 308.959 101.632   2
   1  -3 -14 376.172 94.0057   4
   1  -3 -13 82.8220 66.6668   4
   1  -3 -13 16.0732 67.0526   3
  -1   3  13-45.5494 75.6709   2
  -1   3  13-17.2590 45.6369   1
   1  -3 -12 13.3282 47.6998   1
   1  -3 -12 29.7574 53.3063   4
   1  -3 -12 70.7603 67.3745   3
  -1   3  12 164.911 90.3932   2
  -1   3  12 77.9851 53.3678   1
   1  -3 -11 6225.73 307.089   4
  -1   3  11 6128.74 260.263   1
   1  -3 -11 5769.96 311.351   3
   1  -3 -11 5767.01 251.445   1
  -1   3  11 6200.33 337.647   2
  -1   3  10 532.216 104.910   2
   1  -3 -10 527.961 84.8671   1
   1  -3 -10 514.978 100.199   3
   1  -3 -10 485.973 87.1895   4
  -1   3  10 457.350 76.8050   1
  -1   3   9 3149.43 167.241   1
   1  -3  -9 3130.79 212.276   4
   1  -3  -9 2856.05 210.198   3
  -1   3   9 3414.35 241.021   2
  -1   3   9 3424.21 175.035   1
   1  -3  -8 7321.43 318.696   3
  -1   3   8 8287.28 254.767   1
   1  -3  -8 7287.10 316.604   4
  -1   3   8 8356.32 254.800   1
  -1   3   7 3005.89 147.543   1
   1  -3  -7 3074.09 200.735   3
  -1   3   7 3086.31 148.543   1
   1  -3  -7 2988.53 202.060   4
  -1   3   7 2735.70 203.895   2
  -1   3   6 3119.61 211.199   2
  -1   3   6 3098.52 143.008   1
   1  -3  -6 3337.92 208.196   4
  -1   3   6 3142.33 141.826   1
   1  -3  -6 3368.37 208.733   3
   1  -3  -5 1344.02 135.691   4
  -1   3   5 1189.16 88.3797   1
   1  -3  -5 1170.95 123.524   3
  -1   3   5 1352.63 138.082   4
  -1   3   5 1420.35 149.859   2
  -1   3   5 1254.54 88.6437   1
  -1   3   5 1486.60 130.377   3
  -1   3   4 1093.30 125.297   2
   1  -3  -4 1057.16 126.393   2
   1  -3  -4 1142.32 127.936   4
   1  -3  -4 1009.59 110.329   3
   1  -3  -4 969.199 76.5235   1
  -1   3   4 1008.63 121.255   4
  -1   3   4 1039.09 77.4154   1
  -1   3   4 1015.92 117.752   3
  -1   3   3 885.508 114.711   2
   1  -3  -3 789.328 70.3149   1
  -1   3   3 767.916 99.5082   3
   1  -3  -3 709.391 95.6933   3
  -1   3   3 798.097 72.3545   1
   1  -3  -3 804.523 106.744   2
   1  -3  -3 601.578 96.7634   4
  -1   3   3 620.975 93.9436   4
  -1   3   2 1925.49 150.435   2
   1  -3  -2 1614.69 101.427   1
   1  -3  -2 1655.57 142.961   2
  -1   3   2 1843.21 105.775   1
   1  -3  -2 1817.65 146.149   3
  -1   3   2 1797.71 142.365   3
   1  -3  -2 1503.32 142.150   4
  -1   3   2 1807.60 152.683   4
  -1   3   1 56.0666 53.2773   3
   1  -3  -1 56.5455 35.1703   1
   1  -3  -1 55.3231 45.2468   3
  -1   3   1 69.7449 54.7760   4
  -1   3   1 5.32687 49.8570   2
   1  -3  -1 30.8845 43.7332   2
  -1   3   1 16.3441 32.4035   1
   1  -3  -1 12.5678 60.1633   4
   1  -3   0 7936.71 282.944   2
   1  -3   0 8031.13 292.745   3
  -1   3   0 7621.49 287.079   2
  -1   3   0 7827.89 233.704   1
  -1   3   0 7671.84 304.721   4
  -1   3   0 8135.30 300.160   3
   1  -3   0 7521.95 299.474   4
   1  -3   0 7747.64 233.188   1
  -1   3  -1 73804.5 909.513   3
   1  -3   1 71043.3 907.521   4
   1  -3   1 72307.5 822.822   2
  -1   3  -1 70878.8 835.093   2
  -1   3  -1 71385.4 727.007   1
   1  -3   1 70123.8 721.861   1
   1  -3   1 72277.4 885.186   3
  -1   3  -1 70471.0 905.254   4
  -1   3  -2 28144.8 568.389   4
  -1   3  -2 29003.1 527.791   2
   1  -3   2 29304.9 517.076   2
  -1   3  -2 30035.5 495.207   1
   1  -3   2 28342.5 573.272   3
   1  -3   2 29095.1 582.970   4
   1  -3   2 29158.4 494.983   1
  -1   3  -3-14.4886 44.6590   4
   1  -3   3 170.214 73.4871   4
   1  -3   3 92.6263 47.3009   1
  -1   3  -3 51.6012 55.6264   3
  -1   3  -3 103.568 51.3704   1
   1  -3   3 63.6653 54.4349   3
   1  -3   3 142.824 62.2570   2
  -1   3  -3 52.6809 47.3688   2
   1  -3   4 1294.88 124.691   1
  -1   3  -4 1222.61 133.167   4
  -1   3  -4 1202.21 132.682   3
  -1   3  -4 1308.02 118.935   2
   1  -3   4 1420.42 141.100   4
   1  -3   4 1351.64 117.679   2
  -1   3  -4 1170.79 117.385   1
   1  -3   5 1107.86 126.790   4
  -1   3  -5 1088.12 117.565   1
   1  -3   5 1283.06 130.488   1
  -1   3  -5 1097.80 111.249   2
  -1   3  -5 1146.35 137.576   3
   1  -3   5 1249.46 115.030   2
  -1   3  -6 470.290 78.8734   2
   1  -3   6 549.482 79.7576   2
  -1   3  -6 613.038 109.497   3
   1  -3   6 609.396 91.5529   1
   1  -3   6 553.919 98.4957   4
  -1   3  -7 1017.41 107.773   2
   1  -3   7 996.209 126.868   4
  -1   3  -7 991.332 110.483   2
  -1   3  -7 1098.85 136.675   3
   1  -3   7 841.295 110.972   1
   1  -3   8 8047.40 346.382   4
  -1   3  -8 8501.34 379.266   3
  -1   3  -8 8074.91 297.989   2
   1  -3   8 8218.02 359.355   1
  -1   3  -8 8395.02 297.554   2
   1  -3   9 47.5003 58.4726   4
   1  -3   9-66.5001 66.7143   1
  -1   3  -9-26.9092 64.1253   3
  -1   3  -9-55.4886 51.1601   2
  -1   3  -9-39.9447 40.1220   2
  -1   3 -10 194.123 68.6396   2
   1  -3  10 112.176 64.0049   1
  -1   3 -10 331.920 101.959   3
  -1   3 -10 212.791 63.0752   2
   1  -3  10 301.658 91.0252   4
   1  -3  11 518.850 101.461   4
   1  -3  11 221.347 95.5297   1
  -1   3 -11 411.266 113.412   3
  -1   3 -11 394.078 91.7829   2
   1  -3  12 1736.88 200.092   1
  -1   3 -12 1649.60 157.005   2
   1  -3  12 1645.01 176.766   4
  -1   3 -12 1963.55 218.699   3
   1  -3  13 238.408 102.289   1
   1  -3  13 214.007 82.1585   4
  -1   3 -13 283.854 107.414   3
  -1   3 -13 189.918 77.0516   2
  -1   3 -14 7774.17 445.656   3
   1  -3  14 7677.16 387.243   4
  -1   3 -14 7837.91 353.712   2
   1  -3  14 8080.22 439.546   1
  -1   3 -15 95.3951 103.622   3
   1  -3  15-31.8053 88.8385   1
   1  -3  15 4.24983 78.3652   4
  -1   3 -15-22.8311 59.9269   2
  -1   3 -16 773.617 156.425   3
   1  -3  16 796.661 161.276   1
  -1   3 -16 782.001 126.271   2
   1  -3  16 878.577 152.954   4
   1  -3  17 6358.74 440.213   1
   1  -3  17 7151.18 406.395   4
  -1   3 -17 6572.93 449.026   3
  -1   3 -17 6703.73 354.582   2
  -1   3 -18 3148.10 328.117   3
   1  -3  18 3094.39 273.873   4
   1  -3  18 3242.15 326.309   1
  -1   3 -18 3045.28 251.051   2
   1  -3  19 539.688 137.279   4
  -1   3 -19 434.838 115.701   2
   1  -3  19 501.644 153.469   1
  -1   3 -19 398.875 146.581   3
   1  -3  20 1016.18 177.868   4
  -1   3 -20 737.620 148.479   2
  -1   3 -20 861.776 185.295   3
   1  -3  20 762.971 177.228   1
   1  -3  21 632.163 177.801   1
  -1   3 -21 636.429 182.600   3
   1  -3  21 792.370 161.338   4
   1  -3  22 651.195 189.174   1
  -1   3 -22 246.111 141.800   3
   1  -3  22 396.240 131.233   4
  -1   3 -23 803.057 223.250   3
   1  -3  23 354.898 149.712   1
   1  -3  24 19.2545 112.508   1
  -1   3 -24 472.330 191.473   3
  -1   3 -25 207.922 168.118   3
   1  -3  25 66.2621 122.377   1
  -1   2  29 70.4696 158.991   1
  -1   2  29 335.028 164.208   2
  -1   2  28 515.677 194.955   1
   1  -2 -28 351.484 170.577   3
  -1   2  28 376.559 145.543   2
  -1   2  27 1397.66 259.701   2
  -1   2  27 1068.88 221.293   1
   1  -2 -27 754.129 218.762   3
  -1   2  26 189.547 137.676   1
  -1   2  26 649.160 186.473   2
   1  -2 -26 520.690 200.110   3
  -1   2  25 207.058 136.467   2
   1  -2 -25 116.963 110.258   3
  -1   2  25 334.295 145.238   1
   1  -2 -24 15.1402 80.8724   4
   1  -2 -24 66.1971 132.823   3
  -1   2  24 17.8861 91.8099   2
  -1   2  24 61.4968 90.1565   1
   1  -2 -23-231.172 112.565   4
   1  -2 -23-23.9393 104.584   3
  -1   2  23 19.9424 92.1670   2
  -1   2  23 141.518 102.889   1
   1  -2 -22 29.4166 88.8368   3
  -1   2  22 35.7203 84.5050   1
  -1   2  22-226.464 132.891   2
   1  -2 -22-0.69414 74.3578   4
   1  -2 -21 44.2365 66.8706   4
   1  -2 -21 76.2617 99.7389   3
  -1   2  21 35.5506 88.2225   1
  -1   2  21 108.630 108.121   2
   1  -2 -20-92.9638 111.322   3
   1  -2 -20 38.1340 69.9727   4
  -1   2  20-82.5542 96.1741   2
  -1   2  20 1.24560 72.3860   1
   1  -2 -19-24.1378 66.5448   4
   1  -2 -19-24.3108 94.7679   3
  -1   2  19-48.7228 79.4505   2
  -1   2  19 53.6331 83.5106   1
   1  -2 -18 280.875 93.8201   4
  -1   2  18 418.671 124.070   2
   1  -2 -18 120.468 78.9719   3
  -1   2  18 304.322 100.346   1
   1  -2 -17 95.0112 60.2435   4
  -1   2  17-2.36095 86.0096   2
   1  -2 -17 95.1799 80.0195   3
  -1   2  17 98.7882 68.4501   1
   1  -2 -16 24.5314 64.2785   4
  -1   2  16-3.08859 67.6108   2
   1  -2 -16-4.57497 71.3401   3
  -1   2  16 62.0303 69.2066   1
   1  -2 -15 250.953 80.1067   4
   1  -2 -15 172.068 89.0254   3
  -1   2  15 399.537 107.428   2
  -1   2  15 242.409 82.8848   1
   1  -2 -14 30.8186 53.0839   4
  -1   2  14-42.3605 78.9684   2
  -1   2  14 47.2464 57.3350   1
   1  -2 -14-38.0318 81.2231   3
   1  -2 -13 82.6887 61.4468   4
   1  -2 -13 3.49061 67.1525   3
  -1   2  13-52.5864 70.5205   2
  -1   2  13 59.7650 52.9722   1
   1  -2 -12-10.8453 67.3267   3
  -1   2  12-153.655 82.7186   2
   1  -2 -12 6.96943 49.1207   4
  -1   2  12-4.55989 48.5467   1
   1  -2 -11 791.541 99.0096   1
  -1   2  11 800.424 100.016   1
   1  -2 -11 763.600 104.192   4
   1  -2 -11 830.966 122.893   3
  -1   2  11 714.324 113.553   2
  -1   2  10 1018.46 133.196   2
   1  -2 -10 817.054 124.246   3
   1  -2 -10 1005.74 109.669   4
  -1   2  10 887.483 112.775   4
   1  -2 -10 971.711 101.892   1
  -1   2  10 1119.25 112.646   1
  -1   2   9 1949.40 131.463   1
  -1   2   9 1775.08 147.097   4
   1  -2  -9 1890.88 128.449   1
  -1   2   9 1882.65 173.077   2
   1  -2  -9 1896.02 167.580   3
   1  -2  -9 1821.58 142.875   4
   1  -2  -8 4496.89 182.225   1
  -1   2   8 4140.93 242.032   2
  -1   2   8 4877.82 187.163   1
  -1   2   8 4678.14 223.949   4
   1  -2  -8 4840.23 248.348   3
   1  -2  -8 4700.14 222.458   4
   1  -2  -8 4730.92 240.855   3
   1  -2  -7 19.6716 52.0435   3
   1  -2  -7 96.4221 57.6395   4
  -1   2   7 92.4825 41.2691   1
   1  -2  -7-21.4724 52.1110   2
   1  -2  -7-19.8755 30.6748   1
  -1   2   7-11.3910 40.6147   4
  -1   2   7 114.793 79.9647   2
   1  -2  -7-66.8898 46.3011   3
   1  -2  -6 6356.93 174.785   1
  -1   2   6 6447.70 248.447   4
   1  -2  -6 6272.55 251.988   3
  -1   2   6 6466.93 272.214   2
   1  -2  -6 6071.05 263.047   2
   1  -2  -6 6277.06 242.254   4
   1  -2  -6 5757.15 253.099   3
  -1   2   6 6126.40 169.872   1
  -1   2   5 2716.35 173.747   2
  -1   2   5 2821.42 107.483   1
   1  -2  -5 2989.01 180.067   2
   1  -2  -5 2810.94 166.910   3
   1  -2  -5 2431.76 159.491   3
  -1   2   5 2663.91 160.116   4
   1  -2  -5 2504.97 152.547   4
  -1   2   5 2792.33 104.819   1
  -1   2   4 1476.43 128.792   2
  -1   2   4 1586.84 72.8528   1
   1  -2  -4 1268.94 113.916   2
  -1   2   4 1601.63 124.615   3
  -1   2   4 1436.49 70.1926   1
   1  -2  -4 1635.94 127.491   3
   1  -2  -4 1304.37 113.841   4
  -1   2   4 1407.23 117.290   4
  -1   2   3 2426.17 148.918   2
  -1   2   3 2721.97 155.459   4
   1  -2  -3 2808.42 157.625   4
  -1   2   3 2591.13 85.6824   1
   1  -2  -3 2598.18 154.773   3
  -1   2   3 2801.43 156.506   3
   1  -2  -3 2758.78 156.562   2
  -1   2   2 57720.1 685.497   3
   1  -2  -2 58359.5 396.785   1
  -1   2   2 59432.7 670.411   2
   1  -2  -2 58860.6 687.780   3
  -1   2   2 58627.1 691.322   4
  -1   2   2 58086.9 389.634   1
   1  -2  -2 59488.1 695.900   4
   1  -2  -2 59006.3 658.808   2
  -1   2   1 9321.27 258.000   2
   1  -2  -1 9383.06 277.715   4
   1  -2  -1 9091.13 273.424   3
  -1   2   1 8995.58 272.446   3
   1  -2  -1 9347.87 255.950   2
   1  -2  -1 9222.65 170.741   1
  -1   2   1 9040.54 276.736   4
  -1   2   1 9372.08 171.951   1
  -1   2   0 6572.01 209.704   2
  -1   2   0 7262.52 167.491   1
   1  -2   0 6836.48 238.720   3
   1  -2   0 7382.94 220.706   2
  -1   2   0 6410.38 234.712   3
   1  -2   0 6865.80 165.232   1
   1  -2   0 6509.45 231.717   4
  -1   2  -1 492745. 2024.74   4
   1  -2   1 494648. 1548.02   1
  -1   2  -1 487576. 1526.94   1
   1  -2   1 479638. 2002.82   4
  -1   2  -1 491641. 2053.04   3
   1  -2   1 481593. 1690.07   2
  -1   2  -1 483102. 1714.59   2
   1  -2   2 1140.58 89.6716   2
  -1   2  -2 974.737 99.9814   4
   1  -2   2 1016.68 100.769   4
   1  -2   2 1067.70 111.437   3
  -1   2  -2 1096.83 86.0898   2
  -1   2  -2 1123.01 114.824   3
   1  -2   2 1243.22 94.4480   1
  -1   2  -2 1094.21 86.0275   1
  -1   2  -3 1958.35 110.358   2
  -1   2  -3 2256.99 154.465   3
   1  -2   3 1895.09 120.484   1
   1  -2   3 2062.19 145.010   4
   1  -2   3 1926.63 106.869   2
   1  -2   3 2017.37 145.261   3
  -1   2  -3 2018.14 120.488   1
  -1   2  -3 2068.16 147.715   4
   1  -2   4 21110.3 414.690   1
   1  -2   4 20552.5 460.461   3
   1  -2   4 20972.6 348.397   2
  -1   2  -4 22107.3 475.027   3
   1  -2   4 20321.5 441.276   4
  -1   2  -4 21642.1 413.360   1
   1  -2   4 21143.1 453.374   4
  -1   2  -4 21198.7 350.256   2
   1  -2   5 872.359 103.496   3
   1  -2   5 935.761 78.7932   2
  -1   2  -5 1131.83 124.046   3
   1  -2   5 834.816 98.5994   4
  -1   2  -5 895.229 98.8301   1
   1  -2   5 972.652 104.615   1
  -1   2  -5 919.137 82.1239   2
   1  -2   5 982.420 106.205   4
  -1   2  -6 2300.70 169.229   3
   1  -2   6 2007.01 152.424   4
   1  -2   6 2092.21 160.154   4
   1  -2   6 1970.95 148.724   1
  -1   2  -6 1915.84 117.987   2
   1  -2   6 2101.19 163.859   3
  -1   2  -6 2147.99 122.154   2
  -1   2  -6 2351.43 161.288   1
  -1   2  -7 10443.6 269.960   2
   1  -2   7 9842.16 340.315   1
  -1   2  -7 10192.8 270.675   2
   1  -2   7 9832.30 336.099   4
   1  -2   7 9709.45 341.470   4
   1  -2   8 3747.02 225.835   1
   1  -2   8 3738.80 216.835   4
   1  -2   8 3687.78 213.482   4
  -1   2  -8 3904.61 241.961   3
  -1   2  -8 3891.20 172.724   2
  -1   2  -8 3865.30 178.776   2
   1  -2   9 98.2198 69.1792   1
  -1   2  -9 27.6811 41.7003   2
  -1   2  -9 13.3112 38.0473   2
   1  -2   9-12.2659 59.9040   4
  -1   2  -9 91.8182 66.7750   3
   1  -2  10 10015.4 377.757   4
  -1   2 -10 10600.7 309.006   2
   1  -2  10 10355.3 403.741   1
  -1   2 -10 10028.5 415.477   3
  -1   2 -10 9955.19 312.717   2
  -1   2 -11 1902.36 196.417   3
  -1   2 -11 1808.64 137.123   2
   1  -2  11 1716.05 179.733   1
  -1   2 -11 1642.89 138.570   2
  -1   2 -12 1096.24 160.484   3
   1  -2  12 883.153 144.521   1
  -1   2 -12 1091.56 115.491   2
  -1   2 -12 1242.40 124.901   2
  -1   2 -13 3955.16 225.177   2
  -1   2 -13 3872.23 283.966   3
  -1   2 -13 3433.12 202.481   2
   1  -2  13 3845.19 275.948   1
  -1   2 -14 103.645 60.0571   2
   1  -2  14 63.0416 73.7375   1
  -1   2 -14 117.394 69.7885   3
  -1   2 -14-11.8498 61.9088   4
  -1   2 -15 571.844 117.671   4
   1  -2  15 465.146 127.205   1
  -1   2 -15 538.525 124.895   3
  -1   2 -15 658.648 112.694   2
  -1   2 -16 2046.58 203.593   4
  -1   2 -16 2328.18 257.009   3
  -1   2 -16 2096.62 189.148   2
   1  -2  16 2256.01 243.425   1
  -1   2 -17 16104.5 561.785   4
   1  -2  17 14099.1 606.727   1
  -1   2 -17 15139.0 636.503   3
  -1   2 -17 14338.4 493.503   2
   1  -2  18 487.502 145.485   1
  -1   2 -18 481.749 116.959   2
  -1   2 -18 619.606 150.478   3
   1  -2  19 805.409 175.862   1
  -1   2 -19 607.424 129.733   2
  -1   2 -19 1011.05 193.411   3
  -1   2 -20 3493.34 341.319   3
   1  -2  20 3154.81 329.027   1
  -1   2 -20 3197.91 261.936   2
   1  -2  21 167.269 99.3000   4
  -1   2 -21 68.6678 89.7004   2
   1  -2  21 217.435 130.584   1
  -1   2 -21 195.279 120.060   3
   1  -2  22 42.7713 88.7255   4
   1  -2  22-148.823 110.112   1
  -1   2 -22 204.978 131.911   3
  -1   2 -22-113.053 94.2794   2
  -1   2 -23 477.595 187.846   3
   1  -2  23 784.932 171.957   4
   1  -2  24 83.6228 113.459   4
   1  -2  24 176.275 152.016   1
  -1   2 -24 77.1504 120.307   3
  -1   2 -25-197.884 159.109   3
   1  -2  25 238.058 155.779   1
  -1   2 -26 130.971 139.346   3
   1  -2  26 53.8616 126.330   1
  -1   1  29 667.465 199.174   2
  -1   1  29 547.753 201.900   1
  -1   1  28 15.2921 130.905   2
  -1   1  28 52.1594 132.941   1
  -1   1  27 272.131 146.138   1
   1  -1 -27 422.750 202.515   3
  -1   1  27-121.957 123.042   2
  -1   1  26 214.932 129.240   1
   1  -1 -26-23.1632 126.821   3
  -1   1  26-51.6323 107.216   2
  -1   1  25 322.941 129.798   1
  -1   1  25 268.216 123.242   2
   1  -1 -25 279.569 165.202   3
  -1   1  24 99.9074 97.8333   1
   1  -1 -24 154.518 127.020   3
  -1   1  24 81.6543 111.737   2
   1  -1 -23 127.413 110.291   3
  -1   1  23 36.6010 91.2625   2
  -1   1  23-48.5923 107.847   1
   1  -1 -23 20.7384 85.3077   4
   1  -1 -22 487.044 116.841   4
   1  -1 -22 575.632 161.562   3
  -1   1  22 871.501 176.619   2
  -1   1  22 550.375 138.477   1
   1  -1 -21-15.8530 95.1565   3
  -1   1  21-22.6839 85.5133   1
  -1   1  21-60.4939 86.8535   2
   1  -1 -21 64.4226 64.4115   4
  -1   1  20 129.873 106.799   2
   1  -1 -20 151.570 95.6216   3
   1  -1 -20 4.75456 61.5623   4
  -1   1  20 77.1197 82.1343   1
   1  -1 -19 1428.48 210.641   3
  -1   1  19 1964.30 233.957   2
   1  -1 -19 1879.15 184.774   4
  -1   1  19 2085.34 228.816   1
   1  -1 -18 304.436 106.389   3
  -1   1  18 229.654 97.6377   2
   1  -1 -18 413.374 101.428   4
  -1   1  18 433.099 114.338   1
  -1   1  17 37.7165 84.1950   2
   1  -1 -17 18.3550 60.7194   4
   1  -1 -17 67.5381 99.0512   3
  -1   1  17 65.4444 63.3504   1
  -1   1  16 5342.23 316.467   1
   1  -1 -16 5785.09 284.792   4
   1  -1 -16 5105.26 343.066   3
  -1   1  16 5850.39 349.308   2
  -1   1  15 379.182 108.312   2
  -1   1  15 487.791 108.236   1
   1  -1 -15 550.162 121.969   3
   1  -1 -15 427.379 87.6861   4
   1  -1 -14 42.9386 78.5786   3
  -1   1  14 64.5688 67.5418   1
   1  -1 -14-24.9637 49.1223   4
  -1   1  14 50.2576 67.7844   2
   1  -1 -13 253.705 63.8315   4
  -1   1  13 202.487 70.3234   1
   1  -1 -13 170.448 79.5060   3
  -1   1  13 128.159 55.6824   4
  -1   1  13 156.923 77.8181   2
  -1   1  12 7463.36 307.953   1
   1  -1 -12 8078.33 292.640   4
  -1   1  12 8066.33 358.049   2
  -1   1  12 7866.01 293.890   4
  -1   1  11 788.474 103.893   1
   1  -1 -11 1034.31 138.012   3
   1  -1 -11 809.224 104.005   1
  -1   1  11 780.343 119.147   2
   1  -1 -11 772.822 92.1445   4
  -1   1  11 643.984 91.8303   4
   1  -1 -10 8530.53 296.151   1
   1  -1 -10 8591.74 275.961   4
  -1   1  10 8715.82 279.402   4
   1  -1 -10 8052.83 338.344   3
  -1   1  10 8702.04 342.614   2
  -1   1  10 7896.58 283.401   1
  -1   1   9 5168.93 207.183   4
   1  -1  -9 5439.60 211.156   4
   1  -1  -9 4946.63 254.107   3
  -1   1   9 5334.06 260.727   2
   1  -1  -9 5144.94 215.155   1
  -1   1   9 5009.91 211.407   1
  -1   1   8 8934.47 318.270   2
   1  -1  -8 9562.17 265.733   4
   1  -1  -8 8599.98 315.752   2
  -1   1   8 8598.25 256.718   1
  -1   1   8 9004.41 326.123   3
   1  -1  -8 8797.80 259.080   1
   1  -1  -8 8862.22 321.490   3
  -1   1   8 8677.98 255.920   4
   1  -1  -7 8754.38 300.701   2
  -1   1   7 8523.59 300.197   2
   1  -1  -7 8460.30 302.908   3
   1  -1  -7 8780.12 241.932   4
   1  -1  -7 8986.16 239.907   1
  -1   1   7 8601.89 244.256   4
  -1   1   7 8822.68 236.096   1
  -1   1   7 9097.53 315.529   3
  -1   1   6 75.0508 38.3110   4
   1  -1  -6 81.2958 52.1417   2
  -1   1   6 192.258 58.3372   2
   1  -1  -6 119.951 49.7436   3
  -1   1   6 91.3629 35.2955   1
  -1   1   6 89.6657 55.5790   3
   1  -1  -6 160.545 47.4860   4
   1  -1  -6 67.8631 30.6471   1
  -1   1   5 10657.0 307.431   3
  -1   1   5 11406.4 306.392   2
   1  -1  -5 10533.6 202.496   1
   1  -1  -5 10579.8 297.717   3
   1  -1  -5 10927.0 298.577   2
  -1   1   5 11253.5 254.924   4
   1  -1  -5 11090.0 249.849   4
  -1   1   5 10646.5 200.919   1
   1  -1  -4 8378.14 246.548   2
   1  -1  -4 7880.98 248.368   3
  -1   1   4 7732.91 143.459   1
   1  -1  -4 7903.86 242.452   3
  -1   1   4 7784.96 243.319   2
  -1   1   4 7551.47 204.694   4
   1  -1  -4 7633.91 204.447   4
   1  -1  -4 7573.16 142.173   1
   1  -1  -3 5915.77 193.177   2
   1  -1  -3 5448.00 190.284   3
  -1   1   3 5500.95 192.451   2
  -1   1   3 5172.06 193.880   3
  -1   1   3 5536.80 172.791   4
   1  -1  -3 5526.94 169.893   4
   1  -1  -2-14.9654 35.7391   2
   1  -1  -2 28.6793 39.9889   3
  -1   1   2 52.0643 39.7965   2
  -1   1   2 76.5928 47.8001   3
   1  -1  -2 37.0927 38.6695   4
  -1   1   2 45.6049 36.8615   4
  -1   1   1 18772.0 296.022   2
   1  -1  -1 19384.1 319.532   4
  -1   1   1 20139.8 344.991   3
   1  -1  -1 18078.8 323.813   3
   1  -1  -1 20150.6 302.917   2
  -1   1   1 19421.9 317.779   4
  -1   1   0 250632. 1181.81   4
  -1   1   0 252747. 1185.13   3
   1  -1   0 259477. 1197.32   4
  -1   1   0 247619. 716.861   1
  -1   1   0 256650. 974.577   2
   1  -1   0 269176. 1224.96   3
   1  -1   0 269624. 698.712   1
   1  -1   0 246807. 964.623   2
   1  -1   1 151801. 927.293   3
   1  -1   1 151671. 665.240   2
  -1   1  -1 149390. 951.904   3
   1  -1   1 151191. 954.253   4
  -1   1  -1 150159. 671.117   2
  -1   1  -1 150695. 931.091   4
   1  -1   1 152456. 671.475   1
  -1   1  -1 150451. 692.781   1
  -1   1  -2 9658.71 157.251   2
  -1   1  -2 10249.4 213.007   1
  -1   1  -2 9993.70 252.139   3
   1  -1   2 9848.76 250.742   3
   1  -1   2 9984.22 156.123   2
   1  -1   2 10292.3 208.602   1
   1  -1   2 10924.3 266.963   4
   1  -1   2 11032.9 262.175   4
   1  -1   3 19.6629 19.7227   2
  -1   1  -3-4.65968 39.0345   1
   1  -1   3-44.6751 49.6844   4
   1  -1   3 2.95862 40.4474   3
  -1   1  -3 32.4474 23.5457   2
   1  -1   3-1.60703 41.3417   4
  -1   1  -3 10.7090 42.1730   3
   1  -1   3 50.2468 43.0240   1
   1  -1   4 3344.32 163.383   4
  -1   1  -4 3504.23 169.732   4
  -1   1  -4 3679.98 171.051   3
   1  -1   4 3597.20 173.197   3
  -1   1  -4 3338.11 154.482   1
   1  -1   4 3597.58 155.713   1
  -1   1  -4 3227.76 91.9330   2
  -1   1  -4 3169.33 92.9812   2
   1  -1   5 6212.62 240.738   3
  -1   1  -5 6589.97 142.261   2
   1  -1   5 6697.38 231.369   1
  -1   1  -5 6683.84 238.795   4
  -1   1  -5 6822.27 236.267   1
   1  -1   5 6609.57 235.692   4
  -1   1  -5 7139.51 250.804   3
  -1   1  -5 6786.31 147.598   2
   1  -1   6 11750.7 334.305   3
  -1   1  -6 10932.0 317.378   4
  -1   1  -6 10793.3 208.275   2
  -1   1  -6 11292.9 322.531   1
  -1   1  -6 11443.0 335.087   3
   1  -1   6 11049.8 316.182   4
   1  -1   6 11171.3 314.173   1
  -1   1  -6 11025.1 203.723   2
   1  -1   7 3472.62 186.469   4
  -1   1  -7 3643.81 201.849   3
  -1   1  -7 3588.28 131.504   2
   1  -1   7 3849.10 196.862   1
  -1   1  -7 3656.87 200.368   1
  -1   1  -7 3609.46 194.726   4
   1  -1   7 3574.81 198.263   3
   1  -1   8-54.5719 56.4962   3
  -1   1  -8 66.2553 62.7539   3
  -1   1  -8 95.0498 38.6157   2
  -1   1  -8-14.1471 55.6677   1
   1  -1   8-2.08395 37.1523   2
   1  -1   8 168.445 65.1473   1
   1  -1   8 4.46730 42.0328   4
  -1   1  -8 27.7425 63.8342   4
  -1   1  -9 942.092 84.3318   2
  -1   1  -9 938.337 114.960   4
   1  -1   9 877.909 109.750   4
   1  -1   9 832.968 111.379   1
  -1   1  -9 779.539 112.073   3
   1  -1   9 953.086 86.1958   2
  -1   1 -10 15302.5 434.073   4
  -1   1 -10 14812.3 327.941   2
  -1   1 -10 14744.9 457.426   3
   1  -1  10 15053.8 337.910   2
   1  -1  10 14695.6 455.341   1
  -1   1 -11 1578.69 163.423   3
   1  -1  11 1696.55 124.032   2
  -1   1 -11 1673.91 123.140   2
  -1   1 -11 1569.42 153.191   4
   1  -1  11 1494.64 161.097   1
  -1   1 -12 132.025 54.5641   4
   1  -1  12 163.509 50.3359   2
   1  -1  12 108.338 67.0555   1
  -1   1 -12 124.682 48.6284   2
   1  -1  13 6396.57 261.334   2
  -1   1 -13 6082.98 333.536   3
  -1   1 -13 5973.14 306.780   4
  -1   1 -13 6012.05 253.216   2
  -1   1 -14 15.1932 61.2117   4
   1  -1  14 52.8225 51.9185   2
  -1   1 -14 98.3645 52.2766   2
   1  -1  14 34.1300 78.0970   1
  -1   1 -14-16.8690 84.7754   3
  -1   1 -15 78.9557 81.0784   3
   1  -1  15 154.869 83.2394   1
  -1   1 -15 18.8443 59.5251   4
   1  -1  15 169.693 64.9875   2
   1  -1  16 161.801 85.7066   1
  -1   1 -16 281.696 112.148   3
  -1   1 -16 345.733 97.7460   4
   1  -1  16 185.557 77.5267   2
  -1   1 -17 1408.41 201.764   3
   1  -1  17 1664.18 222.358   1
  -1   1 -17 1618.17 181.606   4
   1  -1  17 1584.95 163.402   2
  -1   1 -18-68.6011 86.0653   4
  -1   1 -18 155.523 108.367   3
   1  -1  18 121.162 101.808   1
   1  -1  18 20.2177 69.0696   2
  -1   1 -19 520.786 137.476   3
  -1   1 -19 660.050 143.837   4
   1  -1  19 803.753 131.374   2
   1  -1  19 351.905 132.037   1
   1  -1  20 2620.34 289.477   1
  -1   1 -20 2213.09 262.668   3
  -1   1 -20 2882.77 266.486   4
   1  -1  20 3025.91 243.997   2
  -1   1 -21 176.015 92.4236   4
   1  -1  21 291.618 115.671   1
   1  -1  21 244.808 111.928   2
  -1   1 -21 427.309 146.792   3
  -1   1 -22 174.790 115.439   3
  -1   1 -22-109.458 100.137   4
   1  -1  22 153.286 123.632   1
   1  -1  22 112.743 72.8766   2
   1  -1  23 369.504 151.020   1
  -1   1 -23 218.891 106.900   4
   1  -1  23 434.277 134.890   2
  -1   1 -23 152.591 100.219   3
  -1   1 -24 219.728 121.990   4
  -1   1 -24 54.9240 118.028   3
   1  -1  24 30.3311 111.008   1
   1  -1  25 36.3875 132.200   1
  -1   1 -25 174.205 135.419   3
  -1   1 -25 230.773 136.672   4
   1  -1  26 133.653 114.736   1
  -1   1 -26 292.234 151.898   3
  -1   1 -27 430.871 179.307   3
   1  -1  27 451.512 188.008   1
  -1   0  29 1534.34 277.764   2
  -1   0  28 2197.26 344.180   1
  -1   0  28 1737.90 272.300   2
  -1   0  27 669.226 188.351   1
   1   0 -27 886.115 235.592   3
  -1   0  27 904.936 219.043   2
   1   0 -26 640.676 200.851   3
  -1   0  26 813.792 215.968   1
  -1   0  26 609.845 166.981   2
   1   0 -25 261.450 170.288   3
  -1   0  25 108.546 103.316   2
  -1   0  25 197.765 128.681   1
   1   0 -24 20.4897 101.228   3
  -1   0  24 11.6916 96.4310   1
  -1   0  24 81.2646 113.358   2
  -1   0  23 186.302 114.953   2
  -1   0  23 2.75421 90.5703   1
   1   0 -23 104.452 108.818   3
  -1   0  22 659.250 152.431   1
  -1   0  22 417.619 132.543   2
   1   0 -22 584.031 158.319   3
  -1   0  21-19.5344 87.8530   2
   1   0 -21 37.3036 60.0357   4
   1   0 -21-93.4345 95.6697   3
  -1   0  21-60.3437 94.1041   1
   1   0 -20 4.59729 58.8809   4
  -1   0  20 9.35489 93.3550   2
   1   0 -20 90.6251 99.2136   3
  -1   0  20 39.1664 78.7803   1
  -1   0  19 14305.8 583.530   2
  -1   0  19 13093.2 570.586   1
   1   0 -19 12525.9 598.388   3
   1   0 -19 13707.1 448.723   4
   1   0 -18 6.18234 55.1392   4
  -1   0  18 77.8559 80.3476   1
   1   0 -18 175.155 121.449   3
  -1   0  18-60.6178 86.1836   2
   1   0 -17-6.63921 47.5840   4
  -1   0  17 112.279 87.6871   2
   1   0 -17 91.2148 94.2687   3
  -1   0  17 131.818 91.3017   1
   1   0 -16 26978.9 779.351   3
   1   0 -16 26666.7 555.748   4
  -1   0  15 54.9255 47.3824   4
  -1   0  15 193.061 90.8344   1
   1   0 -15 156.919 56.7374   4
   1   0 -15 202.531 78.6783   3
  -1   0  15 87.4866 72.9575   2
   1   0 -14-42.3757 72.0882   3
  -1   0  14-50.6478 67.4525   2
   1   0 -14 39.9330 41.3728   4
  -1   0  14 0.35359 66.4281   1
  -1   0  14 67.4870 44.4312   4
  -1   0  13 158.159 71.3626   1
   1   0 -13 77.6923 84.7565   3
   1   0 -13 33.8917 40.8228   4
  -1   0  13-21.5053 39.2527   4
  -1   0  13 31.7606 74.7917   2
  -1   0  12 3056.95 213.234   1
  -1   0  12 3062.39 223.096   2
   1   0 -12 3378.20 167.852   4
   1   0 -12 3355.29 242.423   3
  -1   0  12 3307.91 171.606   4
  -1   0  11 1814.91 161.222   1
  -1   0  11 2091.36 179.716   2
  -1   0  11 1784.96 122.467   4
   1   0 -11 1872.52 178.507   3
   1   0 -11 1907.63 122.040   4
  -1   0  10 1598.79 155.395   2
  -1   0  10 1787.52 150.502   1
   1   0 -10 1181.96 135.185   3
   1   0 -10 1316.12 129.503   1
   1   0 -10 1635.48 108.665   4
  -1   0  10 1717.58 111.400   4
  -1   0   9 6943.61 271.137   1
  -1   0   9 6946.73 294.746   2
   1   0  -9 6599.01 296.165   3
   1   0  -9 7102.11 206.176   4
  -1   0   9 7143.67 206.776   4
   1   0  -9 6978.45 265.174   1
   1   0  -8 172.665 76.7882   3
  -1   0   8 143.447 38.3885   4
  -1   0   8 108.047 58.2734   3
   1   0  -8 173.348 61.4962   2
  -1   0   8 188.197 75.6052   2
   1   0  -8 201.290 60.4954   1
  -1   0   8 176.980 59.5150   1
   1   0  -8 229.793 44.5908   4
   1   0  -7 2352.72 140.278   1
   1   0  -7 2518.51 166.282   3
   1   0  -7 2229.25 99.6528   4
   1   0  -7 2393.89 154.962   2
  -1   0   7 2531.71 163.960   2
  -1   0   7 2578.23 145.362   1
  -1   0   7 2297.22 103.499   4
  -1   0   7 2347.94 160.234   3
   1   0  -6 730.435 52.9896   4
   1   0  -6 673.953 87.4005   2
   1   0  -6 934.651 101.688   3
  -1   0   6 757.155 78.9756   1
   1   0  -6 680.861 72.0138   1
  -1   0   6 721.428 90.5204   2
  -1   0   6 715.303 56.3021   4
  -1   0   6 768.387 96.7781   3
  -1   0   5 210.464 49.6461   1
   1   0  -5 168.145 28.9939   4
   1   0  -5 110.112 47.3181   3
  -1   0   5 196.502 30.9804   4
  -1   0   5 164.978 50.2359   3
   1   0  -5 150.304 45.1392   1
  -1   0   5 261.998 69.5174   2
   1   0  -5 209.979 53.9939   2
  -1   0   4 137.815 38.1311   1
   1   0  -4 92.5311 50.6163   3
  -1   0   4 61.3200 43.5469   3
   1   0  -4 70.7775 23.5407   4
   1   0  -4 103.776 39.3518   1
  -1   0   4 78.8536 47.5829   2
   1   0  -4 103.221 52.5596   2
  -1   0   4 81.8486 24.1421   4
   1   0  -3 1623.78 79.6267   1
  -1   0   3 1706.83 107.635   2
  -1   0   3 1738.71 64.3569   4
  -1   0   3 1678.89 81.4452   1
   1   0  -3 1587.45 104.382   3
   1   0  -3 1708.35 105.763   2
   1   0  -3 1672.23 60.1489   4
  -1   0   3 1382.40 98.5547   3
  -1   0   2 104.036 42.9203   2
  -1   0   2 59.9051 38.5155   3
  -1   0   2 12.3993 23.9826   1
   1   0  -2 28.5883 21.0969   4
   1   0  -2 60.5966 39.2766   2
   1   0  -2 1.17050 22.0051   1
  -1   0   2 30.7228 23.4952   4
   1   0  -2 68.0045 45.5919   3
   1   0  -1 93.6108 27.2250   4
  -1   0   1-25.9659 24.8257   1
   1   0  -1-13.1694 19.6219   4
   1   0  -1 15.7496 28.3677   3
   1   0  -1 19.7201 29.8688   2
  -1   0   1 1.06093 30.1578   2
   1   0  -1 14.8568 20.5031   1
  -1   0   1-40.2770 32.1423   3
   1   0   0-0.51082 23.2281   4
  -1   0   0 71.0970 29.2171   4
   1   0   0 17.8582 20.8988   2
  -1   0   0 9.81752 26.0672   3
   1   0   0-13.0844 19.8508   1
  -1   0   0-13.2646 23.7760   2
   1   0   0 25.1834 29.0019   3
  -1   0   0-7.79496 22.4560   1
   1   0   1-20.6105 23.6648   1
   1   0   1 10.0982 27.0447   4
  -1   0  -1 18.3488 26.3329   1
   1   0   1-5.15171 18.3435   2
  -1   0  -1-1.90376 30.8608   4
   1   0   1 21.7478 28.5158   3
  -1   0  -1 1.02166 25.6557   3
  -1   0  -1 46.9280 22.9724   2
  -1   0  -2 151.047 43.9956   4
   1   0   2 214.656 39.5258   3
  -1   0  -2 239.144 41.7029   3
   1   0   2 278.019 46.9697   4
  -1   0  -2 264.441 48.0894   1
   1   0   2 236.120 47.5569   1
  -1   0  -3 1697.69 101.572   1
   1   0   3 1541.80 88.2932   3
  -1   0  -3 1463.61 99.8510   4
   1   0   3 1517.35 98.5438   4
   1   0   3 1541.80 100.796   1
  -1   0  -3 1819.47 92.7680   3
   1   0   4 247.926 53.9867   4
   1   0   4 291.331 60.5138   1
   1   0   4 146.022 48.3628   3
  -1   0  -4 275.940 48.9880   3
  -1   0  -4 182.526 46.0754   1
  -1   0  -4 200.531 62.1091   4
  -1   0  -5 330.656 68.2180   4
   1   0   5 501.785 74.1302   4
   1   0   5 324.702 66.3776   1
   1   0   5 482.549 36.7360   2
  -1   0  -5 379.950 34.1943   2
  -1   0  -5 432.934 66.4068   1
  -1   0  -5 350.636 63.1820   3
   1   0   5 350.734 54.0542   3
  -1   0  -6 650.662 89.6213   4
  -1   0  -6 684.844 76.7448   3
   1   0   6 775.195 55.5314   2
   1   0   6 894.075 103.496   1
   1   0   6 672.119 80.7176   3
   1   0   6 759.105 95.4100   4
  -1   0  -6 752.030 89.8276   1
  -1   0  -6 706.049 53.4522   2
  -1   0  -7 2679.15 157.564   3
   1   0   7 2491.14 146.837   3
   1   0   7 2515.16 155.838   4
   1   0   7 2711.03 108.133   2
  -1   0  -7 2321.78 152.839   4
   1   0   7 2420.09 165.824   1
  -1   0  -7 2383.48 159.182   1
  -1   0  -7 2664.00 109.508   2
   1   0   8 33.2504 48.9782   3
  -1   0  -8-53.8337 53.9347   1
   1   0   8 34.8412 43.5162   4
  -1   0  -8 88.3039 41.1076   2
  -1   0  -8 90.1610 53.2421   3
   1   0   8-11.0009 66.1851   1
   1   0   8 102.474 37.4567   2
  -1   0  -8 119.289 61.9316   4
  -1   0  -9 11881.5 364.979   4
   1   0   9 11339.7 375.725   1
   1   0   9 11328.1 364.183   4
   1   0   9 11827.6 356.593   3
  -1   0  -9 11846.8 276.786   2
  -1   0  -9 12878.2 384.664   3
   1   0   9 11953.6 274.177   2
   1   0  10 66.6546 55.5976   1
  -1   0 -10 187.934 63.2217   4
  -1   0 -10 86.2218 51.2891   3
   1   0  10 142.543 45.3011   2
  -1   0 -10 107.865 45.5615   2
  -1   0 -11 1107.64 100.883   2
   1   0  11 1269.83 109.490   2
  -1   0 -11 1176.88 133.872   4
   1   0  11 1142.28 138.224   1
  -1   0 -11 1139.97 131.677   3
  -1   0 -12 4547.66 269.263   3
  -1   0 -12 4766.42 215.261   2
  -1   0 -12 4297.94 247.361   4
   1   0  12 3967.95 257.015   1
   1   0  12 4540.86 206.484   2
  -1   0 -13 1080.49 112.967   2
   1   0  13 1067.58 110.906   2
   1   0  13 1099.58 149.870   1
  -1   0 -13 1230.31 147.640   4
  -1   0 -13 953.127 137.708   3
  -1   0 -14 39.0283 57.2989   3
   1   0  14 159.010 64.3755   2
  -1   0 -14 63.3466 57.8560   4
   1   0  14-25.5598 65.6565   1
  -1   0 -14 65.5122 47.0856   2
  -1   0 -15 376.232 109.854   3
   1   0  15 263.651 68.6558   2
  -1   0 -15 217.483 77.0411   4
   1   0  15 279.604 87.5703   1
  -1   0 -16 19586.0 644.910   3
   1   0  16 19531.4 651.563   1
   1   0  16 20333.2 522.306   2
  -1   0 -16 19661.0 598.660   4
  -1   0 -17 104.537 74.4676   4
  -1   0 -17 185.843 90.8765   3
   1   0  17 293.579 79.0369   2
   1   0  17 166.763 90.1484   1
  -1   0 -18 171.975 100.415   4
   1   0  18 96.6333 78.1002   2
   1   0  18 62.6907 81.0224   1
  -1   0 -18 4.89364 72.4378   3
   1   0  19 7463.19 362.332   2
  -1   0 -19 7044.65 437.453   3
  -1   0 -19 6746.95 386.816   4
   1   0  19 5962.94 403.545   1
   1   0  20-101.698 91.6377   1
  -1   0 -20 46.3794 74.1349   3
  -1   0 -20 5.76026 79.2309   4
   1   0  20-110.158 90.2111   2
  -1   0 -21 49.1733 97.7121   3
  -1   0 -21 109.945 88.3048   4
   1   0  21 113.368 81.3747   2
   1   0  21 166.207 126.366   1
  -1   0 -22-37.2406 78.3076   4
  -1   0 -22-17.4587 106.104   3
   1   0  22 14.2938 106.247   1
   1   0  22-5.47775 78.8916   2
  -1   0 -23-178.546 148.335   3
  -1   0 -23 30.2585 80.2455   4
   1   0  23 113.608 113.003   1
  -1   0 -24-49.4240 103.132   3
   1   0  24 16.1445 96.8484   1
   1   0  24-21.1766 94.2461   2
  -1   0 -24 31.8221 97.7835   4
   1   0  25 476.031 174.821   1
  -1   0 -25 89.7115 88.9514   4
  -1   0 -26-73.3196 112.549   4
   1   0  26-139.702 138.611   1
  -1   0 -26-27.4699 110.397   3
   1   0  27 31.2387 124.149   1
  -1   0 -27-15.2188 130.312   3
  -1   0 -28 1167.51 266.448   3
   1   0  28 974.537 237.269   1
  -1  -1  28-35.6567 148.946   2
  -1  -1  27 11.1117 123.673   1
  -1  -1  27 199.950 126.269   2
   1   1 -26 117.093 155.837   3
  -1  -1  26-80.1626 152.073   1
  -1  -1  26 56.6372 126.586   2
  -1  -1  25 199.069 128.393   1
   1   1 -25 207.096 143.619   3
  -1  -1  25 173.971 149.261   2
   1   1 -24 98.4625 155.292   3
  -1  -1  24-7.46986 102.692   1
  -1  -1  24-53.7894 117.411   2
   1   1 -23 644.481 187.080   3
  -1  -1  23 472.080 158.322   1
  -1  -1  23 830.643 185.726   2
  -1  -1  22 189.203 106.610   1
   1   1 -22 84.2031 104.170   3
  -1  -1  22 108.489 105.879   2
  -1  -1  21 264.929 138.043   1
   1   1 -21 208.972 114.398   3
  -1  -1  21 344.801 141.893   2
  -1  -1  20 2730.85 276.183   2
  -1  -1  20 2645.94 290.189   1
   1   1 -20 2738.36 207.645   4
   1   1 -20 2916.37 307.972   3
   1   1 -19 243.452 78.0231   4
   1   1 -19 370.533 126.141   3
  -1  -1  19 312.876 113.345   2
  -1  -1  19 239.024 108.908   1
   1   1 -18-2.26491 87.1347   3
   1   1 -18 51.5919 46.4636   4
  -1  -1  18 19.6591 76.7115   2
  -1  -1  18-30.1378 69.7722   1
  -1  -1  17 1780.92 214.415   1
  -1  -1  17 1885.94 215.433   2
   1   1 -17 1935.43 236.196   3
   1   1 -17 1939.40 153.509   4
   1   1 -16 289.401 73.2061   4
   1   1 -16 209.891 101.000   3
  -1  -1  16 57.2336 76.9753   1
  -1  -1  16 164.469 75.0664   2
   1   1 -15 141.838 91.6181   3
  -1  -1  15 150.618 87.4715   2
   1   1 -15 83.3647 44.4065   4
  -1  -1  15 81.5090 49.3613   4
  -1  -1  15 113.347 88.2323   1
   1   1 -14 211.923 56.9108   4
  -1  -1  14 227.391 59.9880   4
  -1  -1  14 184.775 76.2313   1
   1   1 -14 133.073 82.5114   3
  -1  -1  14 278.647 95.0346   2
   1   1 -13 10270.9 284.355   4
  -1  -1  13 10352.5 426.015   2
   1   1 -13 10512.7 447.445   3
  -1  -1  13 9785.70 286.160   4
  -1  -1  13 9613.09 416.102   1
  -1  -1  12 77.9282 75.3032   1
   1   1 -12 148.056 40.8775   4
   1   1 -12 65.3683 63.4052   3
  -1  -1  12 225.817 68.9501   2
  -1  -1  12 124.303 42.3900   4
  -1  -1  11 905.905 123.573   1
   1   1 -11 1029.53 145.086   3
  -1  -1  11 856.299 121.030   2
  -1  -1  11 1007.43 83.9708   4
   1   1 -11 823.935 75.0043   4
   1   1 -10 7627.01 336.150   3
  -1  -1  10 7663.17 203.585   4
  -1  -1  10 7063.51 315.880   1
   1   1 -10 7611.18 200.059   4
  -1  -1  10 7948.78 333.133   2
   1   1  -9 2004.38 96.2243   4
   1   1  -9 1955.36 173.728   3
  -1  -1   9 1776.58 154.026   1
  -1  -1   9 2033.84 174.288   2
  -1  -1   9 2114.33 99.3409   4
   1   1  -8 974.833 111.309   1
   1   1  -8 870.910 59.0419   4
   1   1  -8 992.400 124.608   3
  -1  -1   8 954.865 118.704   2
   1   1  -8 785.797 102.171   2
  -1  -1   8 715.387 98.9046   1
  -1  -1   8 813.389 105.198   3
  -1  -1   8 945.388 61.8158   4
   1   1  -7 4577.11 221.613   2
  -1  -1   7 3985.28 105.221   4
  -1  -1   7 4416.62 217.560   1
  -1  -1   7 4489.19 223.461   2
  -1  -1   7 4169.29 215.270   3
   1   1  -7 4359.81 219.443   3
   1   1  -7 4099.51 204.564   1
   1   1  -7 4022.53 105.278   4
   1   1  -6 8943.26 282.246   1
  -1  -1   6 8367.25 282.300   3
  -1  -1   6 8669.50 281.158   1
   1   1  -6 8289.67 285.318   2
  -1  -1   6 8862.88 297.237   2
   1   1  -6 8485.94 280.994   3
  -1  -1   5 7362.68 244.303   1
   1   1  -5 7077.67 241.676   3
   1   1  -5 7517.37 259.568   2
   1   1  -5 7345.31 246.486   1
  -1  -1   5 7030.67 254.780   2
  -1  -1   5 7444.79 249.801   3
   1   1  -4 7119.83 221.022   3
   1   1  -4 7399.98 240.491   2
  -1  -1   4 7441.91 249.392   2
  -1  -1   4 6232.77 214.318   3
  -1  -1   4 7345.57 232.324   1
   1   1  -4 7133.37 232.740   1
   1   1  -3 109.504 39.7186   3
  -1  -1   3 103.942 42.9723   1
  -1  -1   3 203.035 50.5305   3
   1   1  -3 217.898 53.3052   1
   1   1  -3 92.6136 40.3154   2
  -1  -1   3 206.863 60.3174   2
  -1  -1   2 5950.13 167.733   3
   1   1  -2 6720.55 171.398   3
   1   1  -2 7250.57 218.485   2
   1   1  -2 6932.97 203.127   1
  -1  -1   2 6620.73 202.206   1
  -1  -1   2 7126.88 218.960   2
  -1  -1   1 190989. 1016.30   1
   1   1  -1 204079. 1036.42   1
   1   1  -1 183073. 1011.04   2
   1   1  -1 201145. 781.330   3
   1   1  -1 193665. 1034.92   2
  -1  -1   1 185733. 698.146   4
  -1  -1   1 192651. 798.434   3
   1   1  -1 195972. 705.728   4
  -1  -1   0 206733. 1022.81   2
  -1  -1   0 205403. 1052.47   1
  -1  -1   0 207841. 857.601   4
   1   1   0 212459. 658.908   3
   1   1   0 214573. 1062.70   1
   1   1   0 210380. 846.432   4
   1   1   0 207950. 1017.48   2
  -1  -1  -1 28831.5 366.587   2
  -1  -1  -1 28815.7 398.912   1
   1   1   1 29711.1 366.953   2
   1   1   1 30750.0 410.071   1
   1   1   1 30493.4 357.672   4
  -1  -1  -1 29976.3 361.111   4
   1   1   2 1101.02 76.7725   2
  -1  -1  -2 1095.69 76.1003   2
   1   1   2 1113.73 90.3414   1
  -1  -1  -2 1142.07 87.5674   4
   1   1   2 1041.90 81.6725   4
  -1  -1  -2 1109.11 90.0872   1
  -1  -1  -3 3547.44 127.950   2
  -1  -1  -3 3649.38 89.7862   3
   1   1   3 3433.15 148.195   4
   1   1   3 3433.05 162.990   1
   1   1   3 3617.07 87.9489   3
   1   1   3 3513.56 127.104   2
   1   1   3 3850.64 162.219   1
  -1  -1  -3 3370.85 151.519   4
   1   1   4 8643.93 247.646   4
   1   1   4 8529.15 164.197   3
  -1  -1  -4 8623.68 166.512   3
  -1  -1  -4 8800.73 255.829   4
  -1  -1  -4 8629.25 200.071   2
  -1  -1  -4 8042.45 248.617   1
   1   1   4 8480.48 196.505   2
   1   1   5 16087.4 280.550   2
  -1  -1  -5 15016.1 349.177   4
  -1  -1  -5 17225.3 277.033   3
   1   1   5 16204.7 362.948   1
   1   1   5 16210.3 359.337   4
  -1  -1  -5 17378.8 292.536   2
   1   1   5 15986.7 261.037   3
  -1  -1  -5 17262.5 377.579   1
   1   1   6-30.7567 54.4838   4
  -1  -1  -6 8.82615 47.9482   1
   1   1   6-53.8374 38.9958   2
  -1  -1  -6 26.7664 47.0756   4
  -1  -1  -6-18.7685 32.1526   2
  -1  -1  -6-8.44447 32.8647   3
   1   1   6 64.8547 52.5667   1
   1   1   6 40.0811 33.7569   3
   1   1   7 1702.33 107.100   2
   1   1   7 2028.89 145.753   1
  -1  -1  -7 1863.34 146.020   1
  -1  -1  -7 2072.30 115.922   2
   1   1   7 2088.77 152.164   4
  -1  -1  -7 2100.82 127.192   3
  -1  -1  -7 1719.45 137.435   4
   1   1   7 2008.65 122.172   3
  -1  -1  -8 2470.91 169.290   4
   1   1   8 2379.05 131.772   2
  -1  -1  -8 2606.56 139.684   2
   1   1   8 2403.78 142.877   3
   1   1   8 2511.14 180.691   1
   1   1   8 2502.53 172.933   4
  -1  -1  -8 2560.44 150.140   3
  -1  -1  -8 2679.05 180.112   1
   1   1   9 32342.5 618.648   4
  -1  -1  -9 34193.7 632.981   4
  -1  -1  -9 33961.8 515.216   2
   1   1   9 32773.7 503.976   2
   1   1   9 33193.9 553.105   3
   1   1   9 33997.1 645.798   1
  -1  -1  -9 34118.6 564.054   3
   1   1  10 1675.81 138.233   3
   1   1  10 1687.91 124.675   2
  -1  -1 -10 1652.63 143.458   3
  -1  -1 -10 1372.79 139.396   4
  -1  -1 -10 1680.93 129.090   2
   1   1  10 1436.83 152.853   1
   1   1  11 485.465 107.679   1
  -1  -1 -11 553.723 103.678   4
   1   1  11 564.044 80.8186   2
  -1  -1 -11 556.131 82.7945   2
  -1  -1 -11 465.979 85.2553   3
   1   1  12 2700.31 170.500   2
   1   1  12 2691.48 215.086   1
  -1  -1 -12 2588.46 204.588   4
  -1  -1 -12 2973.12 208.899   3
  -1  -1 -12 2916.55 183.106   2
  -1  -1 -13 50.9858 56.2730   4
   1   1  13 155.594 87.1596   1
  -1  -1 -13 64.3873 65.8163   3
  -1  -1 -13 115.984 59.9025   2
   1   1  13 105.408 59.2500   2
   1   1  14 178.015 61.5684   2
  -1  -1 -14 64.8429 71.3181   3
   1   1  14 67.1319 72.4721   1
  -1  -1 -14 301.614 79.7861   4
  -1  -1 -15 12402.5 467.537   4
   1   1  15 12414.6 406.727   2
  -1  -1 -15 12339.8 471.180   3
   1   1  15 11756.8 486.060   1
   1   1  16-118.954 78.8280   1
  -1  -1 -16 15.7740 71.7155   3
  -1  -1 -16-36.7545 72.2711   4
   1   1  16 62.3084 71.0205   2
   1   1  17 709.665 116.702   2
  -1  -1 -17 764.674 137.188   4
   1   1  17 909.936 162.817   1
  -1  -1 -17 745.190 147.270   3
   1   1  18 9313.80 393.335   2
   1   1  18 9106.46 475.030   1
  -1  -1 -18 8530.99 447.053   3
  -1  -1 -18 8484.56 421.102   4
   1   1  19 8431.18 392.159   2
  -1  -1 -19 8732.68 468.606   3
  -1  -1 -19 8690.28 439.290   4
   1   1  19 8232.57 468.799   1
  -1  -1 -20 388.723 118.051   4
  -1  -1 -20 483.678 148.470   3
   1   1  20 516.560 139.884   1
   1   1  20 276.422 85.0323   2
  -1  -1 -21-72.6275 87.3760   4
   1   1  21 108.544 98.3458   1
  -1  -1 -21 34.3166 78.4682   3
   1   1  21 29.0002 74.7066   2
   1   1  22 34.7648 103.715   1
  -1  -1 -22 17.5140 90.5772   3
  -1  -1 -22-45.0022 78.2967   4
   1   1  22 73.8618 79.6386   2
  -1  -1 -23-24.7400 84.1856   4
   1   1  23-6.91193 85.5077   2
  -1  -1 -23-139.592 114.727   3
   1   1  23-2.75345 89.0875   1
   1   1  24-99.5477 100.164   1
  -1  -1 -24-102.106 99.6505   4
  -1  -1 -24 72.1090 111.318   3
   1   1  24-65.4936 75.8822   2
   1   1  25 193.788 98.8415   1
  -1  -1 -25 71.6175 103.536   4
  -1  -1 -25 68.1051 127.816   3
   1   1  26 68.8891 124.491   1
  -1  -1 -26-94.8137 117.495   3
  -1  -1 -27-107.320 123.945   4
   1   1  27 120.406 113.932   1
  -1  -1 -27 193.921 111.747   3
   1   1  28 4790.10 469.445   1
  -1  -1 -28 3891.49 427.828   3
  -1  -1 -29 535.648 190.973   3
   1   2 -27 243.255 158.924   2
  -1  -2  26-16.7772 135.813   1
   1   2 -26 43.1949 125.896   3
  -1  -2  25-8.83606 114.527   1
   1   2 -25 32.2204 122.040   3
  -1  -2  24 251.200 149.185   1
   1   2 -24-0.87078 125.025   3
  -1  -2  24 103.750 104.746   2
  -1  -2  23 1281.19 249.168   1
   1   2 -23 1453.19 257.725   3
  -1  -2  23 1072.69 198.903   2
   1   2 -22-137.795 127.688   3
  -1  -2  22-164.941 136.744   1
  -1  -2  22-92.7321 94.6495   2
  -1  -2  21 32.7075 107.671   1
  -1  -2  21 386.686 130.985   2
   1   2 -21 315.210 145.253   3
  -1  -2  20 8823.66 536.026   1
  -1  -2  20 9713.86 520.687   2
   1   2 -20 9315.61 549.156   3
  -1  -2  19 152.180 106.473   2
  -1  -2  19 8.51235 95.9429   1
   1   2 -19 48.6880 88.7834   3
  -1  -2  18 120.794 92.7763   2
  -1  -2  18 203.829 120.375   1
   1   2 -18-69.0759 90.3166   3
  -1  -2  18 307.959 76.6905   4
  -1  -2  17 29648.1 830.271   2
   1   2 -17 29318.3 885.136   3
  -1  -2  17 29203.9 571.456   4
   1   2 -16 1676.62 211.716   3
  -1  -2  16 1529.22 132.949   4
  -1  -2  16 1379.68 192.506   1
  -1  -2  16 1763.75 205.384   2
  -1  -2  15 470.546 81.7386   4
  -1  -2  15 213.814 93.3551   1
   1   2 -15 617.174 137.483   3
  -1  -2  15 413.536 101.869   2
  -1  -2  15 557.422 84.2971   4
   1   2 -14 187.251 77.8835   3
  -1  -2  14 159.841 55.3515   4
  -1  -2  14 318.611 100.377   1
  -1  -2  14 309.767 104.235   2
  -1  -2  14 368.984 68.8487   4
  -1  -2  13 2808.65 152.776   4
  -1  -2  13 2953.05 156.567   4
  -1  -2  13 2804.34 235.120   2
   1   2 -13 2377.10 225.342   3
  -1  -2  13 2554.29 235.224   1
  -1  -2  12 1782.65 117.376   4
  -1  -2  12 2219.35 209.401   2
  -1  -2  12 1768.30 193.331   1
  -1  -2  12 1747.50 114.364   4
   1   2 -12 1596.73 179.065   3
  -1  -2  11 4736.00 289.384   1
   1   2 -11 5337.47 307.233   3
  -1  -2  11 5850.78 312.101   2
  -1  -2  11 5695.06 191.975   4
  -1  -2  11 5647.67 192.324   4
   1   2 -10 7748.26 350.812   3
  -1  -2  10 7392.11 348.998   1
  -1  -2  10 7892.92 355.072   2
  -1  -2  10 8646.21 221.836   4
  -1  -2  10 8074.73 214.796   4
  -1  -2   9 144.545 35.4928   4
  -1  -2   9 131.906 65.6097   1
  -1  -2   9 217.468 41.0974   4
   1   2  -9 173.958 77.7222   3
  -1  -2   9 144.003 53.4772   2
  -1  -2   8 5863.55 157.962   4
   1   2  -8 5863.59 279.047   3
  -1  -2   8 5831.76 290.553   1
  -1  -2   8 6121.98 290.861   2
  -1  -2   8 5715.58 163.412   4
  -1  -2   7 8633.30 321.076   3
  -1  -2   7 8286.01 331.288   1
  -1  -2   7 8159.29 185.232   4
  -1  -2   7 8850.23 184.828   4
   1   2  -7 8828.84 321.035   3
   1   2  -6 1405.58 137.730   2
   1   2  -6 1821.23 155.439   1
  -1  -2   6 1761.17 146.679   3
  -1  -2   6 1645.03 81.0565   4
   1   2  -6 1342.05 132.848   2
  -1  -2   6 1716.96 150.134   1
  -1  -2   6 1605.43 78.5634   4
   1   2  -6 1653.27 141.231   3
   1   2  -5 331.293 39.0058   4
  -1  -2   5 252.241 72.3857   1
  -1  -2   5 420.304 44.2374   4
   1   2  -5 414.884 71.8805   3
  -1  -2   5 342.081 69.5945   3
   1   2  -5 375.619 81.6987   2
   1   2  -5 366.280 73.7668   1
   1   2  -5 325.928 80.1812   2
   1   2  -4 26587.8 515.311   1
  -1  -2   4 25249.2 299.584   4
  -1  -2   4 25528.3 506.423   1
  -1  -2   4 25894.2 446.938   3
   1   2  -4 25117.7 507.764   2
   1   2  -4 26243.6 444.569   3
   1   2  -4 25847.2 520.447   2
   1   2  -4 25414.7 302.966   4
  -1  -2   3 35.8756 38.8605   3
   1   2  -3-51.5775 44.5480   3
   1   2  -3 57.1672 47.5558   1
  -1  -2   3 1.10634 26.8010   4
   1   2  -3 78.0237 34.4736   4
   1   2  -3 0.09707 45.9512   2
  -1  -2   3 20.9538 49.8214   1
   1   2  -3 103.028 64.6089   2
   1   2  -2 1278.17 77.6379   4
   1   2  -2 1094.18 107.582   1
  -1  -2   2 1306.18 88.0766   3
  -1  -2   2 970.266 101.282   2
   1   2  -2 1107.37 79.3385   3
   1   2  -2 1235.61 110.873   2
  -1  -2   2 1094.68 110.662   1
  -1  -2   2 1156.03 75.9783   4
  -1  -2   1 475521. 2004.17   1
   1   2  -1 481103. 1389.56   3
   1   2  -1 473226. 1988.82   1
   1   2  -1 501841. 1543.57   4
  -1  -2   1 483737. 2008.12   2
   1   2  -1 479628. 2018.84   2
  -1  -2   1 495877. 1406.46   3
  -1  -2   1 499874. 1546.36   4
  -1  -2   0-1.52434 27.2955   3
   1   2   0 227.024 70.4115   1
   1   2   0 257.625 44.2791   3
  -1  -2   0 26.3345 56.5742   1
  -1  -2   0 11.4467 36.4421   4
   1   2   0 82.2099 45.5862   4
  -1  -2   0 138.864 63.7804   2
   1   2   1 1972.57 135.941   2
  -1  -2  -1 1840.94 128.662   2
  -1  -2  -1 1961.40 141.119   1
   1   2   1 2281.18 145.947   1
  -1  -2  -1 1864.18 116.243   4
   1   2   1 1761.57 111.434   4
   1   2   2 58046.4 697.980   1
   1   2   2 55522.3 653.423   2
   1   2   2 57037.7 620.628   4
  -1  -2  -2 56317.3 660.138   2
  -1  -2  -2 57079.0 635.995   4
  -1  -2  -2 58372.0 689.655   1
  -1  -2  -3 5735.42 214.194   4
  -1  -2  -3 5289.25 207.230   2
   1   2   3 5460.65 219.936   1
   1   2   3 5361.64 208.314   2
  -1  -2  -3 5795.13 227.926   1
   1   2   3 5505.58 210.103   4
  -1  -2  -4 2479.18 73.3435   3
  -1  -2  -4 2444.04 74.5716   3
   1   2   4 2480.04 154.598   1
  -1  -2  -4 2466.43 144.581   2
  -1  -2  -4 2604.02 157.685   1
   1   2   4 2533.39 148.204   2
  -1  -2  -4 2682.64 158.497   4
   1   2   4 2526.74 153.312   4
  -1  -2  -5 3542.41 175.614   2
  -1  -2  -5 3336.44 183.482   4
   1   2   5 3342.98 108.387   3
   1   2   5 3113.75 177.882   1
  -1  -2  -5 3680.18 109.341   3
   1   2   5 3450.73 188.589   4
   1   2   5 3707.96 179.492   2
   1   2   5 3579.38 197.046   1
  -1  -2  -6 5463.69 250.446   4
   1   2   6 5373.26 241.574   1
   1   2   6 5075.58 153.029   3
   1   2   6 5358.03 214.153   2
  -1  -2  -6 5470.01 156.724   3
   1   2   6 5568.95 246.970   1
  -1  -2  -6 5494.12 219.597   2
   1   2   6 5217.97 237.911   4
   1   2   7 44.9613 48.8716   4
  -1  -2  -7 61.9992 63.5914   4
   1   2   7 90.6525 57.2939   1
  -1  -2  -7-25.7209 43.6662   3
   1   2   7 125.853 56.1332   2
   1   2   7 10.6166 35.0402   3
  -1  -2  -7 81.9335 48.8581   2
  -1  -2  -8 8174.63 319.688   1
   1   2   8 7401.38 268.553   2
  -1  -2  -8 7753.84 237.259   3
  -1  -2  -8 7980.24 323.590   4
   1   2   8 7102.82 226.424   3
  -1  -2  -8 8292.95 285.953   2
   1   2   8 7847.47 313.827   1
  -1  -2  -9 642.785 116.046   4
   1   2   9 381.350 65.2935   3
   1   2   9 526.060 82.1273   2
  -1  -2  -9 577.083 90.2601   2
  -1  -2  -9 406.710 66.2178   3
   1   2   9 324.762 84.9782   1
  -1  -2 -10 865.925 105.377   2
   1   2  10 890.210 110.688   2
  -1  -2 -10 743.546 96.4915   3
   1   2  10 821.103 96.9772   3
  -1  -2 -10 726.175 117.286   4
   1   2  10 972.007 132.134   1
  -1  -2 -11 1083.43 143.197   4
   1   2  11 972.584 116.118   2
  -1  -2 -11 977.004 112.595   2
  -1  -2 -11 1048.67 118.476   3
   1   2  11 932.464 127.572   1
   1   2  11 998.898 114.712   3
  -1  -2 -12 46.0784 74.6513   4
   1   2  12-14.4222 57.7306   1
   1   2  12 6.06978 51.8906   2
  -1  -2 -12 68.1133 52.8557   3
   1   2  13 41.5391 63.1741   1
  -1  -2 -13 95.7547 74.1473   4
  -1  -2 -13 36.2534 49.6335   3
   1   2  13-27.9132 58.3655   2
   1   2  14 93.3528 67.4420   1
  -1  -2 -14-30.7490 54.3438   3
  -1  -2 -14 5.94961 68.7579   4
   1   2  14 45.9122 56.5047   2
   1   2  15 120.336 88.4144   1
   1   2  15 144.016 72.4903   2
  -1  -2 -15 352.797 104.656   3
  -1  -2 -15 110.109 78.7968   4
  -1  -2 -16 33.3094 68.1814   4
  -1  -2 -16 114.500 85.1380   3
   1   2  16-36.7786 52.9961   2
   1   2  16 4.48456 70.1428   1
  -1  -2 -17 92.0946 103.426   4
  -1  -2 -17 77.9206 76.8961   3
   1   2  17-29.5036 76.2071   1
   1   2  17-1.92604 61.5741   2
   1   2  18 105.641 68.7967   2
   1   2  18 136.711 87.9793   1
  -1  -2 -18-55.8893 90.4065   3
  -1  -2 -18 41.1458 74.5082   4
  -1  -2 -19 197.999 101.785   4
   1   2  19-1.78332 69.7245   2
   1   2  19 101.276 93.7633   1
  -1  -2 -19-51.8604 77.1017   3
   1   2  20 21.4779 71.1019   2
  -1  -2 -20-156.839 115.708   3
   1   2  20-213.088 110.831   1
  -1  -2 -20-74.2496 83.2112   4
  -1  -2 -21 69.3924 79.3200   4
  -1  -2 -21-114.757 111.907   3
   1   2  21 103.839 86.8387   2
   1   2  21-29.9937 90.8087   1
  -1  -2 -22-113.067 116.568   3
   1   2  22 5.75594 78.3743   2
   1   2  22 229.205 129.244   1
  -1  -2 -22 232.766 125.102   4
  -1  -2 -23-17.1339 101.213   3
   1   2  23 233.969 112.157   2
   1   2  23 186.448 125.624   1
  -1  -2 -23 164.205 109.077   4
   1   2  24 167.345 110.454   2
  -1  -2 -24 292.548 138.027   3
  -1  -2 -24-13.5774 86.5426   4
   1   2  24 278.249 149.326   1
  -1  -2 -25 253.742 126.712   4
  -1  -2 -25 241.308 159.134   3
   1   2  25 135.888 105.674   2
   1   2  25-3.84669 101.199   1
  -1  -2 -26 144.694 110.834   4
  -1  -2 -26 184.170 139.768   3
   1   2  26 308.755 137.081   2
   1   2  26 254.953 148.937   1
  -1  -2 -27 554.415 184.488   3
  -1  -2 -27 678.722 174.889   4
   1   2  27 618.668 188.101   1
  -1  -2 -28 291.502 180.195   3
  -1  -2 -28-116.682 133.179   4
   1   2  28-74.5472 124.745   1
  -1  -2 -29 49.6625 136.808   3
   1   3 -26 31.1876 126.491   2
   1   3 -25 82.1095 139.767   3
  -1  -3  25 94.0729 113.681   1
   1   3 -25-2.05045 118.962   2
   1   3 -24-87.3439 130.937   2
  -1  -3  24 121.212 126.590   1
   1   3 -24 68.8275 148.161   3
  -1  -3  23 224.941 145.391   1
   1   3 -23-24.1648 134.860   3
   1   3 -23 292.564 158.434   2
  -1  -3  22 33.4950 112.861   1
   1   3 -22-45.8998 137.888   3
   1   3 -22 148.615 127.196   2
   1   3 -21 1891.83 269.318   2
  -1  -3  21 2068.98 286.746   1
   1   3 -21 2093.19 288.454   3
   1   3 -20 220.686 134.095   2
  -1  -3  20 231.613 126.430   1
   1   3 -20 227.568 106.752   3
   1   3 -19 117.229 104.176   2
  -1  -3  19 56.4290 81.8795   1
   1   3 -19-32.9623 104.570   3
  -1  -3  18 911.761 196.949   1
   1   3 -18 760.512 169.035   3
   1   3 -18 643.182 154.089   2
  -1  -3  17 20.8293 90.7546   1
  -1  -3  17 109.759 57.0906   4
   1   3 -17 185.822 105.053   3
   1   3 -17 166.593 97.5630   2
  -1  -3  16-4.68762 43.9074   4
   1   3 -16-137.103 111.926   2
  -1  -3  16 25.9805 95.1572   1
   1   3 -16 157.691 100.720   3
  -1  -3  15 785.443 163.433   1
   1   3 -15 1228.72 189.163   2
  -1  -3  15 1062.42 110.374   4
   1   3 -15 1049.39 179.728   3
   1   3 -14 7076.88 403.943   2
  -1  -3  14 7908.67 276.737   4
  -1  -3  14 7069.47 420.361   1
   1   3 -14 7835.48 434.584   3
   1   3 -13 602.546 136.688   3
  -1  -3  13 753.933 87.6671   4
  -1  -3  13 728.286 150.549   1
  -1  -3  13 766.780 88.9447   4
   1   3 -13 943.830 157.517   2
  -1  -3  12-11.6743 69.6920   1
  -1  -3  12 48.0127 36.3676   4
  -1  -3  12 101.301 46.0252   4
   1   3 -12-103.564 84.5531   2
   1   3 -12-34.2739 83.1571   3
  -1  -3  11 2156.66 131.017   4
   1   3 -11 2004.19 207.292   2
   1   3 -11 2159.85 212.091   3
  -1  -3  11 2084.99 213.588   1
  -1  -3  11 2169.73 133.653   4
  -1  -3  10 8.49887 32.0057   4
  -1  -3  10 39.4847 34.8767   4
   1   3 -10 0.18262 57.2466   3
  -1  -3  10 13.4365 77.6869   1
   1   3 -10 12.6434 64.9098   2
  -1  -3   9 197.485 46.3075   4
   1   3  -9 200.766 91.8423   3
  -1  -3   9 176.621 46.4022   4
  -1  -3   9 235.389 87.0300   1
   1   3  -9 169.186 76.4042   2
  -1  -3   8 6800.23 338.964   1
   1   3  -8 7925.10 342.573   3
   1   3  -8 6703.33 336.065   2
  -1  -3   8 7552.78 226.569   4
  -1  -3   8 7762.30 233.249   4
   1   3  -7 1060.85 129.401   3
  -1  -3   7 1021.78 89.0440   4
  -1  -3   7 1220.93 149.419   1
   1   3  -7 1067.37 143.265   2
  -1  -3   7 955.949 83.1368   4
   1   3  -6 902.531 82.3943   4
  -1  -3   6 885.820 82.8985   4
   1   3  -6 1063.09 123.343   3
  -1  -3   6 844.846 120.826   1
   1   3  -6 1000.04 133.836   2
  -1  -3   5 3377.03 226.283   1
   1   3  -5 3851.11 235.131   2
   1   3  -5 3939.36 205.567   3
  -1  -3   5 3913.69 207.002   3
   1   3  -5 3630.90 157.325   4
  -1  -3   5 3791.85 160.625   4
   1   3  -4 363.489 84.0671   2
  -1  -3   4 432.026 99.5879   1
  -1  -3   4 310.522 70.9893   3
   1   3  -4 514.173 84.9843   3
  -1  -3   4 378.822 59.2295   4
   1   3  -4 389.459 65.5189   4
   1   3  -3 36.4316 60.1677   2
  -1  -3   3 20.7159 42.4046   3
   1   3  -3-38.3016 40.2581   3
  -1  -3   3-24.6103 40.5702   4
   1   3  -3 13.3170 33.9843   4
  -1  -3   3 119.389 67.1094   1
   1   3  -2 33346.9 639.821   2
  -1  -3   2 32559.7 626.827   2
   1   3  -2 32432.5 478.470   3
   1   3  -2 32678.6 618.602   1
   1   3  -2 32970.8 494.183   4
  -1  -3   2 31982.9 616.849   1
  -1  -3   2 33263.0 483.077   3
  -1  -3   2 32383.3 487.212   4
  -1  -3   1 65192.4 623.694   3
   1   3  -1 65794.4 717.930   4
   1   3  -1 64385.8 618.524   3
   1   3  -1 66036.8 864.207   1
  -1  -3   1 67684.9 874.471   1
  -1  -3   1 63119.6 710.239   4
   1   3  -1 68176.5 880.339   2
   1   3   0 9381.24 218.371   3
   1   3   0 9745.84 351.131   2
  -1  -3   0 9961.08 343.275   1
  -1  -3   0 9244.19 284.385   4
   1   3   0 9630.95 328.865   1
  -1  -3   0 9628.29 334.799   2
   1   3   0 9700.07 288.497   4
  -1  -3   0 9986.65 224.548   3
   1   3   1 0.98113 40.4086   4
   1   3   1 40.8067 53.5738   1
  -1  -3  -1-2.20382 49.0387   2
  -1  -3  -1-3.36656 40.0068   4
   1   3   1-16.7544 57.5764   2
  -1  -3  -1 45.7748 51.6179   1
  -1  -3  -1 19.6187 24.4380   3
   1   3   1 90.6994 32.5391   3
  -1  -3  -2 656.629 99.5882   1
   1   3   2 447.417 81.8457   2
  -1  -3  -2 494.437 87.4364   2
  -1  -3  -2 501.473 46.3781   3
   1   3   2 575.454 83.1789   4
   1   3   2 619.073 86.5043   1
   1   3   2 554.162 48.1750   3
  -1  -3  -2 444.901 84.2639   4
  -1  -3  -3 799.435 53.0088   3
   1   3   3 1003.55 114.950   1
  -1  -3  -3 1028.40 113.697   4
   1   3   3 822.963 104.475   4
  -1  -3  -3 1054.30 122.961   1
   1   3   3 938.942 55.1206   3
  -1  -3  -3 876.641 110.688   2
   1   3   3 884.700 112.372   2
  -1  -3  -4 2006.54 154.926   2
   1   3   4 1995.54 157.197   1
  -1  -3  -4 1954.16 83.0071   3
  -1  -3  -4 1977.58 84.7522   3
   1   3   4 1884.50 150.378   4
  -1  -3  -4 1855.06 146.362   4
  -1  -3  -4 2004.38 158.556   1
   1   3   4 2063.98 163.791   2
   1   3   5 1333.39 131.620   1
  -1  -3  -5 1333.04 131.012   1
   1   3   5 1466.10 138.336   4
   1   3   5 1258.36 133.343   2
  -1  -3  -5 1264.25 73.6973   3
  -1  -3  -5 1179.58 119.789   2
  -1  -3  -5 1279.52 72.3975   3
  -1  -3  -5 1172.04 128.764   4
   1   3   6 1828.50 155.007   2
  -1  -3  -6 2157.72 102.108   3
   1   3   6 2100.90 171.830   1
   1   3   6 2036.61 163.952   1
  -1  -3  -6 2154.91 176.525   4
  -1  -3  -6 1940.57 158.503   2
  -1  -3  -6 2030.87 100.617   3
   1   3   7 1729.30 151.292   2
  -1  -3  -7 1794.80 103.672   3
   1   3   7 1863.73 164.589   1
  -1  -3  -7 1883.06 105.098   3
  -1  -3  -7 1748.06 160.757   4
  -1  -3  -7 2017.85 165.271   2
  -1  -3  -8 17727.0 507.595   4
  -1  -3  -8 18548.5 353.258   3
   1   3   8 17857.7 504.725   1
   1   3   8 18263.5 480.215   2
   1   3   9 2110.95 172.499   2
  -1  -3  -9 2427.38 142.739   3
   1   3   9 2124.04 183.369   1
   1   3   9 2200.49 138.131   3
  -1  -3  -9 2201.98 192.635   4
   1   3  10 1019.34 136.479   1
   1   3  10 885.376 100.251   3
  -1  -3 -10 1015.19 103.205   3
   1   3  10 851.467 116.101   2
  -1  -3 -10 1066.47 142.834   4
  -1  -3 -11 2033.97 194.996   4
   1   3  11 1874.39 173.560   2
   1   3  11 1929.21 182.120   1
  -1  -3 -11 2103.38 154.692   3
   1   3  12 27.9046 46.5143   3
   1   3  12 103.421 69.5907   1
   1   3  12 80.5420 66.2461   2
  -1  -3 -12 113.929 51.2650   3
  -1  -3 -12 112.171 63.0670   4
  -1  -3 -13 136.778 87.2171   4
  -1  -3 -13 292.711 80.0486   3
   1   3  13 277.390 86.9982   2
   1   3  13 241.744 90.1803   1
   1   3  14 8277.43 377.040   2
  -1  -3 -14 8214.61 346.003   3
   1   3  14 8709.96 417.696   1
  -1  -3 -14 8326.70 418.276   4
  -1  -3 -15 151.387 86.9323   4
  -1  -3 -15-31.3533 54.0152   3
   1   3  15 179.784 84.9930   1
   1   3  15 36.0229 63.5853   2
  -1  -3 -16 1309.96 185.626   4
   1   3  16 1102.17 157.728   2
  -1  -3 -16 1204.37 155.245   3
   1   3  16 934.717 157.148   1
   1   3  17 10987.0 463.031   2
  -1  -3 -17 10609.7 453.458   3
  -1  -3 -17 10489.8 508.873   4
   1   3  17 10890.3 510.749   1
   1   3  18 10944.2 471.479   2
  -1  -3 -18 10006.8 456.475   3
   1   3  18 11095.9 527.559   1
  -1  -3 -18 10018.3 500.640   4
   1   3  19 591.935 148.893   1
  -1  -3 -19 612.633 141.922   3
   1   3  19 707.313 139.974   2
  -1  -3 -19 525.920 128.322   4
   1   3  20 152.300 108.711   1
  -1  -3 -20-11.2227 85.7390   4
  -1  -3 -20 69.9558 76.6725   3
   1   3  20-112.149 78.8893   2
  -1  -3 -21 86.9956 99.3316   3
   1   3  21 1.55398 89.6397   1
   1   3  21 31.7127 69.9129   2
  -1  -3 -21 181.027 99.4141   4
  -1  -3 -22-18.1757 94.7349   4
   1   3  22 48.9638 87.8313   2
   1   3  22 97.4258 110.348   1
  -1  -3 -22 62.3867 88.8821   3
  -1  -3 -23 45.2148 98.4032   3
  -1  -3 -23-99.5322 105.384   4
   1   3  23-82.1589 81.0349   2
   1   3  23-92.3695 101.599   1
  -1  -3 -24 200.142 115.543   4
   1   3  24 16.9913 95.7801   2
   1   3  24-50.5159 105.987   1
  -1  -3 -24-195.660 124.676   3
  -1  -3 -25 233.780 121.173   4
   1   3  25-86.2662 106.256   2
  -1  -3 -25 31.1296 116.391   3
   1   3  25-64.5916 105.230   1
  -1  -3 -26 30.2433 113.838   3
   1   3  26-154.599 114.453   2
   1   3  26 177.452 146.379   1
  -1  -3 -26 117.128 120.804   4
  -1  -3 -27 9774.74 600.774   4
  -1  -3 -27 9833.39 623.014   3
   1   3  27 8951.76 608.569   1
  -1  -3 -28 595.172 182.544   3
  -1  -3 -28 614.068 193.235   4
   1   3  28 892.583 226.657   1
  -1  -3 -29 126.569 153.502   4
   1   4 -25 318.052 147.201   2
   1   4 -24-46.8873 120.033   2
  -1  -4  24 14.3085 132.887   1
   1   4 -23 103.403 126.893   3
  -1  -4  23 96.3299 160.216   1
   1   4 -23 57.9367 140.754   2
   1   4 -22 201.592 120.917   3
  -1  -4  22 170.307 131.883   1
   1   4 -22 202.738 150.425   2
   1   4 -21 479.828 173.037   3
  -1  -4  21 665.256 186.234   1
   1   4 -21 336.306 150.472   2
   1   4 -20 108.367 117.976   3
  -1  -4  20-121.156 139.162   1
   1   4 -20 324.998 156.837   2
   1   4 -19 166.591 123.923   2
   1   4 -19 204.053 128.210   3
  -1  -4  19-80.8364 115.735   1
   1   4 -18 1908.28 258.896   3
  -1  -4  18 1632.25 260.657   1
   1   4 -18 1361.31 227.517   2
  -1  -4  17 1702.85 247.558   1
   1   4 -17 1888.24 254.030   3
   1   4 -17 2251.73 275.229   2
   1   4 -16 638.088 149.528   3
  -1  -4  16 534.847 154.379   1
   1   4 -16 822.603 178.363   2
   1   4 -15 2002.08 243.976   2
  -1  -4  15 1767.01 148.185   4
   1   4 -15 1886.85 237.325   3
  -1  -4  15 1717.49 237.283   1
  -1  -4  14 220.024 63.5120   4
   1   4 -14 430.180 136.100   3
  -1  -4  14 300.903 122.943   1
   1   4 -14 77.8807 81.9147   2
   1   4 -13-109.339 89.4554   3
  -1  -4  13 40.1172 81.6410   1
  -1  -4  13 66.5777 50.4060   4
   1   4 -13 70.3668 100.569   2
  -1  -4  12 4718.45 227.198   4
   1   4 -12 4245.61 315.563   3
  -1  -4  12 4216.55 330.800   1
   1   4 -12 4347.44 324.475   2
  -1  -4  12 4384.30 214.012   4
   1   4 -11-52.1594 77.1076   2
   1   4 -11 25.8557 69.6160   3
  -1  -4  11 122.108 56.5078   4
  -1  -4  11-26.2504 69.8657   1
  -1  -4  11-20.2041 45.3759   4
  -1  -4  10 30.5382 38.3895   4
  -1  -4  10 18.2263 38.9065   4
   1   4 -10 27.8699 65.2504   3
   1   4 -10 107.290 76.6307   2
  -1  -4  10 59.5386 74.8701   1
   1   4  -9-22.0048 75.3305   2
  -1  -4   9 80.7842 49.9704   4
  -1  -4   9-23.6290 48.8629   4
   1   4  -9-72.2880 82.1477   3
  -1  -4   9 101.360 87.2399   1
  -1  -4   8 7882.65 282.433   4
   1   4  -8 6997.85 348.830   3
  -1  -4   8 7171.54 267.950   4
  -1  -4   8 6745.24 371.044   1
   1   4  -8 6603.04 365.661   2
   1   4  -7 18.2944 40.6482   4
  -1  -4   7 102.524 74.8795   1
   1   4  -7 117.249 71.2622   3
   1   4  -7 34.3961 66.1676   2
  -1  -4   7-39.4790 37.5425   4
  -1  -4   6 1258.18 116.558   4
  -1  -4   6 1069.53 153.308   1
   1   4  -6 1187.29 157.738   2
   1   4  -6 1081.16 134.703   3
   1   4  -6 1138.24 115.866   4
  -1  -4   5 2402.14 214.049   1
   1   4  -5 2331.68 179.538   3
   1   4  -5 2298.81 157.384   4
  -1  -4   5 2033.53 147.682   4
   1   4  -5 2169.89 201.858   2
   1   4  -4 94.7985 78.2480   2
   1   4  -4 31.2879 39.8095   4
  -1  -4   4-99.0110 74.4117   1
  -1  -4   4 111.537 63.0092   3
   1   4  -4 48.4204 52.7553   3
  -1  -4   4-19.6325 44.2360   4
  -1  -4   3 1920.50 143.236   3
   1   4  -3 1770.83 140.650   3
  -1  -4   3 1771.30 176.998   1
   1   4  -3 1494.33 162.989   2
  -1  -4   3 1605.21 133.752   4
   1   4  -3 1614.74 135.910   4
   1   4  -2 138400. 1116.06   3
   1   4  -2 141816. 1488.85   2
  -1  -4   2 140329. 1211.27   4
  -1  -4   2 140257. 1445.62   1
   1   4  -2 141017. 1227.98   4
  -1  -4   2 139680. 1133.34   3
   1   4  -1 1662.43 184.302   2
  -1  -4   1 1420.61 118.230   3
   1   4  -1 1540.42 144.904   4
   1   4  -1 1587.83 125.019   3
  -1  -4   1 1282.32 152.488   1
  -1  -4   1 1303.15 132.682   4
  -1  -4   0 3445.94 162.069   3
   1   4   0 3312.88 162.892   3
  -1  -4   0 3424.06 230.273   1
  -1  -4   0 3273.20 204.011   4
   1   4   0 3220.43 196.290   4
   1   4   0 2983.86 225.221   2
   1   4   1 29052.8 673.338   2
   1   4   1 27386.3 426.909   3
  -1  -4  -1 29065.6 645.493   1
  -1  -4  -1 28999.2 432.002   3
  -1  -4  -1 28440.3 585.125   4
   1   4   1 27281.9 574.433   4
  -1  -4  -2 882.799 77.4167   3
   1   4   2 1092.63 82.7809   3
   1   4   2 1163.22 148.072   2
  -1  -4  -2 829.678 112.253   4
  -1  -4  -2 821.339 130.259   1
  -1  -4  -3 597.335 62.4196   3
  -1  -4  -3 761.457 112.594   1
   1   4   3 728.189 67.6249   3
   1   4   3 783.910 126.832   2
  -1  -4  -3 632.375 103.414   4
   1   4   4 8611.84 364.989   2
   1   4   4 9087.25 209.341   3
  -1  -4  -4 8614.96 348.328   1
  -1  -4  -4 8115.40 342.564   4
  -1  -4  -4 8756.26 212.880   3
  -1  -4  -5 6203.89 181.229   3
  -1  -4  -5 5482.84 291.142   4
  -1  -4  -5 5974.79 182.225   3
  -1  -4  -5 5947.23 294.866   1
   1   4   5 5911.81 309.824   2
  -1  -4  -6 753.227 70.7937   3
  -1  -4  -6 754.736 72.5854   3
   1   4   6 825.709 129.245   2
  -1  -4  -6 705.697 122.359   4
  -1  -4  -6 718.029 117.296   1
   1   4   7 5795.87 307.521   2
  -1  -4  -7 5308.59 302.504   4
  -1  -4  -7 5838.12 193.336   3
   1   4   7 5315.85 293.516   1
  -1  -4  -7 5701.67 191.657   3
  -1  -4  -8 3624.33 161.393   3
  -1  -4  -8 3258.94 156.466   3
   1   4   8 3165.69 229.534   2
   1   4   8 2957.97 224.686   1
  -1  -4  -8 3120.40 239.309   4
   1   4   9 3571.51 247.296   2
  -1  -4  -9 3710.99 176.583   3
   1   4   9 3608.54 251.834   1
  -1  -4  -9 3498.15 172.246   3
  -1  -4  -9 3043.72 239.790   4
   1   4  10 5453.89 310.352   2
  -1  -4 -10 4966.01 306.386   4
  -1  -4 -10 5584.42 228.077   3
  -1  -4 -10 5692.89 233.645   3
   1   4  10 5229.10 305.622   1
   1   4  11 46.2072 68.5876   1
  -1  -4 -11 106.143 51.4915   3
   1   4  11 10.6543 57.6221   2
  -1  -4 -11-35.2675 42.6185   3
  -1  -4 -11-60.0885 68.4946   4
  -1  -4 -12 187.828 89.3378   4
   1   4  12 218.185 80.6562   2
   1   4  12 166.517 87.3401   1
  -1  -4 -12 31.9121 45.7396   3
  -1  -4 -12 218.082 65.4154   3
   1   4  13 180.173 93.6345   1
  -1  -4 -13 150.090 80.8576   4
   1   4  13 86.6566 77.4497   2
  -1  -4 -13 103.164 48.4304   3
   1   4  14 21840.9 654.777   2
  -1  -4 -14 23490.9 730.857   4
  -1  -4 -14 22109.7 555.519   3
   1   4  14 22731.0 694.039   1
  -1  -4 -15 139.849 91.4817   4
   1   4  15-112.008 80.9650   1
  -1  -4 -15 33.7286 73.2714   3
   1   4  15 50.0471 78.9935   2
   1   4  16 71.6175 80.1968   2
   1   4  16-26.5637 69.9836   1
  -1  -4 -16 85.5849 71.4517   3
  -1  -4 -16-6.64610 75.6423   4
   1   4  17 7811.43 419.273   2
  -1  -4 -17 7068.03 361.477   3
   1   4  17 7274.23 428.930   1
  -1  -4 -17 7393.36 446.503   4
  -1  -4 -18 52.9411 83.8029   4
  -1  -4 -18-91.0367 90.6678   3
   1   4  18-60.7155 78.7354   2
   1   4  18-48.8364 81.6682   1
  -1  -4 -19 177.756 101.067   4
   1   4  19 19.3130 82.0212   2
  -1  -4 -19 63.0328 76.2349   3
   1   4  19 33.9432 83.9292   1
  -1  -4 -20-34.3802 86.8829   4
   1   4  20-2.63875 79.5034   2
  -1  -4 -20 64.4277 86.6025   3
   1   4  20-72.4512 100.959   1
  -1  -4 -21 90.4154 110.711   4
  -1  -4 -21 13.3892 85.0850   3
   1   4  21 16.0418 90.5129   2
   1   4  21 76.9291 109.848   1
  -1  -4 -22 85.6736 95.9758   4
  -1  -4 -22-62.4984 84.8261   3
   1   4  22-10.6343 80.7688   2
   1   4  22-20.1091 101.221   1
  -1  -4 -23 145.242 109.737   3
   1   4  23 70.8235 86.5987   2
   1   4  23 97.8904 113.453   1
  -1  -4 -23 71.7449 99.3071   4
  -1  -4 -24-129.121 135.938   4
  -1  -4 -24-39.6990 90.2993   3
   1   4  24 67.0042 120.079   2
   1   4  24-53.0515 105.480   1
   1   4  25 191.313 106.279   1
  -1  -4 -25 186.350 144.591   3
   1   4  25 189.559 119.021   2
  -1  -4 -25 83.8882 129.749   4
  -1  -4 -26 192.076 134.431   4
  -1  -4 -26-120.598 139.239   3
   1   4  26 200.615 129.291   2
   1   4  26 401.275 173.255   1
   1   4  27 24.0013 113.870   2
  -1  -4 -27 69.2009 109.651   4
  -1  -4 -27-11.3837 117.154   3
   1   4  27 104.147 137.700   1
  -1  -4 -28-13.2033 121.427   4
  -1  -4 -28-207.969 159.388   3
   1   4  28 36.3346 139.299   1
  -1  -4 -29 163.216 161.271   4
   1   5 -23-145.109 149.259   2
  -1  -5  22 238.718 152.057   1
   1   5 -22 336.032 174.500   3
   1   5 -22 511.602 188.455   2
   1   5 -21 202.543 148.803   2
   1   5 -21-32.5855 119.622   3
  -1  -5  21-98.1943 126.931   1
   1   5 -20-16.0665 128.637   3
  -1  -5  20 15.1517 105.374   1
   1   5 -20 199.615 124.529   2
   1   5 -19 439.108 169.976   2
  -1  -5  19 406.599 156.110   1
   1   5 -19 340.670 149.152   3
   1   5 -18 2207.50 300.405   3
  -1  -5  18 2089.65 295.456   1
   1   5 -18 1797.96 259.076   2
   1   5 -17-78.0898 122.661   2
   1   5 -17 261.377 141.080   3
  -1  -5  17 180.475 113.158   1
   1   5 -16 683.986 162.673   2
   1   5 -16 1329.14 220.571   3
  -1  -5  16 1077.02 217.797   1
   1   5 -15 1851.30 246.077   3
  -1  -5  15 1688.02 251.668   1
   1   5 -15 1948.82 257.984   2
   1   5 -14 44.5737 92.2966   2
   1   5 -14-46.9133 92.1010   3
  -1  -5  13 95.0313 56.9487   4
   1   5 -13-12.2858 79.6132   3
  -1  -5  13 81.8721 86.8031   1
   1   5 -13-107.017 113.116   2
  -1  -5  12-0.95441 45.9180   4
   1   5 -12 82.6944 79.0019   3
   1   5 -12-57.4600 76.5166   2
  -1  -5  12-53.2397 95.7014   1
  -1  -5  11 196.625 68.1725   4
   1   5 -11-12.9430 83.0193   2
  -1  -5  11 43.3312 89.2588   1
   1   5 -11 110.679 82.0742   3
  -1  -5  10 207.876 63.8561   4
   1   5 -10 204.904 95.0190   2
   1   5 -10 269.663 111.804   3
  -1  -5  10 152.254 89.2440   1
  -1  -5   9 3535.14 217.355   4
  -1  -5   9 3844.91 315.613   1
   1   5  -9 3924.27 289.656   3
   1   5  -9 3820.01 307.314   2
   1   5  -8 172.492 89.1651   3
  -1  -5   8 61.4282 55.3701   4
   1   5  -8 51.9431 75.3155   2
  -1  -5   8-47.7688 76.5155   1
   1   5  -7-46.2278 83.9549   2
  -1  -5   7-44.0865 71.4477   1
  -1  -5   7-35.1000 50.7474   4
   1   5  -7-26.6883 60.0733   3
   1   5  -6 2252.63 194.324   3
  -1  -5   6 1998.46 166.552   4
   1   5  -6 1841.02 209.618   2
  -1  -5   6 2218.76 223.988   1
  -1  -5   5 665.983 135.953   1
  -1  -5   5 790.170 114.236   4
   1   5  -5 841.172 122.529   3
   1   5  -5 615.681 132.023   2
  -1  -5   4 405.181 104.871   1
   1   5  -4 442.588 90.7152   3
  -1  -5   4 412.973 89.4223   4
   1   5  -4 485.762 115.555   2
  -1  -5   3 537.943 100.409   4
   1   5  -3 517.300 125.693   2
  -1  -5   3 623.921 125.415   1
   1   5  -3 611.086 98.6354   3
   1   5  -2 3302.45 262.541   2
   1   5  -2 3082.86 194.448   3
  -1  -5   2 2984.78 240.225   1
  -1  -5   2 2995.43 193.694   3
  -1  -5   2 3027.63 213.066   4
   1   5  -1 268.683 91.4072   2
  -1  -5   1 195.064 58.6874   3
   1   5  -1 189.477 56.7463   3
  -1  -5   1 215.259 96.0274   1
  -1  -5   1 299.298 88.6845   4
  -1  -5   0 675.723 91.9072   3
  -1  -5   0 615.070 103.858   4
   1   5   0 580.509 121.523   2
  -1  -5   0 661.994 121.973   1
   1   5   0 516.214 74.7690   3
   1   5   1 2042.81 139.431   3
  -1  -5  -1 2330.45 195.938   4
  -1  -5  -1 2237.77 144.863   3
  -1  -5  -1 2088.76 200.366   1
   1   5   1 1851.18 197.100   2
  -1  -5  -2 131.900 49.1725   3
  -1  -5  -2 174.675 64.6927   1
  -1  -5  -2 121.151 75.4772   4
   1   5   2 196.437 53.3441   3
   1   5   2 263.261 100.799   2
   1   5   3-1.90597 35.6350   3
   1   5   3 59.6189 79.0000   2
  -1  -5  -3 34.3981 66.8757   4
  -1  -5  -3-5.72597 53.1168   1
  -1  -5  -3 92.0372 43.3261   3
  -1  -5  -4 3799.45 169.759   3
  -1  -5  -4 3478.21 245.707   1
   1   5   4 3905.53 167.950   3
  -1  -5  -4 3295.59 244.354   4
   1   5   4 3959.16 282.748   2
  -1  -5  -5 526.425 114.960   4
  -1  -5  -5 565.756 71.9366   3
   1   5   5 525.747 123.169   2
   1   5   5 687.427 74.7160   3
  -1  -5  -5 617.887 120.594   1
  -1  -5  -6 1122.67 94.3759   3
   1   5   6 1249.37 162.459   2
  -1  -5  -6 1131.88 96.1955   3
  -1  -5  -6 1229.60 156.256   1
  -1  -5  -6 1146.61 156.169   4
  -1  -5  -7 2577.59 146.585   3
  -1  -5  -7 2829.27 225.866   1
  -1  -5  -7 2544.48 145.368   3
  -1  -5  -7 2547.94 227.649   4
   1   5   7 2490.83 228.643   2
   1   5   8 1152.96 164.224   2
  -1  -5  -8 1119.24 102.821   3
  -1  -5  -8 1160.34 100.516   3
   1   5   8 1138.03 154.944   1
  -1  -5  -8 895.953 137.434   4
  -1  -5  -9 368.509 66.2348   3
   1   5   9 340.592 108.289   2
   1   5   9 457.165 112.883   1
  -1  -5  -9 332.401 62.2163   3
  -1  -5  -9 289.903 105.608   4
  -1  -5 -10 6241.11 249.765   3
   1   5  10 5299.34 339.175   2
  -1  -5 -10 5928.22 245.970   3
   1   5  10 5343.25 329.660   1
  -1  -5 -10 5335.92 343.174   4
  -1  -5 -11 67.6798 54.0141   3
   1   5  11 39.7438 67.0703   2
   1   5  11 76.4706 75.3230   1
  -1  -5 -11 0.22966 41.7756   3
  -1  -5 -11-65.5762 76.1383   4
   1   5  12 44.5860 74.8969   1
   1   5  12 189.747 106.536   2
  -1  -5 -12 104.904 60.9681   3
  -1  -5 -12-36.9814 88.3654   4
  -1  -5 -12 2.90442 55.6973   3
  -1  -5 -13-0.25635 86.9176   4
   1   5  13 32.1345 71.2402   2
  -1  -5 -13 60.2725 62.7310   3
   1   5  13-37.0970 71.4287   1
  -1  -5 -14 2573.55 265.383   4
  -1  -5 -14 2762.23 202.800   3
   1   5  14 2816.66 262.978   1
   1   5  14 2572.70 249.406   2
  -1  -5 -15-20.7233 94.5202   4
   1   5  15-5.03323 76.5512   1
   1   5  15-24.3413 82.9324   2
  -1  -5 -15 38.1019 56.0639   3
  -1  -5 -16 1400.60 209.220   4
   1   5  16 1367.41 193.716   2
  -1  -5 -16 948.355 137.873   3
   1   5  16 1568.82 208.496   1
   1   5  17 3886.10 326.546   2
  -1  -5 -17 3541.90 260.083   3
   1   5  17 3759.04 327.688   1
  -1  -5 -17 2987.09 305.964   4
   1   5  18-24.6859 95.7274   1
  -1  -5 -18 98.8576 72.9432   3
   1   5  18 215.853 119.376   2
   1   5  19 276.748 128.295   2
  -1  -5 -19 125.500 116.650   4
   1   5  19-50.8330 86.9149   1
  -1  -5 -19 72.6279 82.1711   3
  -1  -5 -20 322.443 131.784   4
  -1  -5 -20 574.214 134.117   3
   1   5  20 568.706 157.036   1
   1   5  20 680.879 168.146   2
  -1  -5 -21 133.294 107.670   4
  -1  -5 -21-34.1608 80.7603   3
   1   5  21-24.2263 97.5348   1
   1   5  21 118.245 114.034   2
  -1  -5 -22 40.6955 94.9496   3
   1   5  22 82.0743 121.060   1
   1   5  22-190.692 136.440   2
  -1  -5 -22-9.11162 106.820   4
  -1  -5 -23-27.9092 104.419   4
   1   5  23 99.6948 107.332   2
   1   5  23 83.6997 109.135   1
  -1  -5 -23 89.6355 105.262   3
  -1  -5 -24-7.94674 122.263   4
  -1  -5 -24 126.345 91.7812   3
   1   5  24-26.3576 106.022   2
   1   5  24 166.294 117.312   1
   1   5  25 261.647 140.346   2
  -1  -5 -25 196.094 119.811   4
   1   5  25 262.680 143.498   1
   1   5  26 5743.48 489.207   1
  -1  -5 -26 5144.52 471.727   4
   1   5  26 5845.43 463.965   2
  -1  -5 -27 1373.10 267.135   4
   1   5  27 829.227 206.199   2
   1   5  27 692.770 205.570   1
   1   5  28 103.421 126.485   1
   1   6 -22 198.312 175.509   2
   1   6 -21 94.9952 132.592   3
   1   6 -21-4.79255 137.622   2
  -1  -6  20-235.997 169.646   1
   1   6 -20 276.002 187.915   3
   1   6 -20 299.016 171.070   2
   1   6 -19 1621.85 273.485   2
   1   6 -19 1522.38 275.144   3
  -1  -6  19 1471.66 275.425   1
  -1  -6  18 573.327 181.453   1
   1   6 -18 226.468 154.778   3
   1   6 -18 120.732 119.748   2
   1   6 -17 121.689 126.157   2
   1   6 -17 258.928 150.223   3
  -1  -6  17-124.316 136.333   1
   1   6 -16 1084.02 216.061   3
  -1  -6  16 1259.31 255.213   1
   1   6 -16 1226.74 227.258   2
  -1  -6  15 3782.17 388.216   1
   1   6 -15 4168.84 378.449   3
   1   6 -15 3821.80 373.184   2
  -1  -6  14 132.477 97.9224   1
   1   6 -14 368.800 143.868   3
   1   6 -14 397.218 147.978   2
  -1  -6  13 1105.62 214.020   1
   1   6 -13 1170.02 199.829   3
   1   6 -13 1303.83 231.178   2
   1   6 -12 2269.16 255.174   3
  -1  -6  12 2211.70 276.817   1
  -1  -6  12 2237.87 202.353   4
   1   6 -12 2289.70 269.610   2
  -1  -6  11-10.7018 53.9041   4
   1   6 -11-23.6863 83.6754   2
   1   6 -11 106.785 77.4147   3
  -1  -6  11-48.8127 79.7415   1
   1   6 -10 1339.68 189.489   3
  -1  -6  10 1306.70 156.625   4
  -1  -6  10 1034.18 189.318   1
   1   6 -10 1429.49 217.481   2
   1   6  -9 846.193 157.475   3
  -1  -6   9 795.764 121.586   4
   1   6  -9 678.864 163.938   2
   1   6  -8 1190.67 200.868   2
  -1  -6   8 1000.36 178.528   1
   1   6  -8 697.594 135.912   3
  -1  -6   8 856.362 126.289   4
   1   6  -7 2539.16 233.680   3
  -1  -6   7 3181.44 300.944   1
   1   6  -7 3046.11 304.110   2
  -1  -6   7 2482.55 205.504   4
  -1  -6   6 344.009 117.723   1
   1   6  -6 304.999 101.207   3
   1   6  -6 116.945 90.4605   2
  -1  -6   6 418.928 100.433   4
  -1  -6   5 639.350 114.677   4
   1   6  -5 814.852 131.914   3
   1   6  -5 578.112 147.485   2
  -1  -6   5 792.764 151.558   1
   1   6  -4 1572.97 169.262   3
  -1  -6   4 1711.54 208.802   1
   1   6  -4 1573.04 212.816   2
  -1  -6   4 1377.14 165.112   4
   1   6  -3 2507.31 203.965   3
  -1  -6   3 2351.91 207.286   4
   1   6  -3 2345.82 254.043   2
  -1  -6   3 2229.80 234.933   1
   1   6  -2 365.914 114.207   2
  -1  -6   2 403.971 106.039   4
   1   6  -2 555.183 102.917   3
  -1  -6   2 584.701 134.100   1
  -1  -6   1 440.517 104.213   4
   1   6  -1 368.930 117.500   2
   1   6  -1 527.228 97.7378   3
  -1  -6   1 454.691 113.281   1
   1   6   0 513.354 126.281   2
  -1  -6   0 447.988 114.107   4
   1   6   0 492.683 92.9480   3
  -1  -6   0 435.660 112.623   1
   1   6   1 760.669 153.835   2
  -1  -6  -1 757.607 105.125   3
   1   6   1 826.843 102.126   3
  -1  -6  -1 884.487 147.620   1
  -1  -6  -1 746.080 133.151   4
   1   6   2 96.0790 107.417   2
  -1  -6  -2 86.7219 82.2917   4
  -1  -6  -2 114.601 54.0559   3
  -1  -6  -2 32.3893 68.8227   1
   1   6   2 129.388 59.0285   3
  -1  -6  -3 4738.00 313.828   1
  -1  -6  -3 4604.08 220.542   3
   1   6   3 4977.12 224.598   3
   1   6   3 4285.63 327.801   2
  -1  -6  -3 4080.98 291.192   4
   1   6   4-39.3960 88.4249   2
  -1  -6  -4-28.4542 76.0313   4
   1   6   4 23.0881 44.8900   3
  -1  -6  -4 10.9388 72.0449   1
  -1  -6  -4 6.94155 39.6109   3
  -1  -6  -5 485.104 123.051   1
  -1  -6  -5 241.791 57.3739   3
   1   6   5 362.085 117.509   2
   1   6   5 396.964 67.1682   3
  -1  -6  -5 242.425 106.336   4
  -1  -6  -6 202.500 82.5552   4
   1   6   6 235.042 103.100   2
  -1  -6  -6 204.055 58.4633   3
  -1  -6  -6 83.0296 71.0184   1
  -1  -6  -7 3438.88 273.336   1
  -1  -6  -7 3911.66 197.862   3
  -1  -6  -7 3518.54 186.782   3
   1   6   7 3684.88 309.307   2
  -1  -6  -7 3439.08 288.142   4
   1   6   8 202.818 97.9142   2
  -1  -6  -8 380.382 77.9678   3
  -1  -6  -8 327.175 104.261   1
  -1  -6  -8 425.167 122.849   4
  -1  -6  -8 328.784 67.8749   3
   1   6   9 284.534 105.440   1
  -1  -6  -9 293.960 120.689   4
  -1  -6  -9 311.723 76.1911   3
  -1  -6  -9 292.355 66.7953   3
   1   6   9 269.454 106.849   2
   1   6  10 1782.78 218.285   2
  -1  -6 -10 1556.58 134.850   3
   1   6  10 1545.77 200.909   1
  -1  -6 -10 1768.96 227.392   4
   1   6  11 40.3083 72.3168   1
   1   6  11 86.8807 110.199   2
  -1  -6 -11-37.8937 47.5915   3
  -1  -6 -11 56.6399 102.115   4
  -1  -6 -12 516.127 135.551   4
  -1  -6 -12 747.762 107.894   3
   1   6  12 760.151 156.499   1
   1   6  12 576.833 134.491   2
   1   6  13 12332.3 557.633   1
  -1  -6 -13 11650.4 571.016   4
   1   6  13 11801.9 560.721   2
  -1  -6 -13 11796.6 398.762   3
  -1  -6 -14 134.750 71.8096   3
  -1  -6 -14 20.8620 106.755   4
   1   6  14 272.867 124.787   2
   1   6  14 194.119 99.0708   1
   1   6  15 94.0223 108.037   2
  -1  -6 -15 91.1001 101.630   4
   1   6  15-38.4383 88.9101   1
  -1  -6 -15 192.684 85.4646   3
  -1  -6 -16 7209.80 350.351   3
   1   6  16 8299.53 480.598   1
   1   6  16 7931.45 482.885   2
  -1  -6 -16 8395.89 516.730   4
  -1  -6 -17 16.0374 114.254   4
   1   6  17 102.315 108.631   1
   1   6  17 103.489 94.0423   2
  -1  -6 -17 55.0626 76.6167   3
  -1  -6 -18-136.736 128.824   4
   1   6  18 18.9193 87.2246   1
   1   6  18 25.6866 102.501   2
  -1  -6 -18 8.08677 75.4941   3
   1   6  19 112.414 106.955   2
  -1  -6 -19 11.9314 97.7590   4
   1   6  19 70.4623 106.725   1
  -1  -6 -19-16.5120 74.6700   3
  -1  -6 -20 92.1483 100.649   4
   1   6  20 203.659 125.921   1
   1   6  20 40.2244 93.3324   2
   1   6  21-64.3307 97.2384   1
   1   6  21 31.4965 93.1199   2
  -1  -6 -21 58.8368 114.365   4
  -1  -6 -22 57.4891 112.377   4
   1   6  22-20.9077 97.5881   1
   1   6  22 95.3649 121.577   2
  -1  -6 -23 156.832 150.998   4
   1   6  23-62.3492 135.764   1
   1   6  23 75.4230 120.601   2
  -1  -6 -24 216.240 127.692   4
   1   6  24 372.814 159.421   2
   1   6  24-55.3181 107.266   1
   1   6  25 912.117 221.598   2
  -1  -6 -25 780.058 220.641   4
   1   6  25 1045.15 234.286   1
  -1  -6 -26 81.5038 132.311   4
   1   6  26 371.027 164.288   2
   1   6  26 289.622 169.212   1
   1   6  27 296.897 164.561   2
   1   6  27 62.0500 123.201   1
   1   7 -19 2961.65 368.850   2
   1   7 -18 288.001 167.152   2
   1   7 -18 85.9919 142.918   3
   1   7 -17 502.903 185.384   2
  -1  -7  17 442.894 192.674   1
   1   7 -17 529.995 180.065   3
  -1  -7  16 272.992 162.185   1
   1   7 -16 18.2898 120.914   3
   1   7 -16 122.593 119.950   2
  -1  -7  15-24.6603 139.149   1
   1   7 -15 74.2585 137.844   2
   1   7 -15-36.2344 117.035   3
  -1  -7  14-37.5764 113.635   1
   1   7 -14 26.2906 114.463   2
   1   7 -14 23.2359 102.002   3
   1   7 -13-123.728 120.390   3
  -1  -7  13-12.9415 99.1594   1
   1   7 -13-96.4909 126.895   2
  -1  -7  12-81.0097 115.671   1
   1   7 -12 110.873 94.6417   3
   1   7 -12 107.974 121.871   2
  -1  -7  11 87.6243 97.0189   1
   1   7 -11-62.0892 106.937   2
   1   7 -11 46.0288 87.3623   3
  -1  -7  10 663.508 133.965   4
   1   7 -10 852.759 189.706   2
   1   7 -10 618.511 153.647   3
  -1  -7  10 713.747 176.948   1
   1   7  -9 414.576 145.778   2
  -1  -7   9 251.300 95.8165   4
   1   7  -9 332.860 120.944   3
  -1  -7   9 277.215 125.261   1
  -1  -7   8 191.624 105.442   1
  -1  -7   8 154.766 88.8535   4
   1   7  -8 18.6792 80.9100   3
   1   7  -8 180.408 132.974   2
   1   7  -7 2022.28 267.729   2
  -1  -7   7 2003.46 259.509   1
   1   7  -7 2075.11 235.565   3
  -1  -7   7 1679.43 193.118   4
  -1  -7   6 263.325 103.685   1
   1   7  -6 127.974 86.0722   3
   1   7  -6 404.847 140.759   2
  -1  -7   6 336.263 111.011   4
   1   7  -5 279.471 130.521   2
  -1  -7   5 325.851 122.529   1
  -1  -7   5 158.134 86.8341   4
   1   7  -5 318.729 108.423   3
   1   7  -4 125.401 90.5652   2
  -1  -7   4 146.629 99.2612   4
   1   7  -4 43.4609 68.6281   3
  -1  -7   4 332.535 112.084   1
  -1  -7   3 0.66744 67.5585   4
   1   7  -3-61.3487 79.3806   2
  -1  -7   3 180.544 108.497   1
   1   7  -3 157.151 72.8325   3
   1   7  -2 5.12778 85.1677   2
  -1  -7   2 25.8542 67.3906   4
   1   7  -2 71.2387 74.4271   3
  -1  -7   2-155.290 103.100   1
   1   7  -1 313.206 128.106   2
   1   7  -1 495.731 117.074   3
  -1  -7   1 252.110 84.9043   4
  -1  -7   1 350.986 122.719   1
  -1  -7   0 5193.62 368.825   1
   1   7   0 4605.15 263.934   3
   1   7   0 4144.66 352.921   2
  -1  -7   0 4221.51 312.544   4
  -1  -7  -1 98.6144 76.1121   4
   1   7   1-1.48204 80.3949   2
  -1  -7  -1 7.57675 72.7784   1
   1   7   1 139.483 72.5386   3
   1   7   2 336.251 125.730   2
  -1  -7  -2 326.804 104.567   1
   1   7   2 553.485 97.5376   3
  -1  -7  -2 344.632 101.797   4
  -1  -7  -3 1572.18 210.401   4
  -1  -7  -3 1970.32 224.964   1
   1   7   3 1716.16 154.751   3
   1   7   3 1768.59 243.408   2
  -1  -7  -4 118.588 115.287   4
   1   7   4 71.2315 80.4697   2
   1   7   4 212.249 71.9066   3
  -1  -7  -4 115.332 73.4156   1
  -1  -7  -5 436.508 132.725   4
  -1  -7  -5 477.323 124.528   1
   1   7   5 604.556 97.4976   3
   1   7   5 669.277 167.931   2
  -1  -7  -6-7.03694 97.2427   4
   1   7   6 48.5625 90.0318   2
  -1  -7  -6 257.343 95.0837   1
   1   7   7 79.9152 106.914   2
  -1  -7  -7-21.5621 63.2678   1
  -1  -7  -7 35.4903 51.2746   3
  -1  -7  -7 104.052 96.5774   4
  -1  -7  -8 49.9207 92.5709   1
  -1  -7  -8-4.29204 95.3856   4
  -1  -7  -8 17.3875 52.0960   3
   1   7   8 186.693 126.568   2
   1   7   9 9002.30 509.726   2
  -1  -7  -9 8263.86 314.552   3
   1   7   9 8365.83 475.537   1
  -1  -7  -9 7909.70 475.817   4
   1   7  10 398.526 114.732   1
   1   7  10 336.003 120.908   2
  -1  -7 -10 417.094 86.0283   3
  -1  -7 -10 400.497 148.635   4
   1   7  11 207.578 100.157   1
  -1  -7 -11 422.060 144.474   4
   1   7  11 403.731 133.357   2
  -1  -7 -11 138.008 62.3691   3
  -1  -7 -12 1934.47 162.254   3
   1   7  12 2044.26 244.928   1
   1   7  12 2245.77 267.909   2
  -1  -7 -12 1787.69 251.889   4
   1   7  13 8926.50 525.877   2
  -1  -7 -13 7593.46 492.395   4
   1   7  13 8626.25 493.911   1
   1   7  14 1504.83 219.479   1
  -1  -7 -14 1621.96 249.611   4
   1   7  14 1268.98 206.828   2
   1   7  15 443.463 140.175   1
  -1  -7 -15 146.769 121.936   4
   1   7  15 498.472 146.857   2
  -1  -7 -16-19.4579 103.623   4
   1   7  16 95.3395 99.8797   1
   1   7  16-10.4401 112.735   2
  -1  -7 -17 77.1888 125.665   4
   1   7  17 196.246 119.367   2
   1   7  17-83.4822 109.360   1
  -1  -7 -18 81.5443 97.6467   4
   1   7  18-83.7591 106.622   2
   1   7  18 54.9450 91.7783   1
  -1  -7 -19 1710.45 286.050   4
   1   7  19 1482.40 244.811   2
   1   7  19 1036.72 205.672   1
   1   7  20-36.2113 101.715   2
  -1  -7 -20 225.915 158.540   4
   1   7  20 43.0145 119.460   1
  -1  -7 -21-228.872 156.983   4
   1   7  21 57.2163 107.201   2
  -1  -7 -22 266.007 167.193   4
   1   7  22 666.338 189.183   1
   1   7  22 581.495 184.561   2
  -1  -7 -23 311.935 155.764   4
   1   7  23 117.674 118.629   2
   1   7  24 298.958 146.928   1
   1   7  24-131.118 128.574   2
   1   7  25-92.2849 148.870   2
   1   7  25 294.975 173.038   1
   1   8 -17-3.83092 138.937   2
   1   8 -16 1935.36 313.365   3
   1   8 -16 2304.59 349.145   2
   1   8 -15 250.839 161.662   2
   1   8 -15 406.130 177.845   3
   1   8 -14 137.956 152.507   2
   1   8 -14-40.0199 112.639   3
  -1  -8  14 186.651 176.130   1
   1   8 -13 2069.67 322.077   2
   1   8 -13 1714.04 272.875   3
  -1  -8  13 2332.66 334.538   1
   1   8 -12 360.007 165.072   2
  -1  -8  12 172.221 114.256   1
   1   8 -12 275.492 138.741   3
  -1  -8  11 895.423 218.824   1
   1   8 -11 1183.52 215.752   3
   1   8 -11 1052.56 229.924   2
   1   8 -10 772.636 205.699   2
  -1  -8  10 751.874 195.128   1
   1   8 -10 866.064 188.319   3
  -1  -8   9 1013.87 200.724   1
   1   8  -9 790.095 199.980   2
   1   8  -9 1121.24 196.103   3
  -1  -8   8 711.209 149.961   4
  -1  -8   8 306.306 127.937   1
   1   8  -8 758.165 168.234   3
   1   8  -8 809.792 195.292   2
   1   8  -7 82.2418 96.8152   3
   1   8  -7-84.7288 117.965   2
  -1  -8   7 3.54057 75.7866   4
   1   8  -6 1265.91 229.826   2
  -1  -8   6 1011.77 173.719   4
   1   8  -6 1314.51 200.121   3
  -1  -8   6 1126.58 212.686   1
   1   8  -5 416.974 152.155   2
   1   8  -5 281.979 110.350   3
  -1  -8   5 136.152 97.1610   4
  -1  -8   5 288.081 135.829   1
   1   8  -4 3906.86 310.695   3
  -1  -8   4 4544.08 345.198   4
  -1  -8   4 4503.67 393.845   1
   1   8  -4 4555.92 415.953   2
  -1  -8   3-84.5695 84.1640   4
   1   8  -3 152.670 111.425   2
  -1  -8   3-35.4012 101.634   1
   1   8  -3 67.2898 81.1114   3
   1   8  -2 47.6921 110.582   2
   1   8  -2-1.63655 71.7635   3
  -1  -8   2 155.410 102.953   4
  -1  -8   2 269.910 134.526   1
   1   8  -1 1120.36 217.653   2
   1   8  -1 1245.49 162.392   3
  -1  -8   1 1311.23 209.780   4
  -1  -8   1 730.617 173.244   1
   1   8   0 1345.09 229.842   2
  -1  -8   0 1442.05 221.328   1
  -1  -8   0 981.839 179.573   4
   1   8   0 1562.83 175.847   3
  -1  -8  -1 253.385 108.153   4
  -1  -8  -1 240.498 105.445   1
   1   8   1 75.7474 69.1393   3
   1   8   1 120.491 108.401   2
   1   8   2 619.717 175.983   2
   1   8   2 592.985 118.251   3
  -1  -8  -2 466.140 145.314   1
  -1  -8  -2 390.918 117.647   4
   1   8   3 2311.62 194.057   3
  -1  -8  -3 2326.39 262.021   1
   1   8   3 2278.39 291.797   2
   1   8   4-41.0222 103.034   2
   1   8   4 11.3101 54.9371   3
  -1  -8  -4-82.6725 86.6332   4
  -1  -8  -4 185.421 102.261   1
  -1  -8  -5 1183.93 199.315   1
   1   8   5 1288.94 224.813   2
  -1  -8  -5 1071.86 198.676   4
   1   8   6 2096.31 279.291   2
  -1  -8  -6 1989.33 243.084   1
   1   8   7 23.6860 111.258   2
  -1  -8  -7-1.73948 85.4505   1
  -1  -8  -7 119.808 122.503   4
  -1  -8  -8 409.968 146.350   4
   1   8   8 529.204 161.832   2
  -1  -8  -8 755.645 170.879   1
   1   8   9 1122.25 220.985   2
  -1  -8  -9 1208.27 225.955   4
   1   8  10 308.791 126.200   2
   1   8  10 505.499 153.773   1
  -1  -8 -10 335.394 138.800   4
  -1  -8 -11 923.679 194.580   4
   1   8  11 1117.80 199.518   1
   1   8  11 1157.46 216.574   2
  -1  -8 -12-17.9993 99.8984   4
   1   8  12-98.0919 102.015   1
   1   8  13 420.924 154.646   2
  -1  -8 -13 500.921 165.727   4
   1   8  13 760.208 185.324   1
  -1  -8 -14 477.937 145.905   4
   1   8  14 443.654 155.622   1
   1   8  14 397.396 160.517   2
  -1  -8 -15 485.796 178.733   4
   1   8  15 533.625 167.177   2
   1   8  15 346.671 130.989   1
  -1  -8 -16 159.439 123.207   4
   1   8  16-119.620 150.841   2
   1   8  16 87.5084 92.8799   1
  -1  -8 -17 22.6068 119.539   4
   1   8  17-16.9605 97.0424   1
   1   8  17-81.7358 119.047   2
  -1  -8 -18 296.970 137.689   4
   1   8  18 442.337 199.082   2
   1   8  18 198.335 138.258   1
  -1  -8 -19 85.3345 165.755   4
   1   8  19-249.811 158.079   1
   1   8  19-91.5415 147.118   2
  -1  -8 -20-264.166 151.684   4
   1   8  20 65.0938 128.781   2
   1   8  20 90.0447 124.910   1
  -1  -8 -21-45.2526 143.705   4
   1   8  21 58.0936 137.493   1
   1   8  21-3.57984 129.957   2
   1   8  22-35.6148 124.155   1
   1   8  22-96.2918 148.487   2
   1   9 -13 88.6818 131.192   2
   1   9 -12-170.647 162.058   2
   1   9 -11 296.153 167.737   2
  -1  -9  11-34.9653 142.133   1
   1   9 -10 165.258 130.120   2
  -1  -9  10 251.511 150.611   1
   1   9  -9 178.510 156.239   2
  -1  -9   9 81.3142 138.638   1
   1   9  -8 2178.11 329.095   2
  -1  -9   8 2187.33 317.273   1
   1   9  -7 222.473 155.775   2
  -1  -9   7 165.077 139.158   1
   1   9  -6 170.578 139.137   2
  -1  -9   6-54.4515 120.651   1
  -1  -9   5 84.8671 102.189   1
   1   9  -5 25.7922 129.324   2
  -1  -9   5 45.4781 101.920   4
  -1  -9   4 48.5688 88.2941   4
   1   9  -4 3.41190 110.353   2
  -1  -9   4 72.9531 106.703   1
  -1  -9   3 169.450 122.497   4
   1   9  -3-21.6107 128.011   2
  -1  -9   3 155.757 129.946   1
  -1  -9   2 54.6339 93.8420   4
   1   9  -2 36.1044 127.023   2
  -1  -9   2-19.2306 107.146   1
  -1  -9   1 3704.91 345.207   4
  -1  -9   1 4123.78 389.352   1
   1   9  -1 4776.16 441.063   2
  -1  -9   0-94.9692 111.944   1
  -1  -9   0 170.658 110.846   4
   1   9   0 185.558 156.252   2
   1   9   1 782.537 192.054   2
  -1  -9  -1 549.528 163.565   1
  -1  -9  -1 775.671 178.784   4
  -1  -9  -2-23.2137 91.6986   4
  -1  -9  -2 143.638 103.769   1
   1   9   2 282.510 150.610   2
   1   9   3-16.6668 127.788   2
  -1  -9  -3 266.583 115.459   4
  -1  -9  -3-102.394 121.979   1
  -1  -9  -4 95.5813 97.6017   1
  -1  -9  -4 63.0651 103.757   4
   1   9   4 147.724 119.586   2
  -1  -9  -5 107.152 116.479   4
   1   9   5 86.6050 112.959   2
  -1  -9  -5 160.634 99.4308   1
   1   9   6 585.677 186.281   2
  -1  -9  -6 641.906 188.391   4
  -1  -9  -6 653.522 166.429   1
   1   9   7-6.46509 117.497   2
  -1  -9  -7 117.402 89.3384   1
  -1  -9  -7 1.12598 108.389   4
  -1  -9  -8 3935.08 366.316   1
   1   9   8 4103.88 411.293   2
  -1  -9  -8 3587.22 380.257   4
   1   9   9 2778.14 340.533   2
   1   9   9 2556.21 308.823   1
  -1  -9  -9 3201.48 358.567   4
   1   9  10 1114.21 215.747   1
  -1  -9 -10 1277.63 241.278   4
   1   9  10 1337.72 261.906   2
   1   9  11 2645.03 317.023   1
   1   9  11 2926.12 350.964   2
  -1  -9 -11 2496.74 328.790   4
   1   9  12 4799.20 419.310   1
   1   9  12 4549.33 439.075   2
  -1  -9 -12 3530.25 388.593   4
  -1  -9 -13 884.874 221.026   4
   1   9  13 950.412 206.267   1
   1   9  13 834.320 226.938   2
  -1  -9 -14 361.476 174.121   4
   1   9  14 700.355 174.799   1
   1   9  14 1011.15 251.825   2
   1   9  15 561.203 163.453   1
   1   9  15 473.564 194.474   2
  -1  -9 -15 524.820 204.305   4
   1   9  16 381.922 149.153   1
   1   9  16 375.295 184.378   2
  -1  -9 -16 466.065 207.706   4
   1   9  17 175.298 176.532   2
  -1  -9 -17-29.5870 124.035   4
   1   9  17 54.4767 127.788   1
   1   9  18 1305.06 256.346   2
   1   9  18 1433.17 256.939   1
   1  10  -6-26.7287 151.393   2
  -1 -10   6-78.2883 157.842   1
  -1 -10   5 2829.72 374.012   1
   1  10  -5 2996.19 400.966   2
  -1 -10   4 257.015 163.880   1
   1  10  -4 78.4989 124.153   2
  -1 -10   3-85.0501 131.845   4
  -1 -10   3 3.52127 120.903   1
   1  10  -3 118.171 158.911   2
  -1 -10   2-55.6007 108.630   1
   1  10  -2-128.962 153.769   2
   1  10  -1 222.193 157.366   2
  -1 -10   1 291.298 143.318   4
  -1 -10   1 2.93643 139.696   1
  -1 -10   0 290.846 155.851   4
  -1 -10   0 252.597 163.026   1
   1  10   0 57.2862 163.209   2
  -1 -10  -1 608.599 188.668   4
   1  10   1 1052.79 243.191   2
  -1 -10  -1 767.762 204.334   1
  -1 -10  -2 2183.25 303.718   1
  -1 -10  -2 2004.51 301.962   4
   1  10   2 2224.02 343.472   2
  -1 -10  -3 204.447 152.869   4
   1  10   3 292.515 166.791   2
  -1 -10  -3 305.548 141.273   1
  -1 -10  -4 159.886 139.432   4
   1  10   4 272.189 165.490   2
  -1 -10  -4 500.889 180.062   1
  -1 -10  -5 29.0916 125.008   4
   1  10   5 175.364 163.425   2
  -1 -10  -5 223.586 126.812   1
  -1 -10  -6-2.11432 125.592   4
  -1 -10  -6 34.5462 118.316   1
   1  10   6 89.8471 134.040   2
  -1 -10  -7 537.865 197.668   4
   1  10   7 934.574 230.369   2
  -1 -10  -7 1074.59 229.989   1
   1  10   8 107.384 139.062   2
  -1 -10  -8 116.999 121.582   1
  -1 -10  -8-89.6749 136.998   4
   1  10   9 807.382 203.724   1
  -1 -10  -9 379.358 173.451   4
   1  10   9 582.911 206.747   2
   1  10  10 182.018 149.687   2
  -1 -10 -10 23.1919 120.054   4
   1  10  10 123.196 128.908   1
   1  10  11 1086.18 231.679   1
  -1 -10 -11 816.037 228.558   4
   1  10  11 1160.55 261.907   2
  -1 -10 -12 148.793 133.124   4
   1  10  12 578.778 211.748   2
   1  10  12 685.231 208.426   1
  -1 -10 -13 78.7750 143.513   4
   1  10  13 202.407 141.180   1
  -1 -11  -1 555.864 192.613   1
  -1 -11  -2 98.1004 139.990   1
  -1 -11  -3 95.1537 140.706   4
  -1 -11  -4 266.512 180.233   4
  -1 -11  -5 259.183 150.595   1
  -1 -11  -6 359.470 184.143   1
  -1 -11  -7 197.839 129.633   1
  -2  10  10-90.9295 133.775   2
   2 -10  -9 202.285 153.696   3
  -2  10   9-79.2258 170.265   2
  -2  10   8 184.868 167.884   2
   2 -10  -8 73.7008 120.447   4
  -2  10   7 70.6187 131.792   2
   2 -10  -7 34.8457 126.180   4
   2 -10  -6 115.333 130.112   4
  -2  10   6 154.146 139.829   3
  -2  10   6-126.495 163.095   2
  -2  10   5 1664.09 292.181   2
   2 -10  -5 1864.49 307.281   4
  -2  10   5 1546.19 257.994   3
  -2  10   4-149.461 159.888   2
  -2  10   4-181.666 143.822   3
  -2  10   3 267.781 150.871   2
   2 -10  -3 234.676 160.878   4
  -2  10   3 109.243 107.392   3
   2 -10  -2 301.138 167.430   4
  -2  10   2 309.950 154.963   2
  -2  10   2 127.126 120.777   3
   2 -10  -1 892.645 242.545   4
  -2  10   1 1104.78 253.865   2
  -2  10   1 1014.97 221.800   3
  -2  10   0 800.855 215.440   2
  -2  10   0 309.286 144.878   3
   2 -10   0 582.282 225.276   4
   2 -10   1 731.467 222.880   4
  -2  10  -1 1113.88 255.291   2
  -2  10  -1 682.262 211.190   3
  -2  10  -2 2336.55 322.242   3
  -2  10  -2 2398.00 335.572   2
   2 -10   2 1979.53 322.442   4
   2 -10   3 51.2376 153.433   4
  -2  10  -3 84.8677 146.028   2
  -2  10  -3-22.1019 122.867   3
   2 -10   4-118.623 147.387   4
  -2  10  -4 200.912 174.326   2
  -2  10  -4 87.1973 145.108   3
   2 -10   5 356.419 171.441   4
  -2  10  -5-31.6141 132.099   2
  -2  10  -5 129.160 145.611   3
   2 -10   6 611.702 197.778   4
  -2  10  -6 788.268 213.556   3
   2  -9 -17-90.0470 136.672   3
   2  -9 -16 115.937 152.869   3
   2  -9 -16 108.384 149.955   4
   2  -9 -15 1493.73 257.256   3
  -2   9  15 1661.49 302.031   2
   2  -9 -15 1229.42 262.889   4
   2  -9 -14 924.453 229.487   4
   2  -9 -14 635.378 179.188   3
  -2   9  14 595.202 216.734   2
   2  -9 -13 247.706 152.674   4
   2  -9 -13 306.074 165.505   3
  -2   9  13-7.99222 116.724   2
   2  -9 -12 605.849 191.573   4
  -2   9  12 198.651 164.119   2
   2  -9 -12 129.469 135.727   3
   2  -9 -11 839.550 226.673   4
   2  -9 -11 1417.52 241.339   3
  -2   9  11 1353.24 267.460   2
   2  -9 -10 187.908 127.616   3
  -2   9  10 123.899 155.521   2
   2  -9 -10-47.1782 125.177   4
   2  -9  -9-5.95331 116.493   4
  -2   9   9 175.732 144.951   2
   2  -9  -8 1106.89 239.233   4
  -2   9   8 1491.77 240.326   3
  -2   9   8 1302.48 249.175   2
  -2   9   7-131.417 141.581   2
   2  -9  -7-199.310 135.392   4
  -2   9   7-134.273 127.225   3
   2  -9  -6 171.345 129.923   4
  -2   9   6 366.811 173.903   2
  -2   9   6 84.8372 103.713   3
  -2   9   5 165.537 117.469   3
  -2   9   5-195.460 128.309   2
   2  -9  -5-8.14350 109.783   4
   2  -9  -4 322.925 148.543   4
  -2   9   4 563.470 173.693   2
  -2   9   4 485.015 138.283   3
   2  -9  -3 261.375 116.965   4
  -2   9   3 203.744 123.646   2
  -2   9   2 3109.09 351.247   2
   2  -9  -2 3204.52 361.005   4
  -2   9   2 3192.02 332.846   3
  -2   9   1 30.0979 101.939   2
  -2   9   1 130.062 100.952   3
   2  -9   0 126.947 114.734   4
  -2   9   0 186.317 106.981   3
  -2   9   0 299.868 135.383   2
  -2   9  -1 764.914 198.078   2
  -2   9  -1 604.771 175.116   3
   2  -9   1 315.916 131.831   4
  -2   9  -2-24.9883 104.414   2
  -2   9  -2-171.902 116.812   3
   2  -9   2 215.841 166.464   4
  -2   9  -3-118.277 131.642   2
   2  -9   3-46.3252 131.517   4
  -2   9  -3-50.5486 104.433   3
  -2   9  -4 944.881 209.674   2
   2  -9   4 1051.23 199.537   1
  -2   9  -4 1009.79 208.621   3
   2  -9   4 659.075 199.486   4
  -2   9  -5 281.494 150.611   2
  -2   9  -5-13.6145 101.601   3
   2  -9   5 78.2123 104.685   1
   2  -9   5 120.650 132.563   4
   2  -9   6 183.495 132.663   4
   2  -9   6 192.512 115.468   1
  -2   9  -6 150.199 131.430   2
  -2   9  -6 285.659 162.070   3
   2  -9   7 324.686 139.229   1
  -2   9  -7 378.877 145.400   2
   2  -9   7 209.218 122.556   4
  -2   9  -7 480.665 173.075   3
   2  -9   8 350.482 183.979   4
   2  -9   8 874.386 199.806   1
  -2   9  -8 728.535 221.521   3
   2  -9   9 695.436 194.620   4
  -2   9  -9 449.098 187.864   3
   2  -9  10 626.639 210.254   4
   2  -9  10 765.885 206.725   1
  -2   9 -10 511.523 184.432   3
   2  -9  11 728.286 211.462   4
   2  -9  11 951.206 214.585   1
  -2   9 -11 596.844 213.625   3
   2  -9  12 58.8063 129.846   1
   2  -9  12 265.597 174.108   4
   2  -9  13 87.5903 128.515   1
   2  -8 -21 146.455 160.960   3
   2  -8 -20-39.3387 138.811   4
   2  -8 -20 28.7638 119.861   3
   2  -8 -19-3.11589 152.099   3
  -2   8  19 356.608 180.464   2
   2  -8 -19 418.611 173.294   4
   2  -8 -18-19.4532 118.213   4
   2  -8 -18 12.0430 124.551   3
  -2   8  18-147.291 157.492   2
   2  -8 -17 319.624 153.703   3
  -2   8  17 543.138 179.966   2
   2  -8 -17 321.584 156.815   4
  -2   8  16 625.454 184.747   2
   2  -8 -16 746.597 188.894   3
   2  -8 -16 409.968 167.920   4
  -2   8  15 6224.06 517.010   2
   2  -8 -15 5974.09 453.106   3
   2  -8 -15 5838.60 481.912   4
   2  -8 -14 418.988 162.588   3
  -2   8  14-54.3361 138.488   2
   2  -8 -14 111.705 130.844   4
   2  -8 -13 1.15506 103.920   4
  -2   8  13-18.3202 102.451   2
   2  -8 -13 148.038 109.798   3
  -2   8  12 1496.57 251.111   2
   2  -8 -12 1725.67 268.752   4
   2  -8 -12 1409.65 225.441   3
   2  -8 -11 83.0765 104.334   4
   2  -8 -11 202.928 135.266   3
  -2   8  11 130.951 101.370   2
   2  -8 -10 1218.73 220.226   3
  -2   8  10 1420.14 248.265   2
   2  -8 -10 1475.98 238.474   4
   2  -8  -9 76.4341 111.631   4
  -2   8   9 119.658 109.174   2
   2  -8  -8 218.132 125.269   4
  -2   8   8 480.665 159.164   2
  -2   8   8 425.649 127.319   3
   2  -8  -7 603.372 169.890   4
  -2   8   7 532.213 170.147   2
  -2   8   7 673.554 150.919   3
  -2   8   6 3033.13 295.009   3
   2  -8  -6 2216.32 281.376   4
  -2   8   6 3261.16 345.713   2
   2  -8  -5 424.464 155.893   4
  -2   8   5 525.139 169.351   2
  -2   8   5 384.613 122.511   3
   2  -8  -4 167.782 91.0810   4
  -2   8   4 230.510 115.769   2
  -2   8   4 208.370 94.1504   3
  -2   8   3 1831.00 266.106   2
   2  -8  -3 2213.87 211.542   1
  -2   8   3 2099.35 254.004   3
   2  -8  -3 1822.44 255.991   4
   2  -8  -2 652.446 172.736   4
  -2   8   2 594.935 156.160   2
  -2   8   2 835.052 177.273   3
   2  -8  -1 355.919 147.606   4
   2  -8  -1 434.495 108.269   1
  -2   8   1 624.073 172.517   2
  -2   8   1 579.909 162.331   3
   2  -8   0 1566.57 249.979   4
   2  -8   0 2040.91 215.134   1
  -2   8   0 1964.45 253.055   3
  -2   8   0 1966.99 253.955   2
   2  -8   1-9.86363 87.7157   4
  -2   8  -1-116.661 100.023   2
  -2   8  -1 122.490 98.7437   3
   2  -8   1 128.967 94.2111   1
  -2   8  -2 1193.22 209.743   2
   2  -8   2 1039.45 167.171   1
   2  -8   2 837.615 201.917   4
  -2   8  -2 1047.82 193.682   3
  -2   8  -3 1745.76 237.854   2
   2  -8   3 1737.40 261.248   4
  -2   8  -3 1949.97 261.963   3
   2  -8   3 2493.45 257.412   1
  -2   8  -4 4972.71 387.602   2
   2  -8   4 4188.73 334.504   1
  -2   8  -4 4617.12 400.492   3
   2  -8   4 4397.23 400.260   4
   2  -8   5 857.100 156.497   1
  -2   8  -5 578.217 147.894   2
  -2   8  -5 825.619 176.420   3
   2  -8   5 776.649 192.292   4
  -2   8  -6 123.291 114.288   2
  -2   8  -6 132.198 126.639   3
   2  -8   6 8.08797 99.3604   4
   2  -8   6 79.1796 102.335   1
  -2   8  -7 6483.58 486.243   3
   2  -8   7 5716.13 458.832   4
   2  -8   7 5949.51 419.290   1
  -2   8  -7 6030.31 429.310   2
   2  -8   8 92.0719 102.901   1
   2  -8   8 298.469 143.317   4
  -2   8  -8 91.2409 102.715   2
  -2   8  -8 31.5511 111.388   3
   2  -8   9 244.709 128.324   4
   2  -8   9 366.852 143.202   1
  -2   8  -9 202.863 119.055   2
  -2   8  -9 178.040 150.939   3
   2  -8  10 292.212 134.594   1
   2  -8  10 545.722 189.657   4
  -2   8 -10 438.918 169.161   3
   2  -8  11-145.133 115.323   4
   2  -8  11-12.9260 95.2956   1
  -2   8 -11 70.9199 135.674   3
   2  -8  12 52.9124 112.373   1
  -2   8 -12-156.698 155.590   3
   2  -8  12-24.2809 133.088   4
   2  -8  13 364.654 162.411   4
   2  -8  13 512.591 175.914   1
  -2   8 -13 211.841 143.819   3
   2  -8  14 218.072 149.672   1
  -2   8 -14 214.637 172.760   3
   2  -8  14 20.8918 124.820   4
   2  -8  15-146.852 141.793   1
   2  -8  15-17.8754 147.497   4
   2  -7 -24 292.292 174.056   4
   2  -7 -24 152.293 135.142   3
   2  -7 -23 287.649 162.840   4
   2  -7 -23 701.414 209.044   3
   2  -7 -22 303.916 173.826   3
  -2   7  22 291.358 176.874   2
   2  -7 -22 105.394 125.903   4
   2  -7 -21 145.597 143.390   4
   2  -7 -21 48.9454 124.873   3
  -2   7  21 75.0730 146.650   2
   2  -7 -20 234.929 140.621   4
   2  -7 -20 192.745 122.093   3
  -2   7  20 177.542 154.695   2
   2  -7 -19 99.4724 105.127   4
   2  -7 -19-25.8034 104.994   3
   2  -7 -18 111.773 97.5247   4
   2  -7 -18 167.691 112.708   3
  -2   7  18 274.136 170.087   2
   2  -7 -17-236.520 138.855   4
  -2   7  17-80.8106 156.599   2
  -2   7  16 2761.04 343.740   2
   2  -7 -16 2145.71 272.499   3
   2  -7 -16 2200.99 288.836   4
   2  -7 -15 1190.52 225.430   4
  -2   7  15 1243.14 241.786   2
   2  -7 -15 1439.60 237.833   3
   2  -7 -14 559.386 168.438   3
   2  -7 -14 708.230 182.683   4
  -2   7  14 1063.82 212.405   2
   2  -7 -13 1123.74 204.924   4
  -2   7  13 1479.15 248.290   2
   2  -7 -13 901.534 176.604   3
  -2   7  12 4095.87 376.193   2
   2  -7 -12 3805.38 336.099   3
   2  -7 -12 3505.53 344.787   4
   2  -7 -11-44.4968 107.233   3
  -2   7  11 148.761 122.997   2
   2  -7 -11-44.7823 92.2320   4
   2  -7 -10 829.813 172.942   3
  -2   7  10 907.707 194.435   2
   2  -7 -10 1267.24 214.133   4
   2  -7  -9 76.5296 97.0649   4
  -2   7   9 340.207 138.835   2
   2  -7  -8 391.435 121.284   4
  -2   7   8 430.344 84.3604   1
  -2   7   8 429.883 142.261   2
  -2   7   7 1416.29 146.283   1
  -2   7   7 1528.84 228.570   2
  -2   7   7 1906.56 227.718   3
   2  -7  -7 1673.12 232.271   4
   2  -7  -6 217.072 120.890   4
  -2   7   6 327.557 125.518   2
   2  -7  -6 277.794 79.9313   1
  -2   7   6 339.745 110.482   3
  -2   7   5 371.642 118.661   2
   2  -7  -5 385.420 87.1495   1
   2  -7  -5 446.825 140.321   4
  -2   7   5 349.305 121.906   3
   2  -7  -4 722.386 153.385   4
  -2   7   4 1145.06 181.213   3
   2  -7  -4 749.605 122.779   1
  -2   7   4 942.537 179.265   2
   2  -7  -3 229.173 111.002   4
  -2   7   3 215.763 90.9780   2
   2  -7  -3 232.450 88.7081   1
  -2   7   3 161.160 96.2785   3
   2  -7  -2 1022.60 129.855   1
  -2   7   2 938.228 174.056   2
  -2   7   2 936.833 171.857   3
   2  -7  -2 587.682 135.030   4
   2  -7  -1 260.304 103.504   4
  -2   7   1 295.536 112.208   2
   2  -7  -1 363.512 93.3154   1
  -2   7   1 483.801 131.390   3
  -2   7   0 3072.66 286.381   2
   2  -7   0 2827.40 227.251   1
   2  -7   0 2772.95 295.006   4
  -2   7   0 3031.93 286.806   3
  -2   7  -1 53.0579 96.9088   2
   2  -7   1 125.290 113.146   4
   2  -7   1 123.818 69.0802   1
  -2   7  -1 188.287 93.3061   3
  -2   7  -2 149.234 92.0189   2
   2  -7   2 139.757 84.2289   1
   2  -7   2 133.781 99.1511   4
  -2   7  -2 106.285 89.3290   3
  -2   7  -3 1190.04 191.456   2
   2  -7   3 1137.45 192.774   4
   2  -7   3 1406.06 178.757   1
  -2   7  -3 1027.48 191.740   3
  -2   7  -4 1991.40 245.726   3
   2  -7   4 1877.01 205.996   1
   2  -7   4 1780.59 249.976   4
  -2   7  -4 1638.24 224.689   2
   2  -7   5 293.850 130.252   4
   2  -7   5 284.324 105.563   1
  -2   7  -5 51.3764 74.9148   2
   2  -7   6-72.9985 95.5605   4
   2  -7   6-13.9639 76.8626   1
  -2   7  -6 214.839 107.341   2
  -2   7  -6 260.437 122.272   3
  -2   7  -7 2996.25 322.848   3
   2  -7   7 2767.29 282.051   1
   2  -7   7 2466.86 286.395   4
  -2   7  -7 2446.81 257.384   2
   2  -7   8 185.072 102.680   1
  -2   7  -8 245.657 117.771   2
  -2   7  -8 264.837 137.774   3
   2  -7   8-83.5125 105.398   4
   2  -7   9 46.0453 93.1510   4
  -2   7  -9-4.18096 82.7366   2
   2  -7   9 2.92556 81.6039   1
  -2   7  -9-104.794 93.6976   3
  -2   7 -10 2170.18 291.448   3
   2  -7  10 1807.72 232.145   1
  -2   7 -10 1824.51 227.631   2
   2  -7  10 2241.43 283.829   4
   2  -7  11 258.941 135.100   1
  -2   7 -11 409.515 129.154   2
  -2   7 -11 123.006 105.159   3
   2  -7  11 219.916 128.641   4
   2  -7  12 904.763 199.669   4
  -2   7 -12 1000.68 207.331   3
   2  -7  12 948.789 202.791   1
   2  -7  13 605.556 178.726   4
  -2   7 -13 463.892 179.726   3
   2  -7  13 310.820 146.871   1
   2  -7  14 1073.06 223.154   4
  -2   7 -14 639.679 196.861   3
   2  -7  15 1538.44 271.149   1
  -2   7 -15 1118.45 237.473   3
   2  -7  15 1225.00 242.043   4
   2  -7  16 655.251 192.122   4
  -2   7 -16 506.324 202.231   3
   2  -7  16 366.277 150.441   1
  -2   7 -17 344.857 197.885   3
   2  -7  17 178.314 159.398   1
   2  -7  17 51.8033 115.290   4
   2  -7  18 208.061 149.129   1
   2  -6 -25-34.3019 121.500   4
   2  -6 -25 63.9594 145.458   3
   2  -6 -24 146.302 144.195   4
   2  -6 -24 176.214 144.915   3
  -2   6  24 18.4383 150.537   2
   2  -6 -23 793.313 204.528   4
   2  -6 -23 879.654 217.387   3
  -2   6  23 1177.65 261.745   2
   2  -6 -22 138.517 135.425   4
   2  -6 -22-1.96370 119.615   3
  -2   6  22 76.6898 143.300   2
   2  -6 -21 122.542 141.785   3
  -2   6  21 93.7123 135.003   2
   2  -6 -21 183.335 146.691   4
   2  -6 -20 53.5597 128.876   4
  -2   6  20 59.9447 110.020   2
   2  -6 -20-236.359 131.870   3
   2  -6 -19 715.093 192.140   4
   2  -6 -19 640.002 166.919   3
  -2   6  19 493.941 162.268   2
   2  -6 -18 268.927 133.984   4
  -2   6  18 175.954 132.562   2
   2  -6 -18 289.099 143.948   3
   2  -6 -17 672.155 174.050   3
  -2   6  17 553.319 150.561   2
   2  -6 -17 462.823 146.776   4
  -2   6  16 1449.84 238.686   2
   2  -6 -16 1912.11 250.864   3
   2  -6 -16 1457.95 220.383   4
   2  -6 -15 8.82099 95.8376   4
   2  -6 -15 22.9871 95.2322   3
  -2   6  15-58.2064 122.311   2
   2  -6 -14-10.8226 83.1798   4
   2  -6 -14-47.0233 85.8562   3
  -2   6  14 11.8043 96.3880   2
  -2   6  13 158.989 88.3695   2
   2  -6 -13 192.994 109.187   4
   2  -6 -12 485.717 136.999   4
   2  -6 -12 717.421 154.550   3
  -2   6  12 863.384 172.799   2
  -2   6  12 778.644 102.392   1
   2  -6 -11 1885.48 237.864   4
   2  -6 -11 1656.57 217.106   3
  -2   6  11 1837.95 241.594   2
  -2   6  11 1957.14 146.989   1
  -2   6  10 2386.19 160.958   1
   2  -6 -10 2351.25 254.920   3
  -2   6  10 2254.02 259.413   2
   2  -6 -10 2430.88 261.397   4
   2  -6  -9 1111.88 183.811   3
  -2   6   9 851.250 171.210   2
   2  -6  -9 1334.85 187.536   4
  -2   6   9 1083.41 111.415   1
  -2   6   8 1564.76 200.302   3
  -2   6   8 1732.03 222.131   2
  -2   6   8 1679.13 131.623   1
   2  -6  -8 1590.15 214.309   4
  -2   6   7 2362.26 234.990   3
   2  -6  -7 2406.05 252.658   4
  -2   6   7 2504.50 261.289   2
  -2   6   7 2089.04 148.085   1
  -2   6   6 2768.63 270.285   2
  -2   6   6 2591.21 239.906   3
   2  -6  -6 2812.66 274.419   4
   2  -6  -5 45.6848 76.9152   4
  -2   6   5 85.1116 96.9474   2
  -2   6   5 117.962 96.2177   3
   2  -6  -5-30.1962 43.9405   1
  -2   6   4 1539.64 129.633   1
  -2   6   4 1585.81 202.674   2
   2  -6  -4 1703.92 140.846   1
  -2   6   4 1342.96 175.026   3
   2  -6  -4 1410.34 195.862   4
   2  -6  -3 147.756 96.8326   4
   2  -6  -3-12.5901 49.1604   1
  -2   6   3-87.8535 87.9337   3
  -2   6   3 123.943 98.2876   2
   2  -6  -2 386.576 121.589   4
   2  -6  -2 400.977 83.3596   1
  -2   6   2 245.849 92.8032   2
  -2   6   2 418.778 118.018   3
  -2   6   1 4720.55 333.006   2
  -2   6   1 5167.87 346.626   3
   2  -6  -1 4582.37 342.908   4
   2  -6  -1 4924.41 253.474   1
  -2   6   0 4603.42 330.995   3
  -2   6   0 4674.02 320.901   2
   2  -6   0 4494.39 249.865   1
   2  -6   0 4651.41 349.033   4
  -2   6  -1 4178.44 318.006   3
  -2   6  -1 4241.86 306.246   2
   2  -6   1 4251.73 251.803   1
   2  -6   1 3347.79 300.885   4
  -2   6  -2 5642.90 374.655   3
   2  -6   2 5356.52 290.455   1
   2  -6   2 5370.66 375.688   4
  -2   6  -2 5435.90 345.826   2
  -2   6  -3 38304.9 894.794   2
   2  -6   3 38576.6 802.132   1
   2  -6   3 36977.1 969.679   4
   2  -6   4 3.75006 67.3479   1
   2  -6   4-8.84714 87.0157   4
  -2   6  -4-64.6430 82.1852   2
  -2   6  -4 13.0055 83.5106   3
   2  -6   5 1583.09 213.428   4
  -2   6  -5 1355.19 210.661   3
   2  -6   5 1368.01 167.703   1
  -2   6  -5 1500.60 187.146   2
   2  -6   6 3038.00 255.561   1
  -2   6  -6 3120.64 304.172   3
   2  -6   6 2630.26 273.327   4
  -2   6  -6 2891.29 252.802   2
  -2   6  -7 16.6071 76.5257   3
   2  -6   7 95.9352 90.0100   1
  -2   6  -7 23.4915 68.6017   2
   2  -6   7 88.3610 97.2493   4
  -2   6  -8 54.8120 67.7425   2
  -2   6  -8-0.91418 84.5951   3
   2  -6   8 20.0175 78.3198   1
   2  -6   8 119.349 95.1404   4
  -2   6  -9 379.844 113.661   2
   2  -6   9 601.152 145.062   1
  -2   6  -9 531.061 149.133   3
   2  -6   9 106.526 98.0398   4
   2  -6  10 408.823 130.433   4
   2  -6  10 236.725 114.297   1
  -2   6 -10 192.676 115.651   3
  -2   6 -10 217.375 80.4165   2
  -2   6 -11 215.872 102.903   2
   2  -6  11 107.157 96.8742   1
  -2   6 -11 95.5748 103.850   3
   2  -6  12 2498.28 281.436   1
   2  -6  12 2371.36 289.073   4
  -2   6 -12 2132.29 220.153   2
  -2   6 -12 2360.96 303.684   3
   2  -6  13 118.892 105.227   1
  -2   6 -13 28.3455 110.054   3
   2  -6  13 51.8216 90.3580   4
  -2   6 -13-62.8860 69.2919   2
   2  -6  14 264.006 123.976   1
   2  -6  14 39.3407 109.194   4
  -2   6 -14 108.130 106.144   3
   2  -6  15 21.5381 102.658   4
  -2   6 -15-44.8790 108.099   3
   2  -6  15 142.624 121.104   1
   2  -6  16 340.392 134.702   1
  -2   6 -16 519.545 190.825   3
   2  -6  16 175.078 121.555   4
   2  -6  17 266.137 146.655   1
  -2   6 -17 282.359 160.618   3
   2  -6  17 155.215 125.302   4
   2  -6  18-123.157 109.487   4
   2  -6  18-118.095 148.835   1
  -2   6 -18-31.6994 120.012   3
   2  -6  19 721.511 205.154   1
  -2   6 -19 878.322 242.409   3
   2  -6  19 389.698 163.509   4
   2  -6  20 252.672 177.144   1
   2  -5 -26-15.0247 153.247   3
   2  -5 -25 48.6252 130.138   3
  -2   5  25-95.9635 144.063   2
   2  -5 -24 255.289 148.683   3
   2  -5 -24 235.556 132.991   4
  -2   5  24 91.3125 123.966   2
   2  -5 -23 110.080 115.041   4
   2  -5 -23 129.958 130.719   3
  -2   5  23 169.697 146.525   2
   2  -5 -22 362.479 162.486   3
  -2   5  22 244.299 163.031   2
   2  -5 -22 86.0977 102.085   4
   2  -5 -21 412.332 138.372   4
   2  -5 -21 290.390 141.723   3
  -2   5  21 254.773 130.936   2
   2  -5 -20-14.0376 109.033   4
   2  -5 -20 259.285 141.201   3
  -2   5  20 397.152 158.686   2
   2  -5 -19 453.777 143.610   4
   2  -5 -19 24.9104 101.155   3
  -2   5  19 312.416 155.906   2
   2  -5 -18 233.606 120.742   4
   2  -5 -18 100.318 127.034   3
  -2   5  18 175.974 129.589   2
   2  -5 -17 347.318 121.993   3
  -2   5  17 607.481 159.913   2
   2  -5 -17 618.550 145.975   4
  -2   5  16 1854.54 266.552   2
  -2   5  16 1343.41 142.994   1
   2  -5 -16 1337.51 197.545   3
   2  -5 -16 1949.75 226.005   4
  -2   5  15 730.530 104.695   1
   2  -5 -15 975.265 175.786   3
  -2   5  15 806.599 187.237   2
   2  -5 -15 1157.30 183.549   4
  -2   5  14 819.768 106.434   1
   2  -5 -14 723.749 145.927   4
   2  -5 -14 870.449 182.436   3
  -2   5  14 762.864 162.066   2
  -2   5  13 3939.35 337.927   2
  -2   5  13 4182.40 210.325   1
   2  -5 -13 3498.72 293.328   4
   2  -5 -13 3692.26 312.958   3
  -2   5  12-16.7700 39.5768   1
   2  -5 -12 191.197 102.250   4
  -2   5  12 31.9473 79.0183   2
   2  -5 -12 39.0423 79.6673   3
  -2   5  11 3014.72 293.125   2
   2  -5 -11 3307.85 284.111   3
  -2   5  11 3403.52 176.004   1
   2  -5 -11 3243.65 276.644   4
   2  -5 -10 693.338 146.552   4
  -2   5  10 493.928 69.6139   1
   2  -5 -10 447.897 117.286   3
  -2   5  10 299.049 105.074   2
  -2   5  10 447.794 69.1068   1
   2  -5  -9 2343.35 239.835   3
  -2   5   9 1831.50 120.365   1
  -2   5   9 2101.37 128.611   1
  -2   5   9 1752.03 218.768   2
   2  -5  -9 2148.19 224.599   4
  -2   5   8 5178.44 350.203   2
  -2   5   8 4644.51 183.072   1
  -2   5   8 5355.51 334.861   3
   2  -5  -8 5003.88 330.029   4
  -2   5   8 4919.83 189.302   1
  -2   5   7 666.331 132.590   2
  -2   5   7 751.497 80.4096   1
  -2   5   7 669.742 71.5621   1
  -2   5   7 691.320 126.876   3
   2  -5  -7 714.876 144.823   4
   2  -5  -6 351.542 102.496   4
  -2   5   6 148.652 86.1502   2
  -2   5   6 343.150 60.2523   1
  -2   5   6 363.979 57.2570   1
  -2   5   6 222.064 95.6456   3
  -2   5   5 1293.74 178.045   2
  -2   5   5 1492.65 105.504   1
  -2   5   5 1237.14 163.864   3
   2  -5  -5 1361.45 102.369   1
   2  -5  -5 1141.71 164.335   4
   2  -5  -4 2935.62 253.716   4
  -2   5   4 2461.79 231.164   2
  -2   5   4 2916.18 237.393   3
   2  -5  -4 3328.90 161.584   1
  -2   5   4 3039.49 151.520   1
  -2   5   3 1426.98 177.935   2
  -2   5   3 1387.16 108.911   1
   2  -5  -3 1575.00 185.350   4
   2  -5  -3 1491.69 113.453   1
  -2   5   3 1568.68 186.844   3
   2  -5  -2 236.171 91.7703   4
  -2   5   2 435.064 111.250   2
  -2   5   2 277.850 101.167   3
   2  -5  -2 350.927 65.2868   1
  -2   5   2 237.828 59.4970   1
   2  -5  -1 8178.75 282.478   1
  -2   5   1 7910.88 378.221   2
  -2   5   1 7845.72 394.395   3
   2  -5  -1 7609.92 400.307   4
  -2   5   1 7428.85 265.379   1
  -2   5   0 152.653 81.3731   2
   2  -5   0 108.932 50.5591   1
  -2   5   0 51.2120 68.8219   3
  -2   5   0-13.0283 40.0908   1
   2  -5   0 18.9144 65.5335   4
  -2   5  -1 2394.85 214.385   2
   2  -5   1 2722.11 256.586   4
  -2   5  -1 2623.58 244.125   3
   2  -5   1 2575.60 179.368   1
  -2   5  -2 33839.4 752.599   2
  -2   5  -2 33180.8 823.854   3
   2  -5   2 32718.8 836.061   4
   2  -5   2 32742.6 644.012   1
   2  -5   3 13471.3 428.147   1
  -2   5  -3 13006.1 462.794   2
  -2   5  -3 13464.0 536.231   3
   2  -5   3 12026.0 514.086   4
  -2   5  -4 546.205 108.131   2
   2  -5   4 820.833 154.449   4
  -2   5  -4 513.452 115.717   3
   2  -5   4 502.028 92.6356   1
   2  -5   5 169.247 88.5548   4
  -2   5  -5 343.106 87.7389   2
   2  -5   5 261.752 80.0514   1
  -2   5  -5 120.524 79.2404   3
   2  -5   6 3354.83 246.904   1
   2  -5   6 2992.00 271.438   4
  -2   5  -6 3371.28 238.116   2
  -2   5  -7 133.524 65.8451   2
   2  -5   7 169.832 69.9070   1
  -2   5  -7 168.335 104.806   3
   2  -5   7 140.507 83.9722   4
   2  -5   8 3262.29 284.276   4
   2  -5   8 3020.55 254.599   1
  -2   5  -8 2619.55 267.359   3
  -2   5  -8 2727.68 218.682   2
  -2   5  -9 324.083 87.0393   2
   2  -5   9 385.345 108.980   1
  -2   5  -9 284.247 109.544   3
   2  -5   9 213.098 101.662   4
   2  -5  10 63.7752 78.1961   1
  -2   5 -10 74.5266 59.1926   2
  -2   5 -10 107.040 79.3547   3
   2  -5  10 212.057 107.785   4
   2  -5  11 560.037 124.956   1
  -2   5 -11 753.108 171.774   3
  -2   5 -11 712.490 124.961   2
   2  -5  11 697.130 145.171   4
   2  -5  12 1156.12 193.585   4
   2  -5  12 934.870 160.424   1
  -2   5 -12 1007.12 188.524   3
  -2   5 -12 975.005 137.138   2
  -2   5 -13 1201.66 155.411   2
   2  -5  13 1181.95 191.332   1
   2  -5  13 1476.37 216.547   4
  -2   5 -13 1050.81 197.725   3
  -2   5 -14 976.234 145.035   2
   2  -5  14 662.863 148.281   1
  -2   5 -14 677.364 176.952   3
   2  -5  14 1141.44 204.965   4
   2  -5  15 95.4169 109.423   1
  -2   5 -15-37.3128 100.066   3
   2  -5  15-122.774 111.757   4
   2  -5  16 1177.47 215.880   1
  -2   5 -16 1618.99 274.109   3
   2  -5  16 1512.57 235.821   4
  -2   5 -17 802.822 206.719   3
   2  -5  17 506.829 159.155   1
   2  -5  17 555.411 165.157   4
   2  -5  18 213.100 132.971   1
   2  -5  18 348.925 146.368   4
  -2   5 -19 203.782 166.650   3
   2  -5  19-148.054 125.208   4
   2  -5  19 45.1926 106.831   1
   2  -5  20-279.259 155.909   1
  -2   5 -20 148.352 131.078   3
   2  -5  20 127.332 138.648   4
   2  -5  21 188.847 151.357   1
  -2   5 -21 237.128 174.946   3
   2  -5  21-53.8585 115.079   4
   2  -5  22 563.011 204.789   1
  -2   4  26 1731.26 301.540   2
   2  -4 -26 1864.22 316.616   3
   2  -4 -25 558.671 208.424   3
  -2   4  25 592.482 214.078   2
   2  -4 -24 955.404 195.995   4
   2  -4 -24 1187.93 256.416   3
  -2   4  24 1082.37 237.396   2
   2  -4 -23 105.643 105.467   3
   2  -4 -23-48.8907 113.018   4
  -2   4  23 151.979 143.796   2
   2  -4 -22 71.5553 109.953   4
   2  -4 -22 178.809 141.493   3
  -2   4  22 347.987 163.116   2
   2  -4 -21 547.646 143.815   4
   2  -4 -21 799.894 204.863   3
  -2   4  21 609.312 185.925   2
   2  -4 -20 1278.64 191.367   4
  -2   4  20 1213.69 168.653   1
  -2   4  20 1623.60 253.369   2
   2  -4 -20 1308.11 221.990   3
   2  -4 -19 187.191 80.3147   4
   2  -4 -19 8.33072 93.9974   3
  -2   4  19 162.949 101.248   2
  -2   4  19 118.435 62.1902   1
   2  -4 -18 431.995 151.872   3
   2  -4 -18 742.883 152.080   4
  -2   4  18 504.635 146.447   2
  -2   4  18 616.613 117.438   1
  -2   4  17 2366.97 274.113   2
   2  -4 -17 2341.57 267.029   3
  -2   4  17 2621.15 204.185   1
   2  -4 -17 2865.90 259.522   4
   2  -4 -16 1077.21 179.025   3
  -2   4  16 875.321 178.146   2
  -2   4  16 941.183 129.808   1
   2  -4 -16 1068.75 162.302   4
  -2   4  15 1591.56 146.003   1
  -2   4  15 1666.61 220.048   2
   2  -4 -15 1664.35 208.559   3
   2  -4 -15 1773.97 197.625   4
  -2   4  14 11133.0 354.254   1
  -2   4  14 12087.2 557.006   2
   2  -4 -14 11308.3 481.262   4
   2  -4 -14 10839.6 515.614   3
   2  -4 -13 47.8235 89.4190   3
  -2   4  13 4.96309 41.4907   1
  -2   4  13 70.8266 95.0024   2
  -2   4  13 26.4778 48.9057   1
   2  -4 -13 27.7666 82.1161   4
   2  -4 -12 48.6051 66.7321   4
   2  -4 -12-10.9259 70.6684   3
  -2   4  12 90.7740 69.4486   2
  -2   4  12 53.5315 46.9800   1
  -2   4  12-64.3949 44.1785   1
  -2   4  11 10918.3 495.727   2
  -2   4  11 10875.7 290.546   1
  -2   4  11 10908.9 298.237   1
   2  -4 -11 10035.0 473.823   3
   2  -4 -11 11367.5 457.933   4
   2  -4 -10 512.270 105.619   4
  -2   4  10 344.307 56.8114   1
   2  -4 -10 567.498 136.306   3
  -2   4  10 320.828 96.8934   2
  -2   4  10 330.613 54.0209   1
   2  -4  -9 26.0008 67.8567   4
   2  -4  -9 118.005 64.3786   3
  -2   4   9 106.049 86.8154   2
  -2   4   9 26.5879 30.0087   1
  -2   4   9 20.8038 30.9803   1
   2  -4  -8 342.469 93.6631   3
  -2   4   8 432.551 52.3561   1
  -2   4   8 458.309 52.2470   1
  -2   4   8 315.365 88.7018   2
   2  -4  -8 499.011 107.060   4
  -2   4   7 893.807 142.702   2
  -2   4   7 744.166 60.1737   1
  -2   4   7 1066.52 146.549   3
   2  -4  -7 891.732 136.898   4
  -2   4   7 659.688 59.4455   1
  -2   4   6 475.878 106.097   2
  -2   4   6 352.537 42.6228   1
  -2   4   6 445.620 45.2669   1
   2  -4  -6 680.696 130.518   4
  -2   4   6 503.965 105.873   3
   2  -4  -5 1508.20 163.398   4
  -2   4   5 1390.66 160.279   2
  -2   4   5 1590.91 83.1463   1
  -2   4   5 1544.32 85.4933   1
  -2   4   5 1508.33 166.157   3
  -2   4   4 465.947 49.1041   1
   2  -4  -4 419.026 93.6858   4
  -2   4   4 428.815 95.3466   2
  -2   4   4 569.220 107.097   3
   2  -4  -4 529.216 54.1999   1
  -2   4   3 636.944 59.7441   1
   2  -4  -3 741.423 65.1824   1
   2  -4  -3 786.910 130.659   4
  -2   4   3 902.864 139.859   3
  -2   4   3 817.376 121.168   2
   2  -4  -2 6837.27 205.373   1
  -2   4   2 6789.31 322.578   2
  -2   4   2 6915.02 201.045   1
  -2   4   2 6548.12 332.769   3
   2  -4  -2 6542.68 332.922   4
  -2   4   1 1608.39 156.360   2
   2  -4  -1 1661.09 182.225   4
  -2   4   1 1662.47 177.277   3
  -2   4   1 1700.25 107.313   1
   2  -4  -1 1771.83 113.954   1
  -2   4   0 3597.10 224.437   2
  -2   4   0 3684.99 170.721   1
  -2   4   0 3587.24 253.333   3
   2  -4   0 3707.53 172.930   1
   2  -4   0 3276.16 245.751   4
  -2   4  -1 2858.06 202.124   2
   2  -4   1 2777.02 232.208   4
  -2   4  -1 2791.48 226.081   3
   2  -4   1 2878.02 161.827   1
  -2   4  -1 3143.02 169.795   1
  -2   4  -2 62218.2 879.902   2
  -2   4  -2 60585.3 1030.10   3
   2  -4   2 60900.9 774.476   1
  -2   4  -2 57542.7 752.516   1
   2  -4   2 57732.9 1031.21   4
  -2   4  -3 581.518 94.6565   2
   2  -4   3 618.892 92.6338   1
  -2   4  -3 475.873 107.115   3
  -2   4  -3 489.689 83.1500   1
   2  -4   3 604.974 101.008   2
   2  -4   3 423.971 108.554   4
   2  -4   4 2336.13 171.950   1
  -2   4  -4 2478.43 228.043   3
   2  -4   4 2229.00 206.036   4
   2  -4   4 2318.42 170.673   2
  -2   4  -4 2534.61 179.653   2
  -2   4  -5 1635.10 187.267   3
   2  -4   5 1704.74 158.812   1
   2  -4   5 1714.22 149.313   2
   2  -4   5 1516.68 177.631   4
  -2   4  -5 1895.31 156.313   2
   2  -4   6 988.865 120.023   2
  -2   4  -6 1123.76 166.116   3
   2  -4   6 825.162 120.235   1
   2  -4   6 884.302 141.882   4
  -2   4  -6 1037.02 117.631   2
   2  -4   7 428.738 108.079   4
   2  -4   7 531.943 105.475   1
  -2   4  -7 566.302 136.309   3
   2  -4   7 434.251 81.3837   2
  -2   4  -7 763.667 107.550   2
  -2   4  -8 323.362 74.6491   2
  -2   4  -8 133.653 92.2576   3
   2  -4   8 311.673 94.3729   4
   2  -4   8 189.010 85.9357   1
  -2   4  -9 535.843 93.9950   2
   2  -4   9 504.253 110.015   1
   2  -4   9 528.530 135.187   4
  -2   4  -9 474.944 131.031   3
  -2   4  -9 377.876 77.6882   2
  -2   4 -10 76.6096 52.4340   2
   2  -4  10 185.048 81.7059   1
  -2   4 -10 189.826 103.938   3
  -2   4 -10 45.5741 49.8882   2
   2  -4  10 67.7627 81.0635   4
   2  -4  11 6467.42 392.859   4
   2  -4  11 6390.60 376.564   1
  -2   4 -11 6523.50 292.346   2
  -2   4 -11 6429.41 408.964   3
  -2   4 -12 316.910 76.3131   2
   2  -4  12 185.057 88.4351   4
  -2   4 -12 331.885 138.397   3
   2  -4  13 394.601 120.354   4
   2  -4  13 438.008 116.067   1
  -2   4 -13 494.754 142.086   3
  -2   4 -13 547.133 97.7937   2
  -2   4 -14 36.1319 58.0836   2
   2  -4  14 43.4836 84.9282   1
   2  -4  14 88.0615 94.7659   4
  -2   4 -14-38.5929 92.7140   3
  -2   4 -15 5004.91 404.428   3
   2  -4  15 5324.48 383.477   4
   2  -4  15 4433.30 357.874   1
  -2   4 -15 5479.50 291.301   2
   2  -4  16 50.5393 99.4395   1
  -2   4 -16-38.0362 110.289   3
   2  -4  16 19.3519 89.8701   4
   2  -4  17 154.152 119.850   4
  -2   4 -17-19.8338 108.964   3
   2  -4  17-20.8102 84.1967   1
   2  -4  18 170.028 124.167   1
   2  -4  18 192.936 116.383   4
  -2   4 -18 385.220 156.559   3
   2  -4  19 117.722 116.303   1
  -2   4 -19 38.4317 102.590   3
   2  -4  19 77.8867 108.240   4
  -2   4 -20 219.250 116.795   3
   2  -4  20 237.959 140.870   1
   2  -4  20-0.68117 98.7884   4
   2  -4  21 2744.85 316.518   4
  -2   4 -21 2514.49 343.028   3
   2  -4  21 2393.44 321.796   1
   2  -4  22 137.401 133.298   1
   2  -4  22 59.6661 100.340   4
   2  -4  23 306.084 175.449   1
   2  -4  23-27.0435 107.025   4
  -2   4 -23 30.6635 130.248   3
   2  -3 -27 249.460 172.610   3
  -2   3  27 228.845 154.145   2
   2  -3 -26 54.4392 123.354   3
  -2   3  26 113.079 140.266   2
   2  -3 -25 189.179 158.808   3
  -2   3  25-23.9906 110.688   2
   2  -3 -24 305.569 159.752   3
  -2   3  24 96.2237 134.491   2
  -2   3  23-172.697 107.820   1
   2  -3 -23 28.1977 83.1650   4
   2  -3 -23 62.0941 121.393   3
  -2   3  23-67.1283 112.445   2
  -2   3  22 7.53421 76.9656   1
   2  -3 -22 59.0235 87.4468   4
   2  -3 -22-2.57380 127.060   3
  -2   3  22-35.6436 96.2422   2
   2  -3 -21-57.5521 78.4543   4
  -2   3  21-12.6365 109.217   2
  -2   3  21 171.980 99.2195   1
   2  -3 -21-114.310 105.508   3
  -2   3  20 90.6039 80.9361   1
   2  -3 -20 124.465 93.9492   4
   2  -3 -20 179.308 129.659   3
  -2   3  20 4.33735 88.4765   2
  -2   3  19 39.1277 63.8161   1
   2  -3 -19 142.964 85.2575   4
  -2   3  19 146.291 103.882   2
   2  -3 -18 17.0612 75.3579   4
   2  -3 -18-37.8941 82.4573   3
  -2   3  18-58.6779 85.1506   2
  -2   3  18 71.2540 70.6951   1
   2  -3 -17 480.333 120.921   4
   2  -3 -17 704.327 158.583   3
  -2   3  17 488.606 142.491   2
  -2   3  17 374.975 91.1739   1
   2  -3 -16 173.525 91.5144   4
   2  -3 -16 258.441 118.615   3
  -2   3  16 377.953 125.362   2
  -2   3  16 175.080 78.7229   1
   2  -3 -15 10.3500 61.6128   4
  -2   3  15-61.7395 84.6441   2
   2  -3 -15 48.0321 75.4969   3
  -2   3  15 80.2115 63.0839   1
  -2   3  14 1589.42 143.423   1
  -2   3  14 1570.78 197.247   2
   2  -3 -14 1382.93 192.905   3
   2  -3 -14 1565.71 171.178   4
   2  -3 -13 151.083 68.7586   4
   2  -3 -13 186.591 65.8094   1
   2  -3 -13 174.873 105.801   3
  -2   3  13 106.399 86.7935   2
  -2   3  13 113.582 57.3870   1
   2  -3 -12 1168.85 169.283   3
  -2   3  12 1300.85 172.816   2
   2  -3 -12 1511.42 156.674   4
   2  -3 -12 1404.66 123.410   1
  -2   3  12 1370.80 115.958   1
   2  -3 -11 905.919 146.440   3
   2  -3 -11 709.774 84.0971   1
  -2   3  11 724.169 136.753   2
  -2   3  11 661.578 75.8633   1
   2  -3 -11 638.161 107.164   4
  -2   3  10 1281.46 94.0254   1
  -2   3  10 1265.28 167.440   2
   2  -3 -10 1338.95 172.120   3
   2  -3 -10 1259.38 142.365   4
  -2   3   9 4275.13 279.718   2
   2  -3  -9 4013.71 243.355   4
   2  -3  -9 3925.15 267.554   3
  -2   3   9 4306.44 149.647   1
  -2   3   9 4280.99 156.776   1
   2  -3  -8 47.5534 48.2952   4
   2  -3  -8 177.383 80.4552   3
  -2   3   8 106.792 30.1204   1
  -2   3   8 107.152 27.5142   1
  -2   3   8 57.1346 65.1136   2
  -2   3   7 921.717 54.0596   1
  -2   3   7 932.952 59.2551   1
   2  -3  -7 1070.60 141.057   3
  -2   3   7 894.028 128.878   2
   2  -3  -7 892.390 120.069   4
  -2   3   6 2134.12 187.338   2
   2  -3  -6 2355.92 185.610   4
  -2   3   6 1974.81 179.849   3
   2  -3  -5 10171.4 374.823   4
  -2   3   5 10029.4 381.965   3
  -2   3   5 10065.0 379.141   2
  -2   3   4 1323.92 141.832   2
  -2   3   4 1278.94 146.206   3
   2  -3  -4 1429.67 146.013   4
  -2   3   3 608.224 101.142   2
  -2   3   3 671.243 112.795   3
   2  -3  -3 802.951 114.629   4
   2  -3  -2 5060.08 130.590   1
  -2   3   2 5484.27 258.408   2
  -2   3   2 5110.62 126.358   1
   2  -3  -2 5443.47 254.402   2
  -2   3   2 5225.29 276.299   3
   2  -3  -2 5871.95 287.840   4
   2  -3  -1 121.220 37.7865   1
  -2   3   1 19.2768 47.0915   2
   2  -3  -1 120.743 67.3249   2
  -2   3   1 58.3343 30.0158   1
  -2   3   1 170.364 92.9396   3
   2  -3  -1 138.291 85.2994   4
  -2   3   0 5780.68 178.898   1
   2  -3   0 6209.32 185.591   1
  -2   3   0 5946.74 301.606   3
  -2   3   0 5905.93 256.388   2
   2  -3   0 6267.70 260.840   2
   2  -3   0 6029.25 309.225   4
   2  -3   1 73275.6 838.263   2
   2  -3   1 73059.4 688.403   1
  -2   3  -1 73513.0 690.646   1
  -2   3  -1 73669.3 1031.98   3
   2  -3   1 74843.2 1038.60   4
  -2   3  -1 72652.4 848.954   2
  -2   3  -2 28743.9 470.178   1
   2  -3   2 26701.1 632.203   4
  -2   3  -2 27641.4 638.250   3
  -2   3  -2 27904.3 505.636   2
   2  -3   2 27673.3 463.880   1
   2  -3   2 28429.6 501.216   2
  -2   3  -3 3052.91 167.708   1
   2  -3   3 2858.08 164.173   1
  -2   3  -3 3148.80 229.135   3
   2  -3   3 2911.62 212.627   4
   2  -3   3 3184.59 166.300   2
  -2   3  -3 3087.21 168.989   2
  -2   3  -4 2144.37 137.350   2
   2  -3   4 1991.16 186.472   4
   2  -3   4 2294.09 156.399   1
  -2   3  -4 2420.64 203.142   3
  -2   3  -4 2544.19 166.106   1
   2  -3   4 2322.08 140.712   2
  -2   3  -5 2032.69 157.711   1
   2  -3   5 2156.42 161.944   1
  -2   3  -5 1663.24 170.055   3
   2  -3   5 2255.92 137.667   2
   2  -3   5 2093.82 195.905   4
  -2   3  -5 2121.35 136.325   2
   2  -3   6 1377.59 141.887   1
  -2   3  -6 1181.72 156.315   3
   2  -3   6 1161.95 142.217   4
   2  -3   6 1343.95 105.695   2
  -2   3  -6 1514.10 113.452   2
   2  -3   7 7783.68 331.687   1
  -2   3  -7 8544.86 264.166   2
  -2   3  -7 8393.54 397.647   3
   2  -3   7 7880.78 246.770   2
   2  -3   7 7516.56 368.355   4
  -2   3  -8 1743.03 123.558   2
   2  -3   8 1402.20 151.409   1
  -2   3  -8 1348.21 177.004   3
  -2   3  -8 1247.38 104.239   2
   2  -3   8 1462.66 174.548   4
   2  -3   9-65.3320 54.7086   1
  -2   3  -9 67.7282 44.1025   2
  -2   3  -9-24.3865 63.8196   3
  -2   3  -9-25.5321 35.9850   2
  -2   3 -10 322.443 62.6371   2
   2  -3  10 105.349 82.5068   4
   2  -3  10 212.467 88.4389   1
  -2   3 -10 109.075 75.0325   3
  -2   3 -10 238.755 57.4190   2
   2  -3  11 9050.27 417.854   1
  -2   3 -11 8508.93 442.716   3
  -2   3 -11 8984.00 292.707   2
   2  -3  11 9117.36 441.221   4
  -2   3 -11 8794.15 278.408   2
  -2   3 -12 146.800 62.8653   2
   2  -3  12 138.049 91.7373   1
  -2   3 -12 33.1796 72.2668   3
  -2   3 -12 93.3643 48.4085   2
   2  -3  12 232.708 97.3725   4
   2  -3  13 124.848 76.9215   1
  -2   3 -13-19.4509 40.4743   2
  -2   3 -13 45.1322 42.3553   2
  -2   3 -13 5.77356 80.8946   3
   2  -3  13-43.0213 83.9113   4
  -2   3 -14 956.468 183.698   3
   2  -3  14 828.245 155.755   1
  -2   3 -14 894.433 108.018   2
   2  -3  14 1014.06 168.456   4
   2  -3  15 1487.21 204.346   4
   2  -3  15 1225.28 186.568   1
  -2   3 -15 1142.26 195.806   3
  -2   3 -15 1241.26 129.689   2
  -2   3 -16 60.5393 55.9446   2
   2  -3  16 66.6448 95.3828   1
   2  -3  16 37.9004 75.7622   4
  -2   3 -16-99.9407 111.785   3
   2  -3  17 13429.4 605.235   4
   2  -3  17 13411.4 625.623   1
  -2   3 -17 13676.4 650.050   3
  -2   3 -17 12403.8 409.837   2
   2  -3  18 97.4847 94.4573   4
   2  -3  18 199.357 106.836   1
   2  -3  19 100.424 97.9607   4
  -2   3 -19 261.642 120.385   3
   2  -3  19 252.469 117.529   1
   2  -3  20 3098.84 340.468   1
  -2   3 -20 2765.41 323.798   3
   2  -3  20 3281.42 325.939   4
   2  -3  21 1275.40 228.981   1
  -2   3 -21 1388.72 265.278   3
   2  -3  21 1023.28 202.181   4
   2  -3  22-76.7194 126.982   1
   2  -3  22 44.4750 110.641   4
  -2   3 -22-14.4477 120.256   3
   2  -3  23 349.736 166.108   1
   2  -3  23 657.440 180.853   4
  -2   3 -23 515.492 183.456   3
   2  -3  24 312.100 175.990   1
   2  -3  24 154.114 126.218   4
  -2   3 -24 385.820 190.529   3
   2  -2 -27 1716.79 301.718   3
  -2   2  27 1452.08 264.792   2
  -2   2  26 204.043 118.871   1
   2  -2 -26 150.064 133.940   3
   2  -2 -25 1063.21 240.313   3
  -2   2  25 964.496 196.258   1
  -2   2  25 916.290 217.415   2
  -2   2  24 553.671 163.096   1
   2  -2 -24 197.701 120.056   3
  -2   2  24 471.077 172.635   2
  -2   2  23 157.733 102.106   1
   2  -2 -23 265.915 133.200   3
  -2   2  23-124.600 128.183   2
  -2   2  22 597.038 153.560   1
   2  -2 -22 703.307 171.881   3
  -2   2  22 463.265 145.502   2
   2  -2 -21 1627.70 186.120   4
  -2   2  21 1744.67 214.782   1
   2  -2 -21 2176.40 280.330   3
  -2   2  21 2188.28 281.062   2
  -2   2  20 278.592 109.340   1
   2  -2 -20 127.225 65.1693   4
   2  -2 -20 410.958 157.821   3
  -2   2  20 380.952 132.133   2
  -2   2  19 600.486 122.441   1
   2  -2 -19 558.798 121.244   4
   2  -2 -19 317.355 138.761   3
  -2   2  19 703.648 160.253   2
  -2   2  18 7909.84 390.629   1
   2  -2 -18 8262.74 483.343   3
  -2   2  18 8727.54 496.821   2
   2  -2 -18 8517.26 382.791   4
   2  -2 -17 672.415 119.513   4
  -2   2  17 447.780 98.9393   1
   2  -2 -17 630.700 153.096   3
  -2   2  16 1728.80 174.203   1
   2  -2 -16 1512.60 214.729   3
  -2   2  16 2124.56 238.599   2
   2  -2 -16 1839.51 177.355   4
  -2   2  15 44305.3 1011.97   2
   2  -2 -15 40609.3 979.346   3
  -2   2  15 41847.5 776.997   1
   2  -2 -15 43180.4 781.975   4
  -2   2  14 55.7329 57.3654   1
   2  -2 -14 49.9004 56.1878   4
   2  -2 -14 162.863 81.1454   3
  -2   2  14 187.062 90.4680   2
  -2   2  13 722.439 95.8339   1
   2  -2 -13 677.787 141.789   3
  -2   2  13 805.488 137.951   2
   2  -2 -13 611.314 98.3854   1
   2  -2 -13 618.497 101.740   4
   2  -2 -12 11796.0 381.205   4
  -2   2  12 11850.4 348.678   1
  -2   2  12 11566.4 475.140   2
   2  -2 -12 11997.2 481.246   3
   2  -2 -12 11416.3 346.417   1
  -2   2  11 8707.82 279.123   1
  -2   2  11 8092.93 384.457   2
   2  -2 -11 8404.46 277.441   1
   2  -2 -11 8480.46 399.021   3
   2  -2 -11 8598.40 318.534   4
  -2   2  10 4342.36 181.454   1
  -2   2  10 4437.49 281.917   2
   2  -2 -10 4028.76 268.121   3
   2  -2 -10 4085.07 179.526   1
  -2   2  10 3643.07 213.650   4
   2  -2 -10 4182.49 220.529   4
   2  -2  -9 30.1437 30.4940   1
  -2   2   9 37.1174 30.2951   1
  -2   2   9 71.6110 74.1299   2
   2  -2  -9-1.96089 41.5650   4
  -2   2   9 52.1751 49.2905   4
  -2   2   8 1943.17 180.535   2
  -2   2   8 1981.00 99.7772   1
   2  -2  -8 1964.63 183.168   3
   2  -2  -8 2162.15 157.181   4
   2  -2  -8 1997.18 102.916   1
  -2   2   8 1993.23 154.808   4
   2  -2  -7 939.987 134.775   3
   2  -2  -7 1186.26 68.7283   1
  -2   2   7 1133.82 145.750   2
  -2   2   7 1136.93 66.8363   1
   2  -2  -7 1234.45 123.038   4
  -2   2   7 1122.23 118.231   4
  -2   2   6 30870.6 630.260   2
   2  -2  -6 30445.7 654.229   3
  -2   2   6 30738.6 577.729   4
   2  -2  -6 32241.0 579.180   4
   2  -2  -5 1041.56 121.132   2
  -2   2   5 1478.03 138.516   2
  -2   2   5 1368.18 140.363   3
  -2   2   5 1227.89 121.290   4
   2  -2  -5 1418.36 124.526   4
   2  -2  -4 83.1917 53.2413   2
  -2   2   4 90.2296 51.8855   2
  -2   2   4 94.2871 68.4947   3
  -2   2   4 89.7667 53.3018   4
   2  -2  -4 113.848 54.9680   4
   2  -2  -3 692.263 98.1177   2
  -2   2   3 646.306 96.1641   2
  -2   2   3 768.789 97.2120   4
   2  -2  -3 634.216 96.7487   3
  -2   2   3 578.613 98.5547   3
   2  -2  -3 701.935 97.7349   4
   2  -2  -2 22913.3 458.766   2
  -2   2   2 22433.1 464.285   2
   2  -2  -2 23543.9 525.372   3
  -2   2   2 23049.3 527.363   3
   2  -2  -2 23324.8 497.403   4
  -2   2   2 23576.2 501.602   4
  -2   2   1-65.9372 58.1591   4
  -2   2   1 9.40868 17.0260   1
   2  -2  -1 0.85310 14.1446   1
   2  -2  -1 38.0611 42.9146   2
   2  -2  -1-3.18547 51.0666   3
  -2   2   1 33.5152 54.1152   3
   2  -2  -1-20.6565 63.0036   4
  -2   2   1-46.2111 47.0195   2
  -2   2   0 76.7085 47.1254   4
  -2   2   0 79.6572 44.1717   2
   2  -2   0 74.1233 47.2574   2
   2  -2   0 129.024 64.9681   3
  -2   2   0 78.1095 63.9127   3
   2  -2   0 118.097 60.0574   4
   2  -2   0 127.052 28.7871   1
  -2   2   0 127.240 31.3979   1
   2  -2   1 37.6159 40.9733   2
  -2   2  -1 48.1665 33.4895   1
   2  -2   1 138.417 70.1921   4
  -2   2  -1 71.2860 40.2563   2
   2  -2   1 47.4142 52.5817   3
  -2   2  -1-0.98757 58.5307   3
  -2   2  -1 51.8895 48.5975   4
   2  -2   1 1.31001 26.4737   1
   2  -2   2 36.9853 30.9807   2
  -2   2  -2-14.6866 36.2249   2
  -2   2  -2 19.8903 34.8033   1
   2  -2   2 60.5625 66.5787   4
   2  -2   2 156.901 72.4191   3
  -2   2  -2 38.4851 63.6721   3
  -2   2  -2 63.4131 59.1920   4
   2  -2   2 50.2470 36.6593   1
  -2   2  -3 57.0563 42.2691   1
  -2   2  -3 73.4521 37.4609   2
   2  -2   3 34.9809 31.5969   2
   2  -2   3 48.4816 46.7339   1
  -2   2  -3 49.9595 66.4202   3
   2  -2   4 15362.7 366.281   1
  -2   2  -4 16530.7 280.859   2
  -2   2  -4 14049.4 432.968   3
   2  -2   4 14602.4 451.791   4
   2  -2   4 15703.1 268.707   2
  -2   2  -4 16348.0 384.477   1
   2  -2   5 11.9444 24.3950   2
  -2   2  -5-15.5120 26.6364   2
  -2   2  -5 1.87674 40.7670   1
  -2   2  -5-36.2160 62.2305   3
   2  -2   5 52.9829 43.7915   1
   2  -2   5-4.67267 65.3977   4
  -2   2  -6 119.342 33.8931   2
  -2   2  -6 23.7640 43.4783   1
   2  -2   6 69.9123 56.6687   4
  -2   2  -6 38.2731 65.1170   3
   2  -2   6 2.47657 49.4534   1
   2  -2   7 3730.42 218.336   1
  -2   2  -7 3956.93 128.343   2
  -2   2  -7 4252.24 265.711   3
  -2   2  -7 3965.81 133.213   2
   2  -2   7 3939.61 255.222   4
  -2   2  -8 1443.40 85.5259   2
   2  -2   8 1559.89 147.117   1
  -2   2  -8 1557.00 84.1985   2
  -2   2  -8 1398.16 157.407   3
   2  -2   8 1270.17 158.470   4
   2  -2   9 1474.99 148.817   1
  -2   2  -9 1321.61 81.9912   2
  -2   2  -9 1876.99 183.727   3
  -2   2  -9 1459.63 90.0350   2
   2  -2   9 1316.30 165.032   4
   2  -2  10 4239.20 266.080   1
  -2   2 -10 4673.54 158.677   2
  -2   2 -10 4693.71 165.556   2
  -2   2 -10 5097.61 313.304   3
   2  -2  10 4292.86 291.562   4
  -2   2 -11 60.4935 38.5177   2
   2  -2  11 42.4494 68.2942   1
  -2   2 -11 143.951 69.6508   3
  -2   2 -11 40.9862 28.6188   2
  -2   2 -12 867.764 81.6207   2
  -2   2 -12 710.430 133.220   3
  -2   2 -12 744.674 78.4346   2
   2  -2  12 468.322 110.407   1
   2  -2  13 1728.20 198.542   1
  -2   2 -13 1948.95 124.950   2
  -2   2 -13 1914.23 213.406   3
  -2   2 -13 1805.68 124.088   2
  -2   2 -14 8547.63 269.085   2
  -2   2 -14 9031.18 468.752   3
  -2   2 -14 8101.51 417.136   4
  -2   2 -14 8288.44 271.735   2
   2  -2  14 7684.13 416.696   1
  -2   2 -15 200.747 62.4103   2
  -2   2 -15 235.281 92.6648   4
  -2   2 -15 225.507 110.870   3
   2  -2  15 53.0435 78.8693   1
  -2   2 -16-37.0331 51.2786   2
  -2   2 -16 99.6929 74.1903   4
   2  -2  16 74.2319 92.0864   1
  -2   2 -17 1.26108 77.0852   4
  -2   2 -17 43.0288 54.4364   2
  -2   2 -17 76.6362 99.6580   3
   2  -2  17-0.85917 77.2215   1
  -2   2 -18 200.760 69.1815   2
  -2   2 -18 236.512 133.748   3
   2  -2  18 221.617 127.418   1
  -2   2 -19 46.7576 110.512   3
   2  -2  19 181.661 110.107   1
   2  -2  20 4932.24 412.591   1
  -2   2 -20 4854.62 411.793   3
  -2   2 -21-7.15709 110.605   3
   2  -2  21 154.288 95.7075   4
   2  -2  21 268.043 137.793   1
   2  -2  22-22.6956 117.957   4
  -2   2 -22-85.9605 125.159   3
   2  -2  22-222.657 163.528   1
  -2   2 -23 934.048 222.616   3
   2  -2  23 718.731 179.712   4
   2  -2  23 963.685 213.433   1
  -2   2 -24 297.966 165.535   3
   2  -2  24 274.690 156.279   4
   2  -2  24 85.5313 120.572   1
   2  -2  25 36.2029 120.439   1
  -2   2 -25 366.615 199.731   3
   2  -2  25 87.3718 108.349   4
   2  -2  26 159.170 146.436   4
  -2   2 -26-68.6565 152.498   3
  -2   1  28 169.229 150.275   1
  -2   1  28 435.992 181.702   2
  -2   1  27 384.917 166.860   1
  -2   1  27 281.309 160.887   2
   2  -1 -26 146.791 143.821   3
  -2   1  26 473.403 164.714   2
  -2   1  26 499.962 169.804   1
   2  -1 -25 148.953 141.906   3
  -2   1  25 109.381 127.558   2
  -2   1  25 36.6980 117.391   1
  -2   1  24 156.594 111.718   1
   2  -1 -24 367.199 150.188   3
  -2   1  24 129.997 107.706   2
  -2   1  23 423.279 146.068   1
   2  -1 -23 590.351 183.418   3
  -2   1  23 395.909 147.420   2
   2  -1 -22 158.160 127.634   3
  -2   1  22 352.710 125.979   2
  -2   1  22 306.967 124.305   1
  -2   1  21 2.48211 86.6157   1
   2  -1 -21 87.0647 112.168   3
  -2   1  21 339.596 152.191   2
   2  -1 -20-25.7163 57.2192   4
   2  -1 -20-2.58449 96.4877   3
  -2   1  20-94.9664 95.7240   2
  -2   1  20 10.7748 81.8515   1
   2  -1 -19 220.203 114.389   3
   2  -1 -19 228.712 80.1537   4
  -2   1  19 209.939 117.588   2
  -2   1  19 288.308 112.752   1
   2  -1 -18 187.944 74.0969   4
  -2   1  18 263.114 102.386   1
   2  -1 -18 141.590 100.979   3
  -2   1  18 264.199 120.591   2
   2  -1 -17 189.924 67.0528   4
  -2   1  17 436.320 116.502   1
   2  -1 -17 226.763 110.996   3
  -2   1  17 118.397 105.106   2
   2  -1 -16 122.474 62.8694   4
  -2   1  16 205.442 79.7366   1
   2  -1 -16-31.4749 96.2653   3
  -2   1  16 166.252 89.4522   2
  -2   1  15 58.2492 55.6403   4
   2  -1 -15 42.9115 44.9338   4
   2  -1 -15 110.057 84.0962   3
  -2   1  15 80.6059 67.0592   1
  -2   1  15 255.682 114.790   2
  -2   1  14 272.066 68.6787   4
   2  -1 -14 442.954 78.2758   4
  -2   1  14 367.472 92.8465   1
   2  -1 -14 272.360 94.8524   3
  -2   1  14 158.935 85.1021   2
   2  -1 -13 525.417 83.1914   4
  -2   1  13 514.268 94.2548   1
   2  -1 -13 311.562 101.083   3
  -2   1  13 595.282 136.189   2
  -2   1  13 477.441 79.1711   4
   2  -1 -12 63.4342 40.3926   4
  -2   1  12 126.308 62.5379   1
  -2   1  12 146.161 53.9129   4
   2  -1 -12 102.408 83.5604   3
  -2   1  12 64.4766 63.5128   2
  -2   1  11 39.6019 43.3596   1
   2  -1 -11 57.2945 38.5146   4
   2  -1 -11 81.2957 75.9967   3
   2  -1 -11 86.1366 52.3521   1
  -2   1  11 85.5391 69.7049   2
  -2   1  11 59.4852 34.2666   4
  -2   1  10 208.604 52.6742   1
  -2   1  10 101.824 41.8509   4
   2  -1 -10 207.636 77.9229   3
   2  -1 -10 102.428 45.2550   1
  -2   1  10 127.678 68.8643   2
   2  -1 -10 120.269 46.4447   4
  -2   1   9 232.993 57.1388   1
   2  -1  -9 141.744 70.7066   3
   2  -1  -9 242.380 55.9648   1
  -2   1   9 205.018 49.6063   4
  -2   1   9 102.210 67.3074   2
   2  -1  -9 163.204 45.4665   4
   2  -1  -8 131.898 67.0019   3
  -2   1   8 170.872 50.1009   1
   2  -1  -8 176.397 46.5101   1
  -2   1   8 174.484 78.0151   2
   2  -1  -8 101.094 43.7912   4
  -2   1   8 78.6318 40.5750   4
   2  -1  -7 79.1873 41.1040   4
   2  -1  -7 77.8423 59.9062   3
  -2   1   7 92.8516 37.6392   1
  -2   1   7 20.5557 60.3637   2
   2  -1  -7 12.3690 31.3919   1
  -2   1   7 65.4464 38.4711   4
  -2   1   6 604.189 74.0949   4
   2  -1  -6 796.811 120.228   3
  -2   1   6 723.141 105.752   2
  -2   1   6 628.714 59.2090   1
   2  -1  -6 566.182 93.5557   2
   2  -1  -6 549.446 55.1542   1
   2  -1  -6 636.672 78.2196   4
   2  -1  -5 43.5942 44.2761   4
  -2   1   5 64.5395 26.3564   1
   2  -1  -5 25.6304 65.3632   3
   2  -1  -5 4.35343 45.6250   2
  -2   1   5 28.1519 48.1555   2
   2  -1  -5 100.991 61.4116   3
   2  -1  -5 55.5913 25.0018   1
  -2   1   5 21.7026 33.9028   4
   2  -1  -4 436.668 37.1011   1
   2  -1  -4 540.389 81.2536   2
  -2   1   4 527.395 70.6095   4
   2  -1  -4 625.276 94.6042   3
  -2   1   4 576.681 85.9629   2
   2  -1  -4 556.986 73.4182   4
   2  -1  -4 540.411 88.0348   3
  -2   1   4 513.163 44.4488   1
  -2   1   3 91.9490 45.1570   4
   2  -1  -3 9.47234 14.3313   1
   2  -1  -3-43.7479 42.4987   2
  -2   1   3 42.7946 54.5359   2
   2  -1  -3-15.2246 44.8576   3
  -2   1   3-86.3110 58.7076   3
  -2   1   3 5.30047 16.0386   1
   2  -1  -3 107.779 50.2596   4
   2  -1  -2 137.177 23.8899   1
  -2   1   2 186.660 56.0665   4
   2  -1  -2 112.551 22.0244   1
   2  -1  -2 114.089 54.6754   2
  -2   1   2 121.930 44.7150   2
   2  -1  -2 110.015 54.0183   3
   2  -1  -2 152.490 51.9667   4
  -2   1   2 141.543 67.3269   3
   2  -1  -1 961.612 98.6690   4
   2  -1  -1 1003.22 57.9077   1
   2  -1  -1 1006.12 87.9062   2
   2  -1  -1 963.983 105.754   3
  -2   1   1 864.764 82.7290   2
  -2   1   1 1087.15 112.672   3
  -2   1   1 1026.51 97.0444   4
   2  -1  -1 921.078 56.3333   1
   2  -1   0 15116.5 356.429   4
   2  -1   0 13389.8 283.189   2
  -2   1   0 13782.0 274.881   2
   2  -1   0 14175.0 353.914   4
   2  -1   0 14081.6 233.442   1
   2  -1   0 13357.5 353.523   3
  -2   1   0 14043.5 360.578   3
   2  -1   0 13406.0 226.589   1
   2  -1   1 9781.11 299.946   4
  -2   1  -1 9644.35 208.382   2
  -2   1  -1 8793.66 219.439   1
   2  -1   1 9742.06 302.314   3
  -2   1  -1 9392.36 301.009   3
   2  -1   1 9235.38 210.095   1
   2  -1   1 9439.68 213.578   2
   2  -1   1 10259.6 308.338   4
   2  -1   2 1756.93 83.6735   2
  -2   1  -2 1857.46 111.774   1
   2  -1   2 1846.96 137.856   3
  -2   1  -2 1915.06 144.217   3
   2  -1   2 1761.57 136.597   4
   2  -1   2 2069.24 143.023   4
  -2   1  -2 1961.24 83.3921   2
   2  -1   2 2108.14 112.549   1
   2  -1   3 918.833 107.362   4
   2  -1   3 923.409 51.6520   2
  -2   1  -3 1051.68 52.0569   2
   2  -1   3 996.211 108.798   3
  -2   1  -3 884.836 104.928   3
  -2   1  -3 975.652 90.6142   1
   2  -1   3 893.031 109.156   4
   2  -1   3 1102.10 94.9475   1
   2  -1   4 756.366 87.4625   1
   2  -1   4 751.670 97.4297   3
   2  -1   4 708.317 105.445   4
  -2   1  -4 889.487 113.379   4
  -2   1  -4 826.157 102.145   3
  -2   1  -4 916.367 94.5738   1
   2  -1   5 713.882 96.2919   1
  -2   1  -5 458.485 75.0068   1
  -2   1  -5 490.251 93.5792   4
   2  -1   5 557.248 93.1611   3
  -2   1  -5 674.250 97.2630   3
   2  -1   5 580.567 93.4979   4
   2  -1   6 6018.08 251.274   1
  -2   1  -6 6124.80 286.219   4
   2  -1   6 6093.67 267.179   3
  -2   1  -6 6045.45 270.007   3
  -2   1  -6 6524.29 267.835   1
  -2   1  -7 6171.93 295.725   4
  -2   1  -7 6225.77 283.577   3
  -2   1  -7 6244.91 275.347   1
   2  -1   7 6480.42 276.058   1
  -2   1  -8 584.413 101.052   4
  -2   1  -8 649.268 108.264   3
   2  -1   8 598.580 99.3258   1
  -2   1  -9 369.712 33.8085   2
  -2   1  -9 326.169 32.8212   2
  -2   1  -9 334.243 89.2050   3
   2  -1   9 240.384 79.0577   1
   2  -1  10 6254.35 314.503   1
  -2   1 -10 6218.22 321.502   4
  -2   1 -10 5890.27 147.220   2
  -2   1 -10 6466.12 321.482   3
  -2   1 -10 5346.14 141.559   2
  -2   1 -11-19.6185 21.3665   2
  -2   1 -11-41.0615 67.9918   4
  -2   1 -11-18.8911 62.3197   3
   2  -1  11 84.1437 75.3469   1
  -2   1 -11 12.2191 26.7910   2
  -2   1 -12 117.282 78.2321   4
  -2   1 -12-29.1803 28.6456   2
  -2   1 -12 31.9175 71.6405   3
   2  -1  12-1.50433 59.6065   1
  -2   1 -12-45.3296 34.9173   2
   2  -1  13 2616.67 235.551   1
  -2   1 -13 2812.03 239.179   4
  -2   1 -13 3062.06 143.928   2
  -2   1 -13 2799.64 140.510   2
  -2   1 -13 2592.39 237.619   3
  -2   1 -14 103.472 43.9904   2
  -2   1 -14 117.041 70.4706   4
  -2   1 -14 163.749 85.1918   3
   2  -1  14 173.622 81.1638   1
  -2   1 -15 70.3196 77.8665   4
  -2   1 -15 85.3130 51.7551   2
  -2   1 -15 56.1695 88.6094   3
   2  -1  15-50.8079 94.4187   1
   2  -1  16 22280.7 732.121   1
  -2   1 -16 23273.2 726.807   4
  -2   1 -16 24786.7 782.549   3
  -2   1 -17 1941.31 218.620   4
  -2   1 -17 1881.22 236.158   3
   2  -1  17 1803.25 222.577   1
   2  -1  18 1792.50 231.219   1
  -2   1 -18 1509.77 200.970   4
  -2   1 -18 1997.46 244.397   3
   2  -1  19 11361.9 583.847   1
  -2   1 -19 11093.3 536.625   4
  -2   1 -19 11371.3 581.414   3
   2  -1  20 1531.18 231.337   1
  -2   1 -20 1801.87 237.997   4
  -2   1 -20 1816.84 263.573   3
  -2   1 -21 70.9722 98.1271   4
  -2   1 -21 12.1672 92.6875   3
   2  -1  21-143.359 127.326   1
  -2   1 -22 524.250 150.504   4
  -2   1 -22 452.534 166.057   3
   2  -1  22 349.794 142.460   1
  -2   1 -23 386.296 162.798   3
  -2   1 -23 302.099 126.489   4
   2  -1  23 213.207 112.050   1
  -2   1 -24 122.175 120.855   4
   2  -1  24 97.8388 127.317   1
   2  -1  25-121.402 137.843   1
  -2   1 -25-140.994 120.531   4
  -2   1 -25 54.1601 140.304   3
   2  -1  26 1212.79 257.510   1
  -2   1 -26 1404.10 259.187   4
  -2   1 -26 1383.77 277.386   3
  -2   1 -27 341.775 156.331   4
  -2   1 -27 269.162 187.322   3
  -2   0  28 79.7365 142.186   1
  -2   0  27 202.029 141.273   2
  -2   0  26 268.964 137.282   1
   2   0 -26 434.686 197.714   3
  -2   0  26 87.2689 123.272   2
  -2   0  25 72.4573 96.4841   1
   2   0 -25-0.88187 126.631   3
  -2   0  25 235.320 154.526   2
  -2   0  24-51.7926 102.725   1
   2   0 -24-58.0615 109.981   3
  -2   0  24 44.2275 116.163   2
  -2   0  23 56.4548 88.9265   1
   2   0 -23 118.060 113.512   3
  -2   0  23-35.5631 99.4924   2
   2   0 -22 1464.56 243.485   3
  -2   0  22 1503.03 222.558   1
  -2   0  22 1633.56 251.244   2
  -2   0  21 331.810 130.503   1
   2   0 -21 189.821 126.009   3
  -2   0  21 186.915 113.905   2
  -2   0  20 375.992 129.721   1
   2   0 -20 446.680 159.349   3
  -2   0  20 213.925 106.022   2
  -2   0  19 545.021 133.227   1
   2   0 -19 410.941 144.645   3
  -2   0  19 593.168 154.200   2
   2   0 -18 93.7142 48.4107   4
  -2   0  18 68.9923 82.0823   1
   2   0 -18 227.491 114.674   3
  -2   0  18 119.663 107.211   2
   2   0 -17 496.556 143.064   3
  -2   0  17 367.091 110.233   1
  -2   0  17 569.507 137.946   2
   2   0 -17 530.329 80.6566   4
   2   0 -16 18996.8 682.767   3
  -2   0  16 18779.4 615.753   1
   2   0 -16 19729.6 412.249   4
  -2   0  16 20118.2 692.305   2
  -2   0  15 64.4071 41.3012   4
   2   0 -15 83.1274 50.0646   4
   2   0 -15 52.6018 90.9854   3
  -2   0  15-11.7634 68.5809   1
  -2   0  15 76.3672 75.8117   2
   2   0 -14 110.918 36.3110   4
  -2   0  14 110.341 61.5520   1
   2   0 -14 234.313 109.733   3
  -2   0  14 72.8027 77.5378   2
  -2   0  14 178.187 52.4727   4
  -2   0  13 11728.4 484.954   2
   2   0 -13 11383.5 275.205   4
   2   0 -13 10758.1 468.503   3
  -2   0  13 10684.8 411.197   1
  -2   0  13 10706.1 276.451   4
  -2   0  12 6042.84 344.998   2
  -2   0  12 5508.05 285.510   1
   2   0 -12 6185.61 197.785   4
  -2   0  12 5874.79 195.600   4
   2   0 -12 5957.63 340.227   3
   2   0 -11 3461.35 255.739   3
   2   0 -11 3303.15 137.539   4
  -2   0  11 2807.25 196.604   1
  -2   0  11 2735.11 228.823   2
  -2   0  11 2927.25 134.496   4
   2   0 -10 110.320 32.6418   4
   2   0 -10 122.452 79.3903   3
  -2   0  10 76.7619 45.3215   1
  -2   0  10 137.546 71.1895   2
   2   0 -10 96.7191 52.5150   1
  -2   0  10 101.290 31.7887   4
   2   0  -9 1763.83 172.685   3
   2   0  -9 1579.68 86.3358   4
   2   0  -9 1451.22 125.082   1
  -2   0   9 1531.22 168.141   2
  -2   0   9 1768.14 139.927   1
  -2   0   9 1757.58 95.0597   4
   2   0  -8 1355.16 115.323   1
  -2   0   8 1201.91 140.931   2
  -2   0   8 1484.34 125.421   1
   2   0  -8 1414.72 148.224   3
  -2   0   8 1459.59 83.6619   4
   2   0  -8 1478.81 81.4814   4
   2   0  -7 36528.1 556.119   1
   2   0  -7 37285.9 677.009   3
  -2   0   7 37054.4 556.955   1
  -2   0   7 37316.0 700.870   2
  -2   0   7 36770.9 391.473   4
   2   0  -7 37804.3 380.055   4
  -2   0   6 2459.74 102.137   4
   2   0  -6 2677.66 145.182   1
  -2   0   6 2342.99 172.008   3
   2   0  -6 2544.32 174.995   3
  -2   0   6 2405.94 179.884   2
  -2   0   6 2390.13 138.575   1
   2   0  -6 2194.03 165.812   2
   2   0  -6 2617.42 102.654   4
   2   0  -5 315.927 52.7414   1
  -2   0   5 332.451 74.7033   3
   2   0  -5 282.880 71.1232   3
   2   0  -5 329.295 42.1449   4
   2   0  -5 350.450 68.7880   2
  -2   0   5 271.839 51.3041   1
  -2   0   5 319.714 44.7171   4
  -2   0   5 282.811 74.1709   2
  -2   0   4 212.916 44.1742   1
   2   0  -4 261.500 72.8909   3
   2   0  -4 321.795 47.8695   1
   2   0  -4 411.959 75.0497   2
  -2   0   4 369.549 78.6739   2
   2   0  -4 335.148 66.4079   3
   2   0  -4 330.577 43.9079   4
   2   0  -3 68264.1 573.487   4
   2   0  -3 68470.6 780.052   3
   2   0  -3 67252.7 756.322   2
  -2   0   3 66632.2 618.958   1
  -2   0   3 65727.6 761.703   2
   2   0  -3 69888.5 584.796   4
   2   0  -3 69343.0 608.294   1
   2   0  -3 69156.1 765.212   3
   2   0  -2 1028.67 79.5901   4
   2   0  -2 1124.33 83.2088   4
   2   0  -2 849.477 92.6526   3
   2   0  -2 1153.04 105.123   2
  -2   0   2 1030.94 100.332   2
   2   0  -2 1079.05 100.319   3
   2   0  -2 1073.49 79.4481   1
  -2   0   2 977.908 82.3615   1
   2   0  -1 1382.80 100.053   2
  -2   0   1 1305.51 99.8595   2
   2   0  -1 1387.00 92.3210   1
   2   0  -1 1377.80 96.3641   4
   2   0  -1 1482.52 114.150   3
  -2   0   1 1395.54 108.567   3
  -2   0   1 1350.63 90.4041   1
   2   0  -1 1440.57 96.8749   4
   2   0   0 84637.9 747.708   4
  -2   0   0 80624.7 743.046   4
   2   0   0 82154.2 685.877   2
   2   0   0 82599.8 685.845   1
  -2   0   0 81291.6 684.062   2
   2   0   0 84137.7 757.640   3
  -2   0   0 81951.0 759.059   3
  -2   0   0 82246.7 682.763   1
   2   0   1 2194.41 130.291   4
  -2   0  -1 2037.72 128.396   4
   2   0   1 2124.89 101.647   2
   2   0   1 1974.46 114.344   1
  -2   0  -1 1943.24 100.133   2
   2   0   1 1967.52 119.768   3
  -2   0  -1 1930.29 120.740   3
   2   0   1 2108.53 118.204   1
   2   0   2 3454.24 167.819   4
  -2   0  -2 3701.63 179.730   4
   2   0   2 3731.12 162.919   1
   2   0   2 3547.52 114.616   2
   2   0   2 3589.51 158.468   3
  -2   0  -2 3425.65 118.347   2
  -2   0  -2 3578.73 162.347   3
   2   0   2 3446.80 157.649   1
   2   0   3 59681.7 417.524   2
   2   0   3 59671.3 407.943   2
  -2   0  -3 59718.7 657.663   3
   2   0   3 58574.1 646.284   3
  -2   0  -3 61525.3 696.263   1
   2   0   3 61172.0 735.812   4
   2   0   3 60398.3 678.871   1
  -2   0  -3 59716.4 742.213   4
   2   0   4 5186.34 226.824   4
  -2   0  -4 5575.32 242.023   4
   2   0   4 4917.18 100.141   2
   2   0   4 5086.13 198.092   3
  -2   0  -4 5265.06 205.123   3
  -2   0  -4 5761.83 226.220   1
   2   0   4 5252.59 214.627   1
   2   0   4 4385.87 99.3822   2
  -2   0  -5 3403.41 200.984   4
   2   0   5 3524.17 175.493   3
  -2   0  -5 4019.24 187.695   3
   2   0   5 3347.62 193.230   4
   2   0   5 3402.24 185.297   1
  -2   0  -5 3621.61 194.031   1
  -2   0  -6 7665.50 307.032   4
   2   0   6 7458.26 281.640   1
   2   0   6 7530.51 300.014   4
  -2   0  -6 7288.42 262.846   3
   2   0   6 7983.57 268.063   3
  -2   0  -6 8240.36 298.829   1
  -2   0  -7 27188.2 585.109   4
   2   0   7 27256.6 510.795   3
  -2   0  -7 28529.8 537.384   3
  -2   0  -7 28919.9 585.940   1
   2   0   7 28465.0 575.774   1
   2   0   8 5100.60 260.397   1
   2   0   8 4328.28 100.245   2
   2   0   8 4964.46 234.028   3
  -2   0  -8 5007.47 237.395   3
  -2   0  -8 4443.53 107.773   2
  -2   0  -8 5101.64 271.560   4
  -2   0  -9 1601.49 158.909   4
   2   0   9 1287.30 146.389   1
   2   0   9 1392.05 68.0396   2
   2   0   9 1301.52 133.274   3
  -2   0  -9 1457.40 140.325   3
  -2   0  -9 1331.65 70.4596   2
  -2   0 -10 1644.57 172.883   4
   2   0  10 1703.45 85.8285   2
  -2   0 -10 1406.80 143.593   3
  -2   0 -10 1671.06 86.7046   2
   2   0  10 1745.83 171.710   1
   2   0  11 1530.47 169.019   1
  -2   0 -11 1221.43 160.655   4
  -2   0 -11 1523.38 92.5460   2
   2   0  11 1293.25 82.8878   2
  -2   0 -11 1443.61 156.983   3
   2   0  12 13418.5 490.048   1
  -2   0 -12 13338.3 482.478   4
   2   0  12 13508.6 282.672   2
  -2   0 -12 14141.0 474.383   3
  -2   0 -12 13983.2 291.642   2
   2   0  13 2131.22 212.322   1
  -2   0 -13 2530.24 214.411   3
  -2   0 -13 2137.38 204.813   4
  -2   0 -13 2571.60 137.281   2
   2   0  13 2409.00 130.563   2
  -2   0 -14 486.934 111.231   4
  -2   0 -14 420.220 66.5336   2
  -2   0 -14 235.288 93.3364   3
   2   0  14 303.339 101.320   1
   2   0  14 409.287 63.9464   2
  -2   0 -15 27.5027 69.8447   4
  -2   0 -15-7.48672 41.9775   2
  -2   0 -15 18.0307 67.5454   3
   2   0  15-8.79394 81.5553   1
   2   0  15-28.0439 40.4959   2
   2   0  16 10866.5 509.403   1
  -2   0 -16 10547.8 333.284   2
  -2   0 -16 10513.2 482.335   4
  -2   0 -16 11128.9 492.396   3
   2   0  16 10680.3 326.268   2
  -2   0 -17 104.700 83.5894   4
  -2   0 -17 54.2096 71.0088   3
   2   0  17 25.1823 79.3698   1
   2   0  17 171.853 64.5222   2
  -2   0 -18 90.5021 83.7356   4
  -2   0 -18 134.229 91.5415   3
   2   0  18 137.337 103.334   1
   2   0  18-79.8978 56.8639   2
  -2   0 -19 932.125 174.977   4
   2   0  19 651.634 108.802   2
  -2   0 -19 544.801 153.546   3
   2   0  19 721.604 158.850   1
  -2   0 -20 203.747 125.037   4
  -2   0 -20 527.467 154.432   3
   2   0  20 209.908 73.7470   2
   2   0  20 192.952 116.649   1
  -2   0 -21 345.342 144.036   4
  -2   0 -21 239.022 119.288   3
   2   0  21 36.2860 94.4879   1
   2   0  22 1615.28 245.103   1
  -2   0 -22 1960.63 269.404   3
  -2   0 -22 1565.83 231.471   4
   2   0  23 234.470 139.965   1
  -2   0 -23 88.0427 103.217   3
  -2   0 -23-93.8533 119.084   4
  -2   0 -24 85.2797 104.758   4
  -2   0 -24 93.0029 113.503   3
   2   0  24-73.3155 123.260   1
  -2   0 -25 74.5079 115.290   4
   2   0  25 204.768 114.131   1
  -2   0 -25-42.6812 102.686   3
  -2   0 -26 357.968 160.084   4
  -2   0 -26 59.7386 111.425   3
   2   0  26 143.886 132.400   1
  -2   0 -27 14.9025 107.500   4
  -2   0 -27 284.915 173.931   3
   2   0  27 53.6302 128.102   1
  -2   0 -28 381.937 160.962   4
  -2   0 -28 178.667 141.102   3
  -2  -1  27 356.913 181.817   1
  -2  -1  27 252.680 153.544   2
   2   1 -26 204.128 152.948   3
  -2  -1  26 596.808 184.378   1
  -2  -1  26 589.056 194.167   2
  -2  -1  25 333.128 136.740   1
  -2  -1  25 386.961 159.638   2
  -2  -1  24 190.433 126.494   1
   2   1 -24 350.085 164.219   3
  -2  -1  24 116.810 128.326   2
  -2  -1  23-110.052 119.136   1
   2   1 -23 2.42616 114.865   3
  -2  -1  23-39.4563 106.915   2
  -2  -1  22 280.470 128.113   1
  -2  -1  22 301.194 139.923   2
   2   1 -21 178.356 129.390   3
  -2  -1  21-113.946 104.199   1
  -2  -1  21 30.3112 92.6861   2
  -2  -1  20 980.553 188.846   1
   2   1 -20 774.561 176.666   3
  -2  -1  20 788.687 169.930   2
  -2  -1  19 845.538 167.999   1
  -2  -1  19 1100.84 197.542   2
   2   1 -19 1042.04 201.290   3
  -2  -1  18 913.866 173.854   1
   2   1 -18 673.674 159.268   3
  -2  -1  18 891.757 183.386   2
  -2  -1  17 346.859 113.778   1
   2   1 -17 589.847 148.999   3
  -2  -1  17 369.802 129.151   2
   2   1 -16 3369.22 140.695   4
   2   1 -16 4016.00 321.444   3
  -2  -1  16 4367.87 335.780   2
  -2  -1  16 3498.77 284.847   1
  -2  -1  15 33.3307 26.3562   4
   2   1 -15 47.9949 27.0109   4
  -2  -1  15 29.7219 63.6980   1
   2   1 -15 3.41057 82.5857   3
  -2  -1  15 92.4373 74.0323   2
   2   1 -14 3142.40 271.685   3
   2   1 -14 2435.27 103.184   4
  -2  -1  14 2706.07 232.477   1
  -2  -1  14 3131.62 273.718   2
  -2  -1  14 2356.34 106.420   4
   2   1 -13 476.396 42.8561   4
   2   1 -13 816.502 146.719   3
  -2  -1  13 785.935 133.336   1
  -2  -1  13 601.854 126.245   2
   2   1 -12 1389.49 173.425   3
  -2  -1  12 1396.43 178.197   2
  -2  -1  12 1032.96 138.457   1
  -2  -1  12 824.189 47.4674   4
   2   1 -11 4182.20 276.268   3
  -2  -1  11 4490.55 296.557   2
  -2  -1  11 4391.38 265.030   1
   2   1 -10 112.936 69.2607   3
  -2  -1  10 108.264 68.9765   1
  -2  -1  10 125.609 77.3623   2
  -2  -1   9 819.542 122.083   2
  -2  -1   9 854.295 115.288   1
   2   1  -8 1521.69 152.749   3
  -2  -1   8 1498.55 167.469   2
  -2  -1   8 1328.39 138.263   1
   2   1  -7 5230.07 245.554   1
   2   1  -7 5426.04 258.424   3
  -2  -1   7 5378.47 279.885   2
  -2  -1   7 5389.22 248.992   1
  -2  -1   6 2759.45 185.090   3
   2   1  -6 2880.73 180.955   3
   2   1  -6 3069.40 183.089   1
  -2  -1   6 2865.77 199.870   2
  -2  -1   6 2730.17 175.888   1
   2   1  -5 574.151 92.5552   3
  -2  -1   5 868.123 103.636   3
   2   1  -5 764.529 98.4488   2
   2   1  -5 712.919 90.5232   1
  -2  -1   5 653.895 105.479   2
  -2  -1   5 615.541 86.4350   1
  -2  -1   4 1812.30 131.444   3
   2   1  -4 1768.97 144.641   2
  -2  -1   4 1590.53 147.264   2
   2   1  -4 1637.13 125.644   1
   2   1  -4 1689.49 127.427   3
  -2  -1   4 1700.21 135.179   1
   2   1  -4 1352.34 56.5038   4
   2   1  -4 1083.89 57.7195   4
   2   1  -3 26.2060 24.1010   4
  -2  -1   3 12.9552 39.7638   3
   2   1  -3 8.55295 36.2710   3
  -2  -1   3-79.5663 40.6195   1
  -2  -1   3 20.2721 20.6062   4
   2   1  -3 42.1914 44.7927   2
  -2  -1   3-45.6997 55.5550   2
   2   1  -3 63.5053 49.3624   1
  -2  -1   2 651.017 57.4867   4
  -2  -1   2 617.465 83.5601   1
   2   1  -2 626.253 73.3697   3
   2   1  -2 531.945 81.6254   2
   2   1  -2 545.330 68.5436   3
   2   1  -2 665.864 81.6100   1
   2   1  -2 615.969 60.2682   4
  -2  -1   2 564.875 87.3591   2
   2   1  -1 15857.8 286.582   4
  -2  -1   1 15635.4 284.037   4
   2   1  -1 16511.4 362.220   1
   2   1  -1 16507.8 309.416   3
  -2  -1   1 15914.3 364.940   1
   2   1  -1 16903.9 373.702   2
   2   1  -1 17052.8 313.862   3
   2   1   0 7361.93 249.057   1
   2   1   0 7721.08 200.658   3
   2   1   0 6440.71 226.216   2
   2   1   0 7337.87 236.390   2
  -2  -1   0 7456.15 251.315   1
   2   1   0 7631.46 199.554   3
   2   1   0 7227.60 212.941   4
  -2  -1   0 6886.42 210.206   4
   2   1   1 1598.63 113.156   4
  -2  -1  -1 1421.73 104.100   4
   2   1   1 1617.36 122.405   1
   2   1   1 1518.37 105.972   2
   2   1   1 1769.36 91.8793   3
  -2  -1  -1 1847.10 95.6673   3
  -2  -1  -1 1646.98 124.672   1
   2   1   1 1677.74 109.011   2
  -2  -1  -2 1018.26 102.450   1
   2   1   2 1135.88 74.2851   3
   2   1   2 1026.14 85.5457   2
   2   1   2 1016.87 105.020   1
  -2  -1  -2 1147.21 77.2263   3
   2   1   2 1205.45 102.112   4
  -2  -1  -2 900.322 91.4317   4
   2   1   2 1012.78 82.2103   2
   2   1   3 29.3672 44.9572   1
   2   1   3 11.6356 34.6765   2
  -2  -1  -3 25.9572 44.2311   4
   2   1   3 34.7606 44.5679   4
  -2  -1  -3 60.2057 39.2702   2
   2   1   3 30.4449 25.1134   3
  -2  -1  -3-25.5001 30.3426   3
   2   1   3 138.529 52.1248   1
  -2  -1  -4 856.313 74.2615   2
  -2  -1  -4 700.177 93.7969   4
   2   1   4 830.171 103.923   1
   2   1   4 727.434 66.8844   2
   2   1   4 698.437 60.5896   3
  -2  -1  -4 766.713 69.3172   3
   2   1   4 793.355 104.245   1
   2   1   4 879.721 104.191   4
   2   1   5 442.432 89.3365   1
   2   1   5 386.964 79.2349   4
  -2  -1  -5 440.802 79.6961   4
   2   1   5 460.811 54.9631   3
  -2  -1  -5 461.934 60.3674   3
   2   1   5 465.306 56.0759   2
   2   1   5 390.194 78.2059   1
  -2  -1  -5 455.731 56.3742   2
   2   1   6 492.435 84.9453   4
   2   1   6 589.786 93.6801   1
   2   1   6 342.316 50.7103   2
   2   1   6 467.083 64.1896   3
  -2  -1  -6 525.627 57.7093   2
  -2  -1  -6 457.803 67.7505   3
  -2  -1  -6 426.116 91.0429   4
  -2  -1  -6 595.749 94.3829   1
  -2  -1  -7-2.08005 28.5065   2
  -2  -1  -7-0.78504 54.5624   4
   2   1   7-2.35602 63.9502   1
   2   1   7 46.4318 32.5731   2
   2   1   7 60.2188 42.1662   3
  -2  -1  -7-35.4459 42.3508   3
   2   1   8 42.2201 35.7534   2
  -2  -1  -8 59.5603 58.3936   4
   2   1   8 12.7922 42.5608   3
  -2  -1  -8-38.5162 41.6390   3
   2   1   8 31.2374 51.2738   1
  -2  -1  -8-26.7226 33.3988   2
  -2  -1  -9 71.5513 39.9405   2
   2   1   9 62.5447 55.5218   1
   2   1   9 24.3830 35.4286   2
   2   1   9-4.31240 46.6205   3
  -2  -1  -9-30.1184 48.8967   3
  -2  -1  -9 45.2703 58.7949   4
  -2  -1 -10 32.6050 32.2832   2
  -2  -1 -10 80.5826 54.7751   4
   2   1  10-9.33568 56.9302   1
   2   1  10 34.8385 43.1702   3
   2   1  10-33.2053 38.7940   2
  -2  -1 -10 93.1016 60.0614   3
  -2  -1 -11-4.78633 40.3055   2
   2   1  11 133.713 78.0210   1
   2   1  11 0.07530 36.6544   2
  -2  -1 -11-34.7368 46.9076   3
  -2  -1 -11 76.7382 81.6070   4
  -2  -1 -12 402.714 97.1720   3
  -2  -1 -12 285.844 49.6143   2
   2   1  12 442.367 105.122   1
  -2  -1 -12 268.812 89.8180   4
   2   1  12 237.294 55.8255   2
  -2  -1 -13 41.1206 80.3487   4
   2   1  13-18.0793 62.8406   1
  -2  -1 -13 66.2726 45.6496   2
   2   1  13-27.3586 47.9487   2
  -2  -1 -13 17.2581 60.1597   3
  -2  -1 -14-69.5644 70.4781   4
  -2  -1 -14 15.2512 40.3556   2
   2   1  14-41.7365 80.0662   1
  -2  -1 -14-0.17331 61.7148   3
   2   1  14-43.8541 50.1267   2
  -2  -1 -15 2991.49 258.968   4
   2   1  15 2789.49 173.515   2
  -2  -1 -15 2711.28 227.419   3
   2   1  15 2775.13 255.353   1
  -2  -1 -15 2968.74 187.970   2
  -2  -1 -16 642.536 97.6465   2
  -2  -1 -16 573.459 127.799   4
  -2  -1 -16 587.819 118.813   3
   2   1  16 619.012 95.8156   2
   2   1  16 559.411 137.135   1
   2   1  17 969.068 171.340   1
  -2  -1 -17 1210.56 186.153   4
   2   1  17 1221.46 130.883   2
  -2  -1 -17 1204.25 175.228   3
  -2  -1 -18 3772.01 313.296   4
  -2  -1 -18 3537.28 287.975   3
   2   1  18 3470.48 320.045   1
   2   1  18 3655.36 224.718   2
  -2  -1 -19 599.291 146.970   4
  -2  -1 -19 444.600 138.519   3
   2   1  19 613.233 106.006   2
  -2  -1 -20 34.5261 87.2795   4
  -2  -1 -20-23.9289 85.3375   3
   2   1  20-48.7045 65.8207   2
   2   1  20-80.5981 89.2822   1
  -2  -1 -21 2.40762 88.4104   4
  -2  -1 -21-47.0427 109.915   3
   2   1  21-33.0411 60.6311   2
   2   1  21 14.8829 106.273   1
  -2  -1 -22 593.291 165.675   4
   2   1  22 248.859 122.172   1
  -2  -1 -22 328.071 131.236   3
  -2  -1 -23-59.2258 100.615   4
  -2  -1 -23-32.0977 104.136   3
   2   1  23-61.3603 108.270   1
  -2  -1 -24-32.3725 100.710   4
  -2  -1 -24 17.0764 101.497   3
   2   1  24 91.9375 113.507   1
  -2  -1 -25 733.371 170.160   4
  -2  -1 -25 466.841 160.679   3
   2   1  25 603.929 170.942   1
  -2  -1 -26 192.679 129.011   4
  -2  -1 -26 469.385 175.747   3
   2   1  26 201.425 143.692   1
  -2  -1 -27 379.909 161.780   4
  -2  -1 -27 230.634 126.303   3
   2   1  27 438.057 189.241   1
  -2  -1 -28 2708.91 351.018   4
  -2  -1 -28 3164.00 392.486   3
  -2  -1 -29 167.846 151.298   4
  -2  -1 -29 89.7509 173.248   3
  -2  -2  26-67.6757 125.815   1
   2   2 -25 91.2731 157.859   3
  -2  -2  25 178.992 128.270   1
  -2  -2  25 141.311 114.426   2
   2   2 -24 584.737 187.751   3
  -2  -2  24 369.200 167.150   1
  -2  -2  24 531.694 180.992   2
   2   2 -23 38.6175 117.838   3
  -2  -2  23-27.1067 106.998   1
  -2  -2  23 57.3203 126.060   2
   2   2 -22 67.1906 125.465   3
  -2  -2  22 73.3004 115.518   1
  -2  -2  22 441.504 165.224   2
   2   2 -21 98.1830 124.218   3
  -2  -2  21 428.930 149.996   1
  -2  -2  21 243.370 120.579   2
   2   2 -20 3980.21 368.410   3
  -2  -2  20 3549.50 343.793   1
  -2  -2  20 3533.46 350.483   2
   2   2 -19 193.268 137.322   3
  -2  -2  19 198.867 120.658   1
  -2  -2  19-27.0034 97.8027   2
   2   2 -18 9.63544 101.770   3
  -2  -2  18 19.7994 79.7338   1
  -2  -2  18 140.412 90.2390   2
   2   2 -17 125.478 93.0998   3
  -2  -2  17 12.0408 69.7595   1
  -2  -2  17 175.951 106.639   2
   2   2 -16 161.538 115.349   3
  -2  -2  16 311.460 112.418   1
  -2  -2  16 104.937 92.9732   2
   2   2 -15 208.128 91.4760   3
  -2  -2  15-18.2055 68.5368   1
  -2  -2  15 299.478 111.771   2
   2   2 -14 8639.83 446.308   3
  -2  -2  14 8747.46 446.751   1
  -2  -2  14 9411.47 471.653   2
   2   2 -13-17.3449 82.4822   3
  -2  -2  13-7.31105 65.5599   1
  -2  -2  13-15.7890 84.6229   2
   2   2 -12 131.786 88.9407   3
  -2  -2  12 122.283 69.3504   1
  -2  -2  12 119.945 87.0619   2
   2   2 -11-12.8613 64.5434   3
  -2  -2  11 11.8161 59.8207   1
  -2  -2  11-72.2680 80.2283   2
  -2  -2  10 2716.59 230.532   2
   2   2 -10 2612.79 211.812   3
  -2  -2  10 2213.45 195.647   1
   2   2  -9 2058.34 183.570   3
  -2  -2   9 2002.35 201.685   2
  -2  -2   9 1953.94 184.273   1
   2   2  -8 5855.63 283.894   3
  -2  -2   8 5445.16 307.355   2
  -2  -2   8 4829.79 273.763   1
   2   2  -7 1393.84 142.175   3
  -2  -2   7 1472.62 162.909   2
  -2  -2   7 1248.09 145.170   1
  -2  -2   6-12.6351 58.7111   1
  -2  -2   6 3.08501 52.3569   3
   2   2  -6 26.6091 49.8503   3
  -2  -2   6 8.37268 55.7318   2
   2   2  -5 932.587 129.447   2
  -2  -2   5 768.254 100.446   3
   2   2  -5 1025.35 115.595   3
  -2  -2   5 924.637 115.146   1
  -2  -2   4 14343.0 359.285   3
   2   2  -4 14543.2 353.968   3
   2   2  -4 13659.0 194.037   4
   2   2  -4 13603.5 409.544   1
  -2  -2   4 13888.9 413.443   1
   2   2  -4 14680.6 444.048   2
  -2  -2   3 442.666 44.9312   4
  -2  -2   3 459.350 71.1179   3
   2   2  -3 438.916 69.8140   3
   2   2  -3 470.144 46.2345   4
  -2  -2   3 461.664 87.4790   1
   2   2  -3 240.368 78.7177   2
   2   2  -3 327.508 78.7819   1
   2   2  -2 46.5352 30.6194   4
   2   2  -2-8.66815 46.7072   1
  -2  -2   2 87.6061 36.4171   4
  -2  -2   2 71.8643 42.1010   3
   2   2  -2 21.7847 35.8246   3
  -2  -2   2 161.993 74.6658   1
   2   2  -2 56.3719 57.6828   2
   2   2  -2 19.9995 51.0359   2
   2   2  -1-18.2175 32.2131   4
   2   2  -1 123.457 56.2139   1
  -2  -2   1 37.8037 31.8423   3
   2   2  -1 0.84474 28.6298   3
  -2  -2   1 12.7259 32.6348   4
   2   2  -1 11.5939 48.7431   2
  -2  -2   1 98.3465 58.9967   1
   2   2   0 55.2777 39.6105   4
  -2  -2   0 8.63275 40.2454   4
   2   2   0 89.8106 55.3023   2
  -2  -2   0-6.44311 52.5526   1
   2   2   0 25.2849 24.5986   3
   2   2   0-5.97999 42.4511   1
   2   2   0-24.1079 28.8085   3
  -2  -2  -1 1232.65 108.640   4
   2   2   1 1038.02 117.280   1
   2   2   1 1198.57 100.152   4
   2   2   1 1116.64 58.9785   3
  -2  -2  -1 972.840 110.786   1
   2   2   1 1004.55 57.4109   3
   2   2   1 1256.18 120.872   2
  -2  -2  -1 1151.27 113.588   2
   2   2   2 24967.1 536.462   1
   2   2   2 22786.5 206.807   3
  -2  -2  -2 23117.6 508.777   1
  -2  -2  -2 22776.7 459.526   4
  -2  -2  -2 23838.3 473.307   2
   2   2   2 22481.2 453.770   2
   2   2   2 23113.1 448.938   4
   2   2   3 425.542 69.3956   2
  -2  -2  -3 271.102 66.7180   4
  -2  -2  -3 359.052 74.2161   1
   2   2   3 325.432 77.6446   1
   2   2   3 362.131 68.4009   4
  -2  -2  -3 270.003 65.5513   2
  -2  -2  -4 440.866 92.4715   4
   2   2   4 473.439 82.3489   4
   2   2   4 424.050 72.0988   2
  -2  -2  -4 499.584 96.4154   1
   2   2   4 571.217 95.6999   1
  -2  -2  -4 515.490 79.0916   2
  -2  -2  -5 4607.86 236.313   4
   2   2   5 4731.10 113.557   3
  -2  -2  -5 4203.01 115.146   3
   2   2   5 4959.23 242.697   4
   2   2   5 4806.85 254.823   1
  -2  -2  -5 5235.60 215.970   2
   2   2   5 4498.57 201.229   2
  -2  -2  -6 24030.7 554.493   4
  -2  -2  -6 23747.0 310.189   3
   2   2   6 23516.2 297.538   3
   2   2   6 22907.4 571.405   1
  -2  -2  -6 24059.6 457.416   2
   2   2   6 23308.0 450.242   2
  -2  -2  -7 3898.95 144.214   3
   2   2   7 4178.97 145.810   3
  -2  -2  -7 4177.29 241.957   4
   2   2   7 3745.56 186.734   2
   2   2   7 3472.10 234.536   1
  -2  -2  -7 4001.92 193.370   2
   2   2   8 2047.81 139.920   2
  -2  -2  -8 2335.53 195.277   4
   2   2   8 2263.22 121.612   3
  -2  -2  -8 2195.61 123.959   3
  -2  -2  -8 2405.72 155.220   2
   2   2   8 1948.08 178.260   1
  -2  -2  -9 2854.92 221.915   4
   2   2   9 2656.30 162.456   2
   2   2   9 2948.73 150.909   3
  -2  -2  -9 3213.39 160.684   3
   2   2   9 3184.27 233.702   1
  -2  -2  -9 3140.04 176.451   2
  -2  -2 -10 1855.94 182.836   4
   2   2  10 1657.79 132.626   2
  -2  -2 -10 1851.67 139.527   2
  -2  -2 -10 1551.57 123.138   3
   2   2  10 1506.92 121.425   3
   2   2  10 1844.15 182.521   1
  -2  -2 -11 18557.2 571.108   4
   2   2  11 17067.6 415.902   3
  -2  -2 -11 19726.8 453.552   3
   2   2  11 18372.9 435.494   2
  -2  -2 -11 19361.1 456.518   2
   2   2  11 16704.3 554.446   1
   2   2  12 835.881 107.038   2
   2   2  12 748.209 99.3906   3
  -2  -2 -12 1042.95 117.519   3
  -2  -2 -12 778.417 128.532   4
  -2  -2 -12 921.774 112.228   2
   2   2  12 776.821 138.539   1
  -2  -2 -13 350.377 107.710   4
  -2  -2 -13 479.099 88.0260   2
   2   2  13 469.004 112.122   1
   2   2  13 353.182 77.9180   2
  -2  -2 -13 268.890 69.5260   3
  -2  -2 -14 108.148 85.9431   4
   2   2  14 30.1474 76.6480   1
   2   2  14-13.5307 53.3870   2
  -2  -2 -14 124.145 71.2349   3
  -2  -2 -15 27222.9 770.226   4
   2   2  15 26105.7 581.114   2
  -2  -2 -15 27441.9 669.121   3
   2   2  15 26560.0 777.589   1
  -2  -2 -16 325.208 119.255   4
   2   2  16 317.483 115.779   1
   2   2  16 145.077 58.9217   2
  -2  -2 -16 148.395 82.8172   3
  -2  -2 -17-56.4516 88.3439   4
   2   2  17 142.924 75.4741   1
  -2  -2 -17 134.813 87.9511   3
   2   2  17 165.332 69.1966   2
  -2  -2 -18 222.971 86.3308   4
   2   2  18 380.838 127.057   1
  -2  -2 -18 274.240 92.3863   3
   2   2  18 446.131 97.7707   2
  -2  -2 -19 527.042 138.646   4
  -2  -2 -19 537.598 123.721   3
   2   2  19 716.540 166.157   1
   2   2  19 635.605 118.471   2
  -2  -2 -20 763.712 172.419   4
  -2  -2 -20 611.061 142.344   3
   2   2  20 671.874 161.007   1
   2   2  20 576.137 115.508   2
  -2  -2 -21 764.300 178.397   4
  -2  -2 -21 712.643 148.594   3
   2   2  21 837.103 138.006   2
   2   2  21 711.932 171.253   1
  -2  -2 -22 96.7627 104.659   4
  -2  -2 -22 210.432 104.062   3
   2   2  22 57.8181 67.2275   2
   2   2  22 118.899 117.518   1
  -2  -2 -23 71.2496 100.359   4
  -2  -2 -23-41.9626 86.5339   3
   2   2  23-248.243 142.155   1
  -2  -2 -24 687.228 176.905   3
   2   2  24 830.098 209.482   1
  -2  -2 -24 618.186 152.736   4
  -2  -2 -25 95.2652 120.544   4
  -2  -2 -25 86.5379 127.128   3
   2   2  25-175.093 145.992   1
  -2  -2 -26 19.2489 120.531   4
  -2  -2 -26 100.722 124.393   3
   2   2  26-116.541 155.459   1
  -2  -2 -27-10.6571 135.597   4
  -2  -2 -27 44.8470 109.725   3
   2   2  27-35.1302 112.746   1
  -2  -2 -28 2151.55 308.050   4
  -2  -2 -29 138.509 142.385   4
   2   3 -25-451.957 213.353   2
  -2  -3  25-140.422 153.532   1
   2   3 -24 70.5293 155.320   3
  -2  -3  24 657.194 205.007   1
   2   3 -24 563.392 193.931   2
   2   3 -23-190.067 164.289   3
   2   3 -23 190.748 155.000   2
  -2  -3  23 53.3822 104.244   1
   2   3 -22 98.2288 117.604   3
  -2  -3  22-172.150 119.281   1
   2   3 -22 310.559 150.204   2
   2   3 -21 1243.07 235.349   3
  -2  -3  21 1241.77 232.847   1
   2   3 -21 1748.87 270.060   2
   2   3 -20 1231.54 242.084   3
  -2  -3  20 1156.36 218.308   1
   2   3 -20 1388.78 245.334   2
   2   3 -19 627.552 174.793   3
  -2  -3  19 243.332 113.695   1
   2   3 -19 717.619 180.696   2
   2   3 -18 425.251 136.401   3
  -2  -3  18 638.210 166.486   1
   2   3 -18 860.779 189.175   2
   2   3 -17 5780.61 411.779   3
  -2  -3  17 5963.30 436.225   1
   2   3 -17 6583.48 458.492   2
   2   3 -16 30.9947 92.0765   3
  -2  -3  16 240.485 118.328   1
   2   3 -16 308.803 131.706   2
   2   3 -15 2162.73 248.800   2
  -2  -3  15 1795.23 227.488   1
   2   3 -15 1470.23 214.238   3
   2   3 -14 548.399 136.158   3
  -2  -3  14 419.492 122.979   1
   2   3 -14 307.448 108.971   2
   2   3 -13 431.690 115.596   3
   2   3 -13 222.250 100.959   2
  -2  -3  13 169.404 86.3241   1
   2   3 -12 2147.95 233.005   2
   2   3 -12 2186.71 221.715   3
  -2  -3  12 2113.64 227.328   1
   2   3 -11 2177.55 213.822   3
  -2  -3  11 2190.31 226.713   1
   2   3 -11 2009.11 225.572   2
   2   3 -10 858.321 158.591   2
   2   3 -10 941.656 145.187   3
  -2  -3  10 908.475 145.443   1
  -2  -3   9 228.280 83.6540   1
   2   3  -9 404.879 93.8699   3
   2   3  -9 516.007 118.964   2
   2   3  -8 1786.40 190.714   2
   2   3  -8 1466.31 153.907   3
  -2  -3   8 1690.35 184.361   1
   2   3  -7 4590.52 301.176   2
  -2  -3   7 3428.48 96.8274   4
   2   3  -7 5076.22 260.323   3
  -2  -3   7 4419.99 287.741   1
  -2  -3   7 3932.34 102.365   4
   2   3  -6 2599.14 222.811   2
   2   3  -6 2452.48 174.673   3
   2   3  -6 2103.69 90.3350   4
  -2  -3   6 2338.97 94.3875   4
  -2  -3   6 2332.29 202.535   1
  -2  -3   5 2119.98 157.022   3
   2   3  -5 2019.85 152.616   3
  -2  -3   5 1735.34 176.208   1
   2   3  -5 1448.42 169.853   2
   2   3  -5 1763.59 94.1178   4
  -2  -3   5 2092.92 98.9165   4
   2   3  -4 51.5255 56.0170   3
  -2  -3   4 39.8421 28.7174   4
   2   3  -4 67.2508 65.4371   2
  -2  -3   4 84.4299 50.3090   3
  -2  -3   4 85.8405 73.8563   1
   2   3  -4 150.585 41.7679   4
   2   3  -3 1033.20 99.0595   3
  -2  -3   3 955.262 98.3602   3
   2   3  -3 1112.02 86.6830   4
   2   3  -3 1125.39 140.932   2
  -2  -3   3 927.004 84.1402   4
  -2  -3   3 1029.78 138.055   1
  -2  -3   2 47827.2 583.399   4
  -2  -3   2 48141.1 577.847   3
   2   3  -2 46227.3 555.067   3
  -2  -3   2 45419.3 816.322   1
   2   3  -2 49421.7 574.921   4
   2   3  -2 48532.0 832.161   2
  -2  -3   1 47643.0 625.979   4
  -2  -3   1 47115.2 828.119   1
  -2  -3   1 49666.1 526.265   3
   2   3  -1 47784.6 507.442   3
   2   3  -1 49034.0 824.008   2
   2   3  -1 49094.6 618.761   4
  -2  -3   0 12894.7 343.430   4
  -2  -3   0 13331.0 235.192   3
  -2  -3   0 12055.1 418.435   1
   2   3   0 12587.9 224.825   3
   2   3   0 12399.3 413.322   2
  -2  -3  -1 5657.78 238.226   4
  -2  -3  -1 5203.99 121.692   3
  -2  -3  -1 5587.89 284.244   1
   2   3   1 4767.97 110.967   3
   2   3   1 4915.46 255.126   2
   2   3   1 6007.26 237.382   4
  -2  -3  -2 3302.32 193.160   4
   2   3   2 3381.16 214.188   2
  -2  -3  -2 2902.98 211.085   1
   2   3   2 3565.62 192.285   4
   2   3   3 369.818 77.5753   4
   2   3   3 360.116 83.7774   2
  -2  -3  -3 178.421 62.3823   1
  -2  -3  -3 384.617 84.5663   4
  -2  -3  -4 3841.94 227.288   4
  -2  -3  -4 3524.11 215.177   2
   2   3   4 3681.43 217.589   2
  -2  -3  -5 11851.5 407.952   4
  -2  -3  -5 12458.0 436.574   1
  -2  -3  -5 11890.9 385.742   2
   2   3   5 11815.2 384.331   2
  -2  -3  -6 1619.93 162.843   4
   2   3   6 1467.85 169.029   1
  -2  -3  -6 1666.71 151.404   2
   2   3   6 1691.09 151.841   2
  -2  -3  -7 793.254 123.904   4
  -2  -3  -7 581.254 43.4856   3
   2   3   7 929.513 129.205   1
   2   3   7 794.214 105.908   2
  -2  -3  -8 4888.01 291.130   4
   2   3   8 4737.22 147.350   3
  -2  -3  -8 4941.52 149.424   3
   2   3   8 4792.02 290.563   1
   2   3   8 5098.45 259.676   2
   2   3   9 39.0114 58.5484   1
   2   3   9-0.77954 49.1757   2
   2   3   9 17.5385 31.2562   3
  -2  -3  -9 71.9827 31.8509   3
  -2  -3  -9 84.9001 61.8771   4
  -2  -3 -10 56.7704 66.8399   4
   2   3  10 286.211 89.8260   1
   2   3  10 103.058 55.9042   2
   2   3  10 189.020 47.3159   3
  -2  -3 -10 227.746 45.8253   3
  -2  -3 -11 2694.35 246.054   4
   2   3  11 2951.19 206.824   2
   2   3  11 2809.94 158.638   3
  -2  -3 -11 3078.13 165.422   3
   2   3  11 3171.32 253.141   1
  -2  -3 -12 65.3269 73.5033   4
   2   3  12-46.3972 63.8074   1
   2   3  12-59.0556 56.8261   3
   2   3  12 19.0227 56.5370   2
  -2  -3 -12-6.79976 45.0610   3
  -2  -3 -13 194.304 100.469   4
   2   3  13 103.813 77.3193   1
   2   3  13 72.8584 60.4574   3
   2   3  13 157.848 64.9945   2
  -2  -3 -13 119.778 55.1514   3
  -2  -3 -14 7965.27 428.828   4
   2   3  14 7877.14 351.839   2
  -2  -3 -14 7545.17 318.948   3
   2   3  14 8118.40 431.236   1
  -2  -3 -15 1167.39 177.210   4
   2   3  15 996.628 140.162   2
   2   3  15 703.549 144.779   1
  -2  -3 -15 820.967 123.571   3
  -2  -3 -16 134.283 85.1617   4
   2   3  16 384.704 106.943   2
   2   3  16 525.510 141.219   1
  -2  -3 -16 447.672 100.865   3
  -2  -3 -17 2078.87 199.827   3
   2   3  17 2406.63 215.976   2
  -2  -3 -17 2324.65 260.735   4
   2   3  17 2352.52 259.140   1
  -2  -3 -18 291.889 126.648   4
   2   3  18 155.824 106.852   1
   2   3  18 45.8357 63.4306   2
  -2  -3 -18 60.7257 63.8528   3
  -2  -3 -19 192.356 112.575   4
   2   3  19-111.636 87.2953   1
  -2  -3 -19 69.6844 79.8954   3
   2   3  19 4.40601 62.6880   2
  -2  -3 -20-15.9050 80.8192   4
   2   3  20 126.777 87.7917   1
  -2  -3 -20 2.84252 76.3083   3
   2   3  20 72.3081 82.2547   2
  -2  -3 -21 16.2907 87.2094   4
  -2  -3 -21 110.951 105.896   3
   2   3  21 109.094 106.284   1
   2   3  21 91.6796 66.9423   2
  -2  -3 -22-198.601 112.377   4
  -2  -3 -22 85.4248 98.8372   3
   2   3  22 33.6726 109.212   1
  -2  -3 -23 115.836 124.592   4
  -2  -3 -23 2.91775 93.3355   3
   2   3  23 60.8409 83.2014   2
   2   3  23 221.734 137.431   1
  -2  -3 -24-9.66031 125.643   4
  -2  -3 -24 126.142 115.931   3
   2   3  24 16.6620 119.246   1
  -2  -3 -25 264.038 159.770   4
  -2  -3 -25-25.5245 118.599   3
   2   3  25 82.1172 126.846   1
  -2  -3 -26 140.030 138.090   4
  -2  -3 -26-143.086 121.904   3
   2   3  26 94.5112 141.142   1
  -2  -3 -27 164.286 154.871   4
  -2  -3 -27-32.1169 129.259   3
   2   3  27 371.052 175.061   1
  -2  -3 -28-120.600 128.784   4
   2   4 -24 585.014 200.828   2
   2   4 -23-22.3148 122.901   3
   2   4 -23 118.673 127.413   2
  -2  -4  23 223.700 152.397   1
   2   4 -22 609.482 192.827   3
   2   4 -22 392.601 172.070   2
  -2  -4  22 212.011 140.175   1
   2   4 -21 4922.38 455.647   3
  -2  -4  21 4033.11 423.674   1
   2   4 -21 4068.43 418.358   2
   2   4 -20-2.76699 103.975   3
  -2  -4  20 411.644 161.921   1
   2   4 -20 156.553 142.294   2
   2   4 -19 392.020 143.479   2
   2   4 -19 416.865 149.958   3
  -2  -4  19 59.4419 102.594   1
   2   4 -18 2385.30 295.335   2
   2   4 -18 2689.08 316.017   3
  -2  -4  18 3128.55 345.522   1
  -2  -4  17-77.2887 85.9579   1
   2   4 -17-9.24736 95.0129   3
   2   4 -17 45.5684 95.1212   2
   2   4 -16 38.1237 96.1991   3
   2   4 -16 96.9017 103.651   2
  -2  -4  16 77.5213 90.6986   1
   2   4 -15 3067.06 321.679   2
   2   4 -15 2998.24 294.859   3
  -2  -4  15 2735.71 293.521   1
  -2  -4  14 1737.36 231.786   1
   2   4 -14 1706.65 219.666   3
   2   4 -14 1465.37 218.218   2
  -2  -4  13 206.630 113.964   1
   2   4 -13 308.505 115.447   3
   2   4 -13 175.196 104.128   2
   2   4 -12 268.579 102.120   3
  -2  -4  12 113.744 93.6763   1
   2   4 -12-65.9742 110.156   2
   2   4 -11 7413.18 393.469   3
  -2  -4  11 7388.52 434.136   1
   2   4 -11 7757.80 455.171   2
  -2  -4  10 842.128 61.8040   4
   2   4 -10 921.475 140.748   3
  -2  -4  10 1285.33 183.394   1
  -2  -4  10 1101.77 72.6057   4
   2   4 -10 1238.01 189.421   2
  -2  -4   9 99.0126 31.0798   4
   2   4  -9 234.576 86.9941   3
  -2  -4   9 144.197 85.2219   1
  -2  -4   9 68.2480 26.2348   4
   2   4  -9 4.44397 76.2333   2
   2   4  -8 44.4923 65.0315   2
  -2  -4   8 96.0541 33.8358   4
  -2  -4   8 152.569 42.1133   4
  -2  -4   8 70.4439 66.5764   1
   2   4  -8 72.6267 66.2791   3
   2   4  -7 445.779 115.232   2
  -2  -4   7 552.052 120.241   1
   2   4  -7 491.427 64.2455   4
   2   4  -7 448.045 95.1792   3
  -2  -4   7 570.369 67.9390   4
   2   4  -6 2647.10 242.235   2
   2   4  -6 2936.17 201.024   3
   2   4  -6 2680.84 142.844   4
  -2  -4   6 2674.27 241.346   1
  -2  -4   6 2832.59 143.676   4
   2   4  -5 105.203 88.4625   2
  -2  -4   5 119.263 43.2807   4
   2   4  -5 87.6601 43.2325   4
  -2  -4   5-0.61128 59.4761   1
   2   4  -5 117.373 58.9086   3
  -2  -4   4 1179.45 123.537   3
   2   4  -4 1097.05 116.728   3
   2   4  -4 956.645 100.509   4
  -2  -4   4 1107.64 153.173   1
  -2  -4   4 840.332 89.4078   4
   2   4  -4 1086.76 156.033   2
   2   4  -3 185.839 86.5773   2
  -2  -4   3 79.0036 45.5486   4
   2   4  -3 130.451 53.4041   4
  -2  -4   3 181.272 63.7805   3
   2   4  -3 74.8897 48.9742   3
  -2  -4   3 78.9200 56.5173   1
  -2  -4   2 67813.5 1108.54   1
  -2  -4   2 69321.6 749.300   3
   2   4  -2 67761.5 735.090   3
   2   4  -2 69132.9 824.299   4
   2   4  -2 68835.3 1103.83   2
  -2  -4   2 68759.3 829.335   4
   2   4  -1 181.988 62.9092   4
  -2  -4   1 214.850 63.8347   4
  -2  -4   1 114.115 49.2223   3
   2   4  -1 184.675 52.9606   3
   2   4  -1 115.394 73.0157   2
  -2  -4   1 24.0911 69.7362   1
  -2  -4   0 864.704 147.264   1
  -2  -4   0 761.033 68.7126   3
   2   4   0 786.846 72.1987   3
   2   4   0 849.923 138.554   2
   2   4   0 719.955 97.4654   4
  -2  -4   0 661.194 96.5913   4
   2   4   1 278.796 83.4332   2
  -2  -4  -1 302.790 39.3576   3
  -2  -4  -1 388.078 96.2921   1
   2   4   1 277.250 38.1732   3
  -2  -4  -1 325.897 79.3776   4
  -2  -4  -2 4217.50 97.9784   3
   2   4   2 4815.18 284.302   2
  -2  -4  -2 4683.94 292.405   1
  -2  -4  -2 4778.57 256.487   4
  -2  -4  -3 1087.65 131.405   4
   2   4   3 1333.04 155.338   2
  -2  -4  -3 1240.87 158.271   1
  -2  -4  -4 628.324 104.238   4
   2   4   4 914.312 140.221   2
  -2  -4  -4 971.928 137.265   1
  -2  -4  -5 620.497 115.446   4
   2   4   5 888.155 132.163   2
  -2  -4  -5 912.271 137.566   1
  -2  -4  -6 638.906 121.160   1
  -2  -4  -6 632.927 124.114   4
   2   4   6 673.384 121.033   2
  -2  -4  -7 2258.86 208.423   4
   2   4   7 2736.57 238.180   1
   2   4   7 2628.23 215.339   2
   2   4   8 383.734 103.088   1
  -2  -4  -8 505.506 109.061   4
   2   4   8 475.841 102.296   2
  -2  -4  -8 340.855 31.7769   3
  -2  -4  -8 316.031 29.6355   3
   2   4   9-62.8028 84.0534   1
   2   4   9 79.2911 71.6761   2
  -2  -4  -9 11.2404 20.8407   3
  -2  -4  -9-2.49265 18.6455   3
  -2  -4  -9 90.5386 82.9483   4
   2   4  10 2905.47 223.420   2
  -2  -4 -10 3386.99 140.469   3
  -2  -4 -10 3225.33 265.601   4
  -2  -4 -10 3051.88 131.747   3
   2   4  10 3042.93 259.801   1
  -2  -4 -11 5404.80 350.391   4
   2   4  11 5845.59 320.985   2
  -2  -4 -11 6104.00 209.837   3
  -2  -4 -11 5618.94 202.280   3
   2   4  11 5637.55 358.539   1
   2   4  12-11.3953 77.4895   1
  -2  -4 -12 136.486 71.0487   4
   2   4  12 146.929 82.7454   2
  -2  -4 -12 150.622 52.3305   3
  -2  -4 -13-90.9587 99.3638   4
   2   4  13 39.3975 81.2221   1
   2   4  13-18.7596 48.4706   3
   2   4  13 78.0383 70.7745   2
  -2  -4 -13 56.0503 43.5691   3
  -2  -4 -14 7433.09 437.387   4
   2   4  14 7356.58 372.113   2
  -2  -4 -14 7523.21 296.016   3
   2   4  14 7753.07 438.841   1
  -2  -4 -15-33.1746 92.3195   4
   2   4  15 61.6264 74.9996   1
   2   4  15 176.343 95.5056   2
  -2  -4 -15 58.0458 60.8410   3
  -2  -4 -16 167.354 95.9799   4
   2   4  16 134.594 100.938   1
   2   4  16 170.573 80.8235   2
  -2  -4 -16 157.684 73.4668   3
  -2  -4 -17-1.49626 89.5632   4
   2   4  17-83.6144 92.4530   1
   2   4  17 32.2696 68.3277   2
  -2  -4 -17 84.8087 76.7288   3
  -2  -4 -18 598.812 153.960   4
  -2  -4 -18 729.223 130.634   3
   2   4  18 585.287 132.133   2
  -2  -4 -19 414.376 138.495   4
   2   4  19 407.828 142.174   1
   2   4  19 249.362 89.5790   2
  -2  -4 -19 382.045 102.826   3
  -2  -4 -20 1390.97 229.096   4
   2   4  20 1398.95 196.763   2
  -2  -4 -20 1263.50 172.089   3
   2   4  20 1021.02 199.963   1
  -2  -4 -21 303.317 137.525   4
   2   4  21 409.116 164.330   1
   2   4  21 216.606 110.433   2
  -2  -4 -21 250.938 88.2394   3
  -2  -4 -22 108.424 137.123   4
   2   4  22 12.2836 115.757   1
  -2  -4 -22 82.2673 77.2797   3
   2   4  22-37.3902 83.0298   2
  -2  -4 -23 355.045 131.549   4
  -2  -4 -23 638.126 154.025   3
   2   4  23 741.130 186.934   1
   2   4  23 447.606 126.738   2
  -2  -4 -24 45.8740 114.034   4
  -2  -4 -24-65.8976 114.600   3
   2   4  24 59.8819 84.0790   2
   2   4  24 265.138 132.710   1
  -2  -4 -25 151.237 154.877   4
   2   4  25 61.2634 121.690   1
  -2  -4 -26 242.823 157.780   4
   2   4  26 239.732 152.736   1
   2   4  27 2758.80 368.279   1
  -2  -4 -27 2835.56 366.825   4
   2   5 -23 46.8167 155.606   2
   2   5 -22 1075.65 261.057   2
   2   5 -22 1473.01 292.731   3
   2   5 -21 697.696 196.630   2
   2   5 -21 398.977 172.233   3
  -2  -5  21 478.224 185.775   1
   2   5 -20 133.320 130.044   3
   2   5 -20 93.6645 133.851   2
  -2  -5  20 382.569 157.709   1
   2   5 -19 267.215 155.010   2
   2   5 -19 379.933 167.170   3
  -2  -5  19 409.492 168.919   1
   2   5 -18 1953.79 274.661   3
   2   5 -18 2477.77 324.634   2
  -2  -5  18 2162.73 306.797   1
  -2  -5  17 87.3882 106.948   1
   2   5 -17 141.189 117.381   2
   2   5 -17 3.51656 113.811   3
   2   5 -16 532.484 162.553   2
  -2  -5  16 215.305 121.466   1
   2   5 -16 280.195 115.750   3
   2   5 -15 2232.24 287.532   2
   2   5 -15 2004.06 249.710   3
  -2  -5  15 1566.17 245.815   1
   2   5 -14 44.6854 104.269   2
  -2  -5  14 180.898 123.368   1
   2   5 -14 31.4839 78.9305   3
  -2  -5  13 569.502 148.976   1
   2   5 -13 644.031 161.663   2
   2   5 -13 889.683 166.198   3
   2   5 -12 222.538 121.142   2
  -2  -5  12 104.339 103.817   1
   2   5 -12 192.067 94.5660   3
  -2  -5  11 85.6900 93.7330   1
   2   5 -11 140.486 96.2643   3
   2   5 -11 77.3754 78.7196   2
  -2  -5  10 68.3018 38.6217   4
  -2  -5  10 62.2923 95.5217   1
   2   5 -10 144.070 81.6998   3
   2   5 -10 158.804 98.1441   2
  -2  -5   9 245.806 56.7601   4
  -2  -5   9 95.4281 87.3976   1
   2   5  -9 197.645 122.823   2
   2   5  -9 86.2496 71.3005   3
   2   5  -8 2432.52 272.602   2
   2   5  -8 2679.63 226.022   3
  -2  -5   8 2411.33 258.935   1
  -2  -5   8 2390.74 153.348   4
   2   5  -7 941.087 175.933   2
  -2  -5   7 799.643 146.321   1
   2   5  -7 1105.95 144.842   3
   2   5  -7 1038.31 112.462   4
  -2  -5   7 990.464 105.748   4
  -2  -5   6 2164.80 239.719   1
   2   5  -6 1843.46 151.759   4
   2   5  -6 2209.34 192.839   3
   2   5  -6 1823.35 228.340   2
  -2  -5   6 1986.42 149.372   4
   2   5  -5 167.398 100.946   2
  -2  -5   5 60.3790 50.2465   4
  -2  -5   5 92.5755 83.3351   1
   2   5  -5 73.1188 55.7327   3
   2   5  -5 174.352 66.4656   4
   2   5  -4-33.3489 69.5856   2
  -2  -5   4-10.6648 50.0971   4
  -2  -5   4 114.005 78.0469   1
   2   5  -4 156.236 63.4377   3
   2   5  -4 135.918 66.2601   4
  -2  -5   3 16775.5 612.225   1
   2   5  -3 16704.9 609.660   2
  -2  -5   3 16092.2 424.615   3
  -2  -5   3 16191.7 449.575   4
   2   5  -3 16015.7 418.202   3
  -2  -5   2 28613.0 794.380   1
  -2  -5   2 27639.0 524.380   3
   2   5  -2 28306.1 520.977   3
   2   5  -2 27382.7 778.921   2
  -2  -5   2 27228.3 598.080   4
   2   5  -1 5968.71 365.767   2
  -2  -5   1 5902.00 364.088   1
  -2  -5   1 6310.54 233.841   3
   2   5  -1 6573.82 236.993   3
  -2  -5   1 5667.83 283.378   4
   2   5   0 1615.89 197.746   2
  -2  -5   0 1448.85 189.248   1
  -2  -5   0 1608.67 111.239   3
   2   5   0 1634.83 111.259   3
  -2  -5   0 1328.32 150.220   4
  -2  -5  -1 9147.55 228.141   3
  -2  -5  -1 8321.37 414.418   1
   2   5   1 8684.37 223.797   3
   2   5   1 9720.36 453.319   2
  -2  -5  -1 8064.73 359.448   4
  -2  -5  -2 51.8416 60.9214   4
   2   5   2 100.177 69.9381   2
  -2  -5  -2 64.2248 25.6251   3
  -2  -5  -2 136.398 89.5282   1
   2   5   2 52.3800 26.6946   3
  -2  -5  -3 1571.41 172.776   4
   2   5   3 1489.82 188.481   2
  -2  -5  -3 1580.55 68.2579   3
  -2  -5  -3 1663.07 190.793   1
   2   5   3 1445.06 61.8014   3
  -2  -5  -4 3388.40 250.058   4
  -2  -5  -4 3106.06 251.635   1
   2   5   4 3752.12 284.906   2
  -2  -5  -5 1781.69 202.070   1
   2   5   5 1816.85 197.189   2
  -2  -5  -5 1681.11 187.566   4
  -2  -5  -6 439.889 105.232   4
   2   5   6 183.066 77.4951   2
  -2  -5  -6 368.666 118.684   1
  -2  -5  -7 6958.02 392.979   1
  -2  -5  -7 6580.36 367.571   4
   2   5   7 6351.19 363.113   2
  -2  -5  -8 932.310 159.006   4
   2   5   8 798.242 149.401   1
   2   5   9 1154.07 169.398   2
  -2  -5  -9 938.527 168.188   4
  -2  -5  -9 830.513 49.8667   3
   2   5   9 1283.26 183.427   1
  -2  -5  -9 757.132 48.0427   3
  -2  -5 -10 6340.72 389.968   4
  -2  -5 -10 6483.72 168.314   3
   2   5  10 6878.72 374.887   2
   2   5  10 7096.72 408.682   1
   2   5  11-31.9751 76.1816   1
  -2  -5 -11 101.433 94.2690   4
   2   5  11 89.8400 63.7675   2
  -2  -5 -11 70.7558 31.2368   3
  -2  -5 -11 104.607 35.4907   3
   2   5  12 69.4216 89.0341   1
  -2  -5 -12 4.28300 90.2195   4
   2   5  12-144.811 90.6430   2
  -2  -5 -12-45.2946 36.0647   3
  -2  -5 -13 16520.8 669.916   4
   2   5  13 16451.7 600.029   2
  -2  -5 -13 16876.6 381.103   3
   2   5  13 15973.0 651.578   1
   2   5  14 3973.26 304.116   2
  -2  -5 -14 4046.55 341.029   4
   2   5  14 4224.51 340.338   1
  -2  -5 -14 3885.62 199.272   3
   2   5  15 3064.41 267.759   2
  -2  -5 -15 2545.54 174.710   3
   2   5  15 2843.18 281.460   1
  -2  -5 -15 2945.66 294.672   4
  -2  -5 -16 11224.5 591.704   4
   2   5  16 11608.1 522.630   2
  -2  -5 -16 11320.2 388.522   3
   2   5  16 11386.4 576.898   1
   2   5  17 2225.02 245.255   2
  -2  -5 -17 2209.76 280.480   4
  -2  -5 -17 2212.88 190.831   3
   2   5  17 2175.00 260.227   1
  -2  -5 -18-31.9999 130.864   4
   2   5  18 119.205 104.863   1
   2   5  18 265.297 117.585   2
  -2  -5 -18 68.3753 57.1695   3
  -2  -5 -19-146.622 99.4533   4
   2   5  19 27.7188 86.9149   1
   2   5  19 13.0959 90.3501   2
  -2  -5 -20 119.932 93.0261   4
   2   5  20 292.153 150.381   1
   2   5  20 386.233 112.777   2
   2   5  21 28.1749 91.5579   1
  -2  -5 -21 37.2452 98.6337   4
   2   5  21 41.5138 89.7503   2
  -2  -5 -22 69.2559 116.557   4
   2   5  22 111.862 108.226   1
   2   5  22 68.3381 87.0583   2
  -2  -5 -23 325.288 149.108   4
   2   5  23 341.156 153.210   1
   2   5  23 47.6101 111.321   2
  -2  -5 -24 37.8549 118.492   4
   2   5  24 176.441 137.926   1
   2   5  24 80.1351 111.443   2
  -2  -5 -25 498.205 195.814   4
   2   5  25 340.224 167.999   1
  -2  -5 -26 1750.05 293.098   4
   2   5  26 1524.31 282.249   1
   2   6 -20-48.3318 153.704   2
   2   6 -20 134.055 150.577   3
   2   6 -19-49.0435 139.552   2
  -2  -6  19-287.991 162.137   1
   2   6 -18 89.5242 118.991   2
  -2  -6  18 598.257 203.755   1
   2   6 -18 525.552 185.680   3
   2   6 -17 108.370 142.146   2
  -2  -6  17-36.9107 114.788   1
   2   6 -17 238.535 154.603   3
  -2  -6  16 143.137 130.576   1
   2   6 -16-115.352 120.812   2
   2   6 -16-2.90945 97.5609   3
   2   6 -15 128.508 128.176   2
   2   6 -15 90.8112 107.115   3
  -2  -6  14 96.9623 121.714   1
   2   6 -14 34.8167 90.8486   3
   2   6 -14 81.6820 117.862   2
   2   6 -13 1150.16 211.908   2
   2   6 -13 1299.92 214.520   3
  -2  -6  13 1318.11 233.212   1
   2   6 -12 2257.14 260.005   3
  -2  -6  12 2606.01 313.315   1
   2   6 -12 2680.10 327.666   2
  -2  -6  11 235.981 110.752   1
   2   6 -11 622.229 141.186   3
   2   6 -11 474.342 153.089   2
   2   6 -10 490.691 148.616   2
  -2  -6  10 243.375 115.673   1
   2   6 -10 222.359 98.4475   3
   2   6  -9 750.665 175.768   2
  -2  -6   9 615.442 152.146   1
   2   6  -9 917.197 153.651   3
  -2  -6   8 454.227 89.9031   4
  -2  -6   8 464.671 149.650   1
   2   6  -8 746.976 180.986   2
   2   6  -8 517.544 121.931   3
   2   6  -7 1171.46 159.167   3
   2   6  -7 1378.06 218.041   2
  -2  -6   7 971.417 123.071   4
  -2  -6   7 1114.41 194.297   1
   2   6  -6 807.827 181.847   2
  -2  -6   6 567.735 98.5961   4
   2   6  -6 686.191 128.358   3
  -2  -6   6 781.195 168.540   1
   2   6  -5 836.681 177.964   2
   2   6  -5 906.792 131.135   3
  -2  -6   5 959.245 175.326   1
  -2  -6   5 902.923 119.631   4
  -2  -6   4 298.505 84.2002   4
   2   6  -4 420.854 129.342   2
   2   6  -4 442.970 92.1185   3
  -2  -6   3 49433.6 1137.40   1
   2   6  -3 47827.5 790.262   3
   2   6  -3 49127.7 1142.93   2
  -2  -6   3 45908.9 857.665   4
  -2  -6   2 231.209 88.3513   4
   2   6  -2 274.676 80.1844   3
   2   6  -2 447.015 144.361   2
  -2  -6   2 152.316 92.7423   1
  -2  -6   1 1044.07 174.325   1
   2   6  -1 966.211 114.087   3
   2   6  -1 991.699 184.905   2
  -2  -6   1 896.670 139.326   4
  -2  -6   0 1527.04 210.115   1
  -2  -6   0 1830.24 134.396   3
   2   6   0 1701.08 131.872   3
   2   6   0 1851.46 230.275   2
  -2  -6   0 1478.52 170.932   4
  -2  -6  -1 4583.67 191.552   3
  -2  -6  -1 4989.27 351.152   1
   2   6   1 4984.93 196.971   3
   2   6   1 5080.29 360.230   2
  -2  -6  -1 4443.63 296.328   4
  -2  -6  -2 1403.92 99.6181   3
  -2  -6  -2 1604.35 207.425   1
   2   6   2 1455.32 98.7397   3
   2   6   2 1491.16 199.069   2
  -2  -6  -2 1529.79 181.996   4
  -2  -6  -3 76.0827 73.6292   4
   2   6   3 195.402 103.828   2
  -2  -6  -3 87.2009 30.2017   3
  -2  -6  -3-64.9274 71.0133   1
   2   6   3 36.0232 30.9463   3
  -2  -6  -4 597.179 138.451   1
  -2  -6  -4 675.618 138.117   4
   2   6   4 709.421 156.094   2
  -2  -6  -4 693.861 56.5051   3
  -2  -6  -4 664.709 52.9985   3
  -2  -6  -5 43.6947 67.0452   4
   2   6   5-1.28502 75.8493   2
  -2  -6  -5 26.9292 13.9098   3
  -2  -6  -5-58.3102 90.7927   1
  -2  -6  -5 35.7764 15.1753   3
  -2  -6  -6 3245.62 284.955   1
   2   6   6 3591.38 302.103   2
  -2  -6  -6 3423.71 288.767   4
  -2  -6  -7 90.5232 71.3023   4
   2   6   7 77.8087 91.9849   2
  -2  -6  -7 133.541 106.581   1
  -2  -6  -8 340.881 109.581   4
  -2  -6  -8 237.209 98.9129   1
   2   6   8 384.378 115.375   2
   2   6   9 140.075 98.6186   1
  -2  -6  -9-95.0794 110.494   4
   2   6   9 99.8752 88.3579   2
  -2  -6 -10 6019.21 406.507   4
   2   6  10 7339.34 431.608   2
   2   6  10 7050.56 437.165   1
   2   6  11 19.3179 87.9543   1
  -2  -6 -11 183.295 117.855   4
   2   6  11-31.2999 90.4228   2
   2   6  12 215.462 115.663   1
  -2  -6 -12 111.472 87.7755   4
   2   6  12 274.464 100.339   2
  -2  -6 -13 80.2563 105.842   4
   2   6  13-23.9179 86.1388   1
   2   6  13 135.480 108.806   2
  -2  -6 -14-91.9802 112.818   4
   2   6  14-9.16062 87.2712   1
   2   6  14-89.0290 114.250   2
  -2  -6 -15 22.1162 88.2354   4
   2   6  15 21.6957 81.2779   1
   2   6  15 146.241 83.0423   2
  -2  -6 -16 3324.66 349.084   4
   2   6  16 3578.76 345.359   1
   2   6  16 3412.74 311.762   2
  -2  -6 -17 147.145 99.9271   4
   2   6  17 439.537 142.191   1
   2   6  17 173.994 111.488   2
  -2  -6 -18 308.737 121.898   4
   2   6  18 461.044 149.866   1
   2   6  18 613.837 159.758   2
  -2  -6 -19 2782.81 339.908   4
   2   6  19 2018.68 277.296   1
   2   6  19 2148.34 266.707   2
  -2  -6 -20 130.246 105.180   4
   2   6  20 12.4241 95.2817   1
   2   6  20 26.3073 92.2184   2
  -2  -6 -21 161.638 139.055   4
   2   6  21 58.3963 111.951   1
   2   6  21-7.05014 104.341   2
  -2  -6 -22 70.5415 113.827   4
   2   6  22 128.530 126.277   1
   2   6  22-38.8590 129.701   2
  -2  -6 -23-52.5520 130.685   4
   2   6  23 232.131 148.400   1
   2   6  23 193.283 131.112   2
  -2  -6 -24 76.2732 156.426   4
   2   6  24-139.009 140.327   1
   2   6  24-33.5264 107.644   2
   2   6  25 50.4979 144.498   1
   2   6  25 75.8238 139.456   2
   2   7 -18 110.981 146.528   2
   2   7 -18 259.457 158.152   3
   2   7 -17 103.135 133.592   2
   2   7 -17-79.1432 136.902   3
   2   7 -16 897.304 223.555   2
  -2  -7  16 848.242 223.203   1
   2   7 -16 972.274 216.542   3
   2   7 -15 149.974 133.990   2
  -2  -7  15 18.5468 117.905   1
   2   7 -15 410.401 161.968   3
   2   7 -14 123.616 130.255   2
  -2  -7  14 244.130 167.979   1
   2   7 -14 260.071 127.894   3
  -2  -7  13 520.689 190.025   1
   2   7 -13 213.864 149.627   2
   2   7 -13 511.321 148.658   3
   2   7 -12-14.5325 112.937   2
  -2  -7  12 222.095 123.360   1
   2   7 -12 256.891 121.125   3
  -2  -7  11 22.8018 106.229   1
   2   7 -11 153.392 107.307   3
   2   7 -11-27.6046 124.515   2
   2   7 -10 2449.54 260.473   3
  -2  -7  10 2103.23 296.852   1
   2   7 -10 2139.17 300.114   2
  -2  -7   9 343.630 134.753   1
   2   7  -9 142.203 85.8705   3
   2   7  -9 201.485 129.476   2
  -2  -7   8-220.929 139.982   1
   2   7  -8-12.3238 81.0737   3
   2   7  -8 65.9982 122.468   2
   2   7  -7 3920.31 367.863   2
  -2  -7   7 3439.61 356.759   1
   2   7  -7 3082.26 264.414   3
  -2  -7   7 2965.75 233.382   4
  -2  -7   6 168.633 87.6984   4
   2   7  -6 192.534 123.544   2
  -2  -7   6 286.871 124.823   1
   2   7  -6 116.700 75.9775   3
   2   7  -5-38.3664 77.6627   3
  -2  -7   5 114.967 108.233   1
   2   7  -5 69.5455 101.217   2
  -2  -7   5 142.740 87.3951   4
  -2  -7   4 1088.26 206.189   1
   2   7  -4 686.875 120.571   3
  -2  -7   4 921.541 148.952   4
   2   7  -4 928.692 199.051   2
  -2  -7   3 1477.02 222.005   1
   2   7  -3 1465.36 233.840   2
   2   7  -3 1649.49 171.138   3
  -2  -7   3 1899.71 202.099   4
  -2  -7   2 191.206 92.8000   1
  -2  -7   2 308.934 104.322   4
   2   7  -2 214.759 113.844   2
   2   7  -2 176.111 74.8150   3
  -2  -7   1-164.515 117.037   1
   2   7  -1 96.8230 87.8186   2
  -2  -7   1 88.2897 90.1548   4
   2   7  -1-36.6796 51.1490   3
  -2  -7   0 5784.71 408.033   1
   2   7   0 5073.75 237.853   3
  -2  -7   0 5020.25 336.928   4
   2   7   0 5418.96 414.986   2
  -2  -7  -1 180.828 90.1717   4
   2   7   1-14.3119 91.0911   2
  -2  -7  -1-6.78920 77.1858   1
   2   7   1 103.203 58.3531   3
  -2  -7  -2 503.437 132.287   4
   2   7   2 744.461 173.582   2
  -2  -7  -2 693.227 167.494   1
   2   7   2 481.506 73.0426   3
  -2  -7  -3 296.331 114.631   4
   2   7   3 206.758 130.725   2
  -2  -7  -3 400.654 130.102   1
   2   7   4 591.244 170.233   2
  -2  -7  -4 1080.38 190.104   1
  -2  -7  -4 924.117 171.223   4
  -2  -7  -5 520.456 133.542   4
   2   7   5 475.657 143.996   2
  -2  -7  -5 578.434 147.931   1
  -2  -7  -6 705.395 146.774   4
   2   7   6 1196.63 196.660   2
  -2  -7  -6 1059.82 188.384   1
  -2  -7  -7 1948.72 245.855   1
   2   7   7 2269.54 266.682   2
  -2  -7  -7 2121.98 253.756   4
   2   7   8 1566.51 234.422   2
  -2  -7  -8 1471.43 227.877   1
  -2  -7  -8 1400.67 213.689   4
   2   7   9 773.960 163.351   1
  -2  -7  -9 828.717 182.056   4
   2   7   9 671.633 158.995   2
  -2  -7 -10 1705.99 244.947   4
   2   7  10 1690.09 244.733   1
   2   7  10 1313.66 210.923   2
   2   7  11 283.170 113.540   1
  -2  -7 -11 51.4914 99.0900   4
   2   7  11 65.9321 109.176   2
  -2  -7 -12 4930.72 406.031   4
   2   7  12 4792.73 390.395   2
   2   7  12 5607.83 432.730   1
   2   7  13 703.947 171.761   1
  -2  -7 -13 495.683 144.851   4
   2   7  13 747.485 175.586   2
  -2  -7 -14 1149.09 210.994   4
   2   7  14 777.292 190.748   2
   2   7  14 1301.88 233.539   1
  -2  -7 -15 5633.98 459.673   4
   2   7  15 5598.49 428.912   2
   2   7  15 5391.37 437.537   1
  -2  -7 -16 2468.38 312.702   4
   2   7  16 2409.46 292.910   2
   2   7  16 1993.39 274.198   1
  -2  -7 -17 602.052 183.716   4
   2   7  17 419.786 164.613   1
   2   7  17 106.734 104.016   2
  -2  -7 -18 212.412 139.790   4
   2   7  18 238.635 131.307   1
   2   7  18 119.213 111.824   2
  -2  -7 -19 131.696 135.959   4
   2   7  19-31.3693 131.940   1
   2   7  19 218.567 141.012   2
  -2  -7 -20 182.594 157.594   4
   2   7  20-81.5754 116.811   1
   2   7  20 142.270 125.945   2
  -2  -7 -21-13.5807 138.363   4
   2   7  21 107.288 111.245   1
   2   7  21 136.063 131.067   2
  -2  -7 -22 471.831 187.169   4
   2   7  22 147.947 147.682   1
   2   7  22 357.482 148.369   2
   2   7  23 93.8119 133.678   1
   2   7  23 52.6035 121.200   2
   2   7  24 376.287 188.884   1
   2   7  24 96.4003 133.112   2
   2   8 -14 1212.45 274.674   2
   2   8 -14 1081.99 221.260   3
  -2  -8  13-148.656 141.555   1
   2   8 -13-118.615 132.122   3
   2   8 -13 186.502 142.870   2
   2   8 -12 13.9896 138.517   2
  -2  -8  12 112.030 151.332   1
   2   8 -12 362.137 156.986   3
   2   8 -11 126.528 150.060   2
  -2  -8  11 103.352 145.088   1
   2   8 -11 57.8547 105.257   3
   2   8 -10 1221.03 252.615   2
   2   8 -10 1614.34 226.784   3
  -2  -8  10 1026.52 223.051   1
   2   8  -9 107.586 140.291   2
  -2  -8   9-214.132 160.988   1
   2   8  -8 99.7813 128.670   2
  -2  -8   8 306.532 167.030   1
  -2  -8   7 4842.61 445.600   1
   2   8  -7 4613.97 439.029   2
   2   8  -6 38.1724 104.567   2
  -2  -8   6 259.983 137.362   1
   2   8  -5 933.262 216.534   2
  -2  -8   5 820.150 150.038   4
  -2  -8   5 717.646 196.580   1
  -2  -8   4 6622.91 497.419   1
   2   8  -4 7924.75 543.445   2
  -2  -8   4 6843.93 399.972   4
  -2  -8   3 162.182 130.857   1
  -2  -8   3 184.290 96.5354   4
   2   8  -3-61.9276 107.628   2
  -2  -8   2 305.871 111.612   4
   2   8  -2 318.421 132.541   2
  -2  -8   2 560.877 163.836   1
   2   8  -1 290.040 133.654   2
  -2  -8   1 501.161 154.798   1
  -2  -8   1 472.357 134.581   4
   2   8   0 926.389 205.299   2
  -2  -8   0 1033.66 189.052   1
  -2  -8   0 1318.95 193.769   4
  -2  -8  -1 741.636 152.267   4
   2   8   1 460.107 149.084   2
  -2  -8  -1 927.859 193.642   1
  -2  -8  -2 2085.70 267.943   1
   2   8   2 2239.03 304.744   2
  -2  -8  -2 2408.08 262.838   4
  -2  -8  -3 442.455 132.550   4
   2   8   3 494.719 152.664   2
  -2  -8  -3 189.129 122.645   1
  -2  -8  -4-19.6591 88.5699   1
   2   8   4 84.9473 121.121   2
  -2  -8  -4-62.5774 92.3928   4
  -2  -8  -5 426.340 137.631   4
   2   8   5 783.437 187.014   2
  -2  -8  -5 486.843 149.776   1
   2   8   6 798.097 209.507   2
  -2  -8  -6 614.031 171.727   4
  -2  -8  -6 450.677 135.357   1
  -2  -8  -7 450.869 151.009   4
   2   8   7 568.168 186.310   2
  -2  -8  -7 436.559 137.714   1
  -2  -8  -8 233.998 125.599   4
   2   8   8 286.957 151.714   2
  -2  -8  -8 252.830 116.154   1
   2   8   9 1900.58 271.628   2
  -2  -8  -9 1992.23 271.630   4
   2   8  10 115.040 107.880   1
  -2  -8 -10 89.7727 99.2409   4
   2   8  10 165.578 111.937   2
   2   8  11 339.892 154.349   1
  -2  -8 -11 294.511 162.999   4
   2   8  11 262.629 113.331   2
   2   8  12 107.793 126.621   1
  -2  -8 -12 224.620 140.051   4
   2   8  12 230.620 110.114   2
   2   8  13 57.9285 124.896   1
  -2  -8 -13-174.449 156.214   4
   2   8  13-253.863 158.175   2
   2   8  14 275.629 122.280   1
   2   8  14 163.128 116.147   2
  -2  -8 -14 90.2196 108.567   4
  -2  -8 -15 2615.75 341.623   4
   2   8  15 3167.14 351.103   2
   2   8  15 2835.10 336.893   1
  -2  -8 -16 95.2787 139.670   4
   2   8  16 150.410 127.218   1
   2   8  16 134.077 109.652   2
  -2  -8 -17 407.262 193.752   4
   2   8  17 205.903 121.920   1
   2   8  17 376.620 154.425   2
  -2  -8 -18 983.053 244.161   4
   2   8  18 420.556 154.619   1
   2   8  18 645.404 190.080   2
  -2  -8 -19 155.929 139.671   4
   2   8  19 24.0980 129.741   1
   2   8  19 251.926 149.905   2
  -2  -8 -20 68.7716 169.798   4
   2   8  20-120.510 140.863   1
   2   8  20-33.6675 140.063   2
   2   8  21 110.241 137.086   1
   2   8  21 149.684 139.787   2
   2   8  22 109.669 144.829   1
   2   8  22 528.932 188.801   2
   2   9 -10 289.657 178.445   2
   2   9  -9 732.400 217.962   2
  -2  -9   9-5.91905 133.900   1
  -2  -9   8 2117.41 330.054   1
   2   9  -8 2228.82 348.202   2
   2   9  -7 169.573 155.364   2
  -2  -9   7 41.8510 123.783   1
   2   9  -6 78.0486 122.164   2
  -2  -9   6-27.5190 126.663   1
  -2  -9   5 182.993 162.000   1
   2   9  -5 258.986 159.791   2
  -2  -9   4 235.273 120.483   1
   2   9  -4 271.434 134.241   2
  -2  -9   3 122.032 130.591   1
   2   9  -3-119.181 146.605   2
  -2  -9   2 37.9699 111.538   4
   2   9  -2 163.044 124.803   2
  -2  -9   2 20.9688 115.098   1
  -2  -9   1 991.240 194.732   4
   2   9  -1 1033.94 235.431   2
  -2  -9   1 703.237 191.347   1
  -2  -9   0 55.9206 96.8080   4
   2   9   0-138.180 119.302   2
  -2  -9   0-29.5463 109.232   1
  -2  -9  -1-95.0441 101.888   4
   2   9   1 79.6681 127.591   2
  -2  -9  -1 36.9170 100.230   1
  -2  -9  -2 3173.58 353.003   1
   2   9   2 2888.75 362.491   2
  -2  -9  -2 2708.37 305.355   4
  -2  -9  -3 178.859 122.218   4
   2   9   3 81.4650 109.346   2
  -2  -9  -3 35.0430 112.253   1
  -2  -9  -4 318.482 140.931   4
   2   9   4 402.272 164.213   2
  -2  -9  -4 443.259 165.001   1
   2   9   5 15.1596 112.322   2
  -2  -9  -5 51.6878 108.444   4
  -2  -9  -5 12.1210 107.824   1
  -2  -9  -6 804.091 195.072   4
   2   9   6 741.868 213.692   2
  -2  -9  -6 953.238 214.720   1
  -2  -9  -7 260.337 134.331   4
   2   9   7 515.597 190.802   2
  -2  -9  -7 572.946 166.402   1
  -2  -9  -8 648.367 187.743   4
   2   9   8 952.059 219.157   2
  -2  -9  -8 977.640 200.932   1
   2   9   9 1322.10 246.642   1
  -2  -9  -9 874.250 200.291   4
   2   9   9 1076.89 239.316   2
   2   9  10 43.3032 117.201   1
  -2  -9 -10-46.7932 108.013   4
   2   9  10 95.5072 122.730   2
   2   9  11 664.058 186.896   1
  -2  -9 -11 623.556 189.447   4
   2   9  11 608.100 187.708   2
   2   9  12 650.614 182.355   1
  -2  -9 -12 703.010 197.987   4
   2   9  12 314.951 181.722   2
   2   9  13 77.2118 118.548   1
  -2  -9 -13-9.23504 128.445   4
   2   9  13 228.665 164.499   2
  -2  -9 -14 371.692 186.383   4
   2   9  14 254.180 135.891   1
   2   9  14 479.767 190.176   2
  -2  -9 -15 138.046 135.516   4
   2   9  15 40.5921 122.156   2
   2   9  15 155.405 130.027   1
  -2  -9 -16-63.5763 162.509   4
   2   9  16 60.2330 108.195   1
   2   9  16 129.361 134.995   2
   2   9  17 28.8579 128.085   1
   2   9  17 244.189 148.334   2
   2   9  18 577.037 190.973   1
   2   9  18 353.478 162.932   2
   2   9  19 114.941 144.021   1
   2   9  20 317.432 171.252   1
  -2 -10   3 301.579 168.389   1
  -2 -10   2 3352.33 406.684   1
   2  10  -2 2891.60 398.830   2
   2  10  -1 9.58681 138.080   2
  -2 -10   1 376.246 154.994   1
  -2 -10   0 128.474 129.491   4
   2  10   0 210.156 150.898   2
  -2 -10   0 545.975 194.232   1
  -2 -10  -1 2489.01 348.559   1
   2  10   1 2628.08 369.449   2
  -2 -10  -2 143.469 143.300   1
  -2 -10  -2 142.747 145.613   4
   2  10   2-164.521 176.062   2
  -2 -10  -3 113.276 136.181   4
  -2 -10  -3-176.617 140.419   1
   2  10   3 128.530 125.266   2
  -2 -10  -4 157.246 152.047   4
   2  10   4 84.7376 155.490   2
  -2 -10  -4-42.6241 113.848   1
  -2 -10  -5 955.436 214.643   4
   2  10   5 1094.07 271.503   2
  -2 -10  -5 966.980 218.483   1
  -2 -10  -6 264.183 166.659   4
   2  10   6 102.570 138.468   2
  -2 -10  -6-6.87406 116.553   1
  -2 -10  -7 45.4824 118.240   4
  -2 -10  -7 237.634 154.701   1
   2  10   7 150.385 163.831   2
  -2 -10  -8 41.2691 132.714   4
   2  10   8 511.808 197.275   2
  -2 -10  -8 232.508 135.940   1
   2  10   9 88.5820 128.652   1
  -2 -10  -9 341.074 183.060   4
   2  10  10-108.648 143.195   1
  -2 -10 -10 46.2206 128.316   4
   2  10  10 135.264 149.417   2
   2  10  11 336.390 174.068   1
   2  10  11 486.634 197.894   2
  -2 -10 -11 77.3738 138.072   4
   2  10  12 418.260 189.278   1
  -2 -10 -12 365.264 174.772   4
   2  10  13-11.6271 136.849   1
   2  10  14 405.850 192.181   1
   2  10  15 286.440 158.706   1
   3 -10 -11 1408.79 273.280   3
   3 -10 -10-143.446 148.214   3
   3 -10  -9 132.725 159.857   3
  -3  10   7 225.800 175.841   2
  -3  10   7 158.698 139.550   3
  -3  10   6-297.668 174.465   2
  -3  10   6 183.969 145.964   3
  -3  10   5 219.548 168.686   2
  -3  10   5 208.417 144.447   3
  -3  10   4 12.7796 129.037   2
  -3  10   4-112.490 144.096   3
  -3  10   3-105.766 141.025   3
  -3  10   2 56.9916 145.999   2
  -3  10   2-109.181 134.833   3
  -3  10   1 0.86979 131.549   2
  -3  10   1 15.8078 124.167   3
  -3  10   0 135.094 135.810   2
  -3  10   0-224.084 164.428   3
  -3  10  -1-95.8462 145.061   2
  -3  10  -1 40.3146 139.293   3
  -3  10  -2 831.051 234.160   3
   3  -9 -17 440.317 189.547   3
   3  -9 -16-48.7055 142.807   3
   3  -9 -15 494.500 181.398   3
   3  -9 -14 569.928 218.290   3
   3  -9 -13 304.001 167.215   3
  -3   9  13 237.061 146.001   2
   3  -9 -13 298.690 158.343   4
   3  -9 -12 278.752 156.599   4
   3  -9 -12-145.524 146.518   3
  -3   9  12 14.3014 151.600   2
   3  -9 -11 206.765 144.066   3
  -3   9  11 531.840 189.330   2
   3  -9 -11 309.841 157.030   4
   3  -9 -10 162.620 145.519   4
   3  -9 -10 59.6636 131.252   3
  -3   9  10 89.0421 130.017   2
   3  -9  -9 194.005 166.248   4
  -3   9   9-53.2051 124.874   2
   3  -9  -8 231.377 159.346   4
  -3   9   8-14.8062 123.525   2
  -3   9   8 155.591 126.394   3
   3  -9  -7 515.019 176.332   4
  -3   9   7 408.324 167.539   2
  -3   9   7 690.131 194.640   3
   3  -9  -6 1079.71 242.458   4
  -3   9   6 1099.21 239.032   2
  -3   9   6 1329.30 248.526   3
   3  -9  -5 1142.15 247.655   4
  -3   9   5 756.626 211.074   2
  -3   9   5 919.401 211.859   3
   3  -9  -4 38.1271 122.319   4
  -3   9   4 55.9823 128.639   2
  -3   9   4 63.7115 110.373   3
   3  -9  -3 38.4245 119.284   4
  -3   9   3-183.242 136.413   2
  -3   9   3-90.1852 127.750   3
  -3   9   2 2059.96 302.802   2
  -3   9   2 2527.22 324.112   3
   3  -9  -2 2144.85 317.494   4
   3  -9  -1-9.28603 119.910   4
  -3   9   1-16.9393 108.293   2
  -3   9   1 78.8608 115.494   3
   3  -9   0 173.368 154.723   4
  -3   9   0 381.894 165.341   3
   3  -9   1 58.8946 142.382   4
  -3   9  -1-64.8773 97.5143   2
  -3   9  -1 128.265 116.480   3
   3  -9   2 822.235 223.622   4
  -3   9  -2 599.303 169.705   2
  -3   9  -2 717.937 201.415   3
   3  -9   3 59.9855 158.891   4
  -3   9  -3 237.176 153.052   2
  -3   9  -3 25.4978 124.437   3
  -3   9  -4 6653.82 537.694   3
   3  -9   4 6986.38 560.529   4
  -3   9  -5 2729.44 356.093   3
   3  -9   5 2318.24 339.974   4
   3  -9   6-3.27118 126.649   4
  -3   9  -6 80.4884 134.229   3
   3  -9   7 1265.54 265.718   4
  -3   9  -7 1795.23 317.742   3
   3  -9   8 134.426 169.579   4
  -3   9  -8 172.898 171.579   3
   3  -9   9 290.971 173.680   4
   3  -8 -19 1217.33 269.116   4
   3  -8 -19 1121.42 253.562   3
   3  -8 -18 1584.58 289.751   4
   3  -8 -18 1380.02 263.446   3
   3  -8 -17-4.82057 121.236   4
   3  -8 -17 218.468 155.489   3
  -3   8  17 442.935 201.873   2
   3  -8 -16 81.0443 141.204   4
   3  -8 -16-40.9168 122.617   3
  -3   8  16 2.86178 142.138   2
   3  -8 -15 689.086 196.682   4
   3  -8 -15 1016.69 219.289   3
  -3   8  15 1103.92 251.341   2
   3  -8 -14 35.3880 125.056   4
   3  -8 -14-50.6275 124.126   3
  -3   8  14-32.1826 109.895   2
   3  -8 -13 225.823 153.858   4
   3  -8 -13-73.1646 111.182   3
  -3   8  13 58.9115 114.801   2
   3  -8 -12 882.284 193.383   4
   3  -8 -12 818.942 196.988   3
  -3   8  12 1287.49 246.602   2
   3  -8 -11-62.8146 104.700   4
   3  -8 -11 98.9475 112.772   3
  -3   8  11 144.289 128.342   2
   3  -8 -10 79.3932 132.957   4
   3  -8 -10-89.3231 108.881   3
  -3   8  10 72.3314 112.904   2
   3  -8  -9 504.256 174.060   4
  -3   8   9 513.355 167.046   2
   3  -8  -8 33.3579 114.939   4
  -3   8   8-51.1218 120.209   2
  -3   8   8 204.529 142.725   3
   3  -8  -7-184.366 122.537   4
  -3   8   7 146.345 121.014   2
  -3   8   7-56.8791 106.330   3
   3  -8  -6 64.4095 102.289   4
  -3   8   6-118.672 130.934   2
  -3   8   6 220.677 127.817   3
   3  -8  -5 82.9225 100.286   4
  -3   8   5 60.0513 118.156   2
  -3   8   5 32.3635 88.3229   3
   3  -8  -4-40.5908 97.2328   4
  -3   8   4 119.806 104.150   2
  -3   8   4-41.4182 104.581   3
   3  -8  -3 550.774 170.478   4
  -3   8   3 660.556 171.558   2
  -3   8   3 482.326 159.903   3
   3  -8  -2 1375.71 242.793   4
  -3   8   2 1540.19 236.217   2
  -3   8   2 1669.27 255.570   3
   3  -8  -1 768.739 205.382   4
  -3   8   1 835.226 188.116   2
  -3   8   1 684.398 177.930   3
   3  -8   0 1229.37 231.946   4
  -3   8   0 1089.02 201.876   2
  -3   8   0 1229.60 222.593   3
  -3   8  -1 6666.98 453.966   2
  -3   8  -1 6249.85 479.363   3
   3  -8   1 5717.82 471.052   4
  -3   8  -2 1196.29 212.554   2
  -3   8  -2 1658.75 269.220   3
   3  -8   2 1738.66 270.590   4
   3  -8   3 1187.67 233.063   4
  -3   8  -3 1842.95 254.368   2
  -3   8  -3 1306.70 233.458   3
  -3   8  -4 6289.82 430.541   2
  -3   8  -4 6087.78 481.188   3
   3  -8   4 6549.40 511.414   4
   3  -8   5 122.193 119.176   4
  -3   8  -5 129.814 111.159   2
  -3   8  -5-41.8683 118.566   3
   3  -8   6 1223.78 241.209   4
  -3   8  -6 1032.86 232.945   3
   3  -8   7 1215.99 238.630   4
  -3   8  -7 2034.02 301.227   3
   3  -8   8 103.311 117.874   1
  -3   8  -8 181.687 138.021   3
   3  -8   8-94.4968 115.075   4
   3  -8   9 63.2492 106.184   1
  -3   8  -9-80.2288 127.605   3
   3  -8   9 199.316 159.920   4
   3  -8  10 155.230 128.872   1
  -3   8 -10 536.142 208.412   3
   3  -8  10 139.919 126.680   4
  -3   8 -11 3.81081 129.032   3
   3  -8  11 153.711 120.969   1
   3  -8  11 201.558 168.764   4
  -3   8 -12-120.450 159.298   3
   3  -8  12 113.250 153.788   4
   3  -8  12-51.3993 120.671   1
   3  -8  13 101.508 115.549   1
   3  -8  13 196.338 163.353   4
   3  -8  14-80.1521 146.014   1
   3  -8  14 361.219 187.967   4
   3  -8  15 297.165 180.954   1
   3  -7 -22 782.442 208.076   4
   3  -7 -21 168.995 142.099   4
   3  -7 -21 363.577 189.995   3
   3  -7 -20-139.316 123.449   4
   3  -7 -20 9.65230 128.457   3
  -3   7  20 34.6930 135.423   2
   3  -7 -19 750.923 195.771   4
   3  -7 -19 648.256 196.083   3
   3  -7 -18 333.872 165.429   4
   3  -7 -18 260.234 143.997   3
  -3   7  18 517.416 196.696   2
   3  -7 -17-42.5298 129.736   4
   3  -7 -17 494.309 198.000   3
  -3   7  17 340.102 186.491   2
   3  -7 -16-150.863 136.238   4
   3  -7 -16 29.4500 102.568   3
  -3   7  16 58.7198 110.496   2
   3  -7 -15 447.077 163.890   4
   3  -7 -15 320.666 158.065   3
  -3   7  15 550.850 196.165   2
   3  -7 -14 90.2449 113.565   4
   3  -7 -14 164.650 116.322   3
  -3   7  14 91.2091 133.927   2
   3  -7 -13 630.466 160.292   4
   3  -7 -13 268.640 124.606   3
  -3   7  13 346.337 167.446   2
   3  -7 -12 128.588 115.681   4
   3  -7 -12-66.9102 108.581   3
  -3   7  12 76.1483 138.866   2
   3  -7 -11 3.11037 104.930   4
   3  -7 -11 99.4087 141.525   3
  -3   7  11 84.7460 134.769   2
   3  -7 -10 259.648 129.285   4
   3  -7 -10-57.5920 111.533   3
  -3   7  10 93.4864 119.841   2
   3  -7  -9 647.855 169.117   4
  -3   7   9 548.345 151.870   2
   3  -7  -8 597.217 153.026   4
  -3   7   8 1064.98 208.363   2
  -3   7   8 683.764 162.209   3
  -3   7   7 1472.69 234.160   2
  -3   7   7 1740.96 239.594   3
   3  -7  -7 1702.48 245.090   4
  -3   7   6 2010.42 264.262   2
  -3   7   6 2016.82 250.003   3
   3  -7  -6 2015.39 268.332   4
  -3   7   5 39.6275 99.3357   2
  -3   7   5 155.424 96.9889   3
   3  -7  -5 163.505 112.512   4
   3  -7  -4 55.5211 84.4423   4
  -3   7   4 119.800 103.555   2
  -3   7   4-13.8359 80.2794   3
  -3   7   3 8319.68 490.692   2
   3  -7  -3 7844.71 503.297   4
  -3   7   3 8746.04 514.125   3
   3  -7  -2 62.5038 91.8032   4
  -3   7   2 236.203 106.692   2
  -3   7   2 186.531 122.055   3
   3  -7  -1 618.917 163.429   4
  -3   7   1 463.754 134.868   2
  -3   7   1 579.223 154.824   3
   3  -7   0 115.559 107.541   4
  -3   7   0 206.186 103.101   2
   3  -7   1 511.172 155.736   4
  -3   7  -1 605.079 149.522   2
   3  -7   1 490.899 100.217   1
  -3   7  -1 488.740 152.587   3
  -3   7  -2 1149.41 189.317   2
   3  -7   2 939.455 138.842   1
  -3   7  -2 1283.88 237.101   3
   3  -7   2 1148.56 227.679   4
  -3   7  -3 29210.1 842.484   2
  -3   7  -3 29940.7 983.241   3
   3  -7   3 27935.1 963.400   4
   3  -7   3 28325.1 717.067   1
  -3   7  -4 4149.40 322.427   2
  -3   7  -4 4901.44 419.018   3
   3  -7   4 3968.08 283.796   1
   3  -7   4 3799.39 360.310   4
   3  -7   5 221.336 107.865   1
  -3   7  -5 558.913 135.243   2
  -3   7  -5 103.923 121.067   3
   3  -7   5 271.325 130.906   4
  -3   7  -6 2624.12 257.403   2
  -3   7  -6 2620.53 306.029   3
   3  -7   6 2651.92 248.172   1
   3  -7   6 2407.02 302.060   4
  -3   7  -7 858.968 160.209   2
  -3   7  -7 680.846 182.194   3
   3  -7   7 1172.17 233.948   4
   3  -7   7 832.200 161.390   1
   3  -7   8 753.315 153.023   1
   3  -7   8 615.370 186.023   4
  -3   7  -8 795.580 207.670   3
  -3   7  -9 3583.31 386.753   3
   3  -7   9 3169.44 305.444   1
   3  -7   9 2935.90 341.368   4
  -3   7 -10 126.781 126.405   3
   3  -7  10 8.70219 87.2147   1
   3  -7  10 27.4971 105.427   4
   3  -7  11 447.155 143.799   1
   3  -7  11 155.643 112.424   4
  -3   7 -12 390.462 169.982   3
   3  -7  12 384.352 146.153   1
   3  -7  12 635.528 204.492   4
   3  -7  13 2353.20 323.552   4
  -3   7 -13 2412.78 343.641   3
   3  -7  13 1718.14 258.308   1
   3  -7  14 173.487 134.664   1
  -3   7 -14-14.3841 138.424   3
   3  -7  14 282.345 147.774   4
   3  -7  15 68.1078 125.251   1
  -3   7 -15-104.174 163.792   3
   3  -7  15 21.0326 113.858   4
   3  -7  16-190.648 148.804   4
   3  -7  16 62.1425 112.948   1
   3  -7  17 305.518 164.801   1
   3  -7  17 109.828 137.095   4
   3  -6 -23 285.634 168.331   3
   3  -6 -22 234.955 147.663   4
   3  -6 -22-54.2364 159.307   3
  -3   6  22-110.642 138.117   2
   3  -6 -21 143.484 123.685   4
   3  -6 -21 563.391 194.131   3
  -3   6  21 489.545 206.723   2
  -3   6  20 2091.99 325.738   2
   3  -6 -20 1968.86 306.592   3
   3  -6 -20 2107.01 283.691   4
   3  -6 -19 523.453 160.457   4
   3  -6 -19 444.538 182.156   3
  -3   6  19 169.191 139.326   2
   3  -6 -18-17.0377 92.0482   4
   3  -6 -18 74.0914 103.863   3
  -3   6  18-76.9768 126.561   2
   3  -6 -17 37.8999 93.1327   4
   3  -6 -17-7.17139 114.340   3
  -3   6  17 147.016 134.511   2
   3  -6 -16 657.150 156.738   4
   3  -6 -16 626.105 175.477   3
   3  -6 -15 389.951 149.424   3
  -3   6  15 479.828 166.582   2
   3  -6 -15 392.740 144.907   4
   3  -6 -14 983.017 204.093   3
  -3   6  14 1307.39 227.623   2
   3  -6 -14 1268.07 204.632   4
   3  -6 -13 292.682 130.401   3
  -3   6  13 424.744 156.475   2
   3  -6 -13 559.804 149.069   4
   3  -6 -12 205.944 106.420   4
   3  -6 -12 378.243 134.701   3
  -3   6  12 330.643 143.134   2
  -3   6  11 1443.76 223.906   2
   3  -6 -11 1649.55 248.997   3
   3  -6 -11 1534.64 224.129   4
   3  -6 -10 1597.60 238.393   3
  -3   6  10 1225.14 203.989   2
   3  -6 -10 1841.85 236.793   4
  -3   6   9 2156.23 270.203   2
   3  -6  -9 2546.82 273.266   4
   3  -6  -8 587.933 153.679   4
  -3   6   8 394.322 122.175   2
  -3   6   8 698.105 159.977   3
   3  -6  -7 46.8004 98.2481   4
  -3   6   7-27.0735 94.3473   2
  -3   6   7 1.70946 85.4447   3
   3  -6  -6 971.670 181.787   4
  -3   6   6 733.647 162.931   2
  -3   6   6 1061.97 182.490   3
   3  -6  -5-80.6388 86.0323   4
  -3   6   5 102.010 94.9454   2
  -3   6   5-4.19243 76.7319   3
  -3   6   4 3438.86 299.531   2
  -3   6   4 3529.30 309.103   3
   3  -6  -4 4064.31 343.850   4
   3  -6  -3 344.080 140.647   4
  -3   6   3 354.287 108.924   2
  -3   6   3 321.756 119.695   3
   3  -6  -3 337.760 57.5397   1
   3  -6  -2 601.958 152.802   4
   3  -6  -2 569.198 77.3523   1
  -3   6   2 661.643 150.190   2
  -3   6   2 409.684 116.395   3
  -3   6   1 2796.39 254.487   2
   3  -6  -1 2968.52 178.685   1
   3  -6  -1 2439.88 265.114   4
  -3   6   1 2658.38 274.731   3
  -3   6   0 2456.61 239.680   2
  -3   6   0 3221.52 305.263   3
   3  -6   0 2917.72 186.292   1
   3  -6   0 3042.78 306.240   4
  -3   6  -1 1810.92 203.378   2
  -3   6  -1 1644.01 229.919   3
   3  -6   1 1657.42 151.141   1
   3  -6   1 1631.87 223.360   4
   3  -6   2 448.472 88.2319   1
  -3   6  -2 341.969 116.100   2
  -3   6  -2 468.201 144.480   3
   3  -6   2 498.769 151.752   4
  -3   6  -3 5597.02 341.788   2
  -3   6  -3 4959.73 382.491   3
   3  -6   3 5118.79 283.931   1
   3  -6   3 5613.03 407.109   4
   3  -6   4 93.0472 85.1828   4
  -3   6  -4-0.80760 63.2279   2
  -3   6  -4 22.8068 85.3958   3
   3  -6   4 108.998 54.8928   1
  -3   6  -5 238.237 106.632   2
  -3   6  -5 56.5685 90.4627   3
   3  -6   5 192.638 76.8464   1
   3  -6   5 9.45564 92.4403   4
  -3   6  -6 4782.35 304.397   2
   3  -6   6 4334.78 363.180   4
  -3   6  -6 4642.55 385.177   3
   3  -6   6 4244.53 288.897   1
  -3   6  -7 48.2906 77.7183   2
   3  -6   7 85.2899 73.3131   1
  -3   6  -7 59.1379 93.4228   3
   3  -6   7 46.3333 96.4331   4
  -3   6  -8-7.36463 68.7715   2
   3  -6   8-145.437 94.3175   1
  -3   6  -8 42.7501 99.8097   3
   3  -6   8 77.9332 97.9247   4
  -3   6  -9 1850.12 189.961   2
   3  -6   9 1662.41 206.483   1
  -3   6  -9 2089.63 281.925   3
   3  -6   9 2102.48 274.242   4
   3  -6  10-18.1042 72.6493   1
  -3   6 -10 49.5239 103.911   3
   3  -6  10 85.2844 106.605   4
   3  -6  11 133.691 116.333   4
   3  -6  11 1.15251 90.1717   1
  -3   6 -11 223.056 138.481   3
   3  -6  12-17.9786 78.8818   1
  -3   6 -12 30.5416 104.766   3
   3  -6  12-74.2063 104.833   4
   3  -6  13 154.330 106.139   1
  -3   6 -13-33.2279 104.895   3
   3  -6  13 224.760 139.294   4
   3  -6  14 200.367 122.577   1
  -3   6 -14 78.3434 116.033   3
   3  -6  14 204.997 136.314   4
   3  -6  15 593.017 168.555   1
  -3   6 -15 404.426 167.384   3
   3  -6  15 906.552 211.905   4
   3  -6  16 1252.98 234.315   1
  -3   6 -16 984.329 237.339   3
   3  -6  16 804.733 215.744   4
   3  -6  17 477.583 173.151   1
  -3   6 -17 246.904 149.511   3
   3  -6  17 342.580 161.835   4
   3  -6  18 825.653 206.655   1
  -3   6 -18 1172.13 279.505   3
   3  -6  18 894.826 228.065   4
   3  -6  19 1364.16 266.410   1
   3  -6  19 1809.06 314.399   4
   3  -6  20 150.618 147.315   4
   3  -5 -24 455.634 192.227   3
   3  -5 -23 503.999 187.670   3
  -3   5  23 838.079 212.434   2
   3  -5 -22 131.270 121.869   4
   3  -5 -22 320.706 175.251   3
  -3   5  22-153.050 145.180   2
   3  -5 -21 327.745 148.306   4
   3  -5 -21 296.381 154.723   3
  -3   5  21 228.837 130.291   2
   3  -5 -20 104.337 106.484   4
   3  -5 -20 111.693 136.359   3
  -3   5  20 103.766 135.204   2
   3  -5 -19 210.636 123.628   4
   3  -5 -19 62.4403 110.556   3
  -3   5  19 98.1967 143.092   2
   3  -5 -18 221.532 104.475   4
   3  -5 -18 51.9823 95.7889   3
  -3   5  18 397.191 157.707   2
   3  -5 -17 199.732 96.6542   4
   3  -5 -17 218.902 127.390   3
  -3   5  17 56.2952 94.9960   2
   3  -5 -16-39.9364 90.8551   4
   3  -5 -16 111.230 90.4782   3
  -3   5  16 23.0185 107.699   2
   3  -5 -15 109.566 76.3422   4
   3  -5 -15 248.549 119.146   3
  -3   5  15 186.060 117.816   2
  -3   5  14 4550.15 385.648   2
   3  -5 -14 4416.04 377.435   3
   3  -5 -14 5138.98 362.365   4
  -3   5  13 1236.81 208.495   2
   3  -5 -13 1171.63 182.359   4
   3  -5 -12-43.3987 77.4795   4
   3  -5 -12 150.311 107.942   3
  -3   5  12 161.595 93.1842   2
  -3   5  11 1494.68 207.486   2
   3  -5 -11 2046.42 250.380   3
   3  -5 -11 1916.64 225.976   4
   3  -5 -10-19.5845 69.6069   4
   3  -5 -10 28.7258 83.1977   3
  -3   5  10 3.08103 77.8374   2
   3  -5  -9 76.7364 85.2258   4
   3  -5  -9 5.86337 94.8587   3
  -3   5   9 127.842 107.425   2
   3  -5  -8 87.3108 88.9483   4
  -3   5   8 162.593 117.861   2
  -3   5   8 229.532 112.027   3
   3  -5  -7 1540.67 197.650   4
  -3   5   7 1572.92 201.039   2
  -3   5   7 1508.03 196.358   3
   3  -5  -6 123.961 91.6684   4
  -3   5   6 120.574 88.1444   2
  -3   5   6 115.812 79.6237   3
   3  -5  -5 102.578 77.4911   4
  -3   5   5 208.569 103.941   2
  -3   5   5 114.043 96.9649   3
  -3   5   4 2288.92 230.900   2
  -3   5   4 2910.70 267.896   3
   3  -5  -4 2395.72 242.819   4
  -3   5   3 918.829 150.645   2
  -3   5   3 1051.52 169.119   3
   3  -5  -3 902.712 63.0445   1
  -3   5   3 743.282 61.0669   1
   3  -5  -3 1130.68 173.520   4
   3  -5  -2 505.208 58.4024   1
  -3   5   2 515.802 109.272   2
  -3   5   2 563.482 134.281   3
  -3   5   2 342.912 53.3813   1
   3  -5  -2 432.321 127.389   4
  -3   5   1 2660.88 227.322   2
  -3   5   1 3168.82 283.294   3
   3  -5  -1 2593.22 255.620   4
   3  -5  -1 2943.32 148.323   1
  -3   5   1 2321.63 135.424   1
  -3   5   0 108.080 75.9897   2
  -3   5   0 24.4218 44.9637   1
  -3   5   0 82.9140 85.2069   3
   3  -5   0 1.91569 37.0140   1
   3  -5   0 57.9127 83.9743   4
  -3   5  -1 1629.25 178.211   2
  -3   5  -1 1463.06 133.088   1
  -3   5  -1 1751.16 218.810   3
   3  -5   1 1753.94 139.230   1
   3  -5   1 1641.28 221.322   4
  -3   5  -2 27393.5 671.929   2
  -3   5  -2 26619.6 820.691   3
   3  -5   2 27659.6 556.993   1
   3  -5   2 26295.5 807.284   4
  -3   5  -3 3557.77 244.061   2
   3  -5   3 3518.26 214.136   1
  -3   5  -3 3726.46 315.983   3
   3  -5   3 3246.22 296.425   4
  -3   5  -4 16.9588 53.9681   2
   3  -5   4 127.258 65.3015   1
  -3   5  -4-18.0866 88.2200   3
   3  -5   4 80.2965 96.3905   4
   3  -5   5 915.197 130.570   1
  -3   5  -5 839.753 168.254   3
  -3   5  -5 827.329 122.989   2
   3  -5   5 565.963 139.562   4
  -3   5  -6 4231.29 255.675   2
   3  -5   6 4991.31 299.690   1
  -3   5  -6 5161.67 386.102   3
   3  -5   6 4398.42 357.305   4
  -3   5  -7 1848.89 165.334   2
   3  -5   7 1529.46 220.658   4
   3  -5   7 1611.67 180.360   1
  -3   5  -7 1864.76 241.948   3
  -3   5  -8 2919.10 207.854   2
   3  -5   8 3043.77 252.597   1
  -3   5  -8 2599.98 287.208   3
   3  -5   8 2820.15 287.468   4
  -3   5  -9 705.871 110.661   2
   3  -5   9 362.015 116.060   1
  -3   5  -9 632.116 146.162   3
   3  -5   9 642.188 169.156   4
  -3   5 -10 588.157 102.799   2
   3  -5  10 905.767 152.751   1
  -3   5 -10 630.027 160.833   3
   3  -5  10 663.024 152.758   4
   3  -5  11 869.557 154.994   1
  -3   5 -11 1107.29 194.161   3
   3  -5  11 1338.37 221.483   4
   3  -5  12 3814.61 324.519   1
  -3   5 -12 3092.15 338.327   3
   3  -5  12 4173.77 375.986   4
   3  -5  13 287.124 123.006   1
  -3   5 -13 241.352 144.859   3
   3  -5  13 113.160 122.484   4
   3  -5  14 992.673 187.677   1
  -3   5 -14 1258.09 233.481   3
   3  -5  14 686.432 184.205   4
   3  -5  15-32.1434 109.849   1
  -3   5 -15 96.4162 142.957   3
   3  -5  15 111.798 113.807   4
   3  -5  16-28.8301 93.7083   1
  -3   5 -16 37.0139 104.057   3
   3  -5  16 127.419 136.047   4
   3  -5  17 86.7901 125.087   1
  -3   5 -17 136.305 152.736   3
   3  -5  17-78.9660 120.314   4
   3  -5  18 1882.76 289.633   4
   3  -5  18 2500.35 322.668   1
  -3   5 -18 1627.06 284.114   3
   3  -5  19 166.941 124.432   4
   3  -5  19 91.4149 116.612   1
  -3   5 -19-53.0270 126.037   3
   3  -5  20-14.0995 113.561   1
  -3   5 -20 93.1696 143.478   3
   3  -5  20 96.5146 153.810   4
   3  -5  21 1352.39 250.806   4
   3  -5  21 1210.33 248.236   1
   3  -5  22 449.843 186.772   4
   3  -4 -24-133.356 122.702   3
  -3   4  24-94.1002 147.831   2
   3  -4 -23-17.0093 124.178   3
  -3   4  23-96.3875 112.772   2
   3  -4 -22 227.782 153.785   3
  -3   4  22 271.134 150.966   2
   3  -4 -21 930.237 174.433   4
   3  -4 -21 980.498 226.807   3
  -3   4  21 1133.11 253.661   2
   3  -4 -20 8.38793 92.8471   4
   3  -4 -20 73.4947 99.5392   3
  -3   4  20 100.354 117.800   2
   3  -4 -19-49.0113 79.3957   4
   3  -4 -19 249.066 129.959   3
  -3   4  19 89.1993 134.587   2
   3  -4 -18 101.389 82.1552   4
   3  -4 -18-45.4330 110.235   3
  -3   4  18-73.4123 93.9381   2
   3  -4 -17 3109.61 322.938   3
  -3   4  17 2901.17 316.941   2
   3  -4 -17 3269.38 281.441   4
   3  -4 -16 495.855 119.462   4
   3  -4 -16 764.878 179.739   3
  -3   4  16 575.626 156.801   2
  -3   4  15 1506.32 224.778   2
   3  -4 -15 976.928 186.419   3
   3  -4 -15 1397.08 186.965   4
  -3   4  14 2245.75 262.823   2
   3  -4 -14 2516.61 274.990   3
   3  -4 -14 2611.21 238.284   4
   3  -4 -13 539.706 119.986   4
   3  -4 -13 472.498 132.501   3
  -3   4  13 491.483 131.154   2
  -3   4  12 3191.51 302.599   2
   3  -4 -12 3216.72 302.682   3
   3  -4 -12 3554.03 271.991   4
   3  -4 -11 427.669 127.342   3
  -3   4  11 485.710 131.687   2
   3  -4 -11 390.489 104.489   4
   3  -4 -10 4616.74 358.564   3
   3  -4 -10 4975.09 318.187   4
  -3   4  10 4340.75 329.335   2
  -3   4   9 1993.90 224.990   2
   3  -4  -9 1957.35 230.384   3
   3  -4  -9 1798.29 195.618   4
   3  -4  -8 154.046 64.5167   4
  -3   4   8 90.9110 80.6237   2
  -3   4   7 4673.39 312.095   2
   3  -4  -7 5267.24 322.362   4
  -3   4   7 4915.80 331.585   3
   3  -4  -6 209.601 76.7894   4
  -3   4   6 17.1611 69.6048   2
  -3   4   6 350.747 117.416   3
  -3   4   5 8279.64 397.281   2
  -3   4   5 8606.32 428.118   3
   3  -4  -5 8083.32 399.609   4
  -3   4   4 818.907 132.511   2
  -3   4   4 643.762 139.402   3
   3  -4  -4 834.113 143.104   4
  -3   4   3 70.8409 67.5110   2
  -3   4   3-28.6254 77.9430   3
   3  -4  -3 0.41158 75.7948   4
  -3   4   2 5007.34 287.897   2
   3  -4  -2 3304.65 99.5526   1
  -3   4   2 4483.91 311.984   3
   3  -4  -2 4238.17 297.077   4
  -3   4   2 3412.13 104.899   1
  -3   4   1 1657.59 168.927   2
  -3   4   1 1728.82 194.006   3
   3  -4  -1 1859.77 208.587   4
   3  -4  -1 1665.06 91.6661   1
  -3   4   1 1537.18 91.9521   1
  -3   4   0 152.811 41.0408   1
  -3   4   0 97.9230 55.6711   2
  -3   4   0 229.035 102.279   3
   3  -4   0 279.240 54.5989   1
   3  -4   0 175.700 92.3346   4
  -3   4  -1 93.0420 48.2203   1
  -3   4  -1 0.28182 53.4892   2
   3  -4   1 68.0728 40.8720   1
  -3   4  -1 19.5192 76.1327   3
   3  -4   1 63.8686 62.3533   4
  -3   4  -2 546.114 95.0546   2
   3  -4   2 672.040 86.9418   1
  -3   4  -2 643.217 89.5727   1
   3  -4   2 804.757 147.093   4
   3  -4   3 352.058 79.9133   2
   3  -4   3 418.991 76.8900   1
  -3   4  -3 413.548 86.6590   2
  -3   4  -3 489.765 84.5401   1
  -3   4  -3 492.775 137.219   3
   3  -4   3 230.932 89.5779   4
  -3   4  -4 1691.34 148.308   2
   3  -4   4 1763.50 147.310   1
  -3   4  -4 1678.40 206.724   3
   3  -4   4 1550.17 200.762   4
   3  -4   4 1577.35 141.842   2
  -3   4  -5 817.412 102.767   2
   3  -4   5 779.515 110.868   1
   3  -4   5 819.245 104.918   2
   3  -4   5 788.990 152.591   4
  -3   4  -5 917.817 156.670   3
  -3   4  -6 2268.45 161.157   2
   3  -4   6 2055.44 186.832   1
  -3   4  -6 2370.97 256.705   3
   3  -4   6 2312.21 246.501   4
   3  -4   6 2016.30 147.717   2
  -3   4  -7 1844.25 142.618   2
   3  -4   7 1945.50 140.534   2
   3  -4   7 1723.01 174.979   1
   3  -4   7 1940.39 224.767   4
  -3   4  -7 2161.97 241.841   3
  -3   4  -8 1222.68 117.376   2
   3  -4   8 860.723 159.188   4
   3  -4   8 894.434 134.783   1
  -3   4  -8 1080.23 171.875   3
   3  -4   8 940.308 100.981   2
  -3   4  -9 1755.88 132.428   2
   3  -4   9 1786.23 188.494   1
  -3   4  -9 1390.41 205.331   3
   3  -4   9 1540.70 211.619   4
  -3   4 -10 637.447 83.1245   2
   3  -4  10 432.908 111.734   1
  -3   4 -10 619.271 152.218   3
   3  -4  10 513.389 146.041   4
   3  -4  11 303.180 111.589   1
  -3   4 -11 100.709 45.8702   2
  -3   4 -11 87.3737 97.4182   3
   3  -4  11 19.4283 89.6677   4
   3  -4  12 598.634 136.185   1
  -3   4 -12 861.457 182.997   3
   3  -4  12 584.177 156.946   4
   3  -4  13 101.006 91.1556   1
  -3   4 -13-6.88937 88.7972   3
   3  -4  13-111.163 121.715   4
   3  -4  14 2194.96 249.385   1
  -3   4 -14 1807.09 255.116   3
   3  -4  14 1895.97 255.400   4
   3  -4  15 153.698 92.8386   1
  -3   4 -15-59.5431 107.709   3
   3  -4  15-107.143 99.5239   4
   3  -4  16 535.403 148.806   1
  -3   4 -16 655.394 158.128   3
   3  -4  16 582.009 174.122   4
   3  -4  17 1041.49 201.660   1
  -3   4 -17 1139.13 222.029   3
   3  -4  17 1451.40 245.531   4
  -3   4 -18 1712.80 274.998   3
   3  -4  18 1601.50 247.460   1
   3  -4  18 1399.90 234.239   4
   3  -4  19 348.592 148.944   1
   3  -4  19 634.886 190.764   4
  -3   4 -19 662.220 195.688   3
   3  -4  20 267.602 161.583   1
  -3   4 -20 333.693 184.264   3
   3  -4  20 126.892 120.149   4
   3  -4  21 2803.70 359.084   1
  -3   4 -21 3320.21 404.028   3
   3  -4  21 2931.59 365.404   4
   3  -4  22 242.903 149.345   1
  -3   4 -22-136.430 176.972   3
   3  -4  22 231.373 155.488   4
   3  -4  23 266.718 157.015   4
   3  -4  24 1216.83 267.973   4
   3  -3 -25 1159.48 269.172   3
  -3   3  25 907.301 228.303   2
   3  -3 -24 496.596 190.139   3
  -3   3  24 522.843 189.655   2
   3  -3 -23 485.808 184.722   3
  -3   3  23 394.441 157.958   2
   3  -3 -22 860.247 214.149   3
  -3   3  22 908.787 216.933   2
   3  -3 -21 2258.21 302.424   3
  -3   3  21 2693.47 327.922   2
   3  -3 -20 199.453 85.3728   4
   3  -3 -20 130.891 135.520   3
  -3   3  20 110.147 98.7688   2
   3  -3 -19 22.6250 68.6267   4
   3  -3 -19-48.1667 95.3845   3
  -3   3  19-14.7569 93.2390   2
   3  -3 -18 356.838 100.368   4
   3  -3 -18 114.106 93.0472   3
  -3   3  18 246.773 124.096   2
   3  -3 -17 1055.31 214.253   3
  -3   3  17 1296.98 213.482   2
  -3   3  17 980.191 124.241   1
   3  -3 -17 1205.96 165.464   4
   3  -3 -16 2189.84 267.841   3
  -3   3  16 1746.44 149.960   1
   3  -3 -16 2017.12 200.318   4
   3  -3 -15 10479.6 550.092   3
  -3   3  15 10929.7 560.805   2
  -3   3  15 11508.2 351.341   1
   3  -3 -15 11246.0 450.000   4
   3  -3 -14 5627.18 388.617   3
  -3   3  14 5092.26 369.000   2
  -3   3  14 5599.53 225.648   1
   3  -3 -14 5598.45 317.320   4
   3  -3 -13 263.618 121.803   3
   3  -3 -13 247.436 86.0912   4
  -3   3  13 154.605 46.8729   1
  -3   3  13 164.592 96.3309   2
   3  -3 -12 9513.19 487.538   3
  -3   3  12 9162.08 468.457   2
  -3   3  12 9338.64 237.890   1
   3  -3 -12 10132.5 408.282   4
  -3   3  11 5920.10 371.722   2
   3  -3 -11 5936.42 380.910   3
  -3   3  11 5716.72 158.601   1
   3  -3 -11 6256.61 317.713   4
  -3   3  11 5500.62 161.236   1
  -3   3  10 1647.88 199.319   2
   3  -3 -10 2086.32 228.976   3
   3  -3 -10 2086.34 189.252   4
   3  -3  -9 2371.41 198.942   4
  -3   3   9 2277.36 223.765   2
   3  -3  -9 2434.47 245.858   3
   3  -3  -8 485.475 99.0900   4
   3  -3  -8 543.117 127.793   3
  -3   3   8 416.572 96.9165   2
   3  -3  -7 327.073 92.7224   4
   3  -3  -7 339.053 121.554   3
  -3   3   7 383.921 97.3318   2
   3  -3  -6 112.319 77.0154   4
  -3   3   6-26.1331 68.3489   2
  -3   3   6-7.37323 70.5509   3
  -3   3   5 4468.84 270.561   2
   3  -3  -5 4313.17 266.014   4
  -3   3   4 1476.40 156.102   2
   3  -3  -4 1512.39 167.798   4
  -3   3   4 1452.70 170.746   3
  -3   3   3 295.630 85.4333   2
  -3   3   3 137.289 69.4132   3
   3  -3  -3 443.760 95.2581   4
  -3   3   2 14732.0 443.404   2
   3  -3  -2 14887.5 505.595   4
  -3   3   1-16.2005 54.5704   2
   3  -3  -1 45.7918 20.2362   1
  -3   3   1 21.0970 61.1793   3
  -3   3   1 59.6935 22.8605   1
   3  -3  -1 2.65971 57.4437   4
  -3   3   0 33.7852 28.5425   1
   3  -3   0 48.7118 45.8726   2
   3  -3   0 84.0612 31.5953   1
  -3   3   0-0.59725 43.9137   2
  -3   3   0-0.57426 66.5325   3
   3  -3   0 83.0796 65.1069   4
   3  -3   1 58.7054 34.9999   1
   3  -3   1 31.9566 45.0524   2
  -3   3  -1 38.4011 29.9576   1
  -3   3  -1 0.32913 43.9855   2
   3  -3   1 141.409 91.8628   4
   3  -3   2 34.6895 31.5942   1
   3  -3   2 50.6766 53.4412   2
  -3   3  -2 72.3356 44.7059   1
  -3   3  -2 23.2615 47.1212   2
  -3   3  -2-0.58917 60.2536   3
   3  -3   2-6.67693 73.3317   4
   3  -3   3 180.475 51.1351   1
   3  -3   3 212.095 54.3902   2
  -3   3  -3 134.611 49.2098   1
  -3   3  -3 136.567 47.9011   2
  -3   3  -3 259.560 86.3419   3
   3  -3   3 216.318 95.8546   4
   3  -3   4 1990.52 203.962   4
  -3   3  -4 1892.88 125.467   2
   3  -3   4 1562.57 132.208   1
  -3   3  -4 2032.95 205.394   3
   3  -3   4 1882.39 124.959   2
  -3   3  -4 1559.39 138.595   1
  -3   3  -5 7913.40 238.319   2
   3  -3   5 7051.64 290.266   1
   3  -3   5 7068.54 382.058   4
  -3   3  -5 7076.94 383.967   3
   3  -3   5 7198.98 225.218   2
   3  -3   6 323.160 55.1630   2
  -3   3  -6 306.152 51.9511   2
  -3   3  -6 453.828 118.242   3
   3  -3   6 400.259 116.265   4
   3  -3   6 289.679 76.1859   1
  -3   3  -7 45.3815 28.4106   2
  -3   3  -7-14.7030 65.6541   3
   3  -3   7-8.17119 72.1042   4
   3  -3   7-14.5282 26.4131   2
   3  -3   7 3.15854 47.9139   1
  -3   3  -8-7.09202 23.1308   2
  -3   3  -8-112.167 97.2327   3
   3  -3   8 64.7687 54.1315   1
  -3   3  -8 50.5496 27.8686   2
   3  -3   8 166.884 94.4897   4
  -3   3  -9 237.932 37.8928   2
  -3   3  -9 252.550 38.4259   2
  -3   3  -9 266.731 104.144   3
   3  -3   9 153.732 87.6483   4
   3  -3   9 253.595 78.0162   1
  -3   3 -10 409.926 45.2214   2
   3  -3  10 692.693 157.442   4
  -3   3 -10 366.410 41.0468   2
  -3   3 -10 590.347 138.041   3
   3  -3  10 305.484 94.7480   1
   3  -3  11 722.545 156.450   4
  -3   3 -11 713.205 54.4226   2
  -3   3 -11 747.193 159.459   3
   3  -3  11 788.161 140.771   1
  -3   3 -12 172.324 28.8208   2
  -3   3 -12 402.921 117.330   3
   3  -3  12 521.467 147.813   4
   3  -3  12 515.023 131.162   1
  -3   3 -13 756.099 168.817   3
   3  -3  13 620.507 152.813   4
   3  -3  13 540.626 116.714   1
   3  -3  14 1218.45 185.436   1
  -3   3 -14 1220.86 211.886   3
   3  -3  14 1432.14 222.606   4
   3  -3  15 516.105 130.862   1
  -3   3 -15 449.006 127.489   3
   3  -3  15 612.502 162.624   4
   3  -3  16 462.728 138.589   1
  -3   3 -16 234.757 120.457   3
   3  -3  16 196.460 126.152   4
   3  -3  17 689.067 172.254   1
   3  -3  17 545.622 164.978   4
  -3   3 -17 665.254 166.242   3
   3  -3  18-119.718 119.925   1
  -3   3 -18 108.035 110.513   3
   3  -3  18-40.8238 102.476   4
   3  -3  19 457.360 168.751   1
  -3   3 -19 350.641 158.617   3
   3  -3  19 253.517 133.457   4
   3  -3  20 4336.96 405.206   4
   3  -3  20 2959.24 336.759   1
  -3   3 -20 3699.47 396.201   3
   3  -3  21 793.824 194.828   1
  -3   3 -21 1099.73 234.290   3
   3  -3  21 785.472 193.027   4
   3  -3  22 72.1365 116.801   1
  -3   3 -22 71.8900 119.628   3
   3  -3  22 94.6064 122.694   4
   3  -3  23 61.7972 113.619   1
  -3   3 -23-13.1855 123.531   3
  -3   3 -24 1143.06 265.842   3
   3  -3  24 735.209 215.625   1
   3  -3  24 1244.40 266.509   4
   3  -3  25 10.9542 140.132   4
   3  -2 -25 54.0348 148.544   3
  -3   2  25-47.1048 129.168   2
   3  -2 -24 47.0854 143.589   3
  -3   2  24-39.0553 111.295   2
   3  -2 -23-145.188 156.054   3
  -3   2  23 201.787 142.316   2
   3  -2 -22-250.115 134.372   3
  -3   2  22-53.7873 126.252   2
   3  -2 -21 53.8706 104.079   3
  -3   2  21 88.6541 107.032   2
  -3   2  20 123.125 88.0714   1
   3  -2 -20 229.308 130.418   3
  -3   2  20 1.09002 100.950   2
  -3   2  19 76.0281 72.8999   1
   3  -2 -19 74.7822 94.8959   3
  -3   2  19 59.1801 101.597   2
   3  -2 -18-0.16635 68.1527   4
  -3   2  18-43.0887 57.7848   1
   3  -2 -18 12.3308 90.9263   3
  -3   2  18-25.3368 107.296   2
   3  -2 -17 74.6721 67.4600   4
   3  -2 -17 147.410 98.5669   3
  -3   2  17 72.7783 67.9006   1
  -3   2  17-23.7928 100.892   2
   3  -2 -16-4.60507 61.1764   4
   3  -2 -16-53.6906 114.518   3
  -3   2  16 114.893 64.3905   1
  -3   2  16 158.807 103.017   2
   3  -2 -15 65.4203 52.1779   4
   3  -2 -15-2.79761 80.0743   3
  -3   2  15-29.8067 45.4910   1
  -3   2  15 173.079 112.608   2
   3  -2 -14 20.7354 54.8414   4
   3  -2 -14 4.52196 89.4846   3
  -3   2  14 198.655 64.9945   1
  -3   2  14 26.5881 85.5865   2
   3  -2 -13 255.696 70.4130   4
   3  -2 -13 230.833 65.2675   1
   3  -2 -13 278.323 101.057   3
  -3   2  13 135.743 49.9768   1
  -3   2  13 390.980 116.957   2
   3  -2 -12 131.546 66.1514   4
   3  -2 -12 188.424 59.9437   1
   3  -2 -12 95.7865 79.6631   3
  -3   2  12-22.3641 78.5673   2
  -3   2  12 188.633 53.5173   1
   3  -2 -11 307.496 79.3866   4
   3  -2 -11 290.321 60.7069   1
   3  -2 -11 221.909 97.5050   3
  -3   2  11 435.686 117.804   2
  -3   2  11 220.819 50.0320   1
   3  -2 -10-4.16131 44.6065   4
   3  -2 -10 53.4651 37.1588   1
   3  -2 -10-50.5783 68.4437   3
  -3   2  10-12.2993 77.4656   2
  -3   2  10-42.9668 37.8199   1
   3  -2  -9 356.180 79.4359   4
   3  -2  -9 329.209 109.676   3
   3  -2  -9 375.395 48.5206   1
  -3   2   9 474.826 108.998   2
  -3   2   9 413.427 49.1451   1
  -3   2   8 1401.50 72.0692   1
   3  -2  -8 1575.58 181.020   3
  -3   2   8 1299.36 162.833   2
   3  -2  -8 1241.91 67.2150   1
   3  -2  -8 1320.54 134.032   4
   3  -2  -7 75.3839 59.6959   4
   3  -2  -7-38.4785 62.5316   3
  -3   2   7-58.6624 62.3015   2
  -3   2   6 3831.48 247.698   2
   3  -2  -6 3960.99 265.516   3
   3  -2  -6 3857.94 219.873   4
  -3   2   5 699.962 111.377   2
  -3   2   5 816.792 126.869   3
   3  -2  -5 792.110 108.927   4
  -3   2   4 70.6486 56.4965   2
  -3   2   4 39.1915 76.6324   3
   3  -2  -4 31.3226 53.5102   4
  -3   2   3 3069.21 194.199   2
  -3   2   3 2663.23 211.772   3
   3  -2  -3 3285.71 214.243   4
   3  -2  -2 4849.81 238.544   2
  -3   2   2 4762.84 233.019   2
  -3   2   2 4330.98 261.839   3
   3  -2  -2 4828.40 262.510   4
   3  -2  -1 44.0509 56.7567   2
  -3   2   1 60.3972 50.8644   2
   3  -2  -1-13.6721 20.5054   1
   3  -2  -1 33.4927 23.7978   1
  -3   2   1 12.1177 62.0387   3
   3  -2  -1 75.3972 65.6093   4
   3  -2   0 104.884 42.0081   2
  -3   2   0 98.0385 43.5515   2
   3  -2   0 93.5882 27.5812   1
  -3   2   0 71.5298 55.0084   3
   3  -2   0 108.846 35.4137   1
   3  -2   0 165.027 67.7726   4
   3  -2   1 10928.1 298.213   2
   3  -2   1 10969.9 257.843   1
  -3   2  -1 11009.9 299.093   2
  -3   2  -1 10295.6 405.468   3
   3  -2   1 10898.3 407.079   4
  -3   2  -1 10598.4 269.069   1
   3  -2   2 1482.43 107.522   2
   3  -2   2 1367.67 103.876   1
  -3   2  -2 1546.46 108.820   2
  -3   2  -2 1368.69 152.629   3
   3  -2   2 1683.47 170.834   4
  -3   2  -2 1520.25 116.732   1
   3  -2   3 4844.98 205.407   1
  -3   2  -3 5175.65 174.440   2
  -3   2  -3 4877.34 281.996   3
   3  -2   3 5242.44 296.451   4
  -3   2  -3 4814.07 216.131   1
   3  -2   3 4755.55 171.612   2
   3  -2   4 48.6501 31.8538   2
  -3   2  -4 53.6973 56.5947   1
  -3   2  -4 30.6366 30.7117   2
   3  -2   4 52.0843 48.9974   1
  -3   2  -4 145.305 76.9607   3
   3  -2   4 231.375 101.081   4
   3  -2   5 5396.77 249.016   1
  -3   2  -5 5424.90 138.554   2
  -3   2  -5 4960.59 296.743   3
   3  -2   5 5434.61 322.048   4
   3  -2   5 4643.72 132.053   2
  -3   2  -5 5399.71 258.456   1
   3  -2   6 4745.21 243.853   1
  -3   2  -6 4459.12 97.0525   2
   3  -2   6 3538.01 87.6625   2
  -3   2  -6 5334.59 313.698   3
   3  -2   6 5778.77 335.660   4
  -3   2  -7 6.54580 65.7021   3
   3  -2   7-3.74486 45.4159   1
   3  -2   7 36.2256 63.6442   4
   3  -2   8 5956.49 302.350   1
  -3   2  -8 6073.89 346.160   3
   3  -2   8 6487.10 370.097   4
  -3   2  -9 1103.35 165.333   3
   3  -2   9 998.116 138.117   1
   3  -2   9 1122.60 167.008   4
   3  -2  10 1825.09 184.260   1
   3  -2  10 2236.96 233.565   4
  -3   2 -10 2060.13 221.285   3
   3  -2  11 4362.06 290.990   1
  -3   2 -11 4830.02 337.339   3
   3  -2  11 4325.23 329.001   4
  -3   2 -12-30.5163 67.6872   3
   3  -2  12-71.8295 71.3603   1
   3  -2  12 104.648 101.527   4
   3  -2  13 2794.74 253.320   1
  -3   2 -13 3241.90 289.720   3
   3  -2  13 2865.78 288.154   4
   3  -2  14 2653.25 256.814   1
   3  -2  14 2771.01 282.297   4
  -3   2 -14 3187.48 294.273   3
  -3   2 -15 304.133 128.418   3
   3  -2  15 141.647 89.4211   1
   3  -2  15 294.805 138.557   4
   3  -2  16 1957.86 245.726   1
  -3   2 -16 1442.94 216.547   3
  -3   2 -17-62.1871 91.3824   3
   3  -2  17 93.5203 111.762   4
   3  -2  17-52.0480 85.7267   1
   3  -2  18 334.299 135.545   1
  -3   2 -18 381.843 136.127   3
   3  -2  18 484.285 155.721   4
   3  -2  19-98.5357 103.657   1
  -3   2 -19-161.881 108.392   3
   3  -2  19 62.4313 111.787   4
  -3   2 -20 649.759 187.395   3
   3  -2  20 543.255 171.617   4
   3  -2  20 404.125 126.469   1
  -3   2 -21 77.5725 126.774   3
   3  -2  21 175.998 141.054   4
   3  -2  21 97.5160 100.580   1
   3  -2  22-34.4779 128.198   4
   3  -2  22-98.5937 131.131   1
   3  -2  23 531.771 192.854   1
  -3   2 -23 535.759 206.036   3
   3  -2  23 45.3261 130.346   4
   3  -2  24 208.503 156.878   1
  -3   2 -24 98.7842 121.777   3
   3  -2  24 111.853 138.409   4
  -3   2 -25 388.278 180.743   3
   3  -2  25 226.041 172.494   4
   3  -2  26 261.778 156.726   4
  -3   1  26 272.197 175.865   2
  -3   1  25 1534.36 291.071   2
   3  -1 -25 1173.02 259.324   3
   3  -1 -24 706.811 206.973   3
  -3   1  24 162.744 126.394   2
   3  -1 -23-69.6699 114.297   3
  -3   1  23 199.108 116.359   1
  -3   1  23 341.003 157.595   2
   3  -1 -22 1115.08 230.036   3
  -3   1  22 773.834 157.810   1
  -3   1  22 1019.09 218.131   2
  -3   1  21 178.194 95.9446   1
  -3   1  21 57.6277 115.106   2
   3  -1 -20 281.092 140.319   3
  -3   1  20 231.831 110.065   1
  -3   1  20 110.260 110.160   2
   3  -1 -19-69.0498 113.457   3
  -3   1  19-16.4681 68.9086   1
  -3   1  19-80.0187 106.386   2
   3  -1 -18 1749.20 248.084   3
  -3   1  18 1622.53 234.665   2
  -3   1  18 1361.92 175.608   1
   3  -1 -17 1744.03 145.974   4
   3  -1 -17 1717.06 244.945   3
  -3   1  17 1730.17 238.434   2
  -3   1  17 1416.84 173.608   1
   3  -1 -16 10526.8 339.269   4
   3  -1 -16 10067.5 528.386   3
  -3   1  16 11196.6 559.009   2
  -3   1  16 10112.5 420.623   1
   3  -1 -15 9316.17 308.517   4
   3  -1 -15 10145.1 527.504   3
  -3   1  15 10433.5 529.731   2
  -3   1  15 8899.92 380.093   1
   3  -1 -14 81.5119 44.9498   4
   3  -1 -14 95.0095 99.0984   3
  -3   1  14 67.2436 51.5640   1
  -3   1  14-56.2860 78.6619   2
   3  -1 -13 9529.13 477.363   3
  -3   1  13 9250.77 479.694   2
  -3   1  13 9950.74 363.685   1
  -3   1  13 9229.96 306.963   4
   3  -1 -13 9939.19 308.012   4
   3  -1 -12 11404.9 363.725   1
   3  -1 -12 13084.4 538.484   3
  -3   1  12 12236.1 518.064   2
  -3   1  12 12241.2 384.963   1
  -3   1  12 11427.1 335.099   4
   3  -1 -12 12072.5 333.801   4
   3  -1 -11 2831.70 178.938   1
   3  -1 -11 3390.07 271.584   3
  -3   1  11 3183.78 263.043   2
  -3   1  11 2990.92 172.908   4
  -3   1  11 3119.91 185.429   1
   3  -1 -11 3154.67 169.875   4
   3  -1 -10 4538.82 303.723   3
  -3   1  10 5062.76 318.677   2
  -3   1  10 5057.22 221.958   1
   3  -1 -10 4896.55 210.429   4
  -3   1  10 4666.67 211.622   4
   3  -1 -10 4633.68 208.576   1
   3  -1  -9 105.532 41.3963   4
  -3   1   9 149.699 48.8905   1
   3  -1  -9 118.767 83.1233   3
  -3   1   9 7.93123 61.5062   2
   3  -1  -9 99.6620 41.3115   1
  -3   1   9 117.050 51.1126   4
   3  -1  -8-8.06089 40.3429   4
  -3   1   8 32.1097 30.3608   1
   3  -1  -8 11.5031 65.0957   3
  -3   1   8 15.7335 56.5338   2
   3  -1  -8 53.4140 38.2073   1
  -3   1   8 5.77413 39.3022   4
   3  -1  -7 54.4544 41.6990   4
   3  -1  -7 101.506 61.3114   3
  -3   1   7 129.105 36.4194   1
  -3   1   7 102.800 66.6976   2
   3  -1  -7 116.603 35.3800   1
  -3   1   7 171.986 55.7144   4
  -3   1   6 27336.2 398.403   1
   3  -1  -6 28713.7 384.776   1
  -3   1   6 27858.4 518.319   4
   3  -1  -6 27810.3 672.256   3
  -3   1   6 26803.3 638.123   2
   3  -1  -6 29474.1 522.249   4
   3  -1  -5 1481.45 157.189   3
   3  -1  -5 1670.11 90.1377   1
  -3   1   5 1561.36 129.592   4
  -3   1   5 1464.58 149.294   2
  -3   1   5 1663.29 93.8778   1
   3  -1  -5 1564.16 128.738   4
   3  -1  -4 654.656 115.527   3
   3  -1  -4 601.545 54.6390   1
   3  -1  -4 744.432 97.9104   4
  -3   1   4 519.102 91.9849   2
  -3   1   4 602.592 59.8416   1
  -3   1   4 617.554 86.3574   4
   3  -1  -3 26232.6 518.216   4
   3  -1  -3 23921.9 535.165   2
  -3   1   3 25258.1 540.418   2
   3  -1  -3 25600.8 343.652   1
  -3   1   3 24089.9 579.403   3
   3  -1  -3 24316.4 338.694   1
   3  -1  -3 25676.3 522.779   4
   3  -1  -2 395.654 81.7848   4
   3  -1  -2 483.909 101.914   4
   3  -1  -2 220.417 61.2795   2
  -3   1   2 292.644 79.7363   2
  -3   1   2 518.786 117.792   3
   3  -1  -2 318.648 54.2758   1
   3  -1  -2 336.881 55.6805   1
   3  -1  -1 1312.36 94.1607   1
   3  -1  -1 1376.27 132.073   4
   3  -1  -1 1002.09 108.281   2
   3  -1  -1 1205.14 130.384   4
  -3   1   1 1315.52 124.122   2
  -3   1   1 1223.10 138.393   3
   3  -1  -1 1254.48 89.4580   1
   3  -1   0 23719.6 529.655   4
   3  -1   0 23512.4 445.873   2
   3  -1   0 23311.3 377.550   1
  -3   1   0 23912.1 442.331   2
   3  -1   0 23666.6 391.314   1
   3  -1   0 24205.2 545.885   4
   3  -1   1 7377.39 238.893   2
  -3   1  -1 7783.53 237.034   2
  -3   1  -1 6875.54 307.778   3
   3  -1   1 7851.05 242.627   1
   3  -1   1 7627.44 316.794   4
   3  -1   1 7685.78 233.052   1
   3  -1   2 2625.77 152.226   1
   3  -1   2 2376.24 128.089   2
  -3   1  -2 2778.49 130.608   2
  -3   1  -2 2253.72 180.993   3
   3  -1   2 2808.99 199.736   4
   3  -1   2 2774.12 151.896   1
   3  -1   3 9780.46 226.246   2
  -3   1  -3 10327.9 321.879   1
  -3   1  -3 10743.6 225.210   2
  -3   1  -3 10768.9 381.199   3
   3  -1   3 11040.8 402.205   4
   3  -1   3 10790.4 314.413   1
   3  -1   4 8588.82 171.249   2
  -3   1  -4 8913.75 174.242   2
  -3   1  -4 8927.13 352.335   3
  -3   1  -4 9337.50 323.971   1
   3  -1   4 10110.8 393.722   4
   3  -1   4 9286.58 309.455   1
  -3   1  -5 101.011 44.7723   1
   3  -1   5 121.393 65.4508   1
  -3   1  -5 70.2603 67.1389   3
  -3   1  -6 3977.83 262.936   4
  -3   1  -6 4043.34 249.520   3
   3  -1   6 3903.52 223.133   1
   3  -1   7 12533.6 413.603   1
  -3   1  -7 12579.4 470.709   4
  -3   1  -7 12716.7 446.268   3
   3  -1   8 548.753 108.219   1
  -3   1  -8 445.523 103.222   3
  -3   1  -8 355.944 94.1227   4
  -3   1  -9 232.385 100.544   4
   3  -1   9 129.610 74.7542   1
  -3   1  -9 117.278 68.9670   3
  -3   1 -10 917.825 153.344   4
  -3   1 -10 922.449 135.755   3
   3  -1  10 818.563 124.864   1
  -3   1 -11 143.134 95.3899   4
   3  -1  11 54.9628 66.0542   1
  -3   1 -11 62.1730 59.6952   3
  -3   1 -12 1.63425 80.8432   4
  -3   1 -12-25.1098 78.4486   3
   3  -1  12 6.26710 68.2869   1
   3  -1  13 9021.52 444.927   1
  -3   1 -13 10402.9 496.213   4
  -3   1 -13 9949.77 466.446   3
  -3   1 -14 1297.94 191.725   4
  -3   1 -14 1068.25 167.138   3
   3  -1  14 731.083 148.714   1
  -3   1 -15 194.623 99.9900   4
  -3   1 -15 94.6356 68.3729   3
   3  -1  15-80.6429 74.8274   1
  -3   1 -16 6246.13 418.225   4
  -3   1 -16 6489.34 415.048   3
  -3   1 -17 1153.26 190.516   4
  -3   1 -17 1265.37 203.716   3
   3  -1  17 983.111 182.180   1
  -3   1 -18-80.7427 84.7094   4
  -3   1 -18 61.6722 95.8890   3
   3  -1  18 149.984 111.493   1
  -3   1 -19-1.28522 87.5745   4
  -3   1 -19 0.32019 88.1695   3
   3  -1  19-14.0353 87.0464   1
  -3   1 -20 555.321 148.635   4
  -3   1 -20 421.761 133.368   3
   3  -1  20 505.628 143.773   1
  -3   1 -21 328.535 131.318   4
   3  -1  21 123.506 102.338   1
  -3   1 -21 251.474 136.966   3
  -3   1 -22 72.4659 112.931   4
  -3   1 -22 245.138 140.902   3
   3  -1  22-69.7346 132.020   1
  -3   1 -23 277.351 155.250   4
   3  -1  23 138.949 131.505   1
  -3   1 -23 18.6918 128.082   3
  -3   1 -24 117.169 135.130   4
  -3   1 -24-180.016 132.723   3
   3  -1  24-150.549 164.361   1
  -3   1 -25-246.746 156.026   4
  -3   1 -25 11.9114 137.270   3
   3  -1  25-182.874 165.969   1
  -3   1 -26 398.105 185.129   4
  -3   1 -26 216.789 158.018   3
  -3   1 -27 305.011 171.821   4
   3   0 -25 42.1617 157.368   3
  -3   0  25 227.924 136.066   1
  -3   0  25 242.855 148.473   2
   3   0 -24-87.9505 132.181   3
  -3   0  24 101.647 108.950   1
  -3   0  24-56.0911 113.204   2
   3   0 -23 1305.08 241.977   3
  -3   0  23 810.948 186.326   1
  -3   0  23 837.496 220.800   2
   3   0 -22 238.380 146.448   3
  -3   0  22 650.551 161.671   1
  -3   0  22 287.324 147.891   2
   3   0 -21 233.457 147.807   3
  -3   0  21 35.4899 79.3926   1
  -3   0  21 153.837 106.967   2
   3   0 -20 119.103 124.456   3
  -3   0  20-143.897 104.617   1
  -3   0  20-60.6292 99.3174   2
   3   0 -19 1411.83 229.710   3
  -3   0  19 1373.42 200.719   1
  -3   0  19 1081.94 201.107   2
   3   0 -18-20.4531 107.914   3
  -3   0  18 59.2788 66.0764   1
  -3   0  18 2.92672 109.143   2
   3   0 -17 245.026 120.190   3
  -3   0  17 199.095 84.3996   1
  -3   0  17 136.748 88.8634   2
   3   0 -16 6018.99 410.739   3
  -3   0  16 6363.64 434.297   2
  -3   0  16 5632.52 343.714   1
   3   0 -15 1185.29 193.752   3
  -3   0  15 1405.50 205.679   2
  -3   0  15 1272.38 162.018   1
   3   0 -15 846.446 70.1990   4
   3   0 -14 396.949 48.6203   4
   3   0 -14 756.701 158.485   3
  -3   0  14 586.532 113.157   1
  -3   0  14 587.444 134.075   2
   3   0 -13 223.663 40.8642   4
   3   0 -13 163.077 88.6470   3
  -3   0  13 210.325 109.266   2
  -3   0  13 249.226 73.8090   1
  -3   0  13 181.910 36.0488   4
   3   0 -12 3393.06 129.434   4
   3   0 -12 3866.49 293.516   3
  -3   0  12 3974.81 308.932   2
  -3   0  12 3452.05 232.149   1
  -3   0  12 3258.22 131.832   4
   3   0 -11 2194.00 216.417   3
  -3   0  11 2274.57 228.661   2
  -3   0  11 1811.03 163.366   1
  -3   0  11 1940.86 101.723   4
   3   0 -11 2038.58 100.382   4
  -3   0  10-69.2493 67.2295   1
   3   0 -10 21.0504 23.4838   4
   3   0 -10-98.6767 89.3968   3
  -3   0  10-25.6573 63.2846   2
  -3   0  10 45.2312 27.9978   4
   3   0  -9 1251.08 123.956   1
   3   0  -9 1551.97 176.411   3
  -3   0   9 1197.89 156.835   2
  -3   0   9 1483.49 137.100   1
   3   0  -9 1254.18 83.7192   4
   3   0  -8 223.853 39.3322   4
   3   0  -8 260.202 62.9643   1
  -3   0   8 246.704 64.2057   1
   3   0  -8 251.036 46.6570   4
   3   0  -8 205.530 85.3082   3
  -3   0   8 150.119 82.8590   2
   3   0  -7 1122.93 84.7351   4
   3   0  -7 960.964 101.535   1
   3   0  -7 791.114 124.004   3
  -3   0   7 1158.19 145.996   2
   3   0  -7 994.068 78.3322   4
  -3   0   7 893.559 96.9082   1
   3   0  -6 49.1976 31.6325   4
   3   0  -6-6.03733 31.1698   4
   3   0  -6 38.0859 33.4309   1
   3   0  -6-32.9768 56.5737   3
  -3   0   6-27.6612 34.4390   1
   3   0  -5 917.740 84.1994   4
  -3   0   5 754.361 84.8744   1
   3   0  -5 821.903 116.860   3
  -3   0   5 987.570 127.333   2
   3   0  -5 1030.23 96.5946   1
   3   0  -5 1053.84 88.9833   4
   3   0  -4 1046.17 93.8321   4
   3   0  -4 1064.77 91.9007   4
   3   0  -4 1106.28 126.258   3
  -3   0   4 1072.90 101.279   1
  -3   0   4 1201.71 136.042   2
   3   0  -4 1255.27 101.412   1
   3   0  -3 173.550 44.4855   1
   3   0  -3 187.141 46.8827   4
   3   0  -3 43.8582 48.9357   3
   3   0  -3 91.1369 52.1773   2
  -3   0   3 156.055 50.2292   1
  -3   0   3 118.531 63.1398   2
   3   0  -3 204.561 53.2819   4
   3   0  -2-38.2878 39.9546   4
  -3   0   2-8.15535 41.8474   1
   3   0  -2 10.7990 29.2194   1
   3   0  -2 48.8064 40.8922   4
   3   0  -2 86.4591 49.1651   2
  -3   0   2 67.0221 61.1615   2
   3   0  -2-8.65498 47.9250   3
   3   0  -1-6.53879 37.8538   4
   3   0  -1 13.0453 34.9151   2
   3   0  -1-51.4400 37.7624   1
  -3   0   1-27.4825 50.4899   2
   3   0  -1-19.3115 40.0346   3
  -3   0   1-20.9778 45.3058   1
  -3   0   1 85.0373 58.6294   3
   3   0  -1 19.7241 38.7159   4
   3   0   0 36.5575 35.4851   1
   3   0   0 13.0540 33.9105   1
   3   0   0-9.76353 40.3181   4
   3   0   0-27.5415 46.7432   2
   3   0   0 0.43548 36.9443   3
  -3   0   0 54.6023 53.6459   2
  -3   0   0-41.8946 47.1165   3
   3   0   0 44.5261 45.4693   4
   3   0   1 106.246 51.5097   4
  -3   0  -1-96.9738 67.9044   4
   3   0   1 67.8390 49.3408   1
   3   0   1 79.0328 43.4466   1
   3   0   1 18.6542 33.5677   2
   3   0   1 62.8410 45.8364   3
  -3   0  -1 34.3868 44.7524   3
  -3   0  -1 107.559 42.4354   2
   3   0   2 214.837 54.5083   1
   3   0   2 274.595 64.8315   1
   3   0   2 195.377 63.9693   4
  -3   0  -2 123.324 65.6173   4
   3   0   2 162.984 46.8028   2
   3   0   2 193.979 61.3423   3
  -3   0  -2 222.474 68.8046   3
  -3   0  -2 264.722 53.6249   2
   3   0   3 185.152 61.0464   1
  -3   0  -3 82.9348 56.8858   4
   3   0   3 164.715 42.0959   2
   3   0   3 36.8512 40.5723   3
  -3   0  -3 179.033 63.9484   3
   3   0   3 114.472 45.7491   1
   3   0   3 130.053 38.7780   2
   3   0   4 368.841 43.8125   2
  -3   0  -4 239.511 56.6521   4
   3   0   4 412.513 79.8647   1
   3   0   4 313.456 69.4370   1
   3   0   4 299.325 43.0438   2
   3   0   4 295.889 67.6233   3
  -3   0  -4 241.300 63.5671   3
  -3   0  -5 1327.48 150.093   4
   3   0   5 1275.57 69.2804   2
   3   0   5 1277.04 124.041   3
  -3   0  -5 1331.71 127.602   3
   3   0   5 1290.55 67.4108   2
   3   0   5 1465.02 135.375   1
  -3   0  -6 33.0905 65.0395   4
   3   0   6 156.528 77.7938   1
   3   0   6 177.354 64.4244   3
  -3   0  -6 30.7666 58.4063   3
  -3   0  -7 1203.93 154.508   4
   3   0   7 1131.69 130.354   1
  -3   0  -7 1241.75 129.556   3
  -3   0  -8 86.0040 73.3078   4
   3   0   8-48.0278 59.8520   1
  -3   0  -8-3.66548 47.5132   3
  -3   0  -9 2618.56 227.653   4
  -3   0  -9 2633.25 197.449   3
   3   0   9 2389.30 203.068   1
  -3   0 -10 2427.62 228.840   4
  -3   0 -10 2567.47 206.735   3
   3   0  10 2588.21 219.791   1
  -3   0 -11-41.0337 64.4498   4
   3   0  11 49.9939 71.4677   1
  -3   0 -11 8.14264 63.2026   3
  -3   0 -12 1520.52 190.974   4
  -3   0 -12 1210.01 155.509   3
   3   0  12 1281.65 164.820   1
   3   0  13 4100.25 306.261   1
  -3   0 -13 4176.38 321.898   4
  -3   0 -13 4182.02 283.093   3
  -3   0 -14 153.285 84.7717   4
   3   0  14 242.032 105.806   1
  -3   0 -14 35.8832 67.2049   3
  -3   0 -15 784.093 164.295   4
   3   0  15 419.264 120.324   1
  -3   0 -15 420.915 122.434   3
   3   0  16 1194.29 197.268   1
  -3   0 -16 1300.23 195.377   4
  -3   0 -16 1120.02 175.446   3
  -3   0 -17-24.0310 79.2253   4
  -3   0 -17 195.946 82.4981   3
   3   0  17 7.46897 89.8913   1
  -3   0 -18-61.5469 89.1777   4
  -3   0 -18 13.6323 94.3735   3
   3   0  18-10.6416 86.1106   1
  -3   0 -19 46.6126 96.5488   4
  -3   0 -19-45.6180 80.4489   3
   3   0  19-27.6604 98.7312   1
  -3   0 -20 132.678 115.029   4
  -3   0 -20-74.0804 116.115   3
   3   0  20 304.082 142.141   1
  -3   0 -21 90.8649 95.9941   4
  -3   0 -21 239.326 125.396   3
   3   0  21-33.4985 91.5660   1
  -3   0 -22-35.5264 109.387   4
  -3   0 -22 269.017 146.344   3
   3   0  22 228.623 125.064   1
  -3   0 -23 291.191 147.106   4
  -3   0 -23 390.440 158.464   3
   3   0  23 635.723 184.409   1
  -3   0 -24-11.0600 121.826   4
  -3   0 -24 258.993 159.968   3
   3   0  24 21.5176 108.227   1
  -3   0 -25 209.564 158.974   4
  -3   0 -25 115.944 137.012   3
   3   0  25 328.818 166.317   1
  -3   0 -26 553.594 180.842   4
  -3   0 -26 469.828 180.545   3
   3   0  26 688.552 213.926   1
  -3   0 -27 539.692 195.593   4
  -3   0 -27 50.5176 147.778   3
  -3  -1  26 1692.11 283.849   1
  -3  -1  25 39.8628 148.894   1
  -3  -1  25 76.9276 132.973   2
   3   1 -24 34.5746 143.788   3
  -3  -1  24 161.988 128.952   1
  -3  -1  24-20.5498 152.233   2
   3   1 -23 594.152 179.398   3
  -3  -1  23 443.455 153.372   1
  -3  -1  23 346.449 166.596   2
   3   1 -22 190.138 127.632   3
  -3  -1  22 230.990 128.796   1
  -3  -1  22-112.655 112.399   2
   3   1 -21 142.514 120.564   3
  -3  -1  21-81.5359 108.390   1
  -3  -1  21-28.2567 133.006   2
   3   1 -20 0.36599 109.211   3
  -3  -1  20 25.3520 80.0678   1
  -3  -1  20 57.5638 114.445   2
   3   1 -19 443.473 160.210   3
  -3  -1  19 202.960 99.7261   1
  -3  -1  19 387.795 146.190   2
   3   1 -18 120.934 88.4490   3
  -3  -1  18 184.678 104.727   1
  -3  -1  18 311.183 125.141   2
   3   1 -17 4539.33 363.356   3
  -3  -1  17 4292.33 368.277   2
  -3  -1  17 4257.31 335.565   1
   3   1 -16 5731.95 403.346   3
  -3  -1  16 5786.09 410.086   2
  -3  -1  16 4919.23 342.189   1
   3   1 -15 547.483 126.996   3
  -3  -1  15 397.785 122.623   2
  -3  -1  15 589.041 126.756   1
   3   1 -14 3396.24 293.967   3
  -3  -1  14 3101.99 286.385   2
  -3  -1  14 2507.03 233.085   1
   3   1 -13 2567.33 247.647   3
  -3  -1  13 2396.14 256.492   2
  -3  -1  13 2195.74 213.566   1
   3   1 -12 673.860 135.804   3
  -3  -1  12 398.883 105.748   2
  -3  -1  12 510.822 117.281   1
  -3  -1  11 515.381 106.208   1
   3   1 -11 579.352 131.140   3
  -3  -1  11 777.099 146.726   2
  -3  -1  10 88.0566 63.5623   1
   3   1 -10 20.4761 65.3095   3
  -3  -1  10 4.16131 82.7538   2
  -3  -1   9 55.9971 52.6212   1
   3   1  -9-37.6865 63.8118   3
  -3  -1   9 57.3754 66.9513   2
  -3  -1   8 26.6176 50.5855   1
   3   1  -8 8.65940 56.2596   3
  -3  -1   8 60.8392 60.3927   2
   3   1  -7 12621.3 432.012   3
[truncated: 225,537 more chars]
